# Supplementary material for: A murine model of hypertensive heart disease in older women
Source: PeerJ. 2024 May 23;12:e17434. doi: 10.7717/peerj.17434 (PMC11128216; doi:10.7717/peerj.17434)
Supplement: Supplemental Information 2 [file peerj-12-17434-s002.xlsx]

## Sheet: Figure 2
Figure 2A
				12 months
Ctrl	AngII 14d	AngII 28d			Ctrl								AngII
20	19	20.5		Non-Ovx	26.7	26.2		28.9	27.6	29.6	29	28	26.5	23	25.1	25.9	26	22.1		24.8
20.5	17.5	21.2		Ovx	47.5	40.6		35.1	47.1	43.7	46.1	43.4	30.9	34.7		30.1	25.1	31.1	29	30.1
19	20.4	19.8
20.7	19.7	17.5		24 months
19.1	20.3	16.6			Ctrl								AngII
19.8	19	19.2		Non-Ovx	29.4	25.4	30.2	33.2	24.3	37.7	36.1	26.5	22.1	23.6	24.4	24.7	23	24.1	22.4
17.7	19.1	18.8		Ovx	33	31	35.5	31.3	24.6	37.4	40.7	23.1	30.3	26.4	27.6	23.9	28	27.3	28.9	28.4
18.3	20.2	20
Figure 2B
				12 months
Ctrl	AngII 14d	AngII 28d			Ctrl								AngII
21.51	21.08	21.66		Non-Ovx	22	22.06		22.02	21.75	22.42	22.52	22.12	22.05	21.82	21.61	21.77	21.97	21.44		21.78
21.74	21.12	21.59		Ovx	23.86	23.74		23.71	24.07	23.86	23.96	23.8667	23.39	23.6		23.6	23.42	23.73	23.36	23.52
21.51	21.72	22.04
22.32	21.7	21		24 months
21.54	21.42	20.76
21.74	20.59	21.47			Ctrl								AngII
21.38	21.27	21.5		Non-Ovx	22.84	22.51	22.57	23.25	22.35	23.15	23.6	23.16	23	22.73	22.76	22.92	22.55	22.86	22.95
21.61	21.22	21.5		Ovx	23.12	23.16	23.58	23.26	22.61	23.53	23.63	22.42	23.33	23.34	22.85	23.28	23.26	23.08	22.9	23.46
Figure 2C
				12 months
Ctrl	AngII 14d	AngII 28d			Ctrl								AngII
104.7	122.1	134.2		Non-Ovx	135.5	131.5		116.9	100.5	125.9	122.3	122.1	139.9	167.2	149.4	128.9	153.3	132.4		145.2
108.9	115.3	122.9		Ovx	145	145		113.4	145.4	122.1	128.5	133.2	149.3	147		147.7	154.1	174.9	145.1	153
97.8	113.8	118.6
107.2	115.2	124.4		24 months
98.1	116.6	111.2
99.8	110.4	112.3			Ctrl								AngII
101	117	124.5		Non-Ovx	154.7	125.7	151.3	165.9	136.5	150.9	159	155.6	169.1	137.4	163.7	176.9	133	160.5	176.8
93.4	113	121.7		Ovx	136.5	120	135.2	136.6	130.1	136.3	141.2	116.4	159.1	171.5	160.7	183.8	175.2	142.7	181.8	147.2
Figure 2D
				12 months
Ctrl	AngII 14d	AngII 28d			Ctrl								AngII
4.87	5.19	6.2		Non-Ovx	6.17	5.96		5.31	4.62	5.62	5.43	5.52	6.34	7.66	6.91	5.92	6.98	6.18		6.67
5.01	4.88	5.69		Ovx	6.08	6.11		4.78	6.04	5.12	5.36	5.58	6.38	6.23		6.26	6.58	7.37	6.21	6.51
4.55	4.77	5.38
4.8	4.8	5.92		24 months
4.55	5	5.36
4.59	4.9	5.23			Ctrl								AngII
4.72404	4.61	5.79		Non-Ovx	6.77	5.58	6.7	7.14	6.11	6.52	6.74	6.72	7.35	6.04	7.19	7.72	5.9	7.02	7.7
4.32	5.32516	5.66		Ovx	5.9	5.18	5.73	5.87	5.75	5.79	5.98	5.19	6.82	7.35	7.03	7.9	7.53	6.18	7.94	6.27

## Sheet: Figure 3
Figure 3A
				12 months
Ctrl	AngII 14d	AngII 28d			Ctrl								AngII
1.33	1.43	1.55		Non-Ovx	1.52	1.54	1.48	1.66	1.76	1.49	1.79	1.72	2.04	2.02	2.21	2.05	2.06	1.97	1.85	1.92
1.21	1.76	1.58		Ovx	1.77	1.59	1.56	1.58	1.77	1.72	1.79	1.8	2.32	2.05	1.66	1.64	1.93	1.93	1.93	1.97
1.43	1.81	1.75
1.46	1.53	1.76		24 months
1.1	1.77	1.64			Ctrl								AngII
1.37	1.56	1.74		Non-Ovx	2.05	1.67	1.91	2	1.82	2.06	1.74	1.51	1.82	1.82	1.77	2.02	1.84	1.94	2.2
1.36	1.56	1.52		Ovx	1.63	1.56	1.78	1.54	1.48	1.71	1.69	1.59	1.93	2.25	1.92		1.97	1.65	2.28	2.21
1.44	1.72	1.55
Figure 3B
				12 months
Ctrl	AngII 14d	AngII 28d			Ctrl								AngII
3.56	3.94	3.76		Non-Ovx	3.7	3.57	4.34	3.56	3.89	3.59	4.13	3.88	3.43	3.6	3.43	3.13	3.46	3.47	3.43	3.43
3.71	3.59	4.18		Ovx	4.11	4.29	3.89	3.8	3.85	3.99	4.05	4.29	3.65	3.47	4.08	3.88	3.54	3.9	3.88	3.86
3.68	3.1	4.54
3.79	3.76	3.82		24 months
3.83	3.51	3.97
3.62	3.46	3.73			Ctrl								AngII
3.81	3.56	4.02		Non-Ovx	4.02	3.92	3.86	4.2	3.63	3.99	3.83	4.2	3.39	3.69	3.46	4.06	3.38	3.77	3.76
3.75	3.67	3.76		Ovx	4.02	3.91	3.79	3.93	3.88	3.73	3.82	3.7	3.44	3.51	3.7		3.96	3.64	3.66	3.37
Figure 3C
				12 months
Ctrl	AngII 14d	AngII 28d			Ctrl								AngII
0.37	0.36	0.41		Non-Ovx	0.41	0.43	0.34	0.47	0.45	0.42	0.43	0.44	0.59	0.56	0.65	0.65	0.6	0.57	0.54	0.56
0.33	0.49	0.38		Ovx	0.43	0.37	0.4	0.42	0.46	0.43	0.44	0.42	0.64	0.59	0.41	0.42	0.55	0.5	0.5	0.51
0.39	0.58	0.38
0.39	0.41	0.46		24 months
0.29	0.5	0.41
0.38	0.45	0.47			Ctrl								AngII
0.36	0.44	0.38		Non-Ovx	0.51	0.43	0.49	0.48	0.5	0.52	0.45	0.36	0.54	0.49	0.51	0.5	0.54	0.52	0.59
0.38	0.47	0.41		Ovx	0.4	0.4	0.47	0.39	0.38	0.46	0.44	0.43	0.56	0.64	0.52		0.5	0.45	0.62	0.66
Figure 3D
				12 months
Ctrl	AngII 14d	AngII 28d			Ctrl								AngII
31.98	34.9	23.62		Non-Ovx	35.22	24	44.86	39.4	37.07	27.63	40.21	31.8	27.26	24.3	29.37	22.15	26.98	27.12	23.97	27.48
25.09	26.9	36.47		Ovx	33.83	30.38	28.61	23.34	40.96	35.1	33.66	44.75	35.35	19.76	23.25	29.76	25.05	26.42	21.04	32.45
28.99	25.1	27.65
34.11	24.9	31.11		24 months
23.63	29.1	28.59
26.73	25.3	26.01			Ctrl								AngII
24.67	27.2	28.31		Non-Ovx	39.38	27.18	36.1	35.09	33.61	36.65	36.05	45.42	30.05	25.68	25.49	34.19	21.43	36.13	37.27
22.64	22.4	26.37		Ovx	32.71	36.88	31.95	30.8	30.25	34.2	26.23	31.4	25.94	29.75	27.55	24.83	34.13	25.66	30.41	20.52

## Sheet: Figure 4
Figure 4A
	Intact									Ovx
Ctrl	4.8	3.4	4.3	5	4.3	3.9	5.3	6.9		3.3	2.6	3	3.8	3.9	2.8	4	4	2.5
AngII	9.6	6.4	9.8	6.8	6.3	5	6.3			12	6.1	7.6	9.5	6.7		7.4	9.1	7.5
	Intact									Ovx
Ctrl	2.2	2.15	2.26	2.34	2.18	2.45	2.59	2.69		2.4	2.33	2.46	2.41	2.43	2.65	2.36	2.41	2.19
AngII	2.58	2.38	2.73	2.68	2.93	2.53	2.56			2.39	2.56	2.74	3.44	2.89		2.31	2.75	2.78
	Intact									Ovx
Ctrl	664.62		634.91		629.61	708.6	606.49	677.78	653.67	612.27	608.42	660.44		658.51	645.02	621.91		646.95
AngII	660	468	635	494	572	584	510	560.43		589.15	641.38	610.35		477.41			413.83	575.67
	Intact									Ovx
Ctrl	402.39		403.72		361.81	494.75	400.35	436.95	416.66	375.3	402.27	413.83	502.46	477.41	425.39	435.03	381.08	431.17
AngII	448	298	396	317	346	470	310	369.29		394.57	432.62	427.32		332.92			290.53	394.57
Figure 4B
	Intact									Ovx
Ctrl	68.04	48.54	59.91	52.54	63.19	57.7	58			50.21		62.79	56.4	49.78	55.33	61.79	52.59	59.76
AngII	53.37	52.88	58.36	52.66	56.59	63.13	65.08			64.41	66.62	56.02	46.91	57.21		55.4	44.54	48.04
	Intact									Ovx
Ctrl	865	791.5			886	712.5		741.2	801.3	813	839.3	796.5	692.5	767	822.8
AngII	651.5	682.8	772.3	705.1	749.5	724.4	755.7	770.4	650.9	769.1	719.4	753	656.3	665.2	768.8	763.3
	Intact									Ovx
Ctrl	18.94		18.86	13.64	17.34	20.55	20.71	23.63		18.15	16.14	17.62	18.44	18.76	21.07	18.64	14.88	21.33
AngII	16.22	12.66	12.31	12.67	18.63	17.1	19.43			12.09	15.44	14.43	14.75	17.24		14.52	13.93	11.47
	Intact									Ovx
Ctrl	52		45.2	55.5	59.7	60.4	57.8	62.4		63.2	53	45.3	66.1	54.3	44.2	51.8
AngII	91.3	116	90.8	90.1	138.6	80	121.5			86.7	97.3	94.6	82.7	110.1	98.8	100.2	87.5	102.9
Figure 4C
	12 months									24 months
Ctrl	0.71	1.75	1.45	2.1	2.27	2.25	1.4			1.88	1.41	0.99	0.81	0.79	0.83	0.81	0.94	1.44
AngII	1.86	0.76	1.8	10.64	8.54	1.64	6.8	5.79		8.32	4.05	0.93	2.35	6.98	2.94	0.39
	12 months									24 months
Ctrl	0.76	2.02	0.8	1.25	1.79	1.27	0.92	1.74		0.61	1.16	0.92	0.99	0.91	1.01	0.9	1	0.9
AngII	3.21	6.26		2.32	10.21	0.94	4.27	1.54		3.2	3.96	8.15	2.53	3.27	0.83	1.76	2.61
	12 months									24 months
Ctrl	534.181	311.193		320.873			264.109			241.535	387.51	623.198	466.15				575.457
AngII	401.836	458.367		630.052	415.853		383.715	382.012		479.431		661.26	486.943	591.564	382.437	578.206
	12 months									24 months
Ctrl	271.311	445.435			386.464	299.964	266.51	473.391		475.056		453.256	341.007	487.562	517.532	662.77	506.884
AngII	479.973				391.924	343.059		414.033		674.425	592.068	694.559	659.363	520.048	421.816	589.628	468.589

## Sheet: Figure 5
Figure 5B
	Veh				AngII
Control	54.3113	74.9049	167.238	87.9386	140.859	76.3789	85.9106	77.0635
Ovx	222.184	130.426	192.335	78.3723	301.04	374.047	369.663	466.698
	Veh				AngII
Control	577.895	532.479	384.442	467.181	220.943	580.334	373.071	368.515
Ovx	507.152	561.825	465.069	739.898	227.773	194.577	226.388	181.077
	Untreated				AngII
Control	1050.71	852.895	1035.97	904.93	1104.64	984.509	896.507	983.202
Ovx	1286.67	902.273	790.339	794.682	1586.97	1516.43	1563.87	1604
	Veh				AngII
Control	1381.2	1072.74	744.074	1421.84	963.448	1016.75	1097.3	1368.15
Ovx	951.72	872.241	849.221	1109.8	574.482	459.086	468.312	420.249
	Veh				AngII
Control	1381.2	1072.74	744.074	1421.84	963.448	1016.75	1097.3	1368.15
Ovx	951.72	872.241	849.221	1109.8	574.482	459.086	468.312	420.249
Figure 5C
Young	Old		Young	Old		Young	Old		Young	Old		Young	Old
222.509	65.612		273.104	688.381		1685.86	1322.18		553.977	1650.22		1270.55	1823.18
93.6409	90.51		394.362	634.418		982.376	1073.49		790.789	1281.96		1634.71	1668.79
163.9	203.908		293.425	462.186		1638.12	1315.72		638.1	897.238		1492.03	1551.5
287.695	106.121		241.964	555.894		1586.78	1137.5		413.247	1696.92		1325.59	1851.73
573.838			53.6368			1746.45			134.598			1044.04
476.859			71.1104			1311.47			266.615			1222.89
