# Supplementary material for: A murine model of hypertensive heart disease in older women
Source: PeerJ. 2024 May 23;12:e17434. doi: 10.7717/peerj.17434 (PMC11128216; doi:10.7717/peerj.17434)
Supplement: Supplemental Information 3 [file peerj-12-17434-s003.xlsx]

## Sheet: Ctrl_vs_AngII.genes.deseq.count
	Females Controls 24-month-old			Females Controls 24-month-old Angiotensin II					Females Ovariectomised 24-month-old				Females Ovariectomised 24-month-old Angiotensin II
	Sample55	Sample56	Sample57	Sample58	Sample59	Sample60	Sample61	Sample62	Sample63	Sample64	Sample65	Sample66	Sample67	Sample68	Sample69	Sample70
0610005C13Rik	0	0	3.23336	0.882478	0	0	0	2.48221	1.05309	0	2.22279	2.50213	0	0	0	0
0610009B22Rik	315.466	338.746	247.23	294.494	202.323	263.507	233.479	249.682	286.528	220.384	244.915	170.889	274.866	303.798	240.355	200.104
0610009E02Rik	19.667	11.3514	22.3872	25.4546	27.9535	38.7163	23.1872	16.6719	9.71204	12.1902	16.1887	26.1165	15.8757	6.67785	24.1114	23.1255
0610009L18Rik	75.6828	106.175	81.5506	80.7902	77.6995	95.9681	94.5113	69.6184	75.804	96.3636	69.7303	98.1165	118.16	78.5795	86.6262	63.5965
0610010B08Rik	18.3851	24.0816	0	99.3345	115.526	60.2749	121.661	0	0	59.8843	146.839	58.0905	0	63.4241	92.4123	58.9083
0610010F05Rik	199.502	239.275	227.16	317.368	321.682	252.311	320.245	316.373	181.641	220.331	200.286	185.699	231.348	290.078	275.934	227.495
0610010K14Rik	340.16	388.524	353.467	346.185	368.088	307.339	309.811	290.43	258.944	327.263	308.924	268.856	303.137	319.303	274.596	292.985
0610012G03Rik	1025.64	1089.56	1052.86	917.202	837.268	1010.83	956.97	1041.13	806.886	882.447	864.838	831.753	934.328	1026.88	842.587	908.696
0610030E20Rik	677.303	595.065	586.655	607.324	729.909	669.303	580.023	563.483	504.028	652.914	575.798	553.093	599.696	515.849	444.789	561.163
0610031O16Rik	0	0	0	0	0	0	0	0	1.12751	0	0	0	0	0	0	1.0063
0610037L13Rik	466.855	521.638	476.981	486.349	579.656	450.117	526.762	454.043	490.358	494.974	538.179	518.493	502.653	528.552	550.695	507.112
0610038B21Rik	8.6341	4.05849	12.9557	1.02086	10.2243	7.62314	0.939416	6.69343	10.5163	18.6091	9.43789	11.9122	6.55335	7.43794	5.69006	2.95076
0610039H22Rik	0	0	0	0	0	0	0.961487	1.15523	0	0	0	0	0	0	0	0
0610039K10Rik	1.06876	1.00306	0	0	2.33885	1.08163	5.62262	0	0	0	0.949464	0	8.80252	0.83577	1.148	0
0610040B10Rik	34.1346	19.9295	38.9062	24.777	32.5213	29.5651	31.1126	22.8545	12.7452	21.3681	14.2475	23.4092	28.7765	14.2671	23.0064	35.9811
0610040F04Rik	0.916695	0	0	0.899284	2.39063	0	0	1.98962	1.8793	2.85543	2.81256	2.96612	0	2.08286	0	0.819202
0610040J01Rik	10.6449	23.8948	2.95816	35.1986	7.02778	14.0308	13.4353	11.4285	17.0799	7.8388	7.6037	8.13318	6.53499	10.0338	6.94934	10.8821
0610043K17Rik	1.03886	2.91936	6.09345	7.46832	4.58891	0	0	0	0	0.955445	3.85195	9.05816	4.28425	10.6904	4.70369	1.02487
1010001N08Rik	251.107	238.203	197.21	160.642	224.422	215.701	220.239	317.107	248.071	201.086	269.918	271.468	222.585	200.653	170.785	203.305
1110002J07Rik	1.04344	0.979719	1.9933	2.10835	2.31517	2.14112	2.94785	0	3.0775	3.61239	0.881892	0.824296	3.96195	2.29392	0	3.793
1110002L01Rik	275.093	305.465	288.741	356.433	323.892	312.305	262.182	287.292	336.32	282.982	263.825	234.63	222.901	323.297	217.563	268.674
1110004F10Rik	1223.65	1145.85	1181.61	952.616	1239.3	1126.9	1134.3	1063.6	1078.97	980.934	1098.24	1099.09	1152.22	1131.21	1142.38	1113.57
1110006O24Rik	3.24558	3.04334	2.97098	14.2516	16.5454	4.37774	6.51989	14.6299	8.14212	10.8922	7.48166	7.32238	8.74718	17.413	12.5544	9.80229
1110008L16Rik	194.512	169.633	189.496	132.633	146.406	141.911	106.782	137.004	149.178	103.812	139.901	112.83	137.106	127.392	131.402	141.317
1110008P14Rik	305.441	256.768	350.787	336.084	345.674	407.319	381.067	379.112	301.863	253.322	311.576	200.903	340.675	332.065	332.723	316.061
1110012L19Rik	301.003	312.567	390.891	279.321	284.118	336.803	287.14	283.872	272.077	354.623	367.249	271.701	240.782	247.492	206.464	163.912
1110015O18Rik	0	0	0	0	0	0	0	0	0	0	0	0	0	0	0	0
1110017D15Rik	4.76566	0.880726	2.90243	0	1.15282	2.76931	0	0	1.75491	12.1714	4.28644	0	1.12066	1.70679	0.723564	1.11869
1110019D14Rik	89.1535	106	74.8034	63.9703	76.7177	92.9252	94.968	59.7642	69.6818	77.8602	97.4505	57.3623	61.1867	57.3331	106.485	79.5416
1110020A21Rik	10.2722	13.5466	10.6988	9.18156	8.95154	12.6772	15.0734	10.1406	19.9447	10.4573	13.0382	7.92474	20.2085	18.132	29.4759	23.351
1110025L11Rik	0	0	0	0	0	0	0	0	0	0	0	0	0	0	0	0
1110028F11Rik	0	0	0	0	0.778683	0	0	0	0	0	0	0	0	0	0	0
1110028F18Rik	0	0	0	0	0	0	0	0	0	0	0	0	0	0	0	0
1110032A03Rik	395.589	380.874	415.266	362.374	314.316	294.927	379.167	382.77	345.461	340.244	342.004	365.529	367.149	294.089	280.005	346.76
1110032F04Rik	19.6398	50.9035	9.11373	7.37442	150.037	31.8073	15.8349	8.07312	20.1304	10.464	16.5126	30.4068	49.765	24.3955	47.2516	49.5636
1110036E04Rik	0	0	0	0	0	0	0	0	0	0	0	0	0	0	0	0
1110038B12Rik	51.9209	61.4908	72.4026	66.4296	84.8591	87.5611	59.3819	50.852	49.3276	52.7143	60.4317	34.959	50.9282	36.1304	74.8637	54.1361
1110038F14Rik	234.008	227.444	318.917	281.925	269	281.933	249.578	280.107	259.876	256.416	241.523	253.704	278.394	263.147	250.011	214.601
1110046J04Rik	12.7172	16.8856	17.8408	25.9098	34.1423	31.4916	23.9345	14.9032	22.8974	24.2806	21.9582	22.4152	41.6927	15.9561	39.3392	20.6955
1110051M20Rik	374.966	294.387	370.635	290.427	296.612	284.268	332.862	310.725	257.461	308.906	248.815	287.822	270.681	275.049	235.989	275.52
1110058D11Rik	0	0	0	1.03761	1.56351	0	0	0	0	0	0	0	0	0	0	0
1110059E24Rik	280.242	273.499	269.112	245.372	293.073	321.92	242.684	253.762	270.972	242.167	317.308	255.747	291.451	293.025	179.499	230.197
1110059G10Rik	256.81	287.37	292.667	231.661	267.596	297.497	269.225	219.898	253.583	273.682	264.246	231.836	312.694	232.353	190.721	224.651
1110065P20Rik	234.457	239.459	244.908	246.051	265.173	248.859	259.582	274.342	256.487	174.08	212.814	215.846	246.509	269.603	298.336	232.719
1190002N15Rik	1660.76	1814.38	1421.38	1462.21	1813.81	1605.34	1576.26	1376.37	1507.76	1480.56	1408.87	1627.11	1501.81	1426.67	1399.57	1359.46
1190005I06Rik	12.8623	4.05958	2.96929	12.1316	1.5706	21.8755	3.73037	0	0	8.83087	0	0	15.4647	0	8.01285	12.8713
1190007I07Rik	132.162	115.587	107.349	108.228	92.9299	148.911	127.597	131.955	105.556	142.41	151.631	112.186	167.554	130.003	95.6459	92.2032
1190028D05Rik	0	0	0	0	0	0	0	0	0	0	0	0	0	0	0	0
1300002E11Rik	234.327	216.033	180.985	187.914	252.441	277.336	204.747	243.875	176.21	234.523	243.566	198.246	171.02	182.989	173.564	225.829
1300017J02Rik	3.18308	0	0	1.03749	2.34083	4.32129	5.75208	0	0	0.97868	0.951483	0	1.08868	7.5277	1.15669	0.998921
1500004A13Rik	19.0085	17.8091	16.7992	22.9101	24.8866	23.6553	17.4187	10.344	20.3253	29.2709	12.421	17.1132	17.367	20.0692	18.6028	40.9762
1500009C09Rik	0	4.0014	0	2.08203	0	0	1.92206	0	2.27772	0.972868	3.80045	0	0	0	0	0
1500009L16Rik	26.6576	44.5468	48.2875	67.9322	65.4833	50.9119	64.7666	58.6037	43.1188	43.7006	26.3071	48.1229	39.3822	31.2886	33.3297	40.2322
1500011B03Rik	79.6045	65.3509	89.4252	57.3475	97.3057	85.2406	63.2419	57.6733	50.0288	58.2824	84.144	77.9067	106.453	53.8182	55.2565	53.7576
1500011K16Rik	391.743	312.93	401.03	280.93	310.403	366.389	386.497	307.055	342.204	326.722	422.012	299.832	313.264	357.127	380.694	341.268
1500012K07Rik	0	0	0	0	0	0	0	0	0	0	0	0	0	0	0	0
1500015A07Rik	61.2507	39.1118	54.9235	27.3661	46.116	37.3705	32.4659	42.952	42.5337	49.8779	36.7164	38.6078	36.6915	31.679	31.6954	38.6313
1500015L24Rik	0	0	0	0	0	0	0	0	0	0	0	0	0	0	0	0
1500015O10Rik	21.3168	79.2893	55.4536	61.6297	423.441	265.136	214.132	61.3341	19.5922	41.9047	30.2889	44.0705	434.732	168.599	288.356	276.823
1500026H17Rik	29.1663	22.5267	41.0271	35.7391	27.6748	33.132	45.1391	15.0257	30.382	38.5005	27.8971	14.2911	28.1604	19.2211	24.5619	33.4958
1600002D24Rik	0	0	0	0	0	0	0	0	1.13036	0	0	0	0	0	0	0
1600002K03Rik	27.8694	77.4568	52.5635	60.5832	91.5768	55.7309	102.177	44.2979	36.9988	57.7867	42.4726	47.1006	60.4501	59.417	92.575	60.9205
1600010M07Rik	4.25979	6.96713	4.95738	17.5882	7.77435	4.35445	5.69259	17.1813	3.43851	2.92931	3.80252	1.80469	5.49038	11.7269	5.76609	4.91013
1600012H06Rik	596.798	605.182	521.625	570.209	717.167	599.291	717.086	552.149	547.498	513.065	521.436	503.737	560.433	565.588	574.973	634.829
1600014C10Rik	979.574	924.54	1144.89	999.699	649.663	939.981	875.296	998.91	809.134	768.634	829.22	792.251	702.631	914.34	729.933	766.704
1600014C23Rik	0	6.06833	1.99156	3.07507	2.35693	7.71059	3.74453	7.94349	0	10.7798	1.88239	0	1.1043	4.18738	6.86551	0
1600015I10Rik	2.11949	0.991819	0.98369	1.03801	1.55965	0	0	6.88811	1.13351	1.95836	0	0.901274	0	7.5599	3.47934	1.98577
1600019K03Rik	0	0	0	0	0	0	0	0	0	0	0	0	0	0	0	0
1600020E01Rik	34.8322	45.0307	50.792	56.9786	52.5265	32.9025	40.4525	28.7838	25.0229	37.117	30.9363	50.541	37.602	29.524	45.2324	52.1121
1600023N17Rik	1.05852	4.98591	0	3.09219	0.777868	7.59255	0	1.13844	0	2.91428	0	8.07803	1.09704	0.84034	1.15798	3.97523
1600025M17Rik	0	0	0	0	0	0	0	0	0	0	0	0	0	0	0	0
1600027J07Rik	0	0	0	0	0	0	0	0	0	0	0	0	0	0	0	0
1600029I14Rik	0	0	0	0	0	0	0	0	0	0	0	0	0	0	0	0
1600029O15Rik	6.29062	0.983717	0	1.05013	1.54902	4.2939	0	3.48153	0	2.90379	0.961798	3.60349	1.08028	3.33522	0	3.02086
1700001C02Rik	8.5707	8.97308	3.9506	0	0	6.50242	2.83588	4.56286	6.82097	8.85849	2.81923	3.63911	0	0.828616	0	0
1700001C19Rik	1.96923	0.922493	10.0361	0	2.89091	1.30754	5.30694	2.77179	3.64328	6.27549	3.11312	3.69909	1.16709	0.895667	1.23788	3.17004
1700001D01Rik	0	0	0	0	0	0	0	0	0	0	0	0	0	0	0	0
1700001F09Rik	0	0	0	0	0	0	0	0	0	0	0	0	0	0	0	0
1700001G01Rik	0	0	0	0	0	0	0	0	0	0	0	0	0	0	0	0
1700001G11Rik	5.33221	1.00142	3.95516	4.11899	3.12746	2.18312	2.83611	1.13981	4.58707	9.72873	4.72805	4.48858	0	0.837002	0	0
1700001G17Rik	5.35627	2.0216	1.98599	3.07736	4.72026	0	2.83718	2.26787	1.15127	0	3.74884	8.96237	4.36762	0.833132	0	0
1700001J03Rik	3.18531	2.97291	2.94953	2.0666	6.99689	1.08337	0	0	1.13771	17.592	6.65841	4.5071	10.9571	0.837759	0	8.8424
1700001J11Rik	0	0	0.988354	0	0	3.22301	0	0	1.13485	0	0	0	0	0	0	0.999792
1700001K19Rik	3.16114	0	0	0	0	0	0	0	0	0	0	0	0	0	0	0
1700001K23Rik	0	0	0	0	0	0	0.968483	0	0	0	0	0	0	0	1.16301	0
1700001L05Rik	39.8584	20.7094	35.7366	36.5504	17.802	18.2551	35.0916	17.2661	25.9846	12.5814	20.143	10.7328	20.6338	20.9419	23.3138	31.165
1700001L19Rik	1.04856	0	1.99897	0	0.773564	0	0	0	0	4.84867	0	2.70515	4.34652	0	0	0
1700001O22Rik	2.80585	2.45881	0	3.50558	5.43329	2.66037	2.30711	3.85494	8.42201	0	10.0351	10.7208	0	1.06427	0	2.64381
1700001P01Rik	0	0.991997	0	0	0	0	0	0	1.13054	0.975146	0	1.80309	0	0	0	0
1700003C15Rik	0	0	0	0	0	0	0	0	0	0	0	0	0	0	0	0
1700003D09Rik	0	0	0	0	0	0	0	0	0	3.90573	0	0.900502	0	0	0	0
1700003E16Rik	7.48664	21.2682	16.8196	6.12	12.5992	8.73328	9.45187	4.50365	8.12426	11.7323	2.82071	6.31014	13.1335	1.67324	5.73042	2.97244
1700003E24Rik	0	0	0	0	0	1.07466	0	0	0	0	0	0	0	0	0	0
1700003F12Rik	1.09241	2.03435	0.981932	0	2.33673	6.48369	0	3.23792	0	0.993206	0	0.93626	2.18594	5.69177	2.23028	0
1700003G13Rik	0	0	0	0	0	0	0	0	0	0	0	0	0	0	0	0
1700003G18Rik	0	0	0	0	0	0	0.968483	0	0	0	0	0	0	1.65052	0	2.02863
1700003H04Rik	0	0	0	0	0	0	0	0	0	0	0	0	0	0	0	0
1700003I22Rik	0	0	0	0	0	0	0	0	0	0	0	0	0	0	0	0
1700003L19Rik	0	0	0	0	0	0	0	0	0	0	0	0	0	0	0	0
1700003M07Rik	6.69707	29.2327	13.4934	10.9303	25.9218	9.22477	19.2201	15.2415	18.9886	5.03244	9.82452	16.6956	10.1221	7.7651	13.1479	12.8717
1700003P14Rik	0	0	0	0	0	0	0	0	0	0	0	0	0	0	0	0
1700006A11Rik	0	0	0	0	0	0	0	0	0	0	0	0	0	0	0	0
1700006F04Rik	0	0	0	0	0	0	0	0	0	0	0	0	0	0	0	0
1700006H21Rik	0	0	0	0	0	0	0	0	0	0	0	0	0	0	0	0
1700007F19Rik	0	0	0	0	0	0	0	4.58753	0	0	0	0	0	0	0	0
1700007J10Rik	0	0	0	0	0	0	0	0	0	0	0	0	0	0	0	0
1700007K13Rik	0	0	4.96779	0	8.61569	2.17979	1.90197	2.27722	1.14896	0.976784	0	0	4.36849	0	2.29801	2.95789
1700007L15Rik	36.2246	30.0045	33.69	21.632	21.0541	30.4848	33.2731	41.0099	29.9115	19.5097	18.0179	40.5615	29.5794	25.0951	29.9861	20.713
1700007P06Rik	0	0	0	0	0	0	0	0	0	0	0	0	0	0	0	0
1700008C04Rik	0	0	0	0	0	0	0	0	0	0	0	0	0	0	0	0
1700008J07Rik	74.4209	71.2005	72.7462	61.5987	52.4511	68.5196	64.0546	52.4912	38.6353	71.2898	69.8318	77.2467	95.7695	48.5904	63.9583	70.3538
1700008K24Rik	0	0	0	0	0	0	0	0	0	0	0	0	0	0	0	0
1700008O03Rik	5.3603	1.01407	1.97473	3.02721	1.56789	2.18351	0	2.22761	1.17323	17.6235	5.60825	1.81173	0	0.83285	0	0.982264
1700008P02Rik	0	0	0	0	0	0	0	0	0	0	0	0	0	0	0	0
1700009C05Rik	0	0	0	0	0	0	0	0	0	0	0	0	0	0	0	0
1700009J07Rik	0	0	0	0	1.55737	0	0	0	1.13674	0	0	0	0	0	4.62594	0
1700009N14Rik	0	0	0	0	3.10608	1.07765	0	0	0	0	0	0	0	0	0	1.00376
1700010B08Rik	0	0	0	0	0	0	0	0	0	0	0	0	0	0	0	0
1700010D01Rik	0	0	0	0	0	0	0	0	0	0	0	0	0	0	0	0
1700010I02Rik	0	0	0	0	0	0	0	0	0	0	0	0	0	0	0	0
1700010I14Rik	19.9222	11.7943	17.7588	16.649	18.5536	21.9932	6.77428	27.5732	11.0986	8.63345	20.6849	2.85756	20.3105	23.0757	14.9435	17.7942
1700010J16Rik	0	0	0	0	0	0	0	0	0	0	0	0	0	0	0	0
1700010K23Rik	0	0	0	0	0	0	0	0	0	0	0	0	0	0	0	0
1700010N08Rik	0	0	0.989715	0	0	0	0	1.14496	0	0	0	0	0	0	0	0
1700011B04Rik	0	0	0	6.25022	0	0	0	0	0	0	0	0	0	0	0	0
1700011C11Rik	0	0	0	0	0	0	0	0	0	0	0	0	0	0	0	0
1700011L22Rik	0	0	0	0	0	0	0	0	1.13036	0	0	0	0	0	0	0
1700011M02Rik	0	0	0	0	0	0	0	0	0	0	0	0	0	0	0	0
1700012A03Rik	0	0	0	0	0	0	0	0	0	0	0	0	0	0	0	0
1700012B07Rik	0	0	0	1.0417	0	0	0	0	0	1.23044	0	0	0	0.659974	0	0
1700012B09Rik	0	0	0	0	0	0	0	0	0	0	0	0	0	0	0	0
1700012C14Rik	0	0	0.995098	0	0.773175	0	0	0	0	0	0	0	0	0	0	0
1700012D01Rik	45.1397	38.3043	23.0955	25.1646	23.0806	16.0925	35.7329	40.4474	24.8011	27.192	34.3134	26.3519	58.3406	29.7755	51.3281	33.3865
1700012D14Rik	2.12283	4.99841	8.04594	5.16272	13.9789	7.60896	1.89119	1.13691	6.93023	1.94306	11.324	17.1616	8.74722	1.66395	2.29358	12.0263
1700012D16Rik	2.10742	0	0	0	0	0	0	0	0	0	0	0	0	0	0	0
1700012H19Rik	0	0	0	0	0	0	0	0	0	0	0	0	0	0	0	0
1700012I11Rik	0	0	0	0	0	0	0	0	0	0	0	0	0	0	0	0
1700012P22Rik	0	0	0	0	0	0	0	0	0	0	0	0	0	0	0	0
1700013D24Rik	0	0	0	0	0	0	0	0	0	0	0	0	0	0	0	0
1700013F07Rik	0	0	0	0	0	0	0	0	0	0	0	0	0	0	0	0
1700013G24Rik	0	0	0	0	0	0	0	0	0	0	0	0	0	0	0	0
1700013H16Rik	0	0	0	0	0	0	0	0	0	0	0	0	0	0	0	0
1700015F17Rik	0	0.989221	0	0	0.774625	1.08332	0	0	0	0.966016	0	1.81321	1.08493	0	0	0
1700015G11Rik	0	0	0	0	0	0	0	0	0	0	0	0	0	0	0	0
1700016A09Rik	3.31228	0	0.993052	0	0	1.08802	0	1.07566	0	0	1.84443	4.66203	4.34117	0	0	0
1700016C15Rik	0	0	0	0	0	0	0	0	0	0	0	0	0	0	0	0
1700016D06Rik	0	0	0	0	0	0	0	0	0	0	0	0	0	0	0	0
1700016G22Rik	0	0	0	0	0	0	0	0	0	0	1.92315	0	0	0	0	7.9867
1700016H13Rik	0	1.99842	0.990085	2.06413	0	0	0	0	0	0	0	0	0	3.37235	0	1.98574
1700016K05Rik	0	0	0	0	0	0	0	0	0	0	0	0	0	0	0	0
1700016K19Rik	0	0	0	0	0	0	0	0	0	0	0	0	0	0	0	0
1700016L04Rik	0	0	0	0	0	1.07555	0	4.5837	0	0	0.960736	0.898881	0	0	0	0
1700016L21Rik	0	0	0	0	0	0	0	0	0	0	0	0	0	0	0	0
1700016P04Rik	0	0	0	0	0	0	0	0	0	0	0	0	0	0	0	0
1700017B05Rik	247.808	312.812	331.977	421.168	357.602	359.73	382.104	432.098	294.737	277.716	304.241	298.09	309.447	295.363	382.493	293.195
1700017D01Rik	0	0	0	0	0	0	0	0	0	0	0	0	0	0	0	0
1700017G19Rik	0	0	0	0	0	0	0	0	0	0	0	0	0	0	0	0
1700017J07Rik	0	0	0	0	0	0	0	0	0	0	0	0	0	0	0	0
1700017L05Rik	0	0	0	0	0	0	0	0	0	0	0	0	0	0	0	0
1700017N19Rik	0	0	0	0	0	0	0	0	0	0	0	0	0	0	0	0
1700018A04Rik	0	0	0	0	0	0	0	0	0	0	0	0	0	0	0	0
1700018B08Rik	0	0	0	0	0.778683	0	0	0	0	0	0	0	0	0	0	0
1700018B24Rik	0	0	0	0	0	0	0	0	0	0	0	0	0	0	0	0
1700018F24Rik	0	0	0	0	0	0	0	0	0	0	0	0	0	0	0	0
1700018G05Rik	0	0	0	0	0	0	0	0	0	0	0	0	0	0	0	0
1700018L02Rik	12.0044	6.10041	24.8983	9.17788	11.8136	9.78013	5.59746	20.0057	10.5617	13.805	9.44838	19.489	9.80881	13.1163	2.2654	14.6077
1700019A02Rik	0	2.97599	0	0	0	0	0	0	0	0	0	0	0	0	0	0
1700019C18Rik	0	3.95626	0	2.07147	0	1.08803	0	1.14269	3.45775	0.967952	0.947535	0.900585	1.10389	0	0	0.98109
1700019D03Rik	28.8407	15.9982	28.7591	23.7282	16.3926	40.1106	35.1889	35.2503	25.2501	34.2075	12.3523	21.7853	16.3669	22.4618	21.8608	18.8034
1700019E08Rik	0	0	0	0	0	0	0	0	0	0	0	0	0	0	0	0
1700019G24Rik	0	0	0.988059	0	0	0	0	0	0	0	0.95638	0	0	0	0	0
1700019M22Rik	0	0	0	0	0	0	0	0	0	0	0	0	0	0	0	0
1700019N19Rik	0	0	0	2.08341	0	0	0	0	0	0	0	0	0	0	0	0
1700019P21Rik	0	0	0	0	0	0	0	0	0	0	0	0	0	0	0	0
1700020A23Rik	1.05371	0	0	0	0	0	0	0	0	0	0	0	0	0	0	0
1700020D05Rik	25.5649	31.9745	17.77	23.7235	34.4213	18.4841	21.8661	6.8459	17.1554	13.6913	20.8752	24.3434	13.144	21.7984	16.1265	19.7592
1700020D14Rik	0	0	0	0	0	0	0	0	0	0	0	0	0	0	0	0
1700020G17Rik	0	0	0	0	0	0	0	0	0	0	0	0	0	0	0	0
1700020I14Rik	1614.1	1576.79	1221.01	1529.13	1629.12	1553.48	1681.12	1637.07	1412.1	1403.62	1520.04	1534.77	1321.62	1705.08	1625.61	1598.38
1700020L24Rik	6.40319	0	2.92672	0	0	0	0	0	0	0	0	0	0	0	0	1.00376
1700020M21Rik	2.09177	0	0	0	0	0	0	1.15546	0	0	0	0	0	0	0	0
1700020N01Rik	0	0	0	0	0.778683	0	0	0	0	0	0	0	0	0	0	0
1700020N15Rik	0	0	0	0	0	0	0	0	0	0	0	0	0	0	0	0
1700020N18Rik	0	0	0	0	0	0	0	0	0	0	0.95638	0	0	0	0	0
1700021F02Rik	0	0	0	0	0	0	0	0	0	0	0	0	0	0	0	0
1700021F05Rik	729.766	791.752	792.573	595.14	602.745	692.672	683.825	629.219	808.803	605.658	692.475	556.159	636.898	703.616	582.618	536.727
1700021F07Rik	0	0	0	0	0	0	0	0	0	0	0	0	0	0	0	0
1700021N21Rik	0	0	0	0	0	0	0	0	0	0	0	0	0	0	0	0
1700022A21Rik	0	0	0	0	0	0	0	0	0	0	0	0	0	0	0	0
1700022A22Rik	0	0	0	0	0	0	0	0	0	0	0	0	0	0	0	0
1700022E09Rik	0	0	0	0	0	0	0	0	0	0	0	0	0	0	0	0
1700022H01Rik	1.06683	0.998129	0	2.06338	0	2.176	0.948154	0	0	0.978547	0	3.61548	4.39454	1.6772	2.30516	4.92442
1700022H16Rik	1.05371	0	0	0	0	0	0	0	0	0	0	0	0	0	0	0
1700022I11Rik	0	0	0	0	0	0	0	0	0	0	0	0	0	0	0	0
1700023C21Rik	0	0	0	0	0	0	0	0	0	0	0	0	0	0	0	0
1700023D09Rik	1.83141	2.58476	4.25908	1.7565	4.68063	3.75372	2.40672	3.36566	0	6.83831	1.89288	7.2367	6.62942	0	0	0.987069
1700023F02Rik	0	0	0	1.0575	0	0	0.954012	0	0	0	0	0	0	0	0	0
1700023F06Rik	2.16181	3.03899	13.8378	13.264	7.87741	5.44473	3.74909	9.01094	1.16143	2.97666	4.68508	9.17128	0	4.14557	3.43691	1.96749
1700024B18Rik	0	0	0	0	0	0	0	0	0	0	0	0	0	0	0	0
1700024F13Rik	0	1.0028	0	5.20923	0	0	0.957919	0	0	0	0	0	0	0	2.32602	0
1700024G13Rik	0	0	0	0	0	0	0	0	0	0	0	0	0	0	0	0
1700024I08Rik	0	0	0	0	0	0	0	0	0	0	0	0	0	0	0	0
1700024N05Rik	0	0	0	0	0	0	0	0	0	0	0	0	0	0	0	0
1700024P04Rik	0	0	0	0	0	0	0	0	0	0	0	0	0	0	0	0
1700025B11Rik	0	0.991997	0	0	0	0	0	0	0	0	0	0	0	0	0	0
1700025C18Rik	0	0	0	0	0	0	0	0	0	0	0	0	0	0	0	0
1700025F22Rik	0	0	0	0	0	0	0	0	0	0	0	0	0	0	0	0
1700025F24Rik	0	0	0	0	0	0	0	0	0	0	0	0	0	0	0	0
1700025G04Rik	2373.56	2628.71	2202.65	2922.91	2284.81	2479.48	3170.09	3768.34	2386.29	2028.75	2296.46	1908.24	2657.54	2490.2	2450.77	2356.51
1700025J12Rik	0	0	0	0	0	0	0	0	0	0	0	0	0	0	0	0
1700025K24Rik	0	0	0	0	0	0	0	0	0	0	0	0	0	0	0	0
1700025M24Rik	0	0	0	0	0	0	0	0	0	0	0	0	0	0	0	0
1700025N23Rik	1.06191	0.993254	0.985923	0	0	1.08398	1.90718	0	0	0	0.954976	0.904303	0	0	0	0
1700026D11Rik	0	0	0	0	0	0	0	0	0	0	0	0	0	0	0	0
1700026F02Rik	0	0	0	0	0	0	0	0	0	0	0	0	0	0	0	0
1700026J14Rik	0	0	0	0	3.91285	2.17633	1.9037	1.14671	0	0.983729	3.79655	0	1.09474	1.67307	0	1.97041
1700027A15Rik	0	0	0	0	0	0	0	0	0	0	0	0	0	0	0	0
1700027F06Rik	0	0	0	0	0	0	0	0	0	0	0	0	0	0	0	0
1700027F09Rik	0	0	0	0	0	0	0	0	0	0	0	0	0	0	0	0
1700027H10Rik	0	0	0	0	0	0	0	0	0	0	0	0	0	0	0	0
1700027I24Rik	0	0	0	0	0	0	0	0	0	0	0	0	0	0	0	0
1700027J07Rik	0	0	0	2.08341	0	0	0	0	0	0	0	0	0	0	0	0
1700028B04Rik	0	0	0	0	0	0	0	0	0	0	0	0	0	0	0	0
1700028D13Rik	0	0	0	0	0	0	0	0	0	0	0	0	0	0	0	0
1700028E10Rik	0	0	1.51169	2.3795	1.16335	1.87222	3.70814	1.97581	4.11993	1.50994	1.51226	0	3.92871	0.656131	6.43004	1.5909
1700028I16Rik	0	0	0	0	1.55737	0	0	0	0	0	0	0	0	0	0	0
1700028J19Rik	30.9721	20.9162	52.2613	36.2166	5.47259	6.4865	10.4841	20.5874	27.2683	16.7553	24.6347	16.3672	17.4164	18.3485	6.93955	5.92286
1700028K03Rik	0	0	0	0	0	0	0.968483	0	0	0	0	0	5.38198	2.51167	0	0
1700028M03Rik	0	0	0	0	0	0	0	0	0	0	0	0	0	0	0	0
1700028P14Rik	0	0	0	0	0	0	0	0	0	0	0	0	0	0	0	0
1700028P15Rik	0	0	0	0	0	0	0	0	0	0	0	0	0	0	0	0
1700029B22Rik	0	0	0	0	0	0	0	0	0	0	0	0	0	0	0	0
1700029F12Rik	0	0	0	0	0	0	0	0	0	0	0	0	0	0	0	0
1700029H14Rik	0	0	0	0	1.6242	0	0	1.09969	0	0	0	0	0	0.807972	2.40077	0
1700029I15Rik	0	4.12632	1.01126	0	0	0	2.76356	5.66451	0	0.966847	0	0.899519	2.18508	0	0	0
1700029J03Rik	0	0	0	0	0	0	0	0	0	0	0	0	0	0	0	0
1700029J07Rik	100.718	104.913	63.1647	105.748	140.473	86.8502	52.5823	88.1355	104.026	91.5522	95.5776	72.0118	106.03	76.819	71.3976	79.9916
1700029M20Rik	0	0	0	0	0	0	0	0	0	0	0	0	0	1.66788	0	0
1700029N11Rik	0	0	0	0	0	0	0	0	0	0	0	0	0	0	0	0
1700029P11Rik	0	0	0	0	0	0	0	0	0	0	0	0	0	0	0	0
1700030A11Rik	0	0	0	0	0	0	0	0	0	0	0	0	0	0	0	0
1700030C10Rik	81.1678	60.0849	95.8512	72.1156	127.514	49.8855	85.717	68.2021	81.4485	63.6204	96.9142	72.4113	61.1031	50.055	58.6953	54.3684
1700030C14Rik	0	0	0	0	0	0	0	0	0	0	0	0	0	0	0	0
1700030F04Rik	0	0	0	0	0	0	0	0	0	0	0	0	0	0	0	0
1700030F18Rik	0	0	0.988059	0	0	0	0	0	0	0	0	0	0	0	1.16301	0
1700030J22Rik	4.29685	16.1329	6.74538	21.2421	10.2818	18.9108	5.87526	5.82052	5.79359	10.5181	7.46872	9.19453	9.54388	13.1139	8.29331	6.1266
1700030K09Rik	158.563	176.988	131.911	138.881	155.504	166.149	148.695	152.322	162.023	148.421	147.325	163.909	167.414	132.01	119.396	118.899
1700030L20Rik	0	0	0	0	0	0	0	0	0	0	0	0	0	0	0	0
1700030M09Rik	0	0	0	0	0	0	0	0	0	0	0	0	0	0	0	0
1700030N03Rik	0	0	0	0	0	0	0	0	0	0	0	0	0	0	0	0
1700030O20Rik	0	0	0	0	0	0	0	0	0	0	0	0	0	0	0	0
1700031A10Rik	0	0	0	0	0	0	0	0	0	0	0	0	0	0	0	0
1700031F05Rik	0	1.98399	0	0	0	0	0	0	0	0	0	0	0	0	0	0
1700031L13Rik	0	0	0	0	0	0	0	0	0	0	0	0	0	0	0	0
1700031M16Rik	0	0	0	0	0	0	0	0	0	0	0	0	0	0	0	0
1700031P21Rik	0	0	0	0	0	0	0	0	0	0	0	0	0	0	0	0
1700034E13Rik	0	0	0	0	0	0	0	0	0	0	0	0	0	1.66788	0	0
1700034G24Rik	0	0	0	0	0	0	0	0	0	0	0	0	0	0	0	0
1700034H15Rik	5.27586	5.94379	5.93393	2.08033	10.8955	7.5345	4.83755	4.58985	4.52366	3.89327	6.69248	3.59876	3.25915	6.69328	8.13148	1.0003
1700034I23Rik	4.18268	2.94661	6.03352	0	0	0	0	0	0	2.88189	5.80196	6.27588	3.24265	0	2.34808	0
1700034J05Rik	0	0	0	0	0	0	0	0	0	0	0	0	0	0	0	0
1700034K08Rik	0	0	0	0	0	0	0	0	0	0	0	0	0	0	0	0
1700034P13Rik	0	0	0.997107	0	0	1.07547	0.958964	0	0	0.968895	0	0	0	0	0	1.0088
1700036G14Rik	0	0	0	0	0	0	0	0	0	0	0	0	0	0	0	0
1700037C18Rik	92.0188	86.7594	68.6091	68.9146	55.1612	60.5778	63.5971	44.7749	91.796	69.9082	91.8931	68.1219	47.4309	47.0179	48.8722	67.2654
1700037H04Rik	182.158	202.019	210.92	281.717	247.08	208.531	235.198	240.9	212.952	190.623	215.648	205.15	204.744	194.669	180.063	155.419
1700039E22Rik	0	0	0	0	0	0	0	0	0	0	0	0	0	0	0	0
1700039M10Rik	0	0	0	0	0	0	0	0	0	0	0	0	0	0	0	0
1700040D17Rik	7.25913	10.7061	5.00481	9.5125	3.06838	2.12302	4.93796	3.49361	10.0452	0.961995	0	2.7113	1.07341	4.14635	1.17913	4.1064
1700041A01Rik	0	0	0	0	0	0	0	0	0	0	0	0	0	0	0	0
1700041C23Rik	0	0	0	0	0	0	0	0	0	0	0	0	0	0	0	0
1700041M19Rik	0	0	0	0	0	0	0	0	0	0	0	0	0	0	0	0
1700042G07Rik	0	0	0	0	0	0	0	0	0	0	0	0	0	0	0	0
1700042G15Rik	0	0	0	0	0	0	0	0	0	0	0	0	0	0	0	0
1700042O10Rik	0	0	0	0	0	0	0	0	0	0	0	0	0	0	0	0
1700044C05Rik	0	0	0	0	0	0	0	0	0	0	0	0	0	0	0	0
1700044K03Rik	0	0	0	0	0	0	0	0	0	0	0	0	0	0	0	0
1700045H11Rik	0	0	0	0	0	0	0	0	0	0	0	0	0	0	0	0
1700046C09Rik	0	0	0	0	0	0	0	0	0	0	0	0	0	0	0	0
1700047A11Rik	0	0	0	0	0	0	0	0	0	0	0	0	0	0	0	0
1700047E10Rik	0	0	0	0	0	0	0	0	0	0	0	0	0	0	0	0
1700047G03Rik	0	0	0	0	0.778683	0	0	0	0	0	0	0	0	0	0	0
1700047I17Rik2	435.171	461.439	445.277	495.778	525.554	496.365	517.711	468.934	389.452	424.528	370.494	376.853	446.718	442.632	497.93	377.103
1700047L14Rik	0	0	0	0	0	0	0	0	0	0	0	0	0	0	0	0
1700047M11Rik	10.6706	0.994277	4.93858	3.10915	0	3.25983	0.948433	4.58954	2.28077	6.85961	4.75425	6.33369	6.5827	1.67514	2.30347	3.93105
1700048M11Rik	0	0	0	0	0	0	0	0	0	0	0	0	0	0	0	0
1700048O20Rik	19.9892	24.6516	17.8689	20.8875	32.5282	9.67856	23.2683	26.4829	13.568	0.969809	17.2513	21.4898	18.5266	10.062	18.582	13.0176
1700049E15Rik	0	0	0	0	0	0	0	0	0	0	0	0	0	0	0	0
1700049E17Rik1	0	0	0.988059	0	0	0	0	0	0	2.79155	0.984993	0	0	0.81606	1.20759	0
1700049E17Rik2	0	0	1.00883	0	2.19377	0	2.02012	0	0	2.73301	0.964339	0	0	0	1.18227	1.04672
1700049E22Rik	0	0	0	0	0	0	0	0	0	0	0	0	0	0	0	0
1700049L16Rik	0	0	0	0	0	0	0	0	0	0	0	0	0	0	0	0
1700051A21Rik	0	0	0	0	0	1.07466	0	0	0	0	0	0	0	0	0	0
1700052I22Rik	0	0	0	0	0	0	0	0	0	0	0	0	0	0	0	0
1700052K11Rik	118.047	100.928	135.2	75.3752	97.4537	100.501	81.5833	77.0874	133.376	114.725	105.843	86.5937	67.6046	84.2036	114.128	94.2809
1700054A03Rik	0	0	0	0	0	0	0	0	0	0	0	0	0	0	0	0
1700054K19Rik	0	0	0	0	0	0	0	0	0	0	0	0	0	0	0	0
1700054M17Rik	0	0	0	0	0	0	0	0	0	0	0	0	0	0	0	0
1700055C04Rik	0	0	0	0	0	0	0	0	0	0	0	0	0	0	0	0
1700055D16Rik	9.42809	9.80749	3.85157	10.3133	15.1003	6.23703	9.0138	9.27942	11.6177	4.65858	12.6586	9.03761	3.51705	14.0578	3.36752	8.04522
1700056E22Rik	13.2941	2.06073	15.0404	5.04208	5.53341	5.45866	11.9177	6.57076	8.37834	10.8606	14.0904	21.586	12.0235	8.94371	4.46662	9.67206
1700057G04Rik	0	0	0	0	0	0	0	0	0	0	0	0.902975	0	0	0	0
1700057H15Rik	0	0	0	0	0	0	0	0	0	0	0	0	0	0	0	0
1700057H21Rik	0	0	0	0	0	0	0	0	0	0	0	0	0	0	0	0
1700060C16Rik	0	0	0	0	0	0	0	0	0	0	0	0	0	0	0	0
1700060C20Rik	0	0	0	0	0	0	0	0	0	0	0	1.80595	0	0	0	0
1700061F12Rik	0	0	0	0	0	0	0	0	0	0	0	0	0	0	0	0
1700061G19Rik	4.25528	2.99013	2.95583	1.03453	5.47329	3.24314	9.57615	1.14308	5.686	1.961	3.80121	1.8067	2.17886	3.34735	5.78202	0.990937
1700061I17Rik	0	0.990081	0	4.16844	0.775864	1.08023	0	0	0	1.9326	0	0	0	4.20188	0	0
1700061J23Rik	0	0	0	0	0	0	0	0	0	0	0	0	0	0	0	0
1700061N14Rik	0	0	0	0	0	0	0	0	0	0	0	0	0	0	0	0
1700063A18Rik	0	0	0	0	0	0	0	0	0	0	0	0	0	0	0	0
1700063D05Rik	0	0	0	0	0	0	0	0	0	0	0	0	0	0	0	0
1700063H04Rik	0	0	0	0	0	0	0	0	0	0	0	0	0	0	0	0
1700063O14Rik	0	0	0	0	0	0	0	0	0	0	0	0	0	0	0	0
1700064J06Rik	0	0	0	0	0	0	0	0	0	0	0	0	0	0	0	0
1700064M15Rik	1.05865	0	0	0	2.32514	0	0	0	0	0	0.95638	0	0	0	0	0
1700065D16Rik	0	0	0	0	0	0	0	2.29376	0	0	0	0	0	0	0	0
1700065I16Rik	0	0	0	0	0	0	0	0	0	0	0	0	0	0	0	0
1700065J11Rik	0	0	1.97612	0	0	0	0	0	0	0	0	0	0	0	0	0
1700065J18Rik	0	0	0	0	0	0	0	0	0	0	0	0	0	0	0	0
1700065L07Rik	0	0	0	0	0	0	0	0	0	0	0	0	0	0	0	0
1700065O20Rik	0	0	0	0	0	0	0	0	0	0	0	0	0	0	0	0
1700066B17Rik	2.11729	0.987262	5.95856	5.1827	0	0	0	0	1.1362	0	0	0.902224	0	0.83034	0	0
1700066B19Rik	4.24804	2.99845	0.987711	0	2.3462	0	0.956326	1.13921	4.56818	10.7485	1.89811	8.10338	3.27184	10.0494	4.61838	7.95563
1700066C05Rik	0	0	0	0	0	0	0	0	0	0	0	0	0	0	0	0
1700066J03Rik	0	0	0	0	0	0	0	0	0	0	0	0	0	0	0	0
1700066M21Rik	66.3782	80.5322	74.4284	86.5429	92.6337	74.1276	84.2729	105.521	83.5131	73.2647	71.4499	66.3106	82.2696	98.9188	92.5031	105.449
1700066N21Rik	0	0	0	0	0	0	0	0	0	0	0	0	0	0	0	0
1700066O22Rik	0	0	0	0	0	0	0	0	0	0	0	0	0	0	0	0
1700067G17Rik	0	0	0	0	0	0	0	0	0	0	0	0	0	0	0	0
1700067K01Rik	0	0	0	0	2.33605	0	0	0	0	0	0	0	0	0	0	0
1700067P10Rik	0	0	0	0	0	1.07466	0	0	0	0	0	0	0	0	0	0
1700069L16Rik	0	0	1.97612	0	0	0	0	0	0	0	0	0	0	0	0	0
1700069P05Rik	0	0	0	0	0	0	0	0	0	0	0	0	0	0	0	0
1700071K01Rik	0	0	0	0	0	0	0	0	0	0	0	0	0	0	0	0
1700071M16Rik	0	0	0	0	0	0	0	0	0	0	0	0	0	0	0	0
1700072B07Rik	0	0	0	0	0	0	0	0	0	0	0	0	0	0	0	0
1700072I22Rik	0	0	0	0	0	0	0	0	0	0	0	0	0	0	0	0
1700072O05Rik	0	0	0	0	0	0	0	0	0	0	0	0	0	0	0	0
1700073E17Rik	0	3.96799	0	0	0	0	0	0	0	0	0	0	1.07835	1.66566	3.50109	0
1700074H08Rik	0	0	0	0	0	0	0	0	0	0	0	0	0	0	0	0
1700074P13Rik	0	0	0	0	0	0	0	0	0	0	0	0	0	0	0	0
1700080E11Rik	0	0	0	0	0	0	0	0	0	0	0	0	0	0	0	0
1700080N15Rik	0	0	0	0	0	0	0	0	0	0	0	0	0	0	0	0
1700080O16Rik	8.45497	1.9828	1.97661	0	0	0	2.89363	2.29705	1.13474	1.9414	0	0	5.44709	2.51198	0	6.93643
1700081H04Rik	0	0	0	0	0	0	0	0	0	0	0	0	0	0	0	0
1700083H02Rik	0	0	0	0	0	0	0	0	0	0	0	0	0	0	0	0
1700084D21Rik	0	0	0	0	0	0	0	0	0	0	0	0	0	0	0	0
1700084E18Rik	4.34593	1.00506	7.92905	1.02635	7.83162	4.37272	11.1231	6.80651	11.6011	4.97135	3.73089	4.61858	10.9858	2.48588	6.87979	0.964031
1700084F23Rik	0	0	0	0	0	0	0	0	0	0	0	0	0	0	0	0
1700084J12Rik	0	0	0	0	0	0	0	0	0	0	0	0	0	0	0	0
1700084M14Rik	0	0	0	0	0	0	0	0	0	0	0	0	0	0	0	0
1700085C21Rik	0	0	0	0	0	0	0	0	0	0	0	0	0	0	0	0
1700086L19Rik	0	0	0	0	1.5535	0	0	1.14974	1.12878	0	0	0	1.08214	0	0	0
1700086O06Rik	17.6024	14.1709	22.5793	18.2346	26.1097	15.8448	17.7918	23.0419	9.17112	21.5874	17.6959	9.35412	6.06938	20.2977	17.9482	12.9414
1700088E04Rik	93.0625	58.7398	49.0932	57.5762	56.0263	39.4972	30.5239	41.353	39.9685	58.8735	60.4292	47.2147	33.0047	39.3856	39.8794	37.0863
1700091H14Rik	0	0	0	0	0	1.07466	0	0	0	0	0	0	0	0	0	0
1700092C02Rik	0	0	0	0	0	0	0	0	0	0	0	0	0	0	0	0
1700092C10Rik	0	0	0	0	0	0	0	0	0	0	0	0	0	0	0	0
1700092E19Rik	0	0	0	0	0	0	0	0	0	0	0	0	0	0	0	0
1700092K14Rik	0	0	0.988059	0	0	0	0	0	0	0	0	0	0	0	0	0
1700092M07Rik	0	0	0	0	0	0	0	0	0	0	0	0	2.16126	0	0	0
1700093K21Rik	3.42972	0	1.07948	0	3.01418	0	1.05537	0	1.39601	3.40067	0.841942	4.37896	0	0	0	2.61661
1700094D03Rik	98.2049	111.031	112.389	103.659	141.883	75.0497	123.469	112.004	119.489	106.972	111.687	108.132	132.333	82.0472	70.236	121.773
1700094J05Rik	0	0	0	0	0	0	0	0	0	0	0	0	0	0	0	3.01128
1700094M24Rik	0	0	0	0	0	0	0	0	0	0	0	0	0	0	0	0
1700095A21Rik	0	0	0	0	0	0	0	0	0	0	0	0	0	0	0	0
1700095B10Rik	0	0	0	0	0	0	1.93697	0	0	0	0.949094	0	3.26678	0	0	0
1700095J03Rik	2.11542	8.9822	0	1.03216	0.778183	0	0	0	3.43704	0	2.84125	0	7.60188	2.49377	8.09714	0
1700095J12Rik	0	0	0	0	0	0	0	0	0	0	0	0	0	0	0	0
1700096J18Rik	0	0	0	0	0	0	0	0	0	0	0	0	0	0	0	0
1700096K18Rik	56.3812	80.2658	59.3569	32.5588	46.9719	30.2328	49.5472	48.0554	65.4672	79.4639	64.6534	51.248	53.0166	39.7701	34.3219	37.4904
1700096P03Rik	0	0	0	1.0417	0	0	0	0	0	0	0	0	0	0	0	0
1700097N02Rik	1.06888	0	0	0	0	0	0	5.65305	0	0	0	0	0	0	0	0
1700099I09Rik	0	0	0	0	1.6842	1.17553	2.45611	0	0	0	0	0	0	0	0	0
1700100I10Rik	0	0	0	0	0	0	0	0	0	0	0	0	0	0	0	0
1700100L14Rik	0	0	0	0	0	0	0	0	0	0	0	0	0	0	0	0
1700101I11Rik	16.9669	27.7459	26.7565	18.6958	27.9567	27.0771	31.5966	10.3326	12.5357	21.398	27.7175	12.5717	18.6611	22.6843	31.1805	20.7263
1700101O22Rik	0	0	0	0	0	0	0	0	0	0	0	0	0	0	0	0
1700102H20Rik	0.622948	3.54504	0	2.54583	0.939395	5.17578	0	0	0	0	1.00658	0.91473	0	0	1.22405	4.47249
1700102P08Rik	6.2754	2.95334	1.99497	5.22555	7.71196	6.44369	10.7272	1.15347	7.90747	5.78003	3.83971	8.07913	4.33505	5.00497	8.18489	6.05303
1700104L18Rik	0	0	0	0	0	0	0	0	0	0	0	0	0	0	0	0
1700105P06Rik	1.06421	1.00127	0	0	0	1.08595	0	2.22669	4.67909	0.981646	1.87657	0	1.10161	0	1.14068	2.94256
1700108F19Rik	4.24863	5.96383	4.95264	8.30641	0.77826	0	0.958845	6.89057	1.14108	0	5.72899	0.898053	2.19248	0.839676	2.31277	8.87413
1700108J01Rik	0	0	0	0	0	0	0	0	0	0	0	0	0	0	0	0
1700109G14Rik	0	0	0	0	0	0	0	0	0	0	0	0	0	0	0	0
1700109G15Rik	0	0	0	0	0	0	0	0	0	0	0	0	0	0	0	0
1700109H08Rik	3.09863	2.90574	1.03912	0	6.07392	10.65	3.98309	0	0	3.78984	2.87665	3.60015	0	0.817468	2.3491	5.2137
1700109I08Rik	0	0	0	0	0	0	0	0	0	0	0	0	0	0	0	0
1700109K24Rik	0	0	0	0	0	0	0	0	0	0	0	0	0	0	0	0
1700110C19Rik	0	7.98722	3.95964	6.21884	0	5.44561	6.66483	2.29467	0	0.982527	0.950013	0.907261	4.38371	5.02257	3.47211	5.90337
1700110I01Rik	0	0	1.97612	0	0	0	0	0	0	0	1.92528	6.28171	0	7.41527	2.35356	0
1700110I07Rik	0	0	0	0	0	0	0	0	0	0	0	0	0	0	0	0
1700110K17Rik	0	0	0	0	0	0	1.91632	1.15924	0	0	0	0	0	0	0	0
1700111N16Rik	0	0	0	0	0	0	0	2.29376	0	0	0	0	0	0	0	0
1700112H15Rik	0	0	0	0	0	0	0	0	0	0	0	0	0	0	0	0
1700112J05Rik	0	0	0	0	0	0	0	0	0	0	0	0	0	0	0	0
1700112J16Rik	16.771	8.33734	3.14141	27.2382	7.75779	9.0853	17.3256	25.8877	6.02236	9.15131	4.51871	6.33268	10.9881	8.34191	18.7083	25.7628
1700113A16Rik	2.1037	7.88918	9.94956	8.35168	4.64383	11.8161	5.80948	9.22385	11.271	13.6088	6.68912	7.24567	12.9751	5.81756	8.17151	11.0587
1700113B09Rik	0	0	0	0	0	0	0	0	0	0	0	0	0	0	0	0
1700113H08Rik	0	0	0	0	0.778683	0	0	0	0	0	0.958205	1.80251	0	0	0	0
1700116B05Rik	0	0	0	0	0	0	0	0	0	0	0	0	0	0	0	0
1700119H24Rik	0	0	0	0	0	1.07466	0	0	0	0	0	0	0	0	0	0
1700120C14Rik	40.0498	31.4089	33.9879	27.5416	22.6893	28.726	42.1445	29.3566	27.0072	46.1833	47.6795	24.6621	24.4045	30.0539	13.5869	17.4229
1700120E14Rik	0	0	0	0	0	0	0	0	0	0	0	0	0	0	0	0
1700120G07Rik	0	0	0	0	0	0	0	0	0	0	0	0	0	0	0	0
1700120K04Rik	1.06866	1.99563	0	0	0	0	0	1.12424	3.48947	0	0.940697	2.74662	0	5.00878	0	0.977106
1700121L16Rik	0	0	0	0	0	0	0	0	0	0	0	0	0	0	0	0
1700121N20Rik	0	0	0	0	0	0	0	0	0	0	0	0	0	0	0	0
1700122C19Rik	0	0	0	0	0	0	0	0	0	0	0	0	0	0	0	0
1700122H20Rik	0	0	0	0	0	0	0	0	0	0	0	0	0	0	0	0
1700122O11Rik	0	0	0	0	0	0	0	0	0	0	0	0	0	0	0	0
1700123J17Rik	0	0	0	0	0	0	0	0	0	0	0	0	0	0	0	0
1700123K08Rik	0	0	0	0	0	0	0	0	0	0	0	0	0	0	0	0
1700123L14Rik	1.05817	0	0	8.29851	0	0	0	0	0	0	1.91276	0	0	0	0	0
1700123M08Rik	73.2723	98.3183	135.186	33.1917	35.8351	49.8129	36.381	71.1193	67.1651	87.8496	89.6933	85.493	36.1137	45.3196	31.212	27.639
1700123O12Rik	0	0	0	0	0	0	0	0	0	0	0	0	0	0	0	0
1700123O20Rik	314.173	303.445	318.212	286.373	305.839	263.365	301.249	299.925	290.012	255.365	284.863	254.943	286.495	233.518	268.549	229.902
1700123O21Rik	0	0	0	0	0	0	0	0	0	0	0	0	0	0	0	0
1700124L16Rik	0	0	4.01217	0	2.35544	4.42841	4.61942	3.42035	0	3.98232	0.935802	0.926853	6.66236	6.67017	16.0557	0.964912
1700125G02Rik	0	0	0	0	0	0	0	0	0	0	0	0	0	0	0	0
1700125G22Rik	0	0	0	3.12511	0	0	0	0	0	0	0	0	0	0	0	0
1700125H03Rik	0	0	0	0	0	0	0	0	0	0	0	0	0	0	0	0
1700125H20Rik	0	0	7.90447	0	0	0	0	0	0	0	0	0	0	0	0	0
1700126H18Rik	0	0	0	0	0	0	0	0	0	0	0	0	0	0	0	0
1700128A07Rik	0	0	0	0	0	0	0	0	0	0	0	0	0	0	0	0
1700128F08Rik	0	0	0.988059	0	0	0	0	0	0	0	0	0	0	0	0	0
1700129C05Rik	0	0	0	0	0	0	0	0	0	0	0	0	0	0	0	0
1810006J02Rik	7.9408	2.83836	10.4622	0	1.50104	3.15078	3.24229	0	1.03866	0	1.98813	8.97596	2.02977	0	3.67507	1.06877
1810007C17Rik	0	0	0	0	0	0	0	0	0	0	0	0	0	0	0	0
1810007D17Rik	0	0	0	1.0417	0	0	0	0	0	0	0	0	0	0	0	0
1810008I18Rik	0	4.93594	0.992872	0	0	0	0	0	0	0	0	0	0	0	1.16401	1.0029
1810009A15Rik	356.513	343.907	365.523	273.279	370.27	364.363	346.107	303.075	336.329	327.31	330.264	333.726	392.3	293.911	293.557	320.892
1810009J06Rik	0	0	0	0	0.778683	0	0	0	0	0	0	0	0	0	0	0
1810010D01Rik	3.24965	3.07328	0.992164	0	1.5817	0	3.70328	2.21625	4.70901	11.7685	1.85284	1.81753	1.09417	2.48022	0	9.77903
1810010H24Rik	68.2651	32.5568	41.0547	36.5674	33.2064	30.0614	29.9723	24.1679	35.0718	69.7938	44.7857	62.3646	19.4731	17.4343	16.299	52.6516
1810012K16Rik	1.06187	2.98289	0.992606	0	6.19471	3.26974	3.79495	4.57595	2.30042	0.969915	4.74826	2.69166	0	0	0	0
1810013A23Rik	0	0	0	0	0	0	0	0	0	0	0	0	0	0	0	3.01128
1810013L24Rik	1118.84	1089.51	1273.52	1079.38	1359.35	1243.75	1369.05	1117.96	972.727	1061.72	1043.18	993.146	991.024	1115.4	1024.29	1090.44
1810014B01Rik	215.996	192.567	192.893	82.2189	100.914	130.823	91.3762	151.709	190.501	164.063	177.254	146.143	157.188	147.568	91.8563	94.9554
1810018F18Rik	0	0	0	0	0	0	0	0	0	0	0	0	0	0	0	0
1810019D21Rik	5.53481	6.2019	7.15593	7.50649	6.48884	8.96681	11.1286	24.5854	4.6305	5.01253	5.01379	5.54776	3.32394	5.94648	3.53264	7.04352
1810020O05Rik	4.24056	0.992515	0	1.03593	1.55573	0	0	0	0	0	0	0	0	1.68662	0	0.992606
1810021B22Rik	117.499	67.221	61.2774	49.3809	25.8521	31.5276	29.1233	32.9594	65.6685	97.903	80.7653	89.7299	24.0565	34.9227	14.9498	40.0262
1810022K09Rik	395.8	513.901	358.867	362.668	498.092	401.656	397.665	351.995	386.446	423.447	378.961	427.408	360.094	404.423	476.973	428.198
1810024B03Rik	0	1.97281	0	0	4.6296	4.30688	1.95057	1.15364	3.39697	2.89453	0	0	4.33704	3.33573	5.83728	1.00406
1810026B05Rik	355.647	316.103	317.119	358.298	443.569	334.467	404.561	342.176	267.916	356.373	365.429	410.478	352.083	263.1	389.966	350.144
1810030O07Rik	940.117	965.806	950.545	966.592	983.611	936.841	887.617	860.275	805.956	848.871	814.953	806.801	844.266	775.452	736.158	731.454
1810032O08Rik	99.3334	53.0305	12.3311	73.2697	75.7811	65.9851	50.148	60.9834	35.9272	51.5799	67.8823	68.9162	38.3779	61.6729	57.6447	64.2724
1810034E14Rik	296.289	282.002	275.278	158.253	169.469	256.576	214.631	226.318	274.669	238.269	225.602	244.728	271.955	254.946	209.153	205.18
1810037I17Rik	671.066	804.781	921.543	817.785	929.99	864.986	933.017	803.618	629.516	609.139	789.318	583.182	826.743	926.475	1015.28	906.523
1810041H14Rik	2.99016	0	0	1.29246	1.43926	0	0	2.11482	2.34185	1.32336	0	0.688755	3.05668	0	2.29739	0
1810043G02Rik	306.864	276.209	333.08	275.636	279.677	271.8	197.572	290.871	261.116	274.402	277.548	251.235	250.54	217.943	258.408	243.763
1810044D09Rik	40.8549	38.0424	36.7048	44.2664	28.1041	26.232	43.9652	30.7745	46.1175	37.389	32.0565	33.7152	39.6041	22.5334	43.5633	35.0944
1810046K07Rik	1.05909	0	0.995441	11.4005	1.55769	2.16326	8.62187	1.1432	7.99641	0.972933	0.950377	8.11277	3.26779	2.50582	4.61711	5.0003
1810053B23Rik	0	0	0	0	0	0	0	0	0	2.52357	0	0	3.33583	0	0	0
1810055G02Rik	342.038	312.542	363.181	359.739	428.653	437.291	434.092	456.601	321.741	291.548	312.299	272.923	297.272	346.565	405.919	322.794
1810058I24Rik	752.586	980.612	1138.11	955.407	1087.31	1124.03	1201.86	1210.65	706.855	707.639	783.154	743.922	1039.9	957.904	1237.21	995.759
1810062G17Rik	0	13.9367	2.96645	5.19064	12.5045	6.49873	8.59977	8.03732	4.54231	5.89367	5.69841	10.8847	2.17958	5.00791	5.78071	6.92704
1810062O18Rik	1.06042	3.96471	7.94171	5.1932	10.8696	6.49014	0.956815	2.29666	6.82658	1.95014	8.57727	3.61116	4.36742	11.7	5.78559	2.97673
1810063I02Rik	0	0	3.95224	0	0	0	0	0	0	0	0	0	0	0.83394	0	0
1810064F22Rik	5.10838	4.80457	2.03828	1.07044	4.53796	1.05279	0.999762	4.6916	0	6.65323	2.90293	8.98557	2.1325	4.11982	0	9.42929
1810065E05Rik	0	0	0	0	0.778683	0	0	0	0	0	1.90398	0	0	3.35114	0	0
2010001A14Rik	36.3558	59.7207	37.5042	39.3201	59.3334	55.2883	53.1765	58.3839	43.2932	32.499	28.4142	50.0211	68.8093	49.2173	40.4391	51.1093
2010003K11Rik	0	0	0	0	0	1.07466	0	0	3.45085	0	0.950643	0	0	0	0	0.992329
2010005H15Rik	5.27952	7.88772	4.03784	0	0	0	0.95177	0	0	0	0	1.8003	3.2716	0	0	1.99553
2010009K17Rik	0	0	0	0	0	0	0	0	0	0	0	0	0	0	0	0
2010010A06Rik	0	0	0	0	0	0	0	0	0	0	0	0	0	0	0	0
2010016I18Rik	2.14813	2.01452	11.8813	19.4816	2.35211	17.3849	2.83653	1.13037	1.15571	6.86934	2.83788	2.72678	4.36791	0.832065	6.87144	0.985519
2010106C02Rik	0	0	0	0	0	0	0	1.14688	0	0	0	0	0	0	0	0
2010106E10Rik	0	0	0	0	0	0	0	0	0	0	0	0	0	0	0	0
2010109A12Rik	0	0	1.00369	1.04339	0	0	0.951858	0	0	0	1.90296	1.81197	1.08709	0.828421	2.31927	5.04595
2010109I03Rik	1.05964	8.91626	0	1.03641	0.778743	2.15319	0	1.14565	1.13183	0	3.81418	3.61837	4.35267	2.50989	8.12425	0.995541
2010111I01Rik	1605.05	1432.85	1265.74	1205.96	1837.02	1691.49	2419.15	1756.19	1254.92	1282.71	1242.11	1184.17	1567.91	1787.02	1773.2	1522.62
2010204K13Rik	30.1786	39.7431	19.755	40.3753	21.9491	17.8722	9.85403	35.7482	25.6212	56.3012	33.2245	67.801	19.3624	21.2565	6.35754	15.0964
2010300C02Rik	386.464	220.748	296.279	138.987	188.868	260.003	244.502	211.185	272.855	331.486	313.791	337.333	227.769	197.442	179.674	174.846
2010308F09Rik	0	0	0	0	0	0	0	0	0	0	0	0	0	0	0	0
2010310C07Rik	1.05371	0	0	0	0	0	0	0	0	0	0	0	0	0	0	0
2010315B03Rik	296.953	338.658	159.858	200.785	267.182	297.062	275.489	285.003	287.238	312.54	308.733	312.764	183.291	263.863	257.965	303.176
2010320M18Rik	132.764	134.604	199.054	105.962	124.426	135.233	110.925	119.445	131.534	145.93	162.624	118.597	113.083	106.326	141.818	108.178
2200002D01Rik	54.9254	58.943	60.7461	67.9382	150.281	174.74	189.947	63.9669	63.3619	39.1309	52.2705	52.5047	164.834	119.61	142.479	109.485
2200002J24Rik	1.06518	0.991083	1.96449	0	0.775572	0	0	0	0	0	0	0	1.08063	0	0	0
2210010C04Rik	0	0	0	0	0	0	0	0	0	0	0	0	0	0	0	0
2210011C24Rik	28.8688	21.6634	16.0402	23.1676	7.11194	14.2138	22.7967	14.2658	23.9496	9.91078	27.1353	23.5136	9.83548	25.9907	14.5035	10.6353
2210016F16Rik	607.056	552.568	603.112	508.356	459.175	457.375	467.031	593.615	528.605	515.206	527.228	516.584	432.595	447.445	395.056	350.076
2210016L21Rik	550.999	508.484	579.467	522.711	538.672	503.322	465.045	462.593	471.948	488.77	483.894	559.017	516.712	449.676	429.527	496.102
2210039B01Rik	8.3533	7.84217	6.96402	1.05059	1.54261	1.07025	1.95062	3.48306	4.47204	2.90079	4.80476	13.5922	0	0.829624	2.34406	2.02206
2210404E10Rik	0	0	0	0	0	0	0	0	0	0	0	0	0	0	0	0
2210406O10Rik	2.30593	7.56357	6.58012	8.6711	5.58	0	3.14206	0	0	4.38164	5.10537	7.92291	8.03061	6.21137	8.5229	6.76572
2210407C18Rik	56.9895	49.4862	52.651	35.3251	8.50988	125.517	58.9012	100.986	24.0022	22.2133	11.5103	8.92016	7.68632	35.3595	4.63953	4.93722
2210408F21Rik	313.189	440.953	305.4	289.855	235.345	329.039	305.498	361.347	336.507	245.669	250.868	211.422	228.259	310.837	276.013	211.313
2210408I21Rik	91.1387	117.082	142.486	59.6303	140.04	94.279	124.432	100.407	86.0781	78.8035	72.9301	97.7858	93.7177	100.179	71.728	114.713
2210409D07Rik	0	0	0	0	0	0	0	0	0	0	0	0	0	0	0	0
2210409E12Rik	0	0	0	0	0	0	0	0	0	0	0	0	0	0	0	0
2210414B05Rik	0	0	0	0	0	0	0	0	0	0	0	0	0	0	0	0
2210416O15Rik	1.09307	1.02293	1.99539	2.00793	3.14101	3.26151	0	7.55938	3.61393	3.97427	2.83366	0	7.69199	0.816424	7.89638	5.80775
2210417A02Rik	4.22416	0	0	0	0	3.24511	0	2.2738	1.15487	0	0	0	0	0	0	1.96492
2210418O10Rik	0	0	69.2667	0	52.2686	81.9689	188.943	0	33.2848	0	73.9124	126.332	0	105.201	160.675	58.3419
2210420H20Rik	0	0	0	0	0	0	0	0	0	0	0	0	0	0	0	0
2300002M23Rik	0	0	0	0	0	0	0	0	0	0	0	0	0	0	0	0
2300003K06Rik	0	0	0	0	0	0	0	0	0	0	0	0	0	0	0	0
2300009A05Rik	132.017	107.049	136.068	123.732	152.341	174.016	207.701	148.983	95.9044	149.63	118.947	130.142	233.582	121.252	177.656	181.313
2310001H17Rik	12.6939	29.6377	13.9467	17.7295	20.1364	20.5276	17.2136	19.5671	10.3025	11.3638	17.2942	9.83347	12.4535	13.7693	13.6414	3.61756
2310001K24Rik	9.64103	8.0676	2.98914	0	3.9023	1.0975	1.85294	1.12385	2.33974	0.978007	3.74037	3.63363	4.40638	2.49703	3.42403	1.96642
2310002D06Rik	0	0	0	0	0	0	1.9096	1.16332	3.4161	0.972418	0	2.69969	0	1.66362	0	0
2310002F09Rik	3.10343	1.94495	3.00719	8.44487	0	4.25247	0.989458	0	2.23499	1.91363	0.968242	0	3.24076	0	0	4.08399
2310002L09Rik	540.917	656.958	586.347	509.975	432.745	766.414	857.873	840.708	580.851	458.356	534.455	449.388	692.052	921.961	667.166	515.038
2310003N18Rik	0	0	0	0	0	0	0	0	0	0	0	0	0	0	0	0
2310005A03Rik	0	0	0	0	0	0	0	0	0	0	0	0	0	0	0	0
2310005E17Rik	0	0	0	0	0	0	0	0	0	0	0	0	0	0	0	0
2310007B03Rik	0	0	0	0	0	0	0	0	0	0	0	0	0	0	0	0
2310008N11Rik	0	0	0	2.08341	0	0	0	0	0	0.973758	0	0	0	0	0	0
2310009A05Rik	171.536	187.974	213.089	144.071	153.372	174.4	211.619	139.126	139.351	125.955	166.534	148.518	167.112	135.305	163.279	175.306
2310009B15Rik	64.7824	68.2541	66.0402	75.8884	88.8632	76.1223	44.7105	51.017	55.3754	93.1082	59.4878	70.2339	34.6849	61.0031	26.6182	74.2565
2310010J17Rik	16.4057	24.4787	23.4583	5.46462	21.6728	7.85364	0.954422	11.6432	11.8641	15.0939	9.62457	20.3361	11.289	16.1919	13.4524	9.89395
2310011J03Rik	505.997	514.004	509.487	484.168	508.973	488.071	482.999	469.995	421.107	506.53	442.808	365.818	421.37	407.614	475.763	509.843
2310015A10Rik	849.852	765.459	701.282	502.969	587.183	524.672	542.952	661.519	614.911	828.973	716.502	868.339	641.957	554.96	492.815	680.767
2310015D24Rik	31.7278	14.8499	47.3826	33.2869	7.00226	10.7682	2.89993	14.9309	31.6752	35.1342	22.9329	17.9938	6.52873	13.4018	3.48623	3.97901
2310016D03Rik	56.3518	34.41	63.5014	29.2989	1.5426	10.7407	7.83839	46.264	61.9429	35.6099	53.0894	47.4817	7.58822	18.4216	9.38349	8.01635
2310016G11Rik	18.1651	21.9823	41.4685	9.28894	2.34729	6.50577	10.4458	18.2535	7.99123	11.8019	20.8205	23.5989	7.63794	6.67981	9.22658	6.9075
2310020H05Rik	0	0.994527	5.93718	0	0.778602	8.70026	12.3847	1.1476	0	2.93042	0.954753	0	5.49776	5.04364	2.30969	6.88927
2310022A10Rik	988.63	913.873	1133.61	911.705	947.628	1035.09	1100.34	1066.55	869.996	849.554	915.089	922.088	946.015	1006.28	939.541	987.151
2310022B05Rik	2082.1	2912.54	2150.63	2711.32	2794.41	1998.91	2388.54	2625.27	2383.8	1718.53	1871.36	2111.5	2756.25	2771.9	2940.84	2796.77
2310030A07Rik	0	0	0	0	0	0	0	0	0	0	0	0	0	0	0	0
2310030G06Rik	182.077	136.23	177.935	107.138	147.076	154.211	186.82	158.558	195.64	150.948	141.911	120.748	141.82	145.667	72.4143	133.417
2310033P09Rik	223.707	258.853	211.771	237.447	219.119	196.099	204.523	214.783	217.949	192.237	179.837	170.226	191.076	197.609	190.988	227.727
2310034C09Rik	0	0	0	0	0	0	0	0	0	0	0	0	0	0	0	0
2310034G01Rik	14.9694	21.0631	12.8626	7.1946	11.7249	11.9829	19.8967	13.6383	4.61116	5.8781	12.293	4.52502	15.319	14.1904	10.3699	8.84827
2310034O05Rik	0	0	0	0	0	0	2.90545	0	0	0	0	0	0	0	0	0
2310039H08Rik	284.036	305.19	315.114	241.292	347.431	281.03	405.37	320.405	303.225	237.257	257.657	247.868	322.144	304.097	299.231	277.204
2310039L15Rik	70.382	35.8667	49.5055	45.4927	32.7144	41.3105	28.4609	49.2148	42.3753	35.1896	32.2988	28.9201	30.6942	48.5363	35.7085	25.6004
2310040G24Rik	111.275	95.8639	117.529	84.4228	57.0836	82.2361	56.6935	66.0114	132.309	107.214	86.1393	122.119	69.0193	54.8372	43.593	42.7143
2310043L19Rik	0	0	0	0	0	0	0	0	0	0	0	0	0	0	0	0
2310043M15Rik	0	0	0	1.0417	0	0	0	0	0	0.976079	0	0	1.08217	1.66155	0	0
2310043O21Rik	0	0	0	0	0	2.14931	0	0	0	0	0	0	0	0	0	0
2310050C09Rik	0	0	0	0	0	0	0	0	0	0	0	0	0	0	0	0
2310057J18Rik	0	0	0	0	0	0	0	0	0	0	0	0	0	0	0	0
2310057M21Rik	228.39	261.188	194.905	215.52	214.579	210.937	266.93	234.907	211.049	184.532	210.423	218.912	203.767	225.879	181.378	147.547
2310057N15Rik	0	0	0	0	0	0	0	0	0	0	0	0	0	0	0	0
2310061I04Rik	1105.19	1133.46	1221.31	903.707	767.109	1169.6	988.374	1167.11	1018	862.702	927.796	894.121	873.556	995.582	908.343	806.283
2310061N02Rik	0	0	0	0	0	0	0	0	0	0	0	0	0	0	0	0
2310065F04Rik	0	0	0	0	0	0	0	0	0	0	0	0	0	0	0	0
2310068J16Rik	8.67513	9.13044	19.0304	4.08512	4.70634	2.16881	12.1577	18.9908	11.6907	8.86288	6.58508	15.7164	2.17046	22.1033	4.54064	17.8263
2310069B03Rik	22.6154	26.0999	35.0739	14.8849	19.0751	15.8938	36.8292	23.4739	29.8166	21.9336	12.656	18.028	40.6938	42.2897	24.8871	16.4517
2310069G16Rik	23.1834	12.8283	24.9987	15.6678	14.6847	32.288	18.2776	33.3675	18.1304	9.72493	13.3355	8.12283	10.8618	13.3175	11.5969	17.1153
2310075C17Rik	0	0	0	0	0	1.06913	0	8.06969	0	0	0	4.51487	0	0	0	0
2310079G19Rik	0	0	0	0	0	0	0	0	0	0	0	0	0	0	0	0
2310081J21Rik	0	1.98039	0	0	0.774239	4.33116	0	0	2.29218	0.981439	0	0	1.09812	0	1.14973	4.88877
2400006E01Rik	0	0	0	0	0	0	0	0	0	0	0	0	0	0	0	0
2410002F23Rik	675.864	534.855	616.745	459.07	672.93	472.823	519.457	564.404	550.296	625.868	580.512	600.875	472.597	513.958	439.481	515.102
2410003L11Rik	0	0	0	0	0	0	1.93697	0	0	0	0	0	4.32253	0	0	0
2410004B18Rik	262.513	309.444	286.691	264.083	278.283	264.784	245.337	239.342	244.971	246.444	246.893	244.036	248.373	230.205	254.597	256.469
2410004I01Rik	8.49222	10.9405	16.7748	6.21474	2.33597	3.25797	8.60145	1.14668	7.98966	14.6242	11.4435	16.1779	4.38106	9.23325	13.8733	5.91876
2410004P03Rik	0	7.10512	20.9466	12.4353	9.50032	12.8266	20.1025	15.633	8.06119	12.7015	5.67552	1.80156	2.18928	4.19135	11.4741	9.90693
2410006H16Rik	170.192	138.788	173.031	178.3	204.172	185.203	148.113	104.362	128.677	178.127	126.685	146.819	254.147	110.778	115.548	176.844
2410012E07Rik	0	0	0	0	0	0	0	0	0	0	0	0	0	0	0	0
2410015M20Rik	1496.8	1527.32	1405.67	1317.48	1252.48	1366.49	1350.46	1610.42	1372.94	1295.88	1266.56	1224.96	1227.96	1391.68	1291.74	1081.71
2410017I17Rik	0	0	0	0	0.794001	0	1.8996	0	1.15603	0.976428	3.74885	2.71667	0	1.65491	0	0
2410018L13Rik	11.7702	15.9983	41.5814	16.5194	27.3593	23.7903	25.7344	24.9683	14.9023	37.1924	27.6293	40.8993	16.3612	24.1317	21.8409	32.5557
2410021H03Rik	0	0	0	0	0	0	0	0	0	0	0	0	0	0	0	0
2410022M11Rik	135.274	53.9193	97.2579	73.4243	87.8304	80.6948	67.1161	96.127	105.929	82.4039	101.187	73.7655	62.9586	70.1964	55.2135	56.9647
2410124H12Rik	0	0	0	0	2.33605	0	0	0	4.52144	0	0	0	0	0	0	0
2410131K14Rik	310.955	322.951	397.866	288.627	289.514	330.586	312.024	349.725	277.223	290.721	264.989	285.945	292.757	344.402	280.965	319.186
2410137M14Rik	1.05371	0	0	0	0	0	0	0	0	0	0.956942	0.909778	0	0	0	1.99134
2410141K09Rik	0	0	0	0	0	0	0	0	0	0	0	0	0	0	0	0
2500002B13Rik	45.1623	62.7316	46.3847	57.5506	46.7511	49.1315	42.7381	55.3707	29.7866	30.6967	46.2561	20.8465	53.0855	69.4985	52.5034	31.2746
2500004C02Rik	110.138	126.937	135.178	88.1511	78.5211	114.486	116.084	80.5309	113.428	67.8203	99.6798	67.4488	109.402	82.0963	72.0137	140.1
2510002D24Rik	465.291	410.26	374.499	322.158	377.478	269.851	414.065	408.553	372.259	424.924	411.039	411.829	365.478	350.963	294.149	329.372
2510003B16Rik	0	0	0	3.0933	0	1.0857	0	0	0	0	0	0	1.08063	0	0	0
2510009E07Rik	999.848	1097.98	890.064	1052.76	1097.12	906.272	1249.05	979.865	1011.81	917.344	863.105	1005.85	1184.42	1115.52	972.447	1065.41
2510039O18Rik	787.789	821.319	941.85	1116.03	870.609	947.44	900.146	1084.33	834.227	802.476	805.977	640.511	872.049	775.449	735.586	875.132
2610001J05Rik	578.56	670.713	583.379	577.354	709.665	669.477	651.888	721.746	572.44	551.13	532.049	546.956	625.781	638.946	693.208	623.298
2610002M06Rik	518.319	454.285	473.037	505.942	475.927	393.495	409.671	385.89	463.758	475.358	397.608	485.29	345.489	361.763	406.971	393.6
2610005L07Rik	786.3	757.614	624.542	697.596	926.108	696.642	619.088	719.22	611.554	844.841	757.366	763.122	579.925	635.331	627.105	591.585
2610008E11Rik	521.328	681.409	305.481	416.848	602.3	531.283	535.902	523.78	537.166	585.888	543.063	627.671	311.064	506.597	492.392	553.28
2610016A17Rik	0	0	0	0	0	0	0	0	0	0	0	0	0	0	0	0
2610020C07Rik	15.4209	1.93721	3.02163	2.12571	6.8631	3.17727	0.993379	3.50782	8.83748	9.55692	14.4778	13.5155	0	9.89426	2.36454	1.03395
2610024D14Rik	0	0	0	0	0	0	0	0	0	0	0	0	0	0	0	0
2610027K06Rik	3.19397	1.99687	3.94306	8.25994	8.60504	12.9831	11.4943	2.28023	3.42008	0.979582	1.90006	7.22637	5.44538	3.34372	4.62669	2.97276
2610028E06Rik	0	0	0	0	0	0	0	0	0	0	0	0	0	0	0	0
2610028H24Rik	133.225	273.132	160.901	273.066	28.9774	40.0959	99.2729	355.079	115.43	198.1	213.88	163.664	59.9327	122.82	18.4885	37.6604
2610035D17Rik	263.741	149.603	115.667	170.65	180.406	210.81	137.818	132.373	156.204	309.124	306.12	320.587	195.014	137.878	50.7967	175.871
2610035F20Rik	0	0	0	0	0	0	0	0	0	0	0	0	0	0	0	0
2610037D02Rik	1.04463	0.981267	0	2.10675	0	2.14132	0	3.48261	2.25341	2.91483	0	2.71091	0	0.837881	0	0
2610042L04Rik	2.02813	0	1.0097	2.13268	9.78886	5.23742	5.99335	11.7188	9.89326	6.63903	5.84517	3.60412	5.32724	3.30144	8.32811	2.0889
2610044O15Rik8	166.801	119.567	143.991	133.343	155.63	134.614	113.577	178.189	111.949	160.263	153.056	156.874	89.3177	140.23	124.971	135.126
2610203C22Rik	16.2495	20.1049	12.1508	20.3948	18.1443	30.5029	18.098	18.9363	20.7406	21.7784	11.7391	14.4917	19.0855	24.6865	13.151	17.7949
2610206C17Rik	1.05521	0.989369	0.990326	6.24488	1.55284	3.23129	3.87626	1.1467	2.28352	3.89448	0	1.79715	0	0	0	5.99249
2610301B20Rik	266.891	314.563	243.984	232.915	282.076	224.006	204.669	223.91	251.27	273.57	209.93	241.338	270.981	207.317	207.651	240.747
2610306M01Rik	194.295	160.993	173.82	118.662	159.439	117.195	149.214	125.448	143.247	167.697	125.007	146.66	120.181	96.9627	125.672	128.138
2610307P16Rik	11.3718	20.3983	4.1047	10.4636	21.5493	13.7833	13.5865	17.5678	8.87944	21.0911	13.3959	17.0414	11.8763	12.4228	17.0272	13.0902
2610316D01Rik	0	0	0	0	0	0	0	0	0	0	0	0	0	0	0	0
2610318M16Rik	0	0	0	0	0	0	0	0	0	0	0	0	0	0	0	0
2610318N02Rik	0	0	1.03938	4.33129	2.46998	3.0221	0	2.11649	5.89019	2.01589	2.58131	0	0	0.859246	0	0
2610507B11Rik	9794.11	10030	11437.2	11018	7237.44	8872.84	9759.65	12443.5	9318.26	8338.55	8729.79	8730.45	7140.97	9167.66	7760.26	7345.43
2610507I01Rik	475.288	458.504	485.757	415.279	450.427	510.906	389.106	447.399	422.616	409.268	440.961	406.503	376.336	415.712	441.816	392.102
2610524H06Rik	21.1047	24.7514	24.9505	16.6448	30.9709	35.6098	33.6974	22.9216	17.1035	24.2352	17.1718	21.5439	20.7317	29.2584	39.3827	17.9981
2610528A11Rik	3.21197	0	0	2.07716	0.782846	0	0.950935	0	1.13757	1.96513	0	3.62753	0	0	0	5.90521
2610528J11Rik	0	1.98399	0	0	0	0	0	0	0	0	0	0	0	0	0	0
2700012I20Rik	4.26895	15.9773	5.9367	6.19277	17.1591	4.35086	3.79374	4.56766	11.4715	8.81071	12.3236	6.32996	12.0532	8.36598	9.22071	5.89881
2700038G22Rik	10.6688	25.554	9.04589	34.266	23.1436	18.219	32.7933	6.87542	7.99474	9.62694	13.2835	12.6637	8.63572	17.4264	18.766	19.1643
2700046A07Rik	15.7538	29.5452	12.8484	10.4572	5.42858	8.59241	3.88859	18.4838	12.3668	40.7444	45.169	30.543	14.1139	4.1872	2.32981	4.01103
2700046G09Rik	60.3164	59.7173	71.968	71.4921	83.0458	48.0873	62.74	71.9418	58.2602	49.0696	61.5938	66.7902	51.6539	65.5391	63.4677	73.2806
2700049A03Rik	182.416	204.201	241.577	202.698	198.057	144.103	210.21	179.674	155.898	162.406	188.495	179.285	179.157	182.563	170.989	169.59
2700054A10Rik	61.2119	45.2391	43.4057	28.2222	21.3438	37.1839	47.2378	15.1353	34.366	53.5791	31.8014	41.3862	34.191	19.5336	19.971	39.2617
2700062C07Rik	126.807	128.618	112.26	118.689	136.477	108.965	108.741	91.8949	105.641	116.83	105.862	135.041	132.967	103.648	99.7511	130.56
2700069I18Rik	0	0	0	1.0417	0	0	0	0	0	0	0	0	0	0	0	0
2700070H01Rik	2.10375	11.8129	3.96552	13.5998	6.19879	19.3135	3.88021	9.23675	13.4924	7.78452	6.7024	1.80305	6.50323	13.3505	20.9675	10.051
2700081O15Rik	1098.46	957.656	1031.84	815.211	1172.56	741.434	824.089	863.983	959.094	990.425	1039.24	991.953	859.938	805.423	704.765	758.224
2700089I24Rik	0	0	0	0	0	0	0	0	0	0	0	0	0	0	0	0
2700097O09Rik	77.844	113.828	89.0852	83.6006	90.7307	86.5367	75.4505	76.146	84.2372	88.5321	102.027	105.613	60.8803	69.0214	88.5445	115.571
2700099C18Rik	7.28665	5.84845	17.1505	11.6136	12.2533	9.58836	10.7715	8.10693	5.62543	7.71408	10.5998	10.7815	4.34351	7.51593	2.33935	0
2810001G20Rik	96.1853	146.101	75.6448	69.439	92.3695	92.0256	91.2026	77.7781	77.7805	74.6625	77.1399	86.1729	120.117	116.251	93.7294	87.8274
2810002D19Rik	135.028	158.014	84.3413	124.452	89.6604	105.457	96.4568	122.97	127.742	87.4249	121.248	122.875	131.583	126.365	102.087	101.273
2810004N23Rik	795.835	906.069	853.411	710.088	727.197	791.332	778.135	658.776	665.052	604.885	599.872	601.218	728.004	809.429	718.297	747.66
2810006K23Rik	247.57	352.195	348.438	286.694	260.584	347.534	304.229	284.292	324.077	280.029	282.582	238.903	246.821	266.795	232.675	279.46
2810013P06Rik	329.39	343.624	327.577	264.835	303.729	249.722	292.067	317.425	319.663	253.399	225.414	276.656	339.397	334.395	234.202	297.237
2810021J22Rik	122.042	135.257	113.239	109.188	128.846	87.6695	104.958	107.801	100.693	118.714	117.644	114.137	131.759	111.019	96.1573	136.462
2810025M15Rik	394.943	388.076	445.541	375.205	365.241	412.42	321.914	339.192	301.061	365.606	335.791	355.815	368.985	360.128	349.545	357.446
2810029C07Rik	2.12025	6.94956	5.91063	19.7195	20.2747	14.0526	16.3303	19.5106	9.07418	16.6026	10.5047	8.09392	17.4645	5.03519	8.10136	18.8382
2810032G03Rik	2.10595	1.97329	0.996428	6.2684	6.19052	0	7.72621	8.05908	1.13146	1.93996	3.82093	0	2.17721	6.68822	4.6359	4.00597
2810047C21Rik1	151.593	96.0254	198.293	151.816	115.771	73.0095	89.0719	127.81	161.252	103.326	165.665	133.288	147.055	146.461	114.047	115.507
2810049E08Rik	0	0	0	0	0	0	0	0	0	0	0	0	0	0	0	0
2810403D21Rik	5.95853	11.253	5.15285	1.0938	15.5795	4.13447	6.20035	15.6276	3.21777	6.52464	7.88778	6.37196	8.33325	4.86202	7.30857	1.08392
2810404M03Rik	0	0	0	0	0	0	0	0	0	0	0	0	0	0	0	0
2810405F15Rik	0	0	0	0	0	0	0	0	0	0	0	0	0	2.48887	1.16906	0
2810408A11Rik	8.60967	7.16562	16.6693	6.32009	5.59961	3.03758	10.5799	13.5373	3.46516	4.97313	11.4809	14.5111	12.1549	7.63451	3.47225	6.05223
2810408I11Rik	5.11855	0	3.00762	1.05415	4.53992	0	2.95176	1.16462	0	0.951413	0	0	3.21622	0.826055	8.29207	1.02638
2810410L24Rik	72.8385	79.7154	57.3018	29.6376	53.5397	11.9737	49.2711	41.75	74.9336	65.8584	54.5184	52.555	53.4161	43.3384	62.1394	55.4969
2810414N06Rik	41.8069	25.8082	65.2002	32.8117	18.3022	39.7219	34.5503	21.749	43.377	28.279	14.6781	14.6985	28.8	20.8172	18.0264	30.1327
2810429I04Rik	1.05441	0.985801	0	3.15787	1.54152	2.16094	0	0	0	0.971128	0	0	0	0	2.33231	0
2810433D01Rik	3.15931	4.93486	8.93006	10.4318	25.5759	7.52744	6.77768	8.06315	2.25809	1.944	2.87128	0.90079	33.6554	15.0331	32.5936	20.0278
2810442N19Rik	2.11544	0	0	0	0.775733	0	0	0	1.12905	1.94124	0	0	1.08697	0.832727	0	0
2810454H06Rik	15.3482	23.1852	25.284	10.6457	20.5232	12.6783	15.9853	7.02661	24.2953	22.8355	16.4878	14.435	11.7113	14.0152	16.6306	14.6041
2810459M11Rik	3.1869	0	0.995197	3.11622	0.778281	0	9.63982	5.69275	0	2.92585	0	0.915769	0	0.827535	5.80269	0.997957
2810468N07Rik	41.607	28.8544	33.5755	18.6467	42.9553	54.9907	47.8294	16.0045	44.2951	37.4645	49.1833	28.2198	40.1556	36.5988	44.0718	43.5895
2810471M01Rik	0	0	0	0	0	0	0	0	0	0	0	0	0	0	0	0
2900005J15Rik	69.8462	51.655	25.6672	21.7883	48.338	49.6848	48.1064	42.412	45.4206	59.4245	42.9484	54.8161	37.0727	22.6362	41.6678	32.8745
2900009J06Rik	8.47158	13.817	8.97511	12.5032	6.95478	12.9855	7.63682	16.1506	7.96104	13.6065	17.1575	12.7081	33.829	9.14458	5.79429	4.97297
2900011O08Rik	4.17886	0.980522	2.98417	0	0.772513	1.06946	11.7632	5.8164	2.23722	5.8314	0	0	2.15732	5.83126	9.44719	0
2900026A02Rik	2354.06	1927.47	2192.25	2114.51	2185.04	1925.49	2217.89	2185.68	2199.9	2055.24	1930.23	2045.28	2090.03	1863.07	2202.55	2111.52
2900040C04Rik	0	0	0	0	0	0	0	0	0	0	0	0	0	0	0	0
2900041M22Rik	15.8863	31.6932	17.8166	14.5575	24.8753	36.5927	6.75052	6.88844	16.9836	6.84615	21.8931	15.3923	32.5328	11.6619	23.283	29.8918
2900052L18Rik	141.295	190.297	130.205	106.6	178.151	141.302	119.205	111.938	107.969	151.809	171.155	212.206	151	169.566	130.854	193.17
2900052N01Rik	5.08709	7.69062	8.07897	35.2795	7.5763	13.6969	10.0764	9.41894	3.29607	6.63593	2.92565	16.2157	4.24605	4.12368	1.19528	12.5322
2900055J20Rik	1.05443	4.95662	0	0	0	0	0	0	0	0	0	0	0	0	0	0
2900057B20Rik	0	0	0	0	0	0	0	0	1.13036	0	0	0	0	0	0	0
2900060B14Rik	3.1704	4.94647	0	0	3.08919	2.1675	5.77821	1.15292	6.84053	0	3.80822	0.895538	2.18382	0.833592	2.31272	0
2900076A07Rik	28.0601	24.3688	25.0174	17.9344	40.6283	16.0145	24.5459	18.6185	13.4398	12.4875	12.5369	22.5014	20.5064	19.1181	29.3727	19.3036
2900079G21Rik	0	0	0	0	0	0	0	0	0	0	0	0	0	0	0	0
2900092C05Rik	0	0	0	0	0	0	0	0	0	0	0	0	0	0	0	0
2900092D14Rik	0	0	0.988059	0	0	0	0	0	0	0	0	0	1.08063	0	0	0
2900093K20Rik	22.3027	22.9436	15.0228	23.8032	26.3657	17.3922	18.9307	17.1207	18.4647	21.36	16.1018	14.423	13.1608	14.1941	17.2106	13.9284
2900097C17Rik	9104.09	8610.67	8535.1	8703.37	6714.32	7756.7	7660.41	8302.7	7778.81	7591.92	7344.04	7518.52	6629.59	7046.2	6329.36	6674.2
3000002C10Rik	90.6964	53.7344	55.1835	40.3887	53.928	62.6753	53.4577	44.6439	40.8651	43.341	61.6493	57.231	69.6672	30.8757	57.8637	54.3076
3010001F23Rik	1.06464	3.95945	0.978462	0	5.30705	6.50022	4.87325	3.48879	0	0	6.65064	5.41386	1.10117	4.19434	4.5447	2.01952
3010003L21Rik	4.3181	2.03059	2.97581	12.2318	1.5755	1.08863	5.63664	5.60029	1.16506	6.87736	5.65428	1.82599	2.18159	1.65712	3.41539	1.97368
3100003L05Rik	0	0	0	0	0	0	0	0	0	0	0	0	0	0	0	0
3110009E18Rik	8.71644	22.2285	20.7034	23.5395	19.6776	14.3718	20.9728	14.4061	23.9549	25.3539	19.9335	14.4253	23.3045	22.1636	23.45	13.6288
3110009F21Rik	0	0	0	0	0	0	0	0	0	0	0	0	0	0	0	0
3110015C05Rik	0	0	0	0	0	0	0	0	0	0	0	0	0	0	0	0
3110021A11Rik	2.17365	2.03516	1.98961	3.06291	4.73339	0	2.80129	3.37377	3.50332	6.90006	4.70193	1.83323	2.1893	5.79634	3.40821	10.7659
3110039I08Rik	564.585	621.303	233.446	368.901	652.686	465.493	466.979	482.062	436.94	515.231	449.687	617.31	304.433	444.492	539.036	516.779
3110039M20Rik	0	0	0	0	0	0	0	0	0	0	0	0	0	0	0	0
3110040N11Rik	172.859	158.221	167.171	109.516	147.748	137.649	240.243	163.16	144.61	128.429	168.755	140.351	143.595	171.119	178.223	157.036
3110045C21Rik	12.4245	20.3936	8.07142	14.8307	6.87074	5.31329	7.88298	2.32814	15.6394	2.87684	5.78109	15.2693	7.53615	11.6122	9.39197	5.14461
3110056K07Rik	86.89	159.679	101.746	113.912	120.604	109.418	115.863	89.8024	93.4194	126.545	124.106	80.8151	134.979	115.582	124.737	122.532
3110070M22Rik	37.5384	34.21	38.5171	37.9134	28.2749	63.1618	30.2471	39.6413	26.4837	35.4396	37.6753	37.2368	51.3024	31.6537	26.4614	26.618
3110082I17Rik	128.091	117.275	144.168	134.861	120.676	139.792	122.822	76.1921	131.776	113.805	110.644	118.666	108.924	95.9289	103.735	109.068
3110082J24Rik	0	0	0	0	0.778683	0	0	0	0	0	0	0	0	0	0	0
3110099E03Rik	0	0	0	0	0.778683	0	0	0	0	0	0	0	0	0	0	0
3200001D21Rik	0	0	0	0	0	0	0	0	0	0	0	0	0	0	0	0
3300002I08Rik	2.13527	3.98263	1.97637	7.24217	3.89861	5.44147	1.89228	6.87654	3.42967	14.7167	5.70064	11.778	3.29374	0	2.30412	1.96381
3300002P13Rik	0	0	0	0	0	1.07466	0	0	0	0	0	0	0	0	0	0
3300005D01Rik	0	2.25698	1.12082	3.17638	9.8354	0	1.51994	0	1.14524	0	0.955915	4.51476	0	3.36717	2.31546	4.93229
3425401B19Rik	1277.64	991.307	1447.37	1084.26	1026.7	1352.44	1105.94	1030.5	960.556	1041.63	1029.17	936.525	929.167	1181.79	843.452	1088.78
3632454L22Rik	0	0	0	0	0	0	0	0	0	0	0	0	0	0	0	0
3830403N18Rik	42.3066	102.974	32.0059	54.0617	43.2787	34.3994	51.9228	54.0422	36.5878	52.1606	34.6513	41.3734	43.6849	36.3807	34.8033	57.4957
3830406C13Rik	509.138	556.429	449.592	431.409	459.08	466.263	451.64	524.44	449.263	480.354	478.254	534.408	428.228	458.431	442.524	392.583
3830408C21Rik	19.9618	15.8009	10.9299	27.0999	11.6075	21.5127	25.2827	35.6432	15.8643	18.3797	18.2163	25.0831	26.0884	16.739	17.4822	13.0225
3830417A13Rik	0	0	0	0	1.55737	0	0	0	0	0	0	0	0	0	0	0
3830432H09Rik	0	3.9659	0	0	1.55819	0	0	0	1.13009	0	0	1.79939	0	0.837746	0	1.00308
3930402G23Rik	0	0.994845	0	5.19398	0	2.16066	1.92489	1.14793	2.26323	0.979278	0.951816	0	0	0.83613	1.15767	0
4430402I18Rik	403.48	363.32	455.009	218.162	191.144	264.038	201.513	284.237	354.037	409.756	340.511	412.236	229.758	285.799	203.731	195.486
4631405J19Rik	50.1966	71.9291	34.5563	38.202	29.715	15.1536	40.9643	76.3951	98.2492	74.6895	47.324	69.8545	34.8716	55.0879	26.5666	21.7215
4632404H12Rik	108.368	94.1542	103.924	85.0614	112.432	80.0658	114.695	83.3079	114.292	127.263	103.998	109.368	136.593	136.112	82.1512	126.901
4632415L05Rik	581.387	560.253	523.178	495.853	466.318	503.597	444.633	584.869	450.213	415.81	417.479	416.355	414.895	420.84	364.232	430.115
4632427E13Rik	8.55436	12.1092	9.93375	10.2424	4.69195	2.19109	6.56983	7.92984	5.82594	14.6128	2.83105	3.6036	12.1172	5.86776	15.9853	8.84556
4632428C04Rik	69.9418	50.6042	57.2129	32.1904	11.6974	26.9092	11.5734	40.1412	53.1112	57.797	69.5522	47.0631	21.6866	39.2375	12.7884	24.8855
4732414G09Rik	0	0	0	2.08341	0	0	0	0	0	0	0.95638	0	0	0	0	0
4732416N19Rik	0	0	0	0	0.778683	0	0	0	1.1459	0	0	0	0	0.835859	0	1.97576
4732471J01Rik	3.79822	15.6205	3.21527	5.52419	2.68513	12.9726	1.69785	0.961177	4.60301	9.53537	16.4015	11.4273	1.84467	14.8705	14.5795	5.7873
4732490B19Rik	0	0	0	0	0	0	0	0	0	0	0	0	0	0	0	0
4732491K20Rik	87.4752	120.573	92.8896	70.8508	87.7723	78.512	97.0204	80.5323	125.349	99.245	87.1296	87.1001	76.0495	98.8122	66.3393	62.9855
4831407H17Rik	0	0	0	0	0	0	0	0	0	0	0	0	0	0.83394	0	0
4831440E17Rik	89.6677	100.017	45.4985	63.0882	87.2229	69.4886	70.3936	70.5243	74.7393	84.5158	63.3179	87.3167	64.8294	78.4252	81.0061	94.0878
4833411C07Rik	2.12117	0.990602	2.9472	0	0.777507	3.23095	0	0	2.27887	11.8164	7.62476	0	0	0	1.15882	1.98334
4833412C05Rik	9.40078	28.4185	27.005	29.4026	149.193	90.9735	152.3	56.7212	22.4702	0	11.4996	0.899242	127.32	146.137	188.247	128.597
4833415N18Rik	0	0	0	0	0	0	1.92975	2.30235	0	0	0	0	3.2419	0	0	0
4833417C18Rik	12.5346	7.85072	6.97218	11.5339	7.70734	16.0626	9.78259	17.3543	10.1182	3.85737	22.1525	20.6384	4.33026	11.6938	8.19279	22.1855
4833418N02Rik	22.2434	12.9405	22.8288	10.37	21.7913	12.9257	27.9038	31.9868	14.7975	23.3182	7.66181	16.3484	8.66628	27.4215	20.8332	25.9416
4833419F23Rik	60.0419	49.4138	25.8675	32.2902	42.5231	34.5438	56.9593	39.1142	42.0555	31.0074	46.8464	35.0156	37.0509	28.4249	39.5201	30.9648
4833420G17Rik	540.685	449.467	541.599	500.87	639.082	609.299	516.884	499.3	490.349	507.367	473.916	511.39	541.568	505.675	487.755	501.245
4833422C13Rik	22.7608	16.2427	14.4678	19.7245	33.7913	25.7615	15.2539	31.6251	13.0236	9.63174	10.4303	24.4979	26.0108	18.167	31.9502	23.0889
4833422M21Rik	0	1.9772	0	2.08791	0	0	0.969715	0	2.26644	0	1.91095	0	0	1.67209	1.16255	4.00018
4833423E24Rik	0	0	0	0	0	0	0	0	0	0	0	0	0	0	0	0
4833427F10Rik	2.11823	4.95187	4.93719	4.16062	7.7859	5.39352	15.3823	9.1966	5.65721	0	3.81971	2.70739	3.26849	5.02367	18.5502	2.98754
4833427G06Rik	2.1139	0	0	2.09259	0.772892	0	0	0	0	0	0	0	0	0	4.65203	0
4833428L15Rik	0	0	0	0	0	0	0	0	0	0	0	0	0	0	0	1.00376
4833438C02Rik	60.7295	61.3789	55.2118	66.3741	87.8007	43.2136	51.0678	72.1849	51.5205	30.0225	59.8337	71.4228	88.844	45.9007	45.4988	53.9631
4833439L19Rik	2764.66	2749.37	2976.51	2893.17	2632.07	2950.81	3014.65	3038.01	2563.42	2642.15	2351.85	2427.03	2533.34	2611.37	2764.21	2805.55
4921501E09Rik	0	0	0	0	0	0	3.87393	0	0	0	0	0	0	0	0	0
4921504A21Rik	71.6227	115.46	49.7582	49.8524	57.8321	71.8973	53.6434	52.7792	98.3544	74.6459	62.3123	88.31	35.4999	69.2565	49.1652	37.9751
4921504E06Rik	0	0	0	0	0	0	0	0	0	0	0	0	0	0	0	0
4921507G05Rik	0	0	0	0	0	0	0	0	0	0	0	0	0	0	0	2.00752
4921507P07Rik	47.7449	43.9722	58.0504	34.7789	42.2357	30.9301	44.2716	17.4006	49.2234	57.7314	34.6787	57.5057	21.5355	24.1271	43.4519	34.6872
4921508D12Rik	0	0	0	2.08341	0	0	0	0	0	0	0	0	0	0	0	0
4921509C19Rik	0	0	0	0	0	0	0	0	0	0	0	0	0	0	0	0
4921509O07Rik	2.11319	0.989288	0	0	0	0	0	0	0	0	0.95638	0	0	0	0	0
4921511C10Rik	0	0	0	0	0.778683	0	0	0	0	0	0	0	1.08063	0	0	0
4921511C20Rik	0	0	0	0	0	0	0	0	0	0	0	0	0	0	0	0
4921511I17Rik	0	0	0	0	0	0	0	0	0	0	0	0	0	0	0	0
4921511M17Rik	0	0	0	0	0	0	0	0	0	0	0	0	0	0	0	0
4921513H07Rik	0	0	0	0	0	0	0	0	0	0	0	0	0	0	0	0
4921513I03Rik	0	0	0	0	1.55737	0	0	0	0	0	0	0	0	0	1.16301	0
4921515E04Rik	0	0	0	0	0	0	0	0	0	0	0	0	0	0	0	0
4921517D22Rik	0	0	0	0	0	0	0	0	0	0	0	0	0	0	0	0
4921518K17Rik	0	0	0	0	0	0	0	0	0	0	0	0	0	0	0	0
4921524J17Rik	277.008	388.483	323.68	375.698	357.871	291.741	362.931	363.448	297.897	263.035	234.051	249.471	373.409	312.95	350.146	348.344
4921524L21Rik	0	0	1.97612	0	0	0	0	0	0	0	0	0	0	0	0	0
4921525O09Rik	0	0	0	0	0	0	0	0	0	0	0	0	0	0	0	0
4921529L05Rik	0	0	0.988059	0	0	0	0	0	0	0	0	0	0	0	0	0
4921530L21Rik	0	0	0	0	0	0	0	0	0	0	0	0	0	0	0	0
4921531C22Rik	126.142	119.406	143.595	112.739	91.9713	131.855	107.075	103.348	110.881	100.39	93.3434	86.6264	127.838	109.011	96.6656	120.513
4921531P14Rik	0	0	0	0	0	0	0	0	0	0	0	0	0	0	0	0
4921533I20Rik	0	0	0	0	0	0	0	0	0	0	0	0	0	0	0	0
4921534H16Rik	0	0	0	0	0	0	0	0	0	0	0	0	0	0	0	0
4921536K21Rik	6.32975	0	10.8411	3.12501	8.55407	9.67855	9.66628	8.05996	3.37842	4.87599	0.957886	0.900658	7.60746	5.86187	6.97301	8.98123
4921539E11Rik	0	0	0	0	0	0	0	0	0	0	0	0	0	0	0	0
4922502B01Rik	0	0	0	0	0	0	0	0	0	0	0	0	0	0	0	0
4922502D21Rik	0	0	0	0	0	0	0	0	0	0	0	0	0	0	0	0
4922502H24Rik	0	0	0	0	0	0	0	0	0	0	0	0	0	0	0	0
4922502N22Rik	0	0	0	0	0	0	0	0	0	0	0	0	0	0	0	0
4930401C15Rik	0	0	0	0	0	0	0	0	0	0	0	0	0	0	0	0
4930401O10Rik	0	0	0	0	0	0	0	0	0	0	0	0	0	0	0	0
4930401O12Rik	0	0	0	0	0	0	0	0	0	0	0	0	0	0	0	0
4930402F06Rik	0	0	0	0	0	0	0	0	0	0	0	0	0	0	0	0
4930402F11Rik	0	0	0	0	0	0	0	0	0	0	0	0	0	0	0	0
4930402H24Rik	2531.01	2726.1	2494.47	2516.7	2493.88	2534	2746.52	2717.25	2423.86	2422.57	2340.47	2261.05	2188.77	2260.05	2156.36	2332.74
4930402K13Rik	0	0	0	0	0	0	0	0	0	0	0	0	0	0	0	0
4930404A05Rik	0	0	0	0	0	0	0	0	0	0	0	0	0	0	0	0
4930404H11Rik	5.30297	3.96622	5.94148	7.2696	10.8757	10.8466	5.73293	8.03945	6.84167	0.973158	10.5079	11.6795	6.58611	5.03984	5.77185	5.9192
4930404I05Rik	0	0	0.992017	0	4.63357	1.07338	0	3.45953	0	0	0	0.90322	0	0	0	1.00349
4930404N11Rik	6.49853	3.09267	0.996129	11.9995	2.38157	8.89396	1.8441	3.31469	1.18978	0	8.33651	1.81229	2.20965	7.50299	2.27229	0.982709
4930405A10Rik	0	0	0	0	0	0	0	0	0	0	0	0	0	0	0	0
4930405A21Rik	10.6939	12.0019	0.98731	2.06242	3.13158	2.17001	4.74103	3.42041	10.2738	7.85721	4.72731	0.906306	6.54024	5.00018	0	1.97054
4930405D11Rik	0	0	0	0	0	0	0	0	0	0	0	0	0	0	0	0
4930405J17Rik	0	0	0	0	0	0	0	0	0	0	0	0	0	0	0	0
4930405L22Rik	0	0	0	0	0	0	0	0	0	0	0	0	0	0	0	0
4930405O22Rik	0	1.96232	0	0	0	0	0	1.15955	0	0	0	0	0	0	0	0
4930406D18Rik	0	0	0	0	0	0	0	0	0	0	0	0	0	0	0	0
4930407G08Rik	0	0	0	0	2.33605	0	0	0	1.14158	0	2.8452	1.8189	1.09472	0	0	1.96463
4930407I10Rik	0	0	0	0	0	0	0	0	0	0	0	0.902975	0	0	0	0
4930407I19Rik	0	0	0	0	0	0	0	0	0	0	0	0	0	0	0	0
4930412B13Rik	0	0	0	0	0	0	0	0	0	0	0	0	0	0	0	0
4930412C18Rik	85.506	34.93	27.0642	27.5662	34.3993	27.5832	20.8685	30.37	93.1041	71.7896	51.3574	68.349	39.615	43.9692	24.8436	40.1423
4930412O13Rik	1.06138	1.99568	1.97425	9.30729	0	1.08161	2.88527	19.4119	5.69857	6.83181	10.4704	7.19491	2.17816	5.02411	3.47177	1.99019
4930413E15Rik	0	0	0	0	0	0	0	0	0	0	0	0	0	0	0	0
4930413F20Rik	2.14157	0	0	0	0	1.07875	0	2.24864	1.14739	0	1.88437	0	0	0	0	0
4930413G21Rik	4.30105	1.00676	4.02524	0	5.45888	5.37872	3.77867	4.44783	2.3305	1.95178	4.7422	0.927319	0	3.2562	4.56284	1.99282
4930413M19Rik	0	0	0	0	0	0	0	0	0	0	0	0	0	0	0	0
4930414N06Rik	0	0	0	0	0	0	0	0	0	0	0	0	0	0	0	0
4930415L06Rik	0	0	0	0	0	0	0	0	0	0	0	0	0	0	0	0
4930415O20Rik	0	0	0	0	0	0	0	0	0	0.976505	1.90575	2.71124	0	0	0	0
4930417O13Rik	0	0	0	0	0	0	0	0	0	0	0	0	0	0	0	0
4930417O22Rik	0	0	0	0	0	0	0	0	0	0	0	0	0	0	0	0
4930419G24Rik	0	0	0	0	0	0	0	0	0	0	0	0	0	0	0	0
4930422M22Rik	0	0	0	0	0	0	0	0	0	0	0	0	0	0	0	0
4930423M02Rik	0	0	0	0	0	0	0	0	0	0	0	0	0	0	0	0
4930425K10Rik	0	0	0	0	0	0	0	0	0	0	0	0	0	0	0	0
4930425L21Rik	0	0	0	0	0	0	0	0	0	0	0	0	0	0	0	0
4930425O10Rik	0	0	0	0	0	0	0	0	0	0	0	0	0	0	0	0
4930426D05Rik	0	0	0	1.04834	1.5475	0	0	0	0	0	0	0.907034	0	0.830208	0	0
4930426L09Rik	5.2795	0.993538	3.97724	6.2209	10.8886	2.16261	11.5438	13.7148	2.27827	0.972479	2.85091	12.5748	6.53324	4.17847	2.31907	7.01615
4930428D20Rik	0	0	0	0	0	0	0	0	0	0	0	0	0	0	0	0
4930428E07Rik	0	0	0	0	0	0	0	0	0	0	0	0	0	0	0	0
4930428G15Rik	0	0	0	0	0.778683	0	0	0	1.13036	0	0	0	0	0	0	0
4930428O21Rik	0	0	0	0	0	0	0	0	0	0	0	0	0	5.00364	0	0
4930429B21Rik	11.6584	9.9501	0.994931	2.07449	5.44642	5.38941	13.4389	7.98966	12.5353	7.78377	0	5.41924	1.0862	4.16001	10.3805	9.01511
4930429D17Rik	0	0	0	1.0417	0	0	0	0	0	0	0	0	1.08063	0	0	0
4930429F11Rik	0	0	0	0	0	0	0	0	0	0	0	0	0	0	0	0
4930429F24Rik	0	0	0	0	2.33605	0	0	0	0	0	0	0	0	0	0	0
4930429H19Rik	0	0	0	0	0	0	0	0	0	0	0	0	0	0	0	0
4930430A15Rik	0	0	0	0	0	0	0	0	0	0	0	0	0	0	0	0
4930430F08Rik	165.82	130.096	107.117	126.649	136.099	131.92	80.7283	95.8359	151.978	150.436	131.004	170.256	120.541	107.463	117.492	138.214
4930430F21Rik	0	0	0	0	0	0	0	0	0	0	0	0	0	0	0	0
4930430J02Rik	0	0	0	0	0	0	0	0	0	0	0	0	0	0	0	0
4930431F12Rik	0	0	0	0	0	0	1.93697	0	0	0	0	0	0	0	0	0
4930431P03Rik	0	0	0	0	0	0	0	0	0	2.83058	0	0	0	0	0	2.07184
4930431P22Rik	0	2.9961	7.93943	0	1.56243	0	3.81856	0	2.27458	1.94241	0	0	1.09119	0	5.73876	0
4930432J09Rik	1.02728	2.90139	0	0	0	0	2.99286	3.51418	1.09795	0	4.82065	0	4.24685	0	2.35582	5.15078
4930432K21Rik	15.3546	6.84482	12.5468	6.20291	20.7332	6.34945	10.7967	11.7168	17.8086	15.1635	21.3327	20.5074	9.57725	15.1133	7.12795	11.6214
4930432L08Rik	0	0	0	0	0	0	0	0	0	0	0	0	0	0	1.16301	0
4930432M17Rik	0	0	0	0	0	0	0	0	0	0	0	0	0	0	0	0
4930432O09Rik	0	0	0	0	0	0	0	0	0	0	0	0	0	0	0	0
4930433B08Rik	0	0	0	0	0	0	0	0	0	0	0	0	0	0	0	0
4930433I11Rik	0	0	0	0	0	0	0	0	0	0	0	0	0	0	0	0
4930433N12Rik	0	0	0	0	2.33605	0	0	0	0	0	0	0.902975	0	0	0	0
4930434J06Rik	0	0	0	0	0	0	0	0	0	0	0	0	0	0	0	0
4930435E12Rik	0	0	0	0	0	0	0	0	0	0	0	0	0	0	0	0
4930435F18Rik	0	0	0	0	0	0	0	0	0	0	0	0	0	0	0	0
4930438E09Rik	0	0	0	0	0	0	0	0	0	0	0	0	0	0	0	0
4930440C22Rik	0	0	0	0	0	0	0	0	0	0	0	0	0	0	0	0
4930440I19Rik	0	0	0	0	0	0	0	0	0	0	0	0	0	0	0	0
4930441H08Rik	0	0	0	0	0	0	0	0	0	0	0	0	0	0	0	0
4930441J16Rik	0	0	0	0	0	0	0	0	0	0	0	0	0	0	0	0
4930442J19Rik	0	0	0	0	0	0	0	0	0	0	0	0	0	0	0	0
4930442L01Rik	0	0	0	0	0	0	0.968483	0	0	0	0	0	0	0	0	0
4930443O20Rik	0	2.97984	2.95799	0	1.56177	0	1.9235	1.15258	1.13855	6.84713	5.76634	0.900463	0	0	3.4811	2.97671
4930444F02Rik	0	0	0	0	0	0	0	0	0	0	0	0	0	0	0	0
4930444G20Rik	0	0	0	0	0	0	0	0	0	0	0	0	0	0	0	0
4930444M15Rik	0	0	0	0	0	0	0	0	0	0	0	0	0	0	0	0
4930444P10Rik	1.05371	0	0	0	0	0	0	0	0	0	0	0	0	0.83394	0	0
4930445N18Rik	6.32314	0	0.990556	3.11638	0	0	0	1.14704	0	0.97273	3.83059	1.79754	0	1.67996	1.15974	0
4930447A16Rik	0	0	0	0	0	0	0	0	0	0	0	0	0	0	0	0
4930447C04Rik	5.31807	2.5722	4.26952	5.91852	7.57761	1.94143	3.54748	3.95133	0.986267	15.675	21.8249	10.5047	2.94343	3.92978	0	1.24579
4930447F24Rik	0	1.00176	1.98063	0	0	0	2.8706	0	1.14299	1.96537	2.84389	0	6.54767	1.67111	4.62739	4.93014
4930447J18Rik	0	0	0	0	0	0	0	0	0	0	0	0	0	0	0	0
4930447K03Rik	7.35792	1.96966	0	1.04814	0	1.07673	2.91015	0	1.12852	0	0.959421	10.7775	0	4.18141	1.16337	1.00448
4930447M23Rik	9.36421	4.88612	2.98949	8.42089	9.22904	3.20295	3.9321	1.16162	10.0595	7.701	12.547	9.8929	6.47452	5.83301	3.52574	9.11892
4930447N08Rik	1.04486	0	0	2.08987	0	0	0	2.30604	0	0	0	0	0	0	0	0
4930448C13Rik	0	0	0	0	0	0	0	0	0	0	0	0	0	0	0	0
4930448F12Rik	0	0	0	0	0	0	0	0	0	0	0	0	0	0	0	0
4930448H16Rik	0	0	0	0	0	0	0	0	0	0	0	0	0	0	0	0
4930448I06Rik	0	0	0	0	0	0	0	0	0	0	0	0	0	0	0	0
4930448I18Rik	0	0	0	0	0	0	0	0	0	0	0	0	0	0	0	0
4930448K20Rik	0	0	0	0	0	0	0	0	0	0	0.95638	0	0	0	0	0
4930449E01Rik	0	0	0	0	0	0	0	0	0	0	0	0	0	0	0	0
4930449E18Rik	0	0	0	0	0	0	0	0	0	0	0	0	0	0	0	0
4930449I24Rik	0	0	0	0	0	0	0	0	0	0	0	0	0	0	0	0
4930451G09Rik	28.7372	26.8385	30.5451	37.3141	21.0945	17.2371	40.3497	51.5044	23.7779	21.6445	36.0872	19.0421	22.7943	30.0376	19.7323	18.8413
4930451I11Rik	0	0	0	0	0	0	0	0	0	0	0	0	0	0	0	0
4930452A19Rik	0	0	0	0	0	0	0	0	0	0	0	0	0	0	0	0
4930452B06Rik	41.0166	34.4943	59.5589	77.3582	27.1322	41.7444	39.9094	82.8792	26.9915	20.4136	32.6069	28.051	43.2103	46.5968	47.8445	34.1666
4930452G13Rik	0	0	0	0	0	0	0	0	0	0	0	0	0	0	0	0
4930452N14Rik	0	0	0	0	0	0	0	0	0	0	0	0	0	0	0	0
4930453H23Rik	0	0	0	0	0	0	0	0	0	0	0	0	0	0	0	0
4930453L07Rik	0	0	0.993671	0	0	1.06859	0	0	0	0	0	0	0	0	0	0
4930453N24Rik	489.288	492.077	406.658	558.315	526.471	609.657	573.679	634.718	478.485	422.587	394.513	402.723	434.593	565.487	546.892	461.176
4930455B14Rik	0	0	0	0	0	0	0	0	0	0	0	0	0	0	0	0
4930455C13Rik	0	0	0	0	0.778683	0	0	0	0	0	0.958917	0	0	0	0	3.00332
4930455D15Rik	0	0	0	0	0	0	0	0	0	0	0	0	0	0	0	0
4930455F16Rik	0	0	0	0	0	0	0	0	0	0	0	0	0	0	0	0
4930455G09Rik	25.645	23.9019	19.8152	25.8454	38.1566	42.3653	38.8813	34.31	13.7372	30.4201	20.844	29.9432	41.6117	50.9307	28.8631	63.7632
4930455H04Rik	6.25232	1.95776	12.0722	0	7.68921	5.34808	4.95876	0	1.12009	9.57215	8.69631	2.6889	5.40038	8.32824	7.05824	4.07098
4930455J16Rik	0	0	0	0	0	0	0	0	0	0	0	0	0	0	0	0
4930456L15Rik	0	0	0	0	0	0	0	0	0	0	0	0	0	0	0	0
4930459C07Rik	0	0	0	0	0	4.29862	0	0	0	0	0	0	0	0	0	0
4930459L07Rik	0	0	0	0	0	0	0	0	0	0	0	0	0	0	0	0
4930461G14Rik	0	0	0	0	0	0	0	0	0	0	0	0	0	0	0	0
4930463O16Rik	0	0	0	0	0	0	0	0	0	0	0	0	0	0	0	0
4930465K10Rik	2.10742	0	0	0	0	0	0	0	0	0	6.68603	0	0	0	0	2.01011
4930465M20Rik	0	0	0	0	0	0	0	0	0	0	0	0	1.08063	0	0	0
4930467D21Rik	0	0	0	0	0	0	0	0	0	0	0	0	0	0	0	0
4930467E23Rik	0	0	0	0	0	0	0	2.29376	0	3.76963	4.94097	0	0	0	0	0
4930467J12Rik	0	0	0	0	0	0	0	0	0	0	0	0	0	0	0	0
4930467K11Rik	0	0	0	0	0	0	0	0	0	0	0	0	0	0	0	0
4930469K13Rik	0	0	0	0	0	0	0	0	0	0	0	0	0	0	0	0
4930470G03Rik	4.18265	1.97212	1.00695	0	5.41821	1.07543	0	0	4.5003	6.75276	0	0	1.08152	0	2.357	0
4930470H14Rik	0	0	0	0	0	0	0	0	0	0	0	0	0	0	0	0
4930470O06Rik	0	0	0	0	0	0	0	0	0	0	0	0	0	0	0	0
4930470P17Rik	0	0	0	0	0	0	0	0	0	0	0	0	0	0	0	0
4930471C04Rik	2.11757	0	0	0	0	0	0	1.14139	0	0	0	0	0	2.52962	0	0.992729
4930471G03Rik	0	0	2.9913	0	0.786785	0	0.948255	1.14878	2.29972	1.9599	1.89361	6.33995	5.48842	2.51064	3.43864	2.94861
4930471G24Rik	1.05371	0	0	0	0	0	0	0	0	0	0	0	0	0	0	0
4930471M09Rik	0	0	0	0	0	1.05305	0.988358	0	0	0	0	0	0	0	1.16301	0
4930473A02Rik	0	0	0.988059	0	0	0	0	0	0	0	0	0	0	0	0	2.00752
4930473O22Rik	0	0	0	0	0	0	0	0	0	0	0	0	0	0	0	0
4930474G06Rik	0	0	0	0	0	0	0	0	0	0	0	0	0	0	0	0
4930474H20Rik	0	0	0	0	0	0	0	0	0	0	0	0	0	0	0	0
4930474M22Rik	0	0	0	0	0	0	0	0	0	0	0	0	0	0	0	0
4930474N05Rik	0	0	0	0	0	0	0	0	0	0	0	0	0	0	0	0
4930474N09Rik	1.05932	0	0.987597	2.07586	0.777741	0	0	0	0	0	2.85818	0	0	2.51142	0	0
4930477N07Rik	0	0	0	0	0	0	0	0	0	0	0	0	0	0	0	0
4930478L05Rik	0	0	0	0	0	0	0	0	0	0	0	0	0	0	0	0
4930478P22Rik	0	0	0	0	0	0	0	0	0	0	0	0	0	0	0	0
4930479D17Rik	3.1921	0.99427	1.97433	1.0361	0	1.08747	0.950934	1.14768	0	0	0	1.79909	0	2.51136	0	0
4930480E11Rik	0	0	0	0	0	0	0	0	0	0	0	0	0	0	0	0
4930480G23Rik	0	0	0	0	0	0	0	0	0	0	0	0	0	0	0	0
4930480K15Rik	0	0	0	0	0	0	0	0	0	0	0	0	0	0	0	0
4930480K23Rik	85.0122	97.4044	85.891	104.453	83.8623	62.0999	93.1148	126.903	103.935	118.834	96.6162	101.271	37.1762	126.968	112.05	94.6209
4930480M12Rik	0	0	0	0	0	0	0	0	0	0	0	0	0	0	0	0
4930481A15Rik	612.097	515.223	499.337	425.433	302.645	286.646	375.629	334.726	486.171	442.586	497.871	515.282	469.685	375.604	311.577	411.595
4930482G09Rik	0	0	0	0	1.55737	0	0	0	0	0	0	0	1.08349	0.831743	0	0
4930483J18Rik	0	0	0	0	0	1.07501	0	1.14651	0	0	2.8559	0	2.17129	0	0	0
4930483K19Rik	0	0	0	0	0	0	0	0	0	0	0	0	0	0	0	0
4930483O08Rik	0	0	0	0	0	0	0	0	0	0.973758	0	0	0	0	0	0
4930484H19Rik	0	0	0	2.08341	0	0	0	0	0	0	0	0	0	0	0	0
4930486F22Rik	0	0	0	0	0	0	0	0	0	0	0	0	0	0	0	0
4930486I03Rik	0	0	0	0	0	0	0	0	0	0	0	0	0	0	0	0
4930486L24Rik	67.3692	43.3346	48.5647	36.6018	41.083	39.7756	26.1332	26.5385	37.2111	39.8126	32.6171	24.2353	28.3235	22.6314	29.0135	49.0422
4930487D11Rik	0	0	0	0	0	0	0	0	0	0	0	0	0	0	0	0
4930487H11Rik	0	0	0	0	0	0	0	0	0	0	0	0	0	0	0	0
4930488B22Rik	0	0	0	0	0	0	0	0	0	0	0	0	0	0	0	0
4930488L21Rik	0	0	0	0	0	0	0	0	0	0	0.95638	0	0	0	0	0
4930500F04Rik	0	0	0	0	0	0	0	0	0	0	0	0	0	0	0	0
4930500G05Rik	0	0	0	0	0	0	0	0	2.26072	0	0	0	0	0	0	0
4930500L23Rik	0	0	0	0	0	0	0	0	0	0	0	0	0	0	0	0
4930502A04Rik	0	0	0	0	0	0	0	0	0	0	0	0	0	0	0	0
4930502E09Rik	0	0	0	0	0	0	0	0	0	0	0	0.902975	0	0	0	0
4930502E18Rik	1.03501	0	5.01717	0	3.05816	0	0.988834	0	0	0	2.87899	4.45125	0	0	3.50432	6.06119
4930503B20Rik	0	0	0	2.08341	0	0	0	0	0	5.7786	0	0	3.26887	1.67242	0	0
4930503E14Rik	0	0	0	0	0	0	0.968483	0	0	0	0.970063	0	6.08607	0	0	2.10855
4930503E24Rik	0	0	0	0	0	0	0	0	0	0	0.95638	0	0	0	0	0
4930503F20Rik	0	0	0	0	0	0	0	0	0	0	0	0	0	0	0	0
4930503H13Rik	0	0	0	0	0	0	0	0	0	0	0	0	0	0	0	0
4930503L19Rik	122.199	123.933	88.4936	137.079	146.32	132.028	164.703	110.205	98.5221	141.623	130.325	153.328	114.244	136.457	137.378	158.738
4930503O07Rik	0	0	0	0	0	0	0	0	0	0	0	0	0	0	0	0
4930504C09Rik	0	0	0	0	0	0	0	0	0	0	0	0	0	0	0	0
4930504O13Rik	0	0	0	0	0	0	0	0	0	0	0	0	0	0	0	0
4930505A04Rik	0	2.96393	0	0	0	1.07922	1.93662	0	0	1.94176	1.90897	0.900097	2.1776	2.50335	0	0
4930505G20Rik	0	0	0	0	0	0	0	0	0	0	0	0	0	0	0	0
4930505K13Rik	0	0	0	0	0	0	0	0	0	0	0	0	0	0	0	0
4930505K14Rik	0	0	0	0	0	0	0	0	0	0	0	0	0	0	0	0
4930505N22Rik	0	0	0	0	0.778683	0	0	0	0	0	0.949474	0.925511	2.19727	2.48187	0	0.978077
4930506A18Rik	0	0	0	0	0	0	0	0	0	0	0	0	0	0	0	0
4930506C21Rik	1.06123	0	0.985742	0	0.777491	0	0	1.14319	0	2.94367	0.953255	0	5.47328	0	5.79116	0.990653
4930507D05Rik	5.34302	0	1.97669	7.22407	2.35033	9.76491	7.64452	9.10912	1.14586	0.979305	5.70224	0	3.27176	1.66962	3.45939	7.9131
4930507D10Rik	0	0	0	0	0	0	0	0	0	0	0	0	0	0	0	0
4930509E16Rik	1.04436	2.94409	0	1.07525	2.30968	2.1479	0	0	3.38454	4.8449	0	2.7258	0	1.66895	0	0
4930509G22Rik	0	8.69598	4.99318	13.7424	6.85299	9.51126	11.8959	4.66539	7.73922	10.5244	2.91073	1.80497	2.13811	5.79737	4.74352	4.11303
4930509J09Rik	0	0	0	0	0	0	0	0	0	0	0	0	0	0	0	0
4930509K18Rik	0	0	0	0	0	0	0	0	0	0	0	0	0	0	0	0
4930511A02Rik	1.05371	0	0	0	0	0	0	0	0	0	0	0	0	0	0	0
4930511A08Rik	0	1.99315	2.97458	0	0.777078	0	0	2.27994	0	0	0	0	4.44207	0.838341	0	2.91486
4930511E03Rik	0	0	0	0	0	0	0	0	0	0	0	0	0	0	0	0
4930511M06Rik	0	0	0.993266	0	2.28463	2.11502	4.93352	1.16357	1.13072	0	0	0	1.02239	3.39349	4.83188	0
4930512B01Rik	0	0	0	0	0	2.13846	0	1.1527	0	0	0	0	0	0	0	0
4930512J16Rik	0	0	0	0	0	3.23214	0	4.57593	0	0	0	0.896673	7.63545	0	2.32057	0
4930512M02Rik	0	0	0	0	0	0	0	0	0	0	0	0	0	0	0	0
4930513D17Rik	0	0	0	0	0	0	0	0	0	0	0	0	0	0	0	1.00376
4930513N10Rik	7.44333	1.99403	2.98618	5.17499	8.56288	5.3892	3.83799	12.5102	2.2862	4.86681	4.76796	9.0648	7.60591	8.30869	5.76869	13.9752
4930513O06Rik	0	0	0	0	0	0	0	0	0	0	0	0	0	0	0	0
4930515B02Rik	0	0	0	0	0	0	0	0	0	0	0	0	0	0	0	0
4930515G01Rik	4.27733	7.02475	3.95536	5.14143	5.48078	9.77874	2.84904	4.53745	6.9213	4.90403	0.951049	0	0	5.01756	6.90932	3.95602
4930515G16Rik	0	0	0	0	0	0	0	0	0	0	0	0	0	0	0	0
4930515L03Rik	0	0	0	0	0	0	0	0	0	0	0	0	0	0	0	0
4930515L19Rik	0	0	0	0	0	0	0	0	0	0	0	0	0	0	0	0
4930517E11Rik	0	0	0	0	0	0	0	0	0	0	0	0	0	0	0	0
4930517M08Rik	0	0	0	0	0.775214	1.07946	0	0	0	0	0	0	0	0	0	0
4930518J21Rik	0	0	0	0	0	0	0	0	0	0	0	0	0	0	0	0
4930518P08Rik	0	0	0	0	0	0	0	0	0	0	0	0	0	0	0	0
4930519D14Rik	0	0	0	0	0	0	0	0	0	0	0	0	0	0	0	0
4930519F16Rik	0	0	0	0	0	0	0	0	0	0	0	0	0	0	0	0
4930519F24Rik	0	0	0	0	0	0	0	0	0	0	0	0	0	0	0	0
4930519G04Rik	0	0	0	0	0	0	0	0	0	0	0	0	0	0	0	0
4930519H02Rik	0	0	0	0	0	0	0	0	0	0	0	0	0	0	0	0
4930519K11Rik	0	0	0	0	0	0	0	0	0	0	0	0	0	0	0	0
4930519L02Rik	0	0	0	0	0	0	0	0	0	0	0	0	0	0	0	0
4930520O04Rik	8.69202	10.244	7.13329	5.3517	7.22878	2.23409	5.93591	5.22009	5.34981	3.02657	6.95479	6.51126	0	9.53062	5.98207	11.2498
4930520P13Rik	0	0	0	0	0	0	0	0	0	0	0	0	0	0	0	0
4930521E06Rik	0	0	0	0	0	0	0	0	0	0	0	0	0	0	0	0
4930521O11Rik	0	0	0	0	0	0	1.93697	0	0	0	0	0	0	0	0	1.00376
4930521O17Rik	0	0	0	0	0	0	0	0	0	0	0	0	0	0	0	0
4930522H14Rik	0	0	0	0	0	0	0	0	0	0	0	0	0	0	0	0
4930522O17Rik	0	0	0	0	0	0	0	0	1.13036	0	0	0	0	0	0	0
4930522P08Rik	0	0	0	1.03478	1.57165	0	0	2.28813	0	1.98662	1.8857	0	2.23893	2.52222	1.14835	3.8716
4930523C07Rik	437.288	366.695	445.349	649.526	484.624	490.631	449.137	557.681	385.059	422.862	424.859	402.8	483.899	424.329	461.815	423.366
4930523O13Rik	0	0	0	0	0	0	0	0	0	0	0	0	0	0	0	0
4930524B15Rik	0	0	1.97612	0	0	0	0	0	0	0	3.79231	0	0	0	0	1.01255
4930524B17Rik	0	0	0	0	0	0	0	0	0	0	0	0	0	0	0	0
4930524C18Rik	0	0	0	0	0	0	0	0	0	0	0	0	0	0	0	0
4930524N10Rik	0	0	0	0	0	0	0	0	0	0	0	0	0	0	0	0
4930524O05Rik	0	0	0	0	0	0	0	0	0	0	0	0	0	0	0	0
4930524O08Rik	0	0	0	0	0	0	0	0	0	0	0	0	0	0	0	0
4930525C09Rik	0	0	0	0	0	0	0	0	0	0	0	0	0	0	0	0
4930525D18Rik	0	0	0	0	2.33605	0	0	0	0	1.9497	0	0.901706	0	0	3.49001	0
4930525G20Rik	5.17082	5.83725	11.0741	8.46962	7.6475	29.7633	7.89255	9.30216	12.2696	6.72374	6.74168	12.5713	8.59472	12.4482	9.40602	8.23651
4930526H09Rik	0	0	0	0	0	0	0	0	0	0	0	0	0	0	0	0
4930526I15Rik	81.1362	77.1874	106.722	67.8362	63.3908	72.8571	48.6564	40.7794	57.148	65.8237	70.9405	49.9335	96.0248	81.0524	97.9148	61.3888
4930526L06Rik	1.05957	0	0	0	0	0	0.961903	1.14835	0	0	0	2.70892	0	0	0	0
4930527F14Rik	0	0	0	0	0	0	0	0	0	0	0	0	0	0	0	0
4930527G23Rik	0	0	0	0	0	0	0	0	0	0	0	0	0	0	0	0
4930528A17Rik	5.13115	0.968527	17.134	2.12379	7.62606	5.29391	15.927	2.33916	8.844	4.77533	1.93607	0	6.39155	2.47482	5.93708	3.11518
4930528D03Rik	0	0	0	0	0	0	0	0	0	0.973758	0	0	0	0	0	0
4930528G23Rik	0	0	0	0	0	0	0	0	0	0	0	0	0	0	0	0
4930528H21Rik	0	0	0	0	0	0	0	0	0	0	0	0	0	0	0	0
4930528P14Rik	0	0	0	0	0	0	0	0	0	0	0	0	0	0	0	0
4930529C04Rik	0	0	0	0	0	0	0	0	0	0	0	0	0	0	0	0
4930529K09Rik	0	0	0	0	0	0	0	0	0	0	0	0	0	0	0	0
4930529L06Rik	0	0	0	0	0	0	0	0	0	0	0	0	0	0	0	0
4930529N20Rik	0	0	2.96418	0	0	0	0	0	1.14699	0.959643	0	0	0	0	0	0
4930532I03Rik	0	0	0	0	0	0	0	0	0	0	0	0	0	0	0	0
4930532M18Rik	0	0	0	0	0	0	0	0	0	0	0	0	0	0	0	0
4930533B01Rik	0	0	0	0	0	0	0	0	0	0	0	0	0	0	0	0
4930533N22Rik	0	0	0	0	0	0	0	0	0	0	0	0	0	0	0	0
4930533P14Rik	0	0	0	0	0	0	0	0	0	0	0	0	0	0	0	0
4930534H03Rik	0	0	0	0	0	0	0	0	0	0	0	0	0	0	0	0
4930539C22Rik	0	0	0	0	0	0	0	0	0	0	0	0	0	0	0	0
4930539E08Rik	5.29414	10.9611	2.96846	3.10535	1.56058	5.39512	3.84964	3.42602	1.13812	3.90131	13.3138	7.20778	13.0397	1.67172	1.1584	3.99719
4930539J05Rik	8.5812	4.02318	5.99745	1.02587	7.796	3.28019	4.68289	6.79331	0	1.95988	0	3.64087	2.20109	5.83225	3.43859	2.96023
4930539M17Rik	0	0	0	0	0	0	0	0	0	0	0	0	0	0	0	0
4930539N22Rik	0	0	0	0	0	0	0	0	0	0	0	0	0	0	0	0
4930540M03Rik	0	0	0	0	0	0	0	0	0	0	0	0	0	0	0	0
4930542C21Rik	0	0	0	0	0	0	0	1.14688	0	0	0	0	0	0	0	0
4930542D17Rik	0	0	0	0	0	0	0	0	0	0	0	2.70892	0	0	0	0
4930542M03Rik	0	0	0	0	0	0	0	0	0	0	0	0	0	0	0	0
4930543E12Rik	0	0	0	0	0	0	0	0	0	0	0	0	0	0	0	0
4930543N07Rik	0	0	0	0	0	0	0	0	0	0	0	0	0	0	0	0
4930544D05Rik	0	0	0	0	0	0	0	0	0	0	0	0	1.08063	0	0	0
4930544G11Rik	0	0	0	0	0	0	0	0	0	0	0	0	0	0	2.32602	0
4930544M13Rik	0	0	0	0	0	0	0	0	0	0	0	0	0	0	0	0
4930545E07Rik	0	0	0	0	0	0	0	0	0	0	0	0	0	0	0	0
4930545H06Rik	0	0	0	0	0	0	0	0	0	0	0	0	0	0	0	0
4930545L23Rik	0	0	0	0	0	0	0	0	0	0	0	0	3.2419	0	0	0
4930546C10Rik	0	0	0	0	0	0	0	0	0	0	0	0	0	0	0	0
4930546K05Rik	1.05229	0.987519	4.95116	0	0.775589	1.07556	2.9141	1.1513	5.64919	1.94407	0	4.48841	3.26033	1.67526	0	1.00178
4930547E08Rik	0	0	0	0	0	0	0	0	0	0	0	0	0	0	0	0
4930547E14Rik	0	0	0	0	0	0	0	0	0	0	0	0	0	0	0	0
4930548G14Rik	0	0	0	0	0	0	0	0	0	0	0	0	0	0	0	0
4930548H24Rik	0	0	0	0	0	0	0	0	0	0	0.957946	0	0	1.6837	0	0.992707
4930548J01Rik	0	0	0	0	0	0	0	0	0	0	0	0	0	0	0	0
4930548K13Rik	0	0	0	0	0	0	0	0	0	0	0	0	0	0	0	0
4930549C15Rik	0	0	0	0	0	0	0	0	0	0	0	0	0	0	0	0
4930549G23Rik	0	0	0	0	0	0	0	0	0	0	0	0	0	0	0	0
4930550C14Rik	10.4563	10.7805	11.0351	9.45053	7.68851	3.21184	5.85121	4.61606	6.77643	4.81528	13.4526	8.03828	7.62297	0.837091	9.30518	6.06204
4930550C17Rik	0	0	0	0	0	0	0	0	0	0	0	0	0	0	0	0
4930550L24Rik	0	0	0	0	0	0	0	0	0	0	0	0	0	0	0	0
4930552N02Rik	0	0	0	0	0	0	0	0	0	0	0	0	0	0	0	0
4930552P12Rik	32.8948	32.7467	36.4498	19.7238	24.1835	23.7266	28.8604	39.01	36.1934	42.1504	45.7403	35.217	40.2415	25.9319	42.9244	41.7103
4930553C11Rik	0	0	0	0	0	0	0	0	0	0	0	0	0	0	0	0
4930553E22Rik	0	0	0	0	0	0	0	0	0	0	0	0	0	0	0	0
4930553J12Rik	0	0	0	0	0	0	0	0	0	0	0	0	0	0	0	0
4930553P18Rik	1.04773	3.93241	5.9772	7.33448	3.08825	1.07204	1.94586	1.15502	1.12592	0.969375	2.87298	0.899858	0	11.6634	3.5015	2.02367
4930554C24Rik	0	0	0	0	0	0	0	0	0	0	0	0	0	0	0	0
4930554G24Rik	0	0	0	0	0	0	0	0	0	0	0	0	0	0	0	0
4930554H23Rik	0	0	0	0	0	0	0	0	0	0	0	0	0	0	0	0
4930554I06Rik	0	0	0	0	0	0	0	0	0	0	0	0	0	0	0	0
4930555B11Rik	0	0	0	0	0	0	0	0	0	0	0	0	0	0	0	0
4930555B12Rik	0	0	0	0	0	0	0	0	0	0	0	0	0	0	0	0
4930555G01Rik	0	0	3.0504	0	0.752621	2.09551	0	1.18266	0	0	0	1.77656	0	4.852	2.35713	1.03837
4930555G21Rik	0	0	0	0	0	0	0	0	0	0	0	0	0	0	0	0
4930555K05Rik	0	0	0	0	0	0	0	0	0	0	0	0	0	0	0	0
4930555K19Rik	0	0	0	0	0	0	0	0	0	0	0	0	0	0	0	0
4930556C24Rik	0	0	0	0	0	0	0	0	0	0	0	0	0	0	0	0
4930556G01Rik	0	0	0	0	0	0	0	0	0	0	0	0	0	0	0	0
4930556J02Rik	0	0	0	0	0	0	0	0	0	0	0	0	0	0	0	0
4930556L07Rik	0	0	0	0	0	0	0	0	0	0	0	0	0	0	0	0
4930556M19Rik	14.4915	8.73782	13.5926	16.4361	9.15959	5.29372	5.71845	10.2009	13.561	11.6647	16.3233	12.4701	20.6877	9.2294	5.82175	11.0069
4930556N09Rik	0	0	0	0	0	0	0	0	0	0	0	0	0	0	0	0
4930556N13Rik	0	0	0	0	0	0	0	0	0	0	0	0	0	0	0	0
4930557F10Rik	0	0	0	0	0	0	0	0	0	0	0	0	0	0	0	0
4930557J02Rik	0	0	0	0	0	0	0	0	0	0	0	0	0	0	0	0
4930557K07Rik	0	0	0	0	0	0	0	0	0	0	0	0	0	0	0	0
4930558C23Rik	0	0	0	0	0	0	0	0	0	0	0	0	0	0	0	0
4930558F17Rik	0	0	0	0	0	0	0	0	0	0	0	0	0	0	0	0
4930558G05Rik	0	0	0	0	0	0	0	0	0	0	0	0	0	0	0	0
4930558J18Rik	0	0.975585	0	1.05923	0	0	0	0	0	0	0	0	0	0	0	0
4930558K02Rik	0	0	0	0	0	0	0	0	0	0	0	0	0	0	0	0
4930559C10Rik	0	0	0	0	0	0	0	0	0	0	0	0	0	0	0	0
4930562C15Rik	0	0	3.95224	0	0	0	0	0	0	0	1.90816	1.8103	0	0	0	0
4930562F07Rik	0	0	0	0	3.05891	0	0	1.16781	0	0	0.95638	0	0	0	0	0
4930563E18Rik	2.09789	4.93039	0	0	0	9.68116	0	2.3158	0	0.961605	0.959031	0	3.25231	0.834877	2.32701	2.01765
4930563E22Rik	22.6707	22.3906	23.1349	16.9139	15.2997	8.50585	17.8276	10.4736	23.3878	24.866	24.1243	20.7096	16.0511	25.6576	20.0896	20.6481
4930563F08Rik	0	0	0	0	0	0	0	0	0	0	0	0	0	0	0	0
4930563H07Rik	0	0	0	0	0	0	0	0	0	0	0	0	0	0	0	0
4930563J15Rik	0	0	0	0	0	0	0	0	0	0	0	0	0	0	0	0
4930563M20Rik	0	0	0	0	0	0	0	0	0	0	0	0	0	0	0	0
4930563M21Rik	0	0	0	0	0	0	0	0	0	0	0	0	0	0	0	0
4930564C03Rik	0	0	0	0	0	0	0	0	0	0	0	0	0	0	0	0
4930564D02Rik	0	0	0	0	0	0	0	0	0	0	0	0	0	0	0	0
4930565D16Rik	0	0	0	0	0	0	0	0	0	0	0	0	0	0	0	0
4930565N06Rik	1.05179	0.993814	0	0	0	0	0	0	0	0	0	0	0	0	2.30031	2.02995
4930567H12Rik	0	1.98545	15.7604	1.03526	0.779725	1.08243	0	0	3.39592	4.89346	0.948925	0	0	1.67012	0	0
4930567H17Rik	0	0	0	0	0	0	0	0	0	0	0	0	0	0	0	0
4930567J20Rik	0	0	0	0	0	0	0	0	0	0	0	0	0	0	0	0
4930567K12Rik	0	0	0	0	0	0	0	0	0	0	0	0	0	0	0	0
4930567K20Rik	0	0	0	0	0	0	0	0	0	0	0	0	0	0	0	0
4930568D16Rik	0	0	0	0	0	0	0	0	0	0	0	0	0	0	0	0
4930568E12Rik	0	0	0	0	0	0	0	0	0	0	0	0	0	0	0	0
4930568G15Rik	0	0	0	0	2.33605	0	0	0	0	0	0	0	0	0	0	0
4930570G19Rik	3.92249	8.55006	8.24729	0	14.2161	0.713709	2.80956	8.76614	10.8541	3.57125	10.3177	17.9818	15.9703	2.91163	13.4103	8.63123
4930571K23Rik	0	0	0	0	0	0	0	0	0	0	0	0	0	0	0	0
4930571O06Rik	0	0	0	0	0	0	0	0	0	0	0	0	0	0	0	0
4930572K03Rik	0	0	0	0	0	0	0	0	0	0	0	0	0	0	0	0
4930572O03Rik	0	0	0	0	0	0	0	0	0	0	0	0	0	0	0	0
4930572O13Rik	0	0	0	0	0	0	0	0	0	0	0	0	0	0	0	0
4930573H18Rik	0	0	0	0	0	0	0	0	0	0	0	2.70892	0	0	0	0
4930573O16Rik	0	0	0	0	0	0	0	0	0	0	0	0	0	0	0	0
4930577N17Rik	20.128	11.9639	10.102	25.9621	18.5823	21.3893	22.2436	36.0642	11.4718	26.0024	21.1709	25.941	20.3525	9.75014	19.6604	21.1815
4930578C19Rik	115.2	106.793	155.809	168.27	143.29	139.096	173.741	208.433	114.109	94.7678	113.214	127.767	175.595	182.78	146.745	144.003
4930578E11Rik	0	0	0	0	0	0	0	0	0	0	0	0	0	0	0	0
4930578G10Rik	1.06989	3.99679	3.95134	0	10.9354	4.33409	3.79123	3.39966	1.15041	12.744	2.8494	22.7435	3.27871	4.99351	1.14935	3.9265
4930578I06Rik	0	0	0	0	0	0	0	0	0	0	0	0	0	0	0	0
4930578L24Rik	9.30744	0	3.99806	4.21028	8.42657	12.7404	10.8187	11.5829	11.1578	19.2272	7.71079	5.39942	19.3359	8.30764	4.7007	2.0497
4930578M01Rik	2.12389	11.923	1.97358	3.10972	6.22871	5.42673	1.91103	1.14751	4.55945	0.975716	5.72349	0.899609	4.38223	5.87531	1.15583	6.90073
4930578N18Rik	0	0	0	0	0	0	0	0	0	0	0	0	0	0	0	0
4930579D09Rik	0	0	0	0	0	0	0	0	0	0	0	0	0	0	0	0
4930579F01Rik	0	0	0	0	0	0	0	0	0	0	0	0	0	0	0	1.00376
4930579G18Rik	0	0	0.988059	0	0	0	0	0	0	0	0	0	0	0	0	0
4930579G24Rik	38.2844	31.2072	55.0175	47.4487	52.2087	33.0122	54.3642	44.1786	31.1861	32.587	35.772	31.4983	44.0559	39.0733	38.9059	29.646
4930579H20Rik	0	0	0	0	0	0	0	0	0	0	0	0	0	0	0	0
4930579J19Rik	0	0	0	0	0	0	0	0	0	0	0	0	0	0	0	0
4930579K19Rik	3.05147	8.70203	2.02749	3.1951	4.55131	6.3538	2.99323	4.70019	0	1.88203	3.88276	4.51958	2.11483	6.55472	4.74803	1.04187
4930579P08Rik	0	0	0	0	0	0	0	0	0	0	0	0	0	0	0	0
4930581F22Rik	38.1317	42.6008	18.7694	45.7406	28.0348	30.1322	28.9517	20.6525	28.278	27.383	50.5421	40.6032	39.1219	36.7785	23.2269	33.8612
4930583I09Rik	0	0	0	0	0	0	0	0	0	0	0	0	0	0	0	0
4930583K01Rik	0	2.96258	0	0	2.32047	0	0	1.15981	0	0	0	0	0	1.66788	0	0
4930583P06Rik	0	0	0	0	0	0	0	0	0	0	0	0	0	0	0	0
4930584F24Rik	0	0	0	0	0	0	0	0	0	0	0	0	0	0	0	0
4930586N03Rik	0	0	0	0	0	0	0	0	0	0	0	0	0	0	0	0
4930587E11Rik	0	0	0	0	0	0	0	0	0	0	0	0	0	0	0	0
4930589L23Rik	0	0	0	0	0	0	0	0	0	0	0	0.902975	0	0	0	0
4930590A17Rik	0	0	0	0	0	0	0	0	0	0	0	0	0	0	0	0
4930590J08Rik	2.11559	0	0	0	9.34038	0	0	5.71462	2.27328	1.96102	0.955814	1.80529	0	0	3.48347	1.98775
4930590L20Rik	0	0	0	0	0	0	0	0	0	0	0	0	0	0	0	0
4930591A17Rik	0	0	0	0	0	0	0	0	0	0	0	0	0	0	0	0
4930591E09Rik	0	0	0	0	0	0	0	0	0	0	0	0	0	0	0	0
4930592A05Rik	0	0	0	0	0	0	0	0	0	0	0	0	0	0	0	0
4930592C13Rik	0	0.97419	0	0	0	2.13686	1.95684	1.16272	0	0	0	0	0	0.829297	2.33904	0
4930592I03Rik	0	0	0	0	0	0	0	0	0	0	0	0	0	0	0	0
4930593A02Rik	0	0	0	0	0	0	0	0	0	0	0	0	0	0	0	1.00376
4930593C16Rik	0	0	0	0	0	0	0	0	0	0	0	0	0	0	0	0
4930594C11Rik	0	7.82727	0	0	1.54022	1.06948	2.99299	0	0	0	1.91684	0	1.06565	0	1.16516	1.01384
4930594M22Rik	10.4186	4.89188	2.01133	8.45607	12.308	12.604	1.97002	12.7559	1.11937	1.92677	10.5818	8.98998	6.45944	4.15138	9.36596	8.19713
4930594O21Rik	0	0	0	0	0	0	0	0	3.39108	0	0	0	0	0	0	0
4930595D18Rik	0	0	0	0	0	0	0	0	0	0	0	0.902975	0	0	0	0
4930595M18Rik	0	0	0	0	0	0	0	0	0	0	0	0	0	0	0	0
4930596D02Rik	0	0	0	0	0	0	0	0	0	0	0	0	0	0	0	0
4930596I21Rik	0	0	0	0	0	0	0	0	0	0	0	0	0	0	0	0
4930597A21Rik	0	0	0	0	1.55737	0	0	0	0	0	0	0	0	0	0	0
4930597G03Rik	0	0	0	0	0	0	0	0	0	0	0	0	0	0	0	0
4930598F16Rik	0	0	0	0	0	0	0	0	0	0	0	1.80595	0	0	0	0
4930599N23Rik	1.06961	14.0371	7.91001	10.2632	3.12383	11.9533	14.1613	0	11.5434	3.91661	4.73998	9.05798	1.09491	3.33707	2.29282	1.96783
4931402G19Rik	0	0	0	0	0	0	0	0	0	0	0	0	0	0	0	0
4931403E22Rik	0	0	0	0	0	0	0	0	0	0	0	0	0	0	0	0
4931403G20Rik	0	0	0	0	0	0	0	0	0	0	0	0	0	0	0	0
4931406B18Rik	0	0	0	0	0	0	0.968483	0	0	0	0	0	0	0	0	0
4931406C07Rik	381.591	303.623	363.948	409.115	481.442	489.218	335.615	383.443	368.875	352.298	378.285	274.428	349.735	322.301	297.613	376.297
4931406H21Rik	5.31259	1.98837	2.95882	2.07538	0	1.07833	0.96165	2.29103	1.13538	0.982258	0.953402	0	0	0	3.48277	0.995553
4931406P16Rik	1582.01	1482.56	1814.12	1930.15	2051.01	1863.39	1942.15	1985.16	1314.64	1451.41	1462.59	1499.13	1879.65	1509.66	1737.18	1755.9
4931408C20Rik	0	0	0	0	0	0	0	0	0	0	0	0	0	0	0	0
4931408D14Rik	2.11321	1.97912	5.93364	0	7.7859	0	3.86986	0	15.7837	3.9015	5.73822	4.50704	3.25762	1.67294	4.64788	2.99847
4931409K22Rik	1.05371	0	0	0	0	0	0	0	0	0	3.03631	0	0	5.34102	1.02956	0
4931414P19Rik	166.566	144.26	177.97	142.219	143.906	191.889	150.232	134.294	113.514	121.649	138.76	92.4978	130.962	117.374	167.081	145.403
4931417E11Rik	0	0	0	0	0	0	0	0	0	0	0	0	0	0	0	0
4931419H13Rik	0	0	0	0	0	0	0	0	0	0	0	0	0	0	0	0
4931420L22Rik	0	0	0	0	0	0	0	0	0	0	0	0	0	0	0	0
4931422A03Rik	0	0	1.97612	0	0	0	0	0	2.31484	0	0	0.906872	0	0	0	0.976082
4931423N10Rik	0	0	1.97612	0	0	0	0	0	0	0	0	0	0	0	0	0
4931428F04Rik	91.2846	67.8532	68.5375	95.2668	90.1741	77.6596	64.574	57.5649	68.1565	69.5588	56.6388	95.3613	77.478	106.201	60.224	90.6487
4931428L18Rik	0	1.98399	0	0	0	0	0	0	0	0	0.95434	0	0	0	0	2.01181
4931429L15Rik	0	0	0	0	0	0	0	0	0	0	0	0	0	0	0	0
4931429P17Rik	0	0	0	0	0	0	0	0	0	0	0	0	0	0	0	0
4931430N09Rik	0	0	0	0	0	0	0	0	0	0	0	0	0	0	5.81504	0
4931431B13Rik	3.16114	0	0	0	0	0	0	0	0	0	0	0.902975	0	0	0	0
4931431C16Rik	0	0	0	2.08341	0	0	0	0	1.13167	0.973971	0	0	0	0	2.32484	1.00289
4931440F15Rik	0	0	0.989649	3.09597	2.35964	2.16965	1.91442	0	4.58464	0	0.945698	0.909644	1.08762	1.66672	1.15731	2.97881
4931440J10Rik	0	1.97774	1.98236	0	0	0	0	0	0	0.969982	0	0	0	5.8603	0	0
4931440P22Rik	10.0375	17.6177	17.1168	7.04241	6.34212	6.51692	10.0915	11.8935	16.8719	22.7214	16.9534	12.3947	5.41922	20.0454	3.33714	14.5137
4932411N23Rik	0	0	0	0	0	0	0	0	0	0	0	0	0	0	0	0
4932412D23Rik	0	0	0	0	0	0	0	0	0	0	0	0	0	0	0	0
4932413F04Rik	0	0	0	0	1.55737	0	0	0	0	1.93032	0	3.62392	0	1.67716	0	0
4932414J04Rik	0	0	0	0	0	0	0	0	0	0	0	0	0	0	0	0
4932414N04Rik	0	0	0	0	0	0	0	0	0	0	0	0	0	0	0	0
4932415M13Rik	0	0	0	0	0	0	0.968483	0	0	0	0	0	0	0	0	0
4932429P05Rik	0	0	0	0	0	0	0	0	0	0	0	0	0	0	0	0
4932435O22Rik	4.14546	0.97532	3.0029	10.5884	1.53657	0	0	4.66946	8.88473	5.7515	1.93443	1.79681	0	2.49206	1.17864	1.02171
4932438A13Rik	2063.5	2226.96	1528.95	1980.96	2057.94	1965.65	2066.51	2218.12	1910.44	2076.02	2227.15	2370.46	1343.21	2002.99	2020.31	2016.8
4932438H23Rik	15.2416	17.4018	19.6606	13.8548	14.4637	11.1386	10.9108	31.2899	6.92291	8.92015	17.7686	14.7655	12.9585	8.57823	1.20068	11.4272
4932441J04Rik	3.00237	3.76703	1.04616	7.63827	5.92406	3.11838	3.03955	3.57534	8.79034	5.69489	5.89811	1.84124	1.06095	8.17869	1.21646	0
4932702P03Rik	1.05371	0	0	0	0	0	0	0	0	1.96005	0	0	0	1.67049	1.15377	0
4933400A11Rik	0	0	0	0	0	0	0	0	0	0	0	0	0	0	0	0
4933400B14Rik	0	0	0	0	0	0	0	0	0	0	0	0	0	0	0	0
4933400C23Rik	0	0	0	0	0	0	0	0	0	0	0	0	0	0	0	0
4933400F21Rik	0	0	0	0	0	0	0	0	0	0	0	0	0	0	0	0
4933400L20Rik	0	0	0	0	0	0	0	0	0	0	0	0	0	0	0	0
4933401B06Rik	0	0	0	0	0	0	0	0	0	0	0	0	0	0	0	0
4933401D09Rik	0	0	0	0	0	0	0.968483	0	0	0	0	0	0	0	0	0
4933401H06Rik	0	0	0	0	0	0	0	0	0	0	0	0	0	0	0	0
4933402C06Rik	0	0	0	0	0	0	0	0	0	0	0	0	0	0	0	0
4933402D24Rik	0	0	0	0	0	0	0	1.14688	0	0	0.95638	0	0	0	0	0
4933402E13Rik	0	1.95498	0	0	0	0	0.982858	0	0	0.949231	0.981092	0	0	0	0	0
4933402J07Rik	0	0	0	0	0	0	0	0	0	0	0	0	0	0	0	0
4933402J10Rik	0	0	0	0	0	0	0	0	0	0	0	0	0	0	0	0
4933402J15Rik	0	0	0	0	0.778683	0	0	0	0	0	0	0	0	0	0	0
4933402N03Rik	0	0	0	0	0	0	0	0	0	0	0	0	0	0	0	0
4933402N22Rik	0	0	0	0	0	0	0	0	0	0	0	0	0	0	0	0
4933403O08Rik	0	0	0	0	0	0	0	0	0	0	0	0	0	0	0	0
4933404G15Rik	0	0	0	0	0	0	0	0	0	0	0	0	0	0	0	0
4933404K08Rik	0	0	0	0	0	0	0	0	0	0	0	0	0	0	0	0
4933404K13Rik	0	0	0	0	0	3.26441	0.956486	0	0	0	0	0	0	0	0	0
4933404O12Rik	44.5343	34.7453	36.3937	65.3968	28.0974	31.3036	31.7595	57.3769	46.4283	37.1668	29.5929	40.5099	30.509	20.9657	30.1311	44.6465
4933405D12Rik	0	0	0	1.04955	0	0	0.961241	0	0	0	0	0	0	0	3.48902	0
4933405E24Rik	0	0	0	0	0	0	0	0	0	0	0	0	0	0	0	0
4933405L10Rik	1.06217	0	1.96097	0	0.77845	0	0	0	2.27389	0.968119	0	0	0	0	0	0
4933405O20Rik	0	0	0	0	0	0	0	0	0	0	0	0	0	0	0	0
4933406C10Rik	3.1707	3.96326	0.987066	2.07827	3.10967	5.40541	1.92857	3.44636	6.81557	2.91485	5.74941	11.634	5.47053	10.9375	5.79448	8.91376
4933406D12Rik	0	0	0	0	0	0	0	0	0	0	0	0	0	0	0	0
4933406F09Rik	0	0	5.92835	0	0	0	0	0	0	0.960365	0	0	0	0	1.17923	0
4933406G16Rik	0	0	0	0	0	0	0	0	0	0	0	0	0	0	0	0
4933406I18Rik	1.05371	0	0	0	0	0	0	0	0	2.02821	0	0	0	3.09303	1.20437	0
4933406J09Rik	0	0	2.96418	0	0	0	0	0	0	0	0	0	0	0	0	0
4933406J10Rik	0	0	0	0	0	0	0	0	0	0	0	0	0	0	0	0
4933406K04Rik	0	0	0	0	0	0	0	0	0	0	0	0	0	0	0	0
4933406M09Rik	0	0	0	0	0	0	0	0	0	0	0	0	0	0	0	0
4933407E24Rik	0	1.00319	4.93833	0	5.48699	2.16923	3.80488	2.27393	1.14452	0.979411	0	0	10.8915	0	6.89685	4.94713
4933407G14Rik	0	0	0	0	0	0	0	0	0	0	0	0	0	0	0	0
4933407I05Rik	0	0	0	0	0	0	0	0	0	0	0	0	3.2419	0	0	0
4933407K13Rik	66.7446	75.7933	80.1141	40.8902	107.943	88.8033	67.2749	72.6721	59.7947	81.8195	69.0589	79.9147	44.3035	56.6415	81.506	85.6958
4933407L21Rik	0	0	0	0	0	1.07466	0	0	0	0	0	0.905169	0	0	1.16019	0
4933408B17Rik	25.1093	6.37195	11.9693	11.1157	5.98782	7.64553	5.95634	4.90293	14.6117	28.7319	19.7364	24.422	17.131	9.57839	0	4.18838
4933408J17Rik	0	0	0	0	2.33605	0	0	0	0	0	0	0.904953	0	0.832117	0	0
4933408N05Rik	0	0	0	0	0	0	0	0	0	0	0	0	0	0	0	0
4933409F18Rik	0	0	0	0	0	0	0	0	0	0	0	0	0	0	0	0
4933409G03Rik	0	0	0	0	0	0	0	0	0	0	0	0	0	0	0	0
4933409K07Rik	75.1387	46.6052	44.3273	61.3007	72.4966	66.8233	46.331	40.1839	67.8829	54.69	49.6733	55.7638	18.5001	28.4964	25.5373	54.7223
4933411E08Rik	2.10656	0.988908	0	0	0	1.07846	0	0	1.13324	0.967551	1.90833	0	1.08858	0.837472	1.15677	0
4933411G06Rik	0	0	0	0	0	0	0	0	0	0	0	0	0	0	0	0
4933411K16Rik	9.62092	0.996749	7.88272	4.13713	8.60585	4.32021	11.4469	6.85508	2.27363	6.90739	8.51607	4.55241	2.17429	6.6654	6.9461	6.90735
4933412E12Rik	51.9286	28.8407	61.7793	101.103	78.3826	60.481	51.2982	35.605	35.2684	35.4286	55.6202	46.105	50.5275	46.0908	49.1154	63.3644
4933412E24Rik	0	0	0	0	0	0	0	0	0	0	0	0	0	0	0	0
4933412O06Rik	0	0	0	0	0	0	0	0	0	0	0	0	0	0	0	0
4933413J09Rik	1.04935	0	0.996313	0	1.55089	0	0	0	0	0.968338	0	0.898576	0	0.83625	0	1.01152
4933413L06Rik	4.19081	1.96798	1.01319	0	1.53988	0	0	0	0	0	2.85297	0	0	0	0	2.0189
4933415F23Rik	0	0	0	0	1.55737	0	0	0	0	0	0	0	0	0	0	0
4933416C03Rik	0	0	0	0	0	0	0	0	0	0	0	0	0	0	0	0
4933416E03Rik	0	0	0	0	0	0	0	0	0	0	0	0	0	0	0	0
4933416I08Rik	0	0	0	0	0	0	0	0	0	0	0	0	0	0	0	0
4933416M06Rik	0	0	0	0	0	0	0.968483	0	0	0	0	0	0	0	0	0
4933416M07Rik	0	0.989273	0	0	0	1.07762	0	0	0	0	0	0	0	0	0	0
4933416O17Rik	0	0	0	0	0	0	0	0	0	0	0	0	0	0	0	0
4933417A18Rik	0	0	0	0	0	0	0	0	0	0	0	0	0	0	0	0
4933417D19Rik	6.40147	2.99195	10.8541	2.06815	11.7281	19.4852	2.85601	2.28617	2.28013	0	13.2957	7.26541	3.27496	10.0386	8.08932	4.94817
4933417E11Rik	0	0	0	0	0	0	0	0	0	0	0	0	0	0	0	0
4933417G07Rik	0	0	0	0	0	0	0	0	0	0	0	0	0	0	0	0
4933417O13Rik	1.06204	0	2.95825	0	0	0	2.88263	4.59676	0	0	0	1.80996	0	2.51988	0	0.994358
4933421I07Rik	0	0	0	0	0	0	0	0	0	0	0	0	0	0	0	0
4933421O10Rik	163.743	173.608	161.009	159.629	179.838	146.393	198.221	186.311	154.47	170.722	126.473	158.941	199.248	171.316	137.263	126.375
4933422A05Rik	0	0.990401	0	0	0.776698	2.15828	0	0	1.13307	0	0	2.70245	0	0	0	0
4933424G05Rik	2.10432	9.85454	6.9588	3.13375	1.54801	3.22265	0.970064	9.21206	5.65517	1.94368	0	8.98883	0	6.70705	2.3288	1.00317
4933424G06Rik	0	0	0	0	1.55325	1.07849	1.93519	0	2.2598	0	0	0	1.08392	0	2.31991	0
4933424L21Rik	0	0	0	0	0	0	0	0	0	0	0	0	0	0	0	0
4933425B07Rik	0	0	0	0	0	0	0	0	0	0	0	0	0	0	0	0
4933425L06Rik	0	0	0	0	0	0	0	0	0	0	0	0	0	0	0	0
4933427D06Rik	0	0	0	0	0	0	0	1.14688	0	0	0	0	1.08063	0	0	0
4933427D14Rik	232.162	205.832	215.584	240.326	213.693	196.862	250.555	209.537	168.033	172.232	214.584	255.205	224.206	145.053	169.532	200.66
4933427E11Rik	0	3.00193	0	0	0.781037	0	0	6.80128	1.14792	0	0	0	0	0	0	2.96521
4933427E13Rik	0	0	0	0	0	0	0	0	0	0	0	0	0	0	0	0
4933427I22Rik	0	0	0	0	0	0	0	0	0	0	0	0	0	0	0	0
4933428C19Rik	0	0	0	0	0	0	0	0	0	0	0	0	0	0	0	0
4933428G20Rik	0	0	0	1.03612	1.5704	2.16936	0.956697	0	0	0	0	2.7186	1.08637	0	3.45823	0
4933428M09Rik	0	0	0	0	0	0	0	0	0	0	0	0	0	0	0	0
4933429K18Rik	0	0	0	0	0	0	0	0	0	0	0	0	0	0	0	0
4933429O19Rik	0	0	0	0	0	0	0	0	0	0	0	0	0	0	0	0
4933430H16Rik	0	0	0	0	0	0	0	0	0	0	0	0	0	0	0	0
4933430I17Rik	4.23963	1.98565	8.87128	1.03938	1.55948	0	1.92532	5.74936	4.53745	1.95017	0	3.59086	4.37	3.36023	4.63334	7.92432
4933430M04Rik	0	0	0	0	0	0	0	0	0	0	0	0	0	0	0	0
4933430N04Rik	0	0	0	0	0	0	0	0	0	0	0	0	0	0	0	0
4933431E20Rik	434.865	394.504	300.794	289.638	393.838	360.061	324.251	280.495	367.041	350.987	383.737	323.425	353.71	296.129	309.693	351.863
4933431G14Rik	0	2.9633	0.992289	0	0	0	0	0	0	0	0	0	0	0	0	0
4933432G23Rik	0	0	0	0	0	0	0	0	0	0	0	0	0	0	0	0
4933432I03Rik	0	0	0	0	0	0	0	0	0	0	0	0	0	0	0	0
4933432I09Rik	46.2845	23.3608	25.0518	10.4451	11.1277	36.3216	25.1192	12.696	36.585	20.6195	25.523	28.9732	23.9893	24.2242	25.4054	23.7484
4933432K03Rik	0	0	0	0	0	0	0	0	0	0	0	0	0	0	0	0
4933433F19Rik	0	0	0	0	0	0	0	0	0	0	0	0	0	0	0	0
4933433G08Rik	0	0	0	0	0	0	0	0	0	0	0	0	0	0	0	0
4933433G15Rik	0	0	0	0	0	0	0.963787	2.30494	1.14635	5.85165	2.86296	13.4911	0	2.52217	2.31332	2.975
4933433G19Rik	0	0	0	0	0	0	0	0	4.52626	0	0	0.902014	0	0	0	0
4933433H22Rik	0	0	0	4.16681	0	0	0	0	1.12882	0	0	0	3.24631	0	0	0
4933434E20Rik	1297.99	1491.45	1188.41	1300.23	1090.87	1262.12	1108.89	1137.34	1166.06	1053.91	1120.43	1106.68	1219.02	1118.15	1099.16	980.874
4933436E23Rik	0	0	0	0	0	0	0	0	0	0	0	0	0	0	0	0
4933436H12Rik	0	0	0	0	0	0	0	0	0	0	0	0	0	0	0	0
4933436I01Rik	0	0	0	0	0	0	0	0	0	0	0	0	0	0	0	0
4933438B17Rik	0	0	0	0	0	0	0	0	0	0	0	0	0	0	0	0
4933438K21Rik	0	0	0	0	0	0	0	0	0	0	0	1.80595	0	0	0	0
4933439C10Rik	116.017	88.6198	83.1156	71.7248	139.913	125.732	75.6158	114.412	74.9608	115.514	97.549	105.139	96.1063	87.6314	116.862	112.332
4933439K11Rik	1.06641	5.97448	12.8382	8.27853	0.780687	1.08372	7.61069	1.14491	2.27596	3.93246	1.89864	0.907019	2.18328	0	3.46468	1.97473
4933440J02Rik	0	0	0	0	0	0	0	0	0	0	0	0	0	0	0	0
4933440M02Rik	1.05371	0	0	0	0	0	0	0	0	0	0	0	0	0	0	0
5031410I06Rik	0	0	0.988059	0	0	0	0	0	0	0	0	0	0	0	2.32602	0
5031425E22Rik	305.393	328.032	302.508	252.227	332.708	246.221	288.252	258.867	265.883	437.271	314.6	333.572	266.026	251.811	292.085	259.131
5031425F14Rik	9.65754	10.0785	6.91246	21.4984	6.29271	11.9684	12.2836	15.835	6.90545	2.9583	9.40812	14.5464	8.71959	8.32525	9.19422	8.89024
5031426D15Rik	1.02417	9.65805	0	3.21659	3.80506	2.11424	2.01538	1.17717	1.11294	6.71525	0	1.81224	2.15125	7.50933	2.39953	0
5031434C07Rik	0	0	0	0	0	1.06915	0	1.15279	0	1.93631	0	0	0	0.83468	0	2.01735
5031434O11Rik	14.8794	18.8204	15.8696	4.15697	13.2074	10.7959	6.69811	6.88933	3.40725	11.7556	3.79835	6.35122	15.2411	6.65967	10.432	3.97231
5031439G07Rik	1319.31	1346.89	1326.58	1693.73	1220.86	1372.56	1330.6	1491.39	1278.07	1101.66	1099.92	1260.26	1244.3	1147.97	1166.35	1118.88
5033403F01Rik	2.05467	0.966076	1.00642	7.41366	0	1.05688	6.89985	3.49588	0	2.86083	4.80244	4.49938	0	1.64222	3.52545	3.08806
5033403H07Rik	0	0	0	0	0	0	0	0	0	0	0	0	0	0	0	0
5033404E19Rik	0	0	0	0	0	0	0	0	0	0	0	0	0	0	0	0
5033406O09Rik	19.1397	16.9621	15.7876	43.4349	42.964	34.6523	31.5352	37.7075	23.9744	28.3483	31.3821	27.9367	30.5777	17.5991	41.5262	21.7894
5033417F24Rik	29.1398	8.76733	12.5712	4.19846	14.5182	22.1571	22.6443	25.8609	24.9869	24.4021	8.58793	13.485	4.36368	22.6441	22.009	22.8198
5033428I22Rik	24.9979	19.5756	21.8991	13.6756	40.0534	10.6968	32.2532	16.2852	11.1576	17.3767	10.6019	17.2473	23.6472	19.0787	36.4324	27.3425
5330411J11Rik	0	0	0	0	0	0	0	0	0	0	0	0	0	0.83394	0	0
5330413P13Rik	0	0	0.984796	0	0	0	0.971692	0	0	0	0	0	2.16008	1.6688	0	0
5330416C01Rik	1.04867	1.97143	6.93205	0	0	0	8.76499	6.90418	2.26487	0	0	0	0	0	0	4.00768
5330417C22Rik	4.20728	0	0	3.13073	0	0	0	0	2.25702	3.8867	1.91714	0.899276	0	2.51045	1.16552	0
5330434G04Rik	0	0	0	0	0	0	0	0	0	0	0	0	0	0	0	0
5330439B14Rik	0	0	0	0	0	0	0	0	0	0	0	0	0	0	0	0
5430401F13Rik	0	0	0	0	0	0	0	0	0	0	0	0	0	0	0	0
5430402E10Rik	0	0	0	0	0	0	0	0	0	0	0	0	0	0	0	0
5430402O13Rik	9.97962	1.94914	7.17639	11.7211	1.57848	3.29359	4.62845	9.38763	9.1967	4.90033	17.3645	1.83143	0	2.33588	0	14.3745
5430403N17Rik	0	0	0	0	0	0	0	0	0	0	0	0	0	0	1.16301	0
5430405H02Rik	41.4271	55.3606	49.8102	27.6677	47.485	25.0869	52.1024	52.1591	62.1301	61.7367	66.6165	44.9474	47.6994	22.1211	30.5849	41.4413
5430416N02Rik	13.6642	8.92869	18.1667	12.4608	31.6832	32.4608	12.4413	21.7268	24.0134	23.1765	14.2088	15.363	15.1993	7.45728	16.2308	24.3446
5430419D17Rik	136.609	110.168	110.527	75.7883	81.8255	71.1594	89.6427	114.663	91.7858	103.55	116.357	114.363	88.11	60.2718	97.4399	111.529
5430421F17Rik	0	0	0	0	0	0	0	0	0	0	0	0	0	0	1.16301	0
5430425K12Rik	0	1.95326	0.995551	0	0	0	3.90528	0	0	0	0	0	0	1.66573	1.16332	1.00479
5430427M07Rik	0	0	0	0	2.33605	0	0	0	0	0	0	0	0	2.50182	0	0
5430427O19Rik	12.0702	24.7062	13.2562	85.3869	24.0177	19.8455	19.3619	16.6355	2.17303	11.2781	10.7975	7.22619	17.9312	22.9714	12.0389	9.54168
5430428K19Rik	0	0	0	0	0	0	3.87393	0	0	0	0	0	0	0	0	0
5430431A17Rik	219.875	191.722	138.447	100.17	213.187	139.14	161.978	123.403	188.762	152.878	163.183	201.759	133.633	142.309	223.111	191.171
5430434I15Rik	0	0	0	0	0	0	0	0	0	0	0	0	0	0	0	0
5430437J10Rik	0	0	0	8.46834	1.53608	1.07221	0	0	5.59095	0	0	0	0	0	2.35133	0
5430440P10Rik	0	0	0	0	0.778683	0	0	0	0	0	0	0	0	0	0	0
5530400C23Rik	0	0	0	0	0	0	0	0	0	0	0	0	0	0	0	0
5530401A14Rik	0	0	0	0	0	0	0	0	0	0	0	0	0	0	0	0
5530601H04Rik	92.4525	65.6812	66.6404	75.5371	102.474	85.8506	101.056	56.0005	70.3155	97.7438	83.9174	75.254	72.6172	83.8273	109.927	77.8242
5730403I07Rik	0	0	0	0	0	1.07466	0	0	0	0	0	0	0	0	0	5.01881
5730405O15Rik	9.38674	12.7459	0.997551	28.3188	4.61404	11.7901	6.85447	9.26435	3.37749	3.84601	10.5981	14.3451	7.5795	5.84052	17.5747	10.1034
5730408K05Rik	1.07909	2.01472	3.99524	2.04842	14.8231	3.302	4.61904	3.40084	4.67416	6.86937	4.68573	3.65087	2.21347	2.50104	6.83074	4.85294
5730409E04Rik	663.04	559.641	734.822	625.2	538.632	649.458	531.863	711.399	491.453	528.177	560.327	589.491	624.318	562.332	425.232	531.932
5730412P04Rik	0	0	0	0	0	0	0	0	0	0	0	0	0	0	0	0
5730416F02Rik	0	0	0	0	0	0	0	0	0	0	0	0	0	0	0	0
5730420D15Rik	2.12322	6.99916	2.98054	1.03531	1.56074	0	1.91076	5.71563	6.9027	1.95135	3.81521	4.50366	7.48511	3.36482	2.31056	4.98946
5730422E09Rik	2.114	0	1.97359	0	3.10902	0	0	0	0	0	4.77159	3.58628	1.0907	0	0	0
5730435O14Rik	0	0	0	0	0	0	0	0	0	0	0	0	0	0	0	0
5730455P16Rik	980.139	836.065	850.155	750.007	755.473	859.196	777.808	749.694	821.364	862.158	804.906	904.727	668.656	771.013	686.378	788.606
5730460C07Rik	0	0	0	0	0	0	0	0	3.39108	0	0	0	0	0	0	0
5730480H06Rik	30.2433	20.9141	8.21063	10.8126	30.7241	39.6784	12.1723	31.9864	30.5439	66.0323	28.2475	28.0079	14.7606	22.0678	27.5911	16.0234
5730488B01Rik	0	0	0	0	0	0	0	0	0	0	0	0	0	0	0	0
5730507C01Rik	6.03915	18.0325	9.3416	8.68211	29.1295	16.6201	16.2259	21.2598	12.022	2.76688	10.721	7.3112	21.0118	12.9897	20.4415	4.34399
5730522E02Rik	0	0	0	0	0	1.07466	0	0	0	2.89369	0	0.906465	1.08673	0	0	0
5830408C22Rik	0	0.994669	1.97081	0	0	0	0	0	2.32876	0	0	1.83582	0	1.66584	0	0.959754
5830411N06Rik	0	0	0	1.0538	2.30923	0	0	0	0	0	0	0	0	0.83394	0	0
5830416I19Rik	1.043	1.95835	2.98465	3.15324	0.771022	11.744	2.94419	4.63632	0	4.82706	6.73397	0	2.15531	1.66516	5.85673	0
5830417I10Rik	1878.28	1892.24	1513.96	1956.31	1154.76	1263.2	1420.53	1814.01	1830.84	1520.21	1661.77	1737.91	1328.51	1582.18	1280.59	1297.92
5830418P13Rik	0	0.997171	0	5.19901	0	0	2.89008	3.44728	0	0.978281	0	1.80248	6.53687	1.67501	4.63307	3.97094
5830428M24Rik	2.10132	0	0.992051	0	0	5.37559	0.966972	0	0	0.973228	0	1.80562	0	0	0	3.01348
5830432E09Rik	13.7619	11.9139	4.96441	17.6597	0.777613	8.61772	8.64948	2.29178	5.67984	4.88098	5.70547	13.5726	4.34128	4.16538	15.071	12.9983
5830444B04Rik	22.4175	10.9943	32.2754	50.2394	13.4691	5.20279	25.2842	26.4083	8.22149	4.60394	19.6736	25.1228	64.8133	25.6089	39.5673	14.1665
5830454E08Rik	12.8614	25.1547	21.7575	5.12353	7.85238	19.6956	8.45376	11.3376	3.46293	41.1723	12.2567	14.4762	15.3895	9.20764	24.0514	10.8137
5830473C10Rik	0	0	0	0	0	0	0	0	0	0	0	0	0	0	0	0
5930403L14Rik	34.031	20.9651	11.8919	24.814	14.0596	12.9285	26.8927	22.7472	19.3844	25.3925	22.8459	17.2643	13.0016	18.2702	23.1285	30.93
5930412G12Rik	0	1.98454	1.97572	1.04006	3.11976	1.07789	6.74742	2.29746	2.26346	0	0.954384	3.61556	2.1745	0	0	1.99503
5930430L01Rik	232.56	93.8561	214.714	72.8398	190.029	138.915	88.7023	137.798	150.299	161.32	162.715	145.219	133.511	85.1657	99.9708	162.35
5930438M14Rik	0	0	0	0	0	0	0	0	0	0	0	0	0	0	0	0
6030407O03Rik	4.21757	0.991273	0	0	10.8819	6.47039	15.446	2.2975	1.13239	5.82402	3.82291	0	17.3914	10.0383	16.2268	16.0046
6030408B16Rik	46.4927	30.8528	15.8779	44.5321	30.3567	31.3337	95.3662	87.9398	44.5469	22.3056	39.0844	17.0152	24.0155	53.6708	17.3496	22.9699
6030440G07Rik	0	0	0	0	0	0	0	0	0	0	0	0	0	0	0	0
6030443J06Rik	15.4903	23.3293	12.0438	8.46738	14.5347	11.6712	24.7936	18.6399	16.6691	18.2221	26.0836	17.9905	13.9284	38.1412	17.7127	20.5854
6030458C11Rik	538.834	457.912	504.107	567.075	531.008	551.304	541.749	576.895	476.272	456.565	467.076	566.135	462.898	601.992	435.558	463.043
6030466F02Rik	9.60966	0	0	4.1455	7.04783	0	1.91053	0	5.68242	3.93212	2.84799	5.43788	4.36035	4.17986	1.15515	1.97657
6030468B19Rik	0	0	0	1.02869	1.57707	0	0	0	0	0	0	0	0	0	0	0
6030469F06Rik	0	0	0	0	0	0	0	0	0	0	0	0	3.2419	0	0	0
6030471H07Rik	0	0	0	0	0	0	0	0	0	0	0	0	0	0	0	0
6030498E09Rik	0	0	0	0	0	0	0	0	0	2.92127	0	0	0	0	0	0
6230400D17Rik	13.4773	2.93269	6.07027	4.20438	8.43377	5.33163	17.6578	8.09868	4.48011	4.79226	0.957005	5.43963	2.14408	4.11764	3.53549	5.15966
6330403K07Rik	75.4078	68.0434	49.4953	38.1429	51.5796	46.6529	29.6232	14.7941	59.6483	50.6919	49.3073	76.4394	56.799	41.0311	28.8393	44.7277
6330407A03Rik	0	1.98399	0	0	0	0	0	0	0	0	0	0	0	0	0	0
6330409D20Rik	0	0	0	7.30575	0	0	3.8666	0	0	0	0	0	0	0.83394	0	0
6330410L21Rik	68.2925	65.1645	70.3386	47.6226	10.7142	23.3719	23.7007	20.9486	48.9846	55.7333	48.195	68.3662	20.4021	32.3548	27.0827	23.6382
6330415B21Rik	0	0	0	0	0	0	0	0	0	0	0	0	0	0	0	0
6330415G19Rik	0.952149	5.34651	1.76612	1.84019	10.0926	5.78118	1.70105	3.50772	12.9356	6.64515	3.04803	2.53408	7.89071	15.3174	0	3.9602
6330418K02Rik	22.3095	20.8445	11.9319	20.7693	19.425	23.8121	26.6722	27.5139	21.6399	13.7017	18.0287	12.6752	12.0047	15.0131	32.3392	31.786
6330549D23Rik	17.7947	16.6971	7.9351	8.38176	6.95588	6.42714	5.86668	5.78112	3.37015	11.6015	6.73603	4.4812	4.33656	5.01968	2.33648	6.04528
6430411K18Rik	0	0	0	0	0	0	0	0	0	0	0	0	0	0	0	1.00376
6430503K07Rik	0	0	0	0	0	0	0	0	0	0	0	0	0	0	0	0
6430531B16Rik	3.19995	0	0	1.02907	0	0	0	0	0	0	0	0	0	0	0	0
6430548M08Rik	1647.67	1302.29	1429.06	1300.23	1465.54	1335.89	1850.7	1549.21	1460.91	1567.06	1591.3	1473.88	1471.98	1576.81	1187.07	1522.33
6430550D23Rik	5.46951	4.26818	8.4349	3.32131	4.08884	8.5758	2.05941	4.87848	11.6522	13.3671	8.05743	2.82611	15.9928	3.51552	6.11971	5.28647
6430553K19Rik	0	0	0	0	0	0	0	0	0	0	0	0.902975	0	0	0	0
6430562O15Rik	44.6129	26.8252	47.3307	31.1055	30.4122	25.9129	32.6677	34.3705	32.9358	40.1381	29.5172	17.1447	23.9674	32.6365	73.0333	36.6482
6430571L13Rik	140.959	126.541	147.301	115.95	85.0932	72.3109	153.719	117.732	115.946	73.2743	84.6535	90.2969	119.507	147.054	114.659	125.649
6430584L05Rik	15.7524	27.6101	25.7628	21.9325	24.7861	24.71	15.5658	14.9842	23.6819	8.73217	26.8446	18.8437	14.1021	21.7493	5.83136	16.0614
6430628N08Rik	0	0	0	0	0	0	0	0	0	0	0	0	0	0	0	0
6430706D22Rik	1115.12	963.01	942.975	1099.03	1118.84	891.505	964.961	969.688	707.704	1081.88	896.663	987.108	919.06	833.561	680.888	980.254
6430710C18Rik	17.538	12.8326	6.46779	8.777	1.43023	8.64637	12.1722	8.45344	12.3256	10.4126	10.6034	7.63834	11.5056	6.15204	5.11077	9.31933
6530402F18Rik	303.012	321.81	398.419	486.381	303.049	361.94	395.914	472.34	313.616	285.574	306.916	319.11	304.582	416.236	319.596	315.076
6530403H02Rik	0	0	1.98013	0	0	0	0	1.14456	0	0	0	0	1.08063	0	0	0
6530411M01Rik	0	0	0	0	0.778683	0	0	0	0	0	0	0	0	0	0	0
6720468P15Rik	4.22268	1.97632	4.9555	3.11795	0	4.30514	0	1.14657	0	0.974627	4.7899	3.59884	0	5.04115	0	0.997348
6720483E21Rik	5.27981	0	0.988826	0	0	2.15905	2.88395	0	6.82056	0	0.954585	0.897263	3.2729	0.8375	0	1.98516
6720489N17Rik	55.171	77.1023	35.7761	66.5655	86.7187	62.5158	42.8409	44.7919	51.4232	106.234	74.9149	86.0597	33.3375	49.6726	54.1436	76.3868
6820408C15Rik	203.243	194.518	229.431	128.922	129.943	153.737	174.337	99.6083	186.999	179.848	215.277	174.405	187.898	155.637	118.007	173.426
6820426E19Rik	0	0	0	0	0	0	0	0	0	0	0	0	0	0	0	0
6820431F20Rik	2002.7	1946.14	1496.18	1966.08	2388.35	1960.63	1704.52	1808.66	1819.99	2193.1	1811.97	1958.23	1678.68	1770.29	1964.21	1783.3
7420426K07Rik	0	0	0	0	0	0	0	0	0	0	0	0	0	0	0	0
7420700N18Rik	0	0	0	0	0.764379	0	0.986607	0	0	0	0	0	0	0	0	0
7420701I03Rik	0	0	0	0	0	0	0	0	0	0	0	0	0	0	0	0
7530416G11Rik	0	0	0	0	0	0	0	0	0	0	0	0	0	0	0	0
7630403G23Rik	0	0	0	0	0	0	0	0	0	0	0	0	0	0	0	0
8030411F24Rik	0	0	0	0	0	0	0	0	0	0	0	0	0	0	0	0
8030423F21Rik	2.10456	0.986419	3.96783	1.04489	0	0	0	0	1.13229	0.974681	0	4.50293	0	0	0	0
8030423J24Rik	0	0	0	0	0	0	0	0	0	0	0	0	0	0	0	0
8030442B05Rik	0	0	0	0	0	3.19823	0	1.15611	0	0	0	0	1.07722	0	0	4.02776
8030443G20Rik	0	0	0	0	0	0	0	0	0	0	0	0	0	0	0	0
8030451O07Rik	0	0	0	0	0	0	0	0	0	0	0	0	0	0	0	0
8030455M16Rik	0	0	0.986683	0	0.779769	0	0	0	0	0	0	0	0	0	0	1.00376
8030462N17Rik	518.51	627.943	465.917	596.082	489.769	573.448	519.474	651.312	476.246	505.136	443.485	480.343	545.983	556.79	497.874	479.202
8030474K03Rik	0	0	8.86304	0	16.4068	0	0	0	2.27117	1.9502	0	1.79724	0	1.66595	0	0
8430422H06Rik	0	0	0	0	0	0	0	0	0	0	0	0	0	0	0	0
8430423G03Rik	0	0	0.992606	2.07347	0	0	0	1.1471	1.14156	0	0	0	0	2.50317	2.30195	0
8430426J06Rik	0	1.95099	0	2.10536	0.763554	4.27969	0.984338	2.3263	0	6.54063	1.5728	0	1.23025	0	1.34822	1.65249
8430429K09Rik	69.1432	76.3674	37.5907	40.6813	57.3527	61.2669	47.3888	31.1097	19.2859	29.5297	51.117	43.2928	43.2555	32.5078	25.3467	44.1296
8430430B14Rik	0	0	0	0	0	0	0	0	0	0	0	0	0	0	0	0
8430431K14Rik	1.0062	0	0	0	0	0	1.01421	0	0	0	3.80159	0	0	0	1.17033	0
8430436N08Rik	0	0	0	0	0	0	0	0	0	0	0	0	0	0	0	0
8430437L04Rik	0	0.984366	1.98915	0	0	0	1.93919	0	1.12853	1.94156	0	0	0	0	1.16397	3.02291
9030025P20Rik	97.5606	56.063	25.8295	33.4959	56.4416	86.8464	25.328	43.8566	66.4581	54.2738	81.5005	97.856	67.2266	54.3012	18.6639	30.2129
9030204H09Rik	0	0	0	0	0	0	0	0	0	0	0	0	0	0	0	0
9030404E10Rik	0	0	0	0	0	0	0	0	0	0	0	1.80595	0	0	0	0
9030612E09Rik	7.37634	6.95336	1.98804	2.07576	7.77669	6.4664	1.93159	10.296	5.681	0.969216	0	7.20068	3.25369	2.50119	6.95855	3.01776
9030616G12Rik	0	0	0	0	0	0	0	0	0	0	0	0	0	0	0	0
9030619P08Rik	1.05491	0.987236	0	0	0	3.23584	0	0	0	0	0	0	0	4.1697	0	0
9030624G23Rik	30.6506	14.8716	47.6074	41.613	47.4144	22.5897	39.5731	27.5051	33.9957	32.0991	26.808	31.6881	19.5128	22.4765	12.7624	37.9854
9030625G05Rik	0	0	0	0	0	0	0	0	0	0	0	0	0	0	0	0
9130008F23Rik	36.5643	48.2058	27.055	48.162	70.1419	49.262	47.8143	40.2989	27.1228	36.6049	39.2931	39.4178	31.4206	37.5392	50.1197	33.5145
9130015A21Rik	2.10742	0	0	0	0	0	0	0	0	0	0	0	0	0	0	0
9130015G15Rik	8.30278	0	6.97638	2.10128	18.407	4.25604	4.91071	3.47216	12.3027	2.8868	1.92986	5.38172	2.15969	10.8423	4.6927	17.2733
9130015L21Rik	0	0	0	0	0	0	0	0	0	0	0	0	0	0	0	0
9130019O22Rik	129.094	76.3794	80.9611	79.9748	100.546	111.974	87.8615	76.8248	81.4281	89.9173	83.8591	58.6543	131.308	93.5689	113.907	95.8465
9130019P16Rik	10.5254	7.91409	6.95698	3.12612	6.20711	7.52189	4.84724	5.73669	2.26207	3.88175	9.57556	0.901979	10.8295	0.833098	10.4676	14.0739
9130023H24Rik	149.985	118.858	118.692	149.74	103.402	121.633	120.04	98.6553	100.852	118.803	157.664	133.787	114.263	124.839	119.68	103.687
9130024F11Rik	0	2.0915	0	0	0	0	1.8374	0	2.28368	1.93902	0	0	4.29783	0	0	0
9130204L05Rik	0	0	0	0	0	0	0	0	0	0	0	0	0	0	0	0
9130209A04Rik	0	0	0	0	0	0	0	0	0	0	0	0	0	0	0	0
9130221F21Rik	0	0	0	0	0	0	0	0	0	0	0	0	0	0	0	0
9130221H12Rik	230.709	143.709	222.014	186.985	213.318	204.796	170.209	191.853	168.903	190.644	149.195	176.618	141.891	145.738	161.723	130.828
9130227L01Rik	0	0	0	0	0	0	0	0	0	0	0	0	0	0	0	0
9130230L23Rik	4.24138	0.991807	1.97236	0	0	1.0801	6.71636	3.44101	1.13087	0.975391	4.75457	2.69676	1.08763	0.835315	0	0
9130401M01Rik	187.486	280.55	251.441	253.791	345.293	309.169	239.053	240.641	247.994	188.122	206.551	175.371	290.282	276.695	260.308	277.495
9130409I23Rik	0	0	0	0	0	0	0	0	0	0	0	0	0	0	0	0
9230009I02Rik	0	0	0	0	0	0	0	0	0	0	0	0	0	0	0	0
9230019H11Rik	0	0	0	0	0	0	0	0	0	0	0	0	0	0	0	0
9230020A06Rik	0	0	0	0	0	0	0	0	0	0	0	0	0	0	0	0
9230102K24Rik	2.10742	0	0	0	0	0	0	0	0	0	0	0	0	0	2.32602	0
9230102O04Rik	0	0	0	0	0	0	0	0	0	0	0	0	1.08063	0	0	0
9230104L09Rik	0	3.96956	5.97685	1.03934	12.4017	10.8661	15.2996	0	4.57824	4.84973	4.77442	7.17413	28.5788	7.55764	2.30875	11.8469
9230105E05Rik	0	0	0	0	0	0	0	0	0	0	0	0	0	0	0	0
9230110F15Rik	0	0	0	0	0	0	0	0	0	0	0	0	0	0	0	0
9230112D13Rik	0	0	0	0	0	2.14931	0	0	0	0	0	0	0	0	0	0
9230112J17Rik	14.4793	14.4442	6.89523	12.5216	9.19017	11.6746	21.4093	9.22159	14.0913	2.81048	5.61729	8.37059	18.8633	17.7974	8.48216	6.23855
9230114K14Rik	98.7857	124.081	65.3625	81.7434	75.5441	65.8011	85.3166	108.704	96.5026	88.9174	98.801	89.0998	51.4027	108.573	79.1853	88.6761
9230116L04Rik	2.12362	0	3.99842	2.07328	1.55864	0	1.91769	4.56368	0	2.92908	1.89929	0	1.08611	3.32312	0	3.02076
9230116N13Rik	5.22816	8.84181	3.00119	5.2426	16.1766	10.6871	5.87277	6.91045	6.7626	5.78368	11.5362	17.1346	7.55333	12.4441	3.50843	7.09868
9230117E06Rik	0	0	0	0	0	0	0	0	0	0	0	0	0	0	0	0
9330020H09Rik	28.4975	35.7141	22.7719	34.2513	26.4661	18.3162	30.9637	24.0495	17.0082	22.3687	37.2051	13.4762	30.428	25.9298	32.5429	21.0316
9330102E08Rik	107.938	70.4025	100.561	90.349	66.9729	81.9427	112.072	175.557	82.6746	71.2649	89.7984	87.1945	72.9305	107.292	85.9761	85.4478
9330104G04Rik	16.9886	13.8966	13.8019	14.5295	20.2814	3.2351	11.5374	9.1732	15.8481	14.71	9.52201	10.8432	16.3132	15.0505	16.2389	23.8223
9330111N05Rik	0	0	0.991153	4.16437	0	1.07193	0	0	0	0.971634	0.958588	0.898231	0	1.67661	0	3.01105
9330117O12Rik	2.09346	0.985204	4.03612	0	1.54575	0	0	0	0	0	0	0	2.16092	0.834073	0	0
9330133O14Rik	101.373	110.003	83.2217	60.3391	91.7269	83.9677	55.0338	87.2099	117.881	105.208	133.576	103.507	97.7647	83.5963	60.345	77.0583
9330136K24Rik	25.7521	17.8171	15.4294	13.1303	22.2795	16.5132	20.7843	21.6171	8.56504	12.0874	6.93097	16.2746	8.33839	17.0977	4.87033	9.77396
9330151L19Rik	157.844	166.084	129.601	99.6679	160.411	156.731	133.6	169.579	109.677	139.847	131.42	114.941	146.757	117.745	91.3136	117.182
9330158H04Rik	413.893	404.039	454.156	352.561	282.662	341.239	483.168	363.225	340.732	366.852	433.098	329.516	342.008	387.862	419.084	359.449
9330159F19Rik	47.2476	13.3221	45.6422	7.554	33.8475	32.4176	26.5584	32.0953	28.2202	27.2232	31.5169	40.6058	16.8766	14.802	12.0567	31.6797
9330159M07Rik	91.7445	85.9106	65.3959	58.2274	78.9461	91.7014	98.9495	90.3394	77.4187	66.3905	99.302	86.5554	78.8566	64.1512	70.2007	100.21
9330162012Rik	23.2234	23.7308	35.8038	11.4695	10.0868	22.5751	22.2122	24.0853	19.2683	21.3943	7.65259	17.1314	34.766	21.6863	16.2272	18.0265
9330162B11Rik	0	0	0	0	0	0	0	0	0	0	0.964634	0.895249	0	0	0	0
9330175E14Rik	9.5119	8.95731	8.9141	49.7263	10.1178	25.9262	13.4814	8.0109	11.3967	9.71934	6.674	8.09332	4.35185	3.34589	5.79467	4.99181
9330175M20Rik	3.10284	0.972259	1.01952	0	1.53098	5.3174	2.00578	0	10.0255	0.959777	3.88735	8.12412	4.30245	8.31297	2.37589	0
9330178D15Rik	0	0	0	0	0	0	0	0	0	0	0	0	0	0	0	0
9330179D12Rik	19.68	8.99114	14.1075	5.94258	37.9234	23.0757	17.1549	27.2608	18.5031	36.2583	9.24975	16.4978	15.5562	24.0675	32.2069	28.8
9330182L06Rik	30.4862	16.2447	44.7291	9.21606	78.0405	84.5605	55.2919	52.7747	24.8347	45.0026	31.6401	32.7648	70.9269	38.528	54.5813	114.618
9330182O14Rik	0	0	0	0	0	0	0	0	0	0	0	0	0	0	0	0
9330188P03Rik	66.2469	78.8308	51.5991	37.6117	75.0623	55.9692	126.871	42.6997	54.2229	56.2256	70.0031	73.6769	83.7731	86.1655	102.386	64.0548
9330198I05Rik	5.20922	13.7052	4.98244	4.20658	6.15929	2.13928	9.79749	3.47877	4.48175	5.78272	11.5613	8.07375	15.1404	5.00776	5.85438	6.08293
9330199G10Rik	0	0	0	0	0	0	0	0	0	0	0	0	0	0	0	1.00376
9430007A20Rik	0	0	0	0	0	0	0	0	0	0	0	0	0	0	0	0
9430014N10Rik	0	0	0	0	0	0	0	0	0	0	0	0	0	0	0	0
9430015G10Rik	109.591	107.638	91.4512	93.5659	128.906	106.286	117.143	139.899	99.1002	110.663	105.554	106.768	108.465	84.9003	57.2227	98.7125
9430018G01Rik	0	0	0	0	0	0	0	0	0	0	0	0	0	0	0	0
9430019J16Rik	0	0	0	0	0	0	0	0	0	0	0	0	0	0	0	0
9430021M05Rik	0	0	0	0	0.778683	0	0	0	0	0	0	0	0	0	0	0
9430037G07Rik	93.4531	92.8448	101.91	61.6461	92.077	94.1528	82.8989	84.07	91.0198	76.1878	86.3958	72.4782	77.2395	101.331	111.192	83.6969
9430038I01Rik	62.7448	63.0692	61.7373	65.8469	53.3653	61.068	68.2431	56.5551	33.7644	44.3957	37.4578	45.1061	59.2961	44.0626	45.5573	51.7553
9430041J12Rik	0	0.991997	0	0	0	0	0	0	0	0	0	0	0	0	0	0
9430060I03Rik	3.20504	1.00214	3.9445	5.13653	2.34751	3.25031	1.89648	0	5.74286	4.90782	0	6.34814	0	1.66721	4.60097	0.986999
9430065F17Rik	9.97605	3.76601	5.69551	10.0271	4.88631	5.16117	3.85897	15.6459	4.77553	1.95731	7.51006	5.60463	2.30634	10.1266	6.51192	3.7903
9430069I07Rik	0	0	0	0	0	0	0	0	0	0	0	0	0	0	0	0
9430078K24Rik	1.09976	6.43887	0	4.25798	5.12903	4.44762	4.90223	2.35323	6.79323	0.996997	5.67196	0.906518	5.42497	2.49467	0	3.94077
9430083A17Rik	21.9783	8.8618	22.975	8.37408	16.988	17.1377	18.5095	5.75901	16.9288	11.6025	9.57301	8.07758	12.9887	16.676	25.632	15.2157
9430091E24Rik	23.9902	31.3521	26.8743	30.4506	31.5979	25.6813	26.4591	25.488	32.5257	35.6265	25.0948	34.9659	26.0065	28.4359	29.2625	33.2885
9530002B09Rik	0	0	0	0	0	0	0	0	0	0	0	0	0	0	0	0
9530003J23Rik	0	0	0	0	0	0	0	0	0	0	0	0	0	0	0	0
9530014B07Rik	0	0	0	0	0	0	0	0	0	0	0	0	0	0	0	0
9530020I12Rik	0	1.77072	2.90567	5.44869	6.73966	3.85301	0.793194	0.94666	2.70208	0	0	1.01102	0	0.934738	0	0
9530026F06Rik	0	0	0	0	0	0	0	0	0	0	0	0	0	0	0	0
9530026P05Rik	34.2595	31.3785	29.696	24.8604	41.2411	28.2633	51.4632	14.2866	13.0312	41.4594	32.2591	29.2439	33.6519	16.2898	25.2713	39.2688
9530027J09Rik	1.0554	0	0	0	3.88222	1.07949	2.89613	0	1.135	0.972196	0	0	0	5.04368	1.16055	1.99083
9530036O11Rik	0	0	0	0	0	0	0	0	0	0	0	0	0	0	0	0
9530051G07Rik	12.175	2.87519	5.06092	13.9405	3.77982	1.05126	5.05162	4.72019	14.2414	6.62379	7.81563	2.70483	5.29901	1.64748	4.78704	3.14476
9530052C20Rik	13.2527	1.92935	9.11715	3.22166	2.28069	6.35532	8.09692	0	0	5.64748	2.92467	2.69026	3.17503	0.822888	2.38102	6.2216
9530052E02Rik	0	0	0	0	0.778683	0	0	0	0	0	0	0.902975	0	0	0	0
9530053A07Rik	9.57359	14.9734	15.7675	19.6389	9.39064	3.23982	8.62772	17.1182	1.13795	10.7873	17.0903	11.7448	10.8755	19.2348	10.4074	1.98657
9530059O14Rik	0	0	0	0	0	0	0	0	0	0	0	0	0	0	0	0
9530062K07Rik	6.29546	0	2.00096	5.2241	5.38441	5.37876	0	0	7.94213	7.74045	1.90821	0	2.17765	1.66763	8.11982	4.01603
9530068E07Rik	3386.87	3394.02	3726.15	3729	3936.43	3609.76	3876.15	3957.78	2983.76	2985.19	3046.56	3040.35	3545.48	3149.17	3543.2	3359.45
9530077C05Rik	50.2933	39.4214	30.3695	21.9966	37.3944	37.2334	39.6376	47.3075	43.4142	54.4983	42.927	45.2122	26.0734	31.0756	21.6605	35.374
9530080O11Rik	0	0	6.44594	12.4891	1.54478	1.07949	3.15694	4.93003	1.15036	9.9361	0	2.89389	2.94574	0.868346	1.10806	0
9530082P21Rik	139.286	168.26	235.508	275.429	182.838	200.776	174.637	108.679	140.724	138.371	160.667	140.137	110.911	131.258	118.156	131.936
9530091C08Rik	1.04544	8.83992	0.998511	0	3.86567	5.35631	3.94268	0	8.96345	2.89334	0.963875	5.36984	0	5.01589	3.51236	1.01427
9630001P10Rik	0	0	0	0	2.33605	0	0	0	0	0	0	0	0	0	0	0
9630013A20Rik	0	0	0	0	0	0	0	0	0	0	0	0	0	0	0	0
9630013K17Rik	0	0	0	0	0	1.07466	0	0	0	0	0	0	0	0	0	0
9630028B13Rik	0	0	0	0	0	0	0	0	0	0	0	0	0	0	0	0
9630028H03Rik	0	0	0	0	0	0	0.968483	0	0	0	0	0	1.08063	0	0	0
9630028I04Rik	391.476	254.01	300.112	200.459	123.064	145.572	132.116	116.991	193.917	344.125	318.865	355.015	176.411	127.372	113.597	153.486
9830107B12Rik	0	0	0	2.08341	0	0	0	0	0	0	0	0	7.56443	0	0	0
9830132P13Rik	0	0	0	0	0	0	0	0	0	0	0	0	0	0	0	0
9830166K06Rik	0	0	0	0	0.778683	0	0	0	0	0	0	0	0	0	0	1.00376
9930012K11Rik	60.7087	37.8592	23.6525	27.9325	66.4595	46.4956	37.3061	41.1463	59.2491	44.1141	38.9212	61.4344	44.6779	35.1386	37.0242	33.6474
9930014A18Rik	115.295	99.5037	97.8497	54.9042	110.749	101.504	73.2347	60.6021	97.8041	76.9283	64.8371	109.588	107.78	85.4145	103.085	137.785
9930021J03Rik	689.612	760.117	527.831	800.752	698.94	615.57	781.007	798.968	659.425	716.899	672.046	781.388	507.988	652.089	817.691	752.25
9930104L06Rik	283.551	262.515	279.236	243.481	294.855	286.777	217.086	239.516	233.231	239.873	233.913	206.927	223.529	242.075	233.575	207.839
9930111H07Rik	0	0	0	2.09821	0.773188	0	0	0	0	0	0	0	0	0	0	0
9930111J21Rik1	131.426	236.663	191.742	505.813	339.222	377.705	515.81	400.47	189.693	204.1	278.165	393.377	91.1244	323.341	445.905	263.537
9930111J21Rik2	40.8242	60.9561	48.8595	97.4319	63.2988	91.1372	52.6252	55.352	54.2031	14.5002	40.3371	53.5946	34.8024	38.5345	37.3069	39.2089
A030001D20Rik	93.1844	111.232	110.711	62.2251	49.8127	50.7858	76.0392	89.3761	89.8108	102.333	96.3945	103.311	52.3631	91.4004	69.5378	68.5121
A130010J15Rik	164.03	158.275	171.391	154.74	144.521	174.97	194.062	178.631	182.631	199.406	206.598	176.069	149.486	152.873	205.046	165.897
A130030D18Rik	0	0	0	0	0	0	0	0	0	0	0	0	0	0	0	0
A130077B15Rik	9.39661	3.92071	18.0098	23.1223	12.3156	11.7613	9.77286	12.7085	2.2512	6.76489	9.58368	6.27343	9.73554	13.3369	8.17484	3.04932
A1bg	0	0	0	0	0	0	0	0	0	0	0	0	0	0	0	0
A1cf	0	0	0	0	0	0	0	0	0	0	0	0	0	0	0	0
A230001M10Rik	26.2402	27.5507	11.9064	4.18535	8.50944	1.07296	4.86619	9.2365	28.1473	9.6936	4.79822	11.6882	4.33887	8.35653	4.6677	5.01982
A230009B12Rik	0	1.64735	1.08737	0	0	0	0	1.2551	4.52144	0	0	0	0	0	0	0
A230020J21Rik	0	0	0	0	0	0	0	0	0	0	0	0	0	0.83394	0	0
A230028O05Rik	1.04554	1.96553	0.996756	4.18968	0.771035	5.35818	2.93425	2.30692	2.25423	0.963621	0.959867	0	3.25205	0.835884	0	1.00803
A230050P20Rik	277.959	304.453	274.603	313.003	378.499	316.3	260.733	191.769	257.127	304.148	297.024	379.916	234.259	231.289	275.312	245.935
A230051N06Rik	0	0	0	0	0	0	0	0	0	0	0	0	0	0	0	0
A230056J06Rik	8.29191	8.78182	6.0146	3.18373	0.769003	6.40126	0	2.33947	5.58234	8.67864	0	3.61709	2.15923	9.19725	4.74144	0
A230056P14Rik	15.8468	15.7896	13.9048	10.4353	21.7054	15.0316	22.2435	14.9466	23.7377	14.6409	11.4339	17.1673	27.1236	24.9957	30.2707	32.0104
A230057D06Rik	0	1.93368	1.0102	0	2.28086	6.3496	6.95793	5.83159	0	1.89969	6.75766	10.7078	0	0.827441	3.52762	1.02834
A230070E04Rik	4.20767	2.98618	0	4.15884	0	0	0	1.14711	4.55271	1.93042	4.78595	0.905577	1.08238	0.831096	0	0
A230072C01Rik	89.828	83.5473	53.3558	41.2006	59.1322	77.5244	53.5285	62.1112	104.294	63.3926	48.1335	40.7153	79.1156	47.0064	60.3986	80.8747
A230072E10Rik	0	0.968377	2.00384	7.39371	2.2864	1.05846	2.96635	1.16099	5.58009	1.91701	5.81535	4.48386	2.15624	6.67098	0	9.25808
A230077H06Rik	0	0	0	0	0	0	0	0	1.13499	0	0	3.59715	0	0	0	0
A230083G16Rik	5.31937	0	0	1.03943	1.56024	0	0.957925	1.14884	2.25821	2.92416	0	0	4.33737	0.83119	0	0
A230103J11Rik	1.06677	8.02139	0.987002	1.02855	6.27043	1.08558	6.66729	3.40897	2.34569	2.00577	0.967274	1.84891	7.81393	2.13833	11.8016	3.03757
A230107N01Rik	19.806	7.52397	9.19003	10.9053	17.1173	5.1942	8.29508	8.41931	7.50861	17.6281	15.9187	9.07329	17.741	16.3217	4.88343	10.7054
A230108P19Rik	0	0	0	0	0	0	0	0	0	0	0	0	0	0	0	0
A2m	8.45503	3.96849	0.986067	20.762	0.778574	2.15822	8.70063	22.9414	0	8.77173	4.78097	2.69192	9.80502	0.839234	0	2.98471
A2ml1	2.10649	15.8307	7.8986	10.4063	10.8716	38.8009	56.2992	11.4961	14.7205	33.0031	11.5064	19.676	37.0307	51.229	24.4373	16.9441
A330008L17Rik	0	0	0	0	0	0	0	0	0	0	0	0	0	0	0	0
A330009N23Rik	54.5951	63.8731	61.6425	42.3979	43.728	61.6454	54.0782	30.1839	64.5006	67.5368	44.0685	31.3323	33.9938	29.2391	46.5679	34.6444
A330015K06Rik	0	0	0	0	0	0	0	0	0	0.965162	4.83373	0.899728	0	0.835351	0	0
A330023F24Rik	562.088	457.92	444.322	248.296	569.747	555.389	375.307	292.186	408.531	445.238	446.255	458.935	367.175	380.581	287.225	362.552
A330032B11Rik	1.0473	0	0	0	3.89201	1.08162	0	0	1.10785	2.8693	0.972509	2.70642	0	0	0	3.07909
A330033J07Rik	0	0.99016	0	1.04104	0	3.232	0	0	0	0	0	0	0	0	0	1.00376
A330035P11Rik	14.5967	22.5225	27.0592	34.7234	11.5393	16.0026	20.5447	11.5679	12.3366	10.6249	15.3432	11.6977	10.7836	15.7952	14.0345	15.3057
A330040F15Rik	0	0	2.00076	1.02887	0	0	0	0	1.13992	0	0	0	0	0.819471	2.31898	2.03199
A330041J22Rik	7.06659	7.7129	0	0	3.7995	15.902	5.16059	8.404	6.50104	4.66433	10.9573	4.5754	6.27517	6.53951	10.9168	2.09326
A330048O09Rik	12.3611	4.83353	5.05967	21.3145	0.760938	0	0	2.35154	4.46223	1.91893	1.95251	4.55922	0	3.32785	0	0
A330049N07Rik	0	0	0	0	0	0	0	0	1.13036	0	0	0	0	0	0	0
A330069E16Rik	14.3483	11.5778	10.0743	15.9807	29.6533	14.8164	23.9047	17.6343	24.3001	11.4122	11.6708	17.1974	20.2719	15.6799	10.6895	26.8861
A330070K13Rik	0	0	0	0	0	0	0	0	0	0	0	0	0	0	0	0
A330074K22Rik	47.9478	20.0296	35.5275	61.8688	84.5773	93.1746	54.3291	43.273	30.8911	31.3381	33.1847	26.1826	67.6353	38.5083	41.4541	65.4369
A330076C08Rik	0	0	0	0	0	0	0	0	0	0	0	2.67425	0	0	0	1.01678
A330076H08Rik	0.929741	0.895449	0	5.66535	0.715272	0	1.10401	2.52858	5.10213	10.6871	0	0	0	3.99409	1.30431	3.39505
A330093E20Rik	0	0	0	0	0	0	0	0	0	0	0	0	0	0	0	0
A330094K24Rik	52.0821	27.7959	71.1365	32.1708	25.7197	35.6409	45.9651	28.6676	51.025	42.1926	47.5425	60.6444	39.2047	33.4141	54.4387	30.7241
A330102I10Rik	47.0172	49.0033	30.3584	41.4256	30.0005	43.883	17.8398	21.5844	48.2853	80.5657	16.2779	55.6424	41.7556	24.337	28.1142	40.2166
A3galt2	5.31047	3.98211	8.87426	7.25052	10.9412	9.71718	7.67642	3.43117	5.67803	10.7739	5.70517	9.02769	5.44226	5.85621	4.6287	8.94568
A430005L14Rik	246.381	279.746	306.562	243.647	280.638	274.856	229.833	262.419	239.374	273.814	204.714	212.074	266.639	230.117	224.852	278.197
A430033K04Rik	174.173	144.676	140.198	133.939	139.978	136.181	102.23	123.348	171.316	128.92	145.68	144.431	117.171	112.023	85.0695	124.899
A430035B10Rik	24.5545	29.9342	21.4652	17.5418	20.0266	17.5791	12.543	25.4406	20.1761	25.8333	20.0439	8.19546	36.277	16.2789	14.7573	21.5603
A430046D13Rik	399.408	341.943	341.102	244.973	252.512	248.897	210.973	241.45	310.105	326.732	279.178	275.91	271.579	230.782	224.33	237.403
A430057M04Rik	7.46161	3.00829	0.988582	3.08734	7.0514	4.33326	6.68064	13.6228	3.43876	5.87906	3.78406	3.61651	5.44278	1.66885	6.91956	4.96865
A430078G23Rik	0	2.97225	5.9395	32.2615	3.88794	2.15242	10.6424	1.14841	2.26354	2.92539	14.3132	3.60539	7.59332	3.34074	3.49069	4.99698
A430078I02Rik	24.7115	9.08534	15.2443	22.3451	5.53683	11.6603	17.9773	4.68976	6.81222	6.81843	18.7075	14.473	4.3385	15.8463	9.33845	12.145
A430085M09Rik	0	0	0	0	0	0	0	0	0	0	0	0	0	0	0	0
A430088P11Rik	0	1.98399	0	0	0	0	0	0	0	0	0	0.902975	0	0	0	0
A430089I19Rik	0	0	0	0	0	0	0	0	0	0	0	0	0	0	1.16301	0
A430090L17Rik	0	0	0	0	0	0	0	0	0	0	0	0	0	0	0	0
A430093F15Rik	0	4.95827	4.93974	9.35831	2.33579	4.31476	3.86308	2.29708	4.53397	0	2.86458	2.70016	2.17729	3.34979	1.16178	0.9953
A4galt	152.448	128.713	171.821	175.716	103.745	206.581	215.746	117.184	173.6	147.055	120.866	125.927	114.446	156.434	114.552	116.598
A4gnt	0	0.991997	0	0	0	0	0	0	0	0	0	0	0	0	0	0
A530006G24Rik	0	0	0	0	0	0	0	0	0	0	0	0	0	0	0	0
A530010L16Rik	3.22274	0	0	2.06858	0	2.17564	0.947995	4.574	0	0	0.944966	1.82271	4.37148	0.833977	1.15312	0
A530013C23Rik	7.34265	8.01827	20.9215	14.596	17.1011	17.2818	24.1955	16.9045	15.9477	11.805	18.709	10.8851	18.6372	13.1843	13.9811	5.99512
A530016L24Rik	64.9904	50.9812	75.9153	91.8879	55.5885	45.4317	60.1901	62.7012	78.7543	70.6089	52.1504	68.702	34.8638	46.8352	31.1606	75.3285
A530021J07Rik	0	0	0	0	0	0	0	0	0	0	0	0	0	0	0	0
A530032D15Rik	2.10139	3.9404	17.949	58.5965	31.6969	8.58701	6.77766	18.4393	12.4014	2.92029	10.4932	14.4327	12.9805	5.82466	8.15224	18.1837
A530046M15Rik	0	0	0	0	0.778683	0	0	0	0	0	0	0	0	0	0	0
A530050N04Rik	0	0	0	0	0.778683	0	0	0	0	0	0	0	0	0.83394	0	0
A530053G22Rik	0	0	0	0	0	0	0	0	0	0	0	0	0	0	0	0
A530058N18Rik	0	0	0	0	0	0	0	0	0	0	0	0	0	0	0	0
A530064D06Rik	8.31034	6.55439	8.75366	26.5551	0	19.126	16.1596	18.0465	14.3969	6.33777	5.57919	5.22125	9.50155	11.4302	9.03463	2.89413
A530065N20Rik	0	0	0	3.12511	0	0	0	0	0	0	0	1.80595	0	0	0	0
A530072M11Rik	2.11702	7.93213	8.90257	6.24576	16.3519	0	10.606	0	14.7285	4.87228	8.60401	4.49282	2.18117	5.03229	2.31683	9.95125
A530088E08Rik	0	0	0	1.03768	0.780559	1.08346	0.962016	0	2.27178	0	0	0.895503	1.08509	0.833367	0	0
A630001G21Rik	23.8952	53.7265	36.957	108.491	57.598	66.138	45.2871	33.6757	24.6094	14.4344	32.754	25.1742	20.4592	39.0794	56.4777	30.5442
A630001O12Rik	0	2.96798	0	1.04358	0	0	0.969354	0	0	5.84364	0	0	0	0.834902	1.16145	0
A630010A05Rik	0	0	0	0	0	0	0	0	0	0	0	0	0	0	0	0
A630012P03Rik	0	0	2.96327	0	0	1.07498	0	0	0	0	0	0	0	0	0	0
A630019I02Rik	22.0391	22.6574	31.7621	13.5993	6.96859	17.1536	29.1783	28.8455	19.1221	18.4522	22.9898	21.6471	10.8118	15.8414	12.845	10.0654
A630023A22Rik	0	0	0	0	0	0	0	0	0	0	0	0	0	0	0	0
A630023P12Rik	0	0	0	0	0	0	0	0	0	0	0	0	0	0	0	0
A630066F11Rik	33.7103	32.6408	28.0883	17.7196	20.8951	32.3021	12.5025	28.6329	44.3651	23.3107	35.1788	36.9078	27.1885	20.8309	12.7325	17.1387
A630072M18Rik	260.423	271.601	256.612	321.647	283.765	267.165	217.757	287.438	186.141	284.774	201.3	220.702	260.937	254.69	180.724	239.601
A630073D07Rik	0	0	0	0	0	0	0	0	0	0	0	0	0	0	0	0
A630075F10Rik	0	0.991997	0	0	0	0	0	0	0	0	0	0	0	0	0	0
A630076J17Rik	1.03585	0	3.01528	0	0	0	0	0	0	0	0.952737	0	0	0	0	2.0152
A630077J23Rik	1.06439	0.994475	2.95957	2.07169	2.33936	5.42074	4.7697	3.43906	3.41446	0.980057	1.90225	2.71144	1.09281	2.51093	1.15623	0.986114
A630089N07Rik	20.4586	11.5332	7.14435	13.9222	9.83674	15.7774	15.9585	24.6177	4.41317	20.0528	2.8938	18.9527	10.6372	18.8981	26.0615	6.31842
A630095E13Rik	0	0	0	0	0	0	0	0	0	0	0	0	0	0	0	0
A630095N17Rik	0	0	0	0	0	0	0	0	0	0	0	0	0	0	0	0
A730004F24Rik	0	0	0.988059	0	0	0	0	0	0	0	0	0	0	0	0	0
A730006G06Rik	0	0	0	0	0	0	0	0	0	0	0	0	0	0	0	0
A730008H23Rik	275.004	267.509	213.748	259.083	327.253	186.988	275.278	230.304	224.611	217.305	243.003	185.679	180.972	250.588	315.788	243.048
A730013G03Rik	8.49396	0	2.93967	0	0.777664	4.30731	0	0	0	2.94314	0.944778	0.909561	1.09449	0	1.1454	0
A730017C20Rik	14.4253	23.9695	12.6497	13.17	8.31361	14.7191	16.9615	17.5735	29.9664	18.2665	23.0318	15.5813	16.8819	17.2307	10.9417	10.7048
A730017L22Rik	59.7958	54.1132	53.8865	57.6218	68.7653	51.3654	52.5218	41.4859	56.3304	47.5965	46.7952	61.2548	36.733	54.0781	47.7952	43.5908
A730018C14Rik	0	0	0	0	0	0	0	0	0	0	0	0	0	0	0	0
A730020E08Rik	10.5532	26.6174	10.3228	3.34544	8.76105	13.2673	7.50681	13.5811	6.25161	2.72628	11.2103	0	3.05968	13.6764	5.04405	1.10922
A730020M07Rik	162.591	105.798	155.587	134.453	92.4477	121.416	130.524	172.41	153.104	156.797	143.043	184.151	110.954	141.979	67.4982	117.439
A730035I17Rik	0	0	0	0	0	0	0	0	0	0	0	0	3.28905	0.821985	0	0
A730036I17Rik	9.4763	3.95406	1.98178	6.25393	8.53667	7.52686	2.90817	2.29993	6.77801	0	4.78167	2.695	4.34165	6.68977	2.32557	3.00785
A730043L09Rik	0	2.98786	1.97243	1.03479	0	1.0821	0	5.72088	0	0	3.80528	1.81694	0	1.6752	2.31408	0
A730046J19Rik	228.411	128.287	135.735	115.558	263.59	294.192	148.528	129.958	133.243	132.773	175.127	178.924	153.754	108.512	111.405	233.837
A730056A06Rik	52.8409	28.9555	52.3182	10.3083	12.8779	37.7876	22.9589	12.9071	21.4287	41.0017	20.4932	26.2554	27.4022	22.81	12.5918	18.8653
A730063M14Rik	39.8073	37.9919	39.1177	20.5996	41.101	17.6237	28.6801	29.607	19.7522	39.2063	38.5071	31.0365	37.7208	25.0265	18.2834	30.9896
A730081D07Rik	14.7491	12.8612	10.8547	12.4907	21.7442	10.7864	2.90594	5.75624	18.1011	21.3739	12.4599	10.7706	7.61338	1.6763	19.7975	9.96226
A730082K24Rik	0	0	0	0	0	0	0	0	0	0	0	0	0	0	0	0
A730085K08Rik	0	0	0	0	0	0	0	0	0	0	0	0	0	0	0	0
A730090N16Rik	4.1421	2.93321	0	0	0.770943	2.14625	0	1.19764	0	0	0	0.90479	2.11952	3.28896	0	2.07202
A730098A19Rik	0	0	0	0	0	0	0	0	0	0	0	0	0	0	0	0
A830009L08Rik	4.20578	0	0	0	0	1.07697	0	0	0	0	0.957367	0	0	0	1.16181	0
A830010M20Rik	154.55	179.735	137.439	140.543	204.295	155.513	159.972	122.096	160.816	173.487	168.435	212.174	117.163	158.88	132.004	143.682
A830011K09Rik	0	0.991997	0	0	0	0	0	0	1.10962	0.973447	0.953448	0	0	0	2.37754	0
A830018L16Rik	1.78568	0	0	0.907213	0.637098	0	0.802047	0	0	2.94785	0	3.84483	0	1.45385	0	0.893347
A830019L24Rik	0	0	0	0	0	0	0	0	0	0	0	0	0	0	1.16301	0
A830019P07Rik	0.978237	3.71665	6.20124	3.30814	2.2077	14.4065	8.39276	3.64528	1.06981	0.927748	1.00623	0.919243	10.4244	0.815009	0	2.20482
A830029E22Rik	0	0	0	0	0	0	0	0	0	0	0	0	0	0	0	0
A830035O19Rik	12.9213	12.1238	9.90878	6.13965	16.5039	10.8766	10.3765	12.3674	8.11026	13.7627	14.1677	13.6954	16.3608	10.7824	17.1552	11.8083
A830036E02Rik	1.05371	0	0	0	0	0	0	0	0	0.968474	0	0	0	0	1.16935	0
A830052D11Rik	1.07299	1.01182	0	2.05302	3.15047	0	0.945851	1.13436	2.3072	0.977653	4.70058	0	1.09212	0	4.57011	0
A830082K12Rik	47.6353	89.6889	58.8096	40.0995	39.1463	54.4097	40.4313	44.3149	53.4137	48.9488	61.9967	64.1418	44.0561	62.3476	35.4161	39.5685
A830082N09Rik	38.7826	50.9608	36.5228	28.8852	60.6247	35.7698	46.1856	39.8792	70.5033	56.1386	52.3949	56.591	43.6425	47.8678	51.0848	62.9282
A930001A20Rik	0	0	0	0	0	3.22397	0	0	0	0	0	0	0	0	0	0
A930001C03Rik	9.04891	7.47038	2.12237	1.71152	9.95843	0.897015	2.02115	1.21263	1.84547	0	0.983897	7.45773	7.96511	4.34606	5.94177	10.3238
A930002C04Rik	78.0482	54.3248	60.4266	29.1828	31.0342	49.4587	44.6073	47.1233	61.1053	53.4756	47.8559	58.319	57.7104	36.0357	26.7433	51.8721
A930003A15Rik	0	2.89715	0	1.05684	2.28326	0	1.97323	2.33247	0	0	0	0.896708	0	12.2973	2.34588	2.03895
A930003O13Rik	0	0	0	0	0	0	0	0	0	0	0	0	0	0	0	0
A930004D18Rik	113.067	122.416	132.222	121.456	114.224	88.7404	136.828	106.849	132.473	128.551	102.342	127.053	117.324	123.365	83.408	88.3374
A930005H10Rik	109.396	102.942	98.2625	98.5143	114.83	144.062	129.832	96.1922	95.7916	96.52	117.562	112.679	101.554	100.833	125.969	110.653
A930006I01Rik	0	0	0	0	0	0	0	0	1.13036	0	0	0	0	0	0	0
A930006K02Rik	7.45183	6.01071	0	15.4203	3.905	6.55053	1.90474	3.41047	11.5194	5.82968	12.3037	10.7594	7.67932	2.51393	0	6.8934
A930007A09Rik	28.1083	32.3291	34.9809	18.9316	50.8535	28.8197	28.3847	28.9683	25.7056	39.609	24.978	42.4508	62.3476	28.2235	49.2367	49.9977
A930007I19Rik	2.09626	1.96703	0.995526	4.18715	3.86082	7.50541	2.92515	4.61254	0	1.93698	0	3.58726	3.25628	0	4.67028	5.03856
A930009A15Rik	0	0	0	0	0	0	0	0	0	0	0	0	0	0	0	0
A930011G23Rik	2.10271	0.988079	2.98039	6.27378	1.55137	2.1511	0	0	0	2.90808	0	2.70061	1.08782	0	0	1.00473
A930012L18Rik	9.41947	3.93914	3.99902	11.5073	16.2072	7.4976	2.92507	20.7179	16.9437	15.417	8.65123	7.19777	8.66002	11.6625	16.3203	13.1375
A930013F10Rik	75.2496	99.1218	47.7361	60.8239	96.444	71.7305	67.5107	80.9673	71.8733	90.8313	87.5038	61.0187	47.6104	75.973	71.3692	98.0142
A930015D03Rik	5.34036	0	3.94655	5.18221	5.46874	4.34043	6.64316	4.58889	3.41139	1.9665	7.59875	0.907244	8.75362	6.69185	5.76234	1.96788
A930016O22Rik	13.9522	6.17769	13.079	8.7877	3.22729	5.58731	10.9979	8.29661	5.68748	10.7099	16.2015	5.39801	0	2.50964	8.12769	3.00989
A930017K11Rik	5.35783	0	0	2.03601	3.93816	1.09338	0	1.12138	3.44794	0	0	0	1.07813	4.93257	0	0
A930017M01Rik	1.04938	0	3.95749	4.17329	1.54821	9.67388	3.88342	4.60814	3.38678	9.70201	0	2.69031	2.17251	11.7248	1.1658	0
A930018P22Rik	1.07613	1.00809	0	0.998879	0.778692	1.07985	0	0	1.14808	0	0	0	6.38373	0	0	0
A930019D19Rik	0	0	0	0	0	0	0	0	0	0	0	0	0	0	0	0
A930024E05Rik	27.5658	37.8116	28.6119	15.5285	41.3174	27.0487	8.65247	22.8899	31.8831	24.3879	33.3825	18.8671	27.2729	16.7668	12.7405	31.7374
A930031H19Rik	0	0	0	0	0	0	0	0	0	0	0	0	0	0	4.65203	0
A930033H14Rik	35.8134	52.3756	71.4899	72.9598	152.757	105.233	109.683	71.2126	56.5268	55.372	57.4041	46.799	85.692	80.1338	90.7873	102.35
A930037H05Rik	13.6655	21.7075	20.7667	21.9168	11.6368	13.9732	2.91513	11.529	22.5311	25.2482	20.1352	16.1729	27.1166	14.2198	15.1539	37.1211
A930041C12Rik	5.26856	0	0	0	0	0	0	0	0	0	0	0	0	0	0	0
AA387883	0	0	0	0	0	0	0	0	0	0	0	0	0	0	0	0
AA388235	17.6599	20.5145	43.0029	20.0281	19.9738	21.3072	16.74	17.3981	24.6039	40.472	18.2796	30.5419	26.8883	16.6277	25.8501	16.3508
AA413626	1.07432	4.00986	0	2.07394	2.33608	0	0.942972	4.5938	4.66244	0.977251	0	2.71948	0	0	4.61209	9.74528
AA414768	46.3663	41.59	51.8174	65.5505	73.6485	37.6857	65.7068	66.4631	42.0572	41.7107	36.2712	31.4236	47.871	60.1558	71.8912	60.2446
AA465934	4.29471	0	8.97582	5.16932	7.00118	4.37872	3.73591	5.72451	5.77597	6.86747	9.44889	0	8.83715	5.00779	8.03033	2.93332
AA467197	0	1.95566	16.9575	15.7179	9.18988	6.43417	11.7041	16.2292	2.25464	6.71303	6.75359	0.899395	12.987	9.16144	2.34854	17.1209
AA536875	0	0	0	0	0	0	0	0	0	0	0	0	0	0	0	0
AA543186	3.15148	10.8445	1.99178	3.13483	1.54848	2.14692	2.90952	1.15112	0	6.77959	0.957455	0.898156	6.51756	1.67054	1.16166	3.02335
AA543401	0	0	0	0	0	0	0	0	0	0	0	0	0	0	0	0
AA545190	0	0	0	0	0	0	0	0	0	0	0	0	0	0	0	0
AA619741	0	0	0	0	0	0	0	0	0	0	0	0	0	0	0	0
AA792892	0	0	0	0	0	0	0	0	0	0	0	0	0	0	0	0
AA986860	47.8937	28.9291	29.5762	42.3827	54.73	61.5807	44.0825	28.5434	45.5239	54.948	14.2364	46.1198	68.5242	32.5925	13.8919	43.626
AB124611	48.8048	66.9622	78.4604	273.912	67.0282	81.2749	46.4243	89.6664	53.4393	37.9748	61.5702	59.5629	64.1533	34.015	82.0262	32.0413
AF067061	0	0	0	5.20851	0	0	0	0	2.3028	0.98374	0	1.7682	0	0	0	0.996245
AF067063	0	0	0	0	0	0	0	0	0	0	0	0	0	0	0	0
AF357355	0	0	0	0	0	0	0	0	0	0	0	0	0	0	0	0
AF357359	0	0	0	0	0	0	0	0	0	0	0	0	0	0	0	0
AF357399	0	0	0	0	0	0	0	0	0	0	0	0	0	0	0	0
AF357425	0	0	0	0	0	0	0	0	0	0	0	0	0	0	0	0
AF357426	0	0	0	0	0	0	0	0	0	0	0	0	0	0	0	0
AF366264	0	0	0	0	0	0	0	0	0	0	0	0	0	0	0	0
AF529169	6.33459	11.8869	13.8436	4.16089	4.66825	6.46074	9.66555	3.44398	11.3106	15.5935	13.3714	9.88897	8.69622	12.5572	1.16097	8.00033
AI115009	0	0	0	0	0	0	0	0	0	0	0	0	0	0	0	0
AI182371	6.23402	10.7232	3.97411	3.13666	8.42521	4.25648	0.975374	14.3468	6.94072	3.02242	6.60102	2.64396	8.84324	9.80809	3.45008	1.9873
AI197445	1.58193	4.19172	2.96806	1.30585	3.55998	1.99807	0.609281	5.17133	1.94064	2.50521	0.831547	5.4228	0.935383	15.7903	0	0
AI314278	0	0	3.95224	0	0	0	0	0	0	0	0	0.902975	0	0	0	0
AI413582	155.3	146.434	132.365	217.876	174.798	184.791	161.87	187.389	116.265	113.842	143.555	122.782	148.501	113.722	190.168	141.679
AI427809	18.0059	34.7244	12.9964	51.0494	25.0131	25.9401	25.3709	24.3824	32.5197	32.0633	12.4812	29.7945	19.4582	25.0274	33.9433	19.0587
AI429214	55.1098	45.0027	59.8329	36.8072	56.1229	63.132	83.4316	35.9872	66.113	51.8915	46.3629	44.939	70.2351	37.5471	46.9889	59.5925
AI450353	37.9807	31.24	22.418	49.8576	21.6931	36.4805	19.5238	25.0824	21.6154	29.897	20.7312	26.2219	25.1841	31.904	26.6683	35.1855
AI463170	9.7525	0	7.9852	5.14833	3.93941	0	3.75522	9.10977	12.7113	1.96218	0.933808	8.1794	3.28232	3.31858	2.28143	0
AI464131	617.37	512.146	640.545	385.195	262.327	469.867	404.237	532.363	533.12	485.691	557.279	463.544	357.186	416.047	351.416	331.771
AI467606	61.3394	57.9715	67.2981	201.258	54.6865	62.8669	43.1581	62.723	62.86	73.813	65.6764	69.1545	50.1517	49.4332	54.2735	59.9441
AI504432	9.49096	23.5815	17.7971	24.8286	25.2782	20.1771	23.8907	19.8825	6.17872	32.4657	26.4127	19.2755	10.0936	19.912	40.4387	28.4168
AI506816	3.09442	13.5378	13.1917	15.9442	17.4401	11.7221	45.1032	4.69275	7.8551	12.4693	23.3741	15.6246	21.6378	19.0809	22.5569	12.3762
AI507597	0	0	0	0	0	0	0	0	0	0	0	0	0	0	0	0
AI593442	42.5576	16.3119	57.8079	187.144	22.7023	11.5604	47.7188	104.529	38.3605	33.9808	36.9348	15.4114	31.7506	69.0889	44.1486	28.5164
AI597479	658.74	751.656	642.888	690.637	680.887	675.451	622.05	656.063	595.534	593.403	601.039	636.661	685.982	639.248	623.543	615.87
AI606473	0	0.992561	0	6.23905	3.9006	1.08011	3.85196	0	0	0.974496	0.952605	0	1.08765	2.50952	4.62259	0
AI646519	0	0	0	0	0	0	0	0	0	0	0	0	0	0	0	0
AI661453	207.171	249.766	184.64	148.67	202.726	244.328	187.448	194.574	200.302	222.353	194.443	208.621	157.029	141.24	118.522	167.653
AI662270	38.8942	77.6145	84.5914	223.594	71.0095	75.7378	82.7844	118.72	57.5251	33.2225	53.86	53.2738	55.5653	44.8531	51.2689	49.8687
AI837181	811.356	834.639	876.426	857.095	921.689	902.521	1158.43	966.854	773.654	754.899	781.424	692.455	826.983	822.432	798.763	825.386
AI839979	20.0991	18.803	25.7327	29.1379	23.3163	38.8447	19.2386	34.4908	12.4591	13.6454	15.2843	17.1088	21.8087	22.6057	22.0153	18.914
AI847159	0	0	0	0	0	0	0	0	0	0	0	0	0	0	0	2.00752
AI854703	93.0331	43.0437	55.1935	42.2698	56.4443	60.5814	40.0041	37.5591	57.0803	40.3492	54.984	33.5978	32.6428	65.8569	69.1106	55.4205
AI987944	327.645	336.368	232.459	316.253	376.572	341.778	282.247	305.384	427.624	339.006	310.023	338.645	138.108	314.994	249.979	289.184
AU015228	0	0	0	0	0	0	0	0	0	0	0	0	0	0	0	0
AU015791	0	3.96198	4.95032	1.03842	2.33198	1.07932	0	3.44082	0	0	0	0	2.16126	0	0	0
AU015836	0	0	0.988059	0	0	0	0	0	0	0	0	0	0	0	0	0
AU016765	0	0	0	0	0	0	0	0	0	0	0	0	0	0	0	0
AU018091	0	0	0	0	0	0	0	0	1.13036	0	0	0	0	0	0	0
AU019990	7.67439	0	0	0	4.54147	0	1.824	0	0.642134	0.551317	1.39726	0	3.15432	0	0	2.92724
AU021063	0	0	0	0	0	0	0.968483	0	0	0	0	0	0	0.83394	0	0
AU021092	186.873	125.411	173.513	192.524	333.777	255.802	187.268	202.448	172.39	147.102	243.325	198.536	181.346	140.712	226.102	226.251
AU022252	229.892	221.398	157.77	235.825	213.414	252.053	244.737	252.514	192.485	204.671	196.028	211.26	206.086	224.273	242.268	181.415
AU022751	0	0	0	0	0	0	0	0	0	0	0	0	0	1.66788	0	0
AU022754	0	2.97452	0	0	0.779069	0	0	0	6.79006	2.94057	0.94673	2.70881	1.08431	0.833141	0	0
AU022793	0	0	0.993448	0	5.38794	0	2.92339	0	0	0	0.95812	0.897802	0	0	3.49564	1.0058
AU023762	15.44	4.8512	6.08464	5.33833	0.763348	6.36868	0.995192	0	12.1927	12.4392	13.5198	25.232	5.33556	6.60868	1.18188	1.03992
AU040320	1902.38	1922.5	2340.6	2342.74	1338.51	1594.08	1645.12	1960.06	1563.31	1660.08	1867	1614.92	1387.06	1619.97	1491.43	1416.13
AU040972	0	0	0	0	0	2.14931	0	0	0	0	0	0	0	0	0	0
AU041133	39.8399	64.8557	20.7799	41.5635	77.2013	42.3793	45.1372	63.2899	57.1141	63.7438	55.7058	64.3793	15.6612	60.8358	87.0199	66.5735
AV026068	435.208	416.625	313.775	250.83	369.166	350.543	356.663	352.332	352.369	376.153	391.22	374.902	347.764	280.281	280.842	380.54
AV039307	0	14.3536	0	1.61557	1.99233	0.924664	5.77381	1.9626	2.94324	6.69731	1.49711	1.54476	2.82291	7.22396	1.81391	1.70791
AV051173	1.07926	0	5.96228	1.02538	1.5733	1.09712	2.80891	1.1344	0	3.94326	0	4.55791	1.09941	0	6.86152	1.96349
AV064505	0	0	0	0	0	0	0	0	0	0	0	0	0	0	0	0
AV205837	0	0	0	0	0	0	0	0	0	0	0	0	0	0	0	0
AV320801	0	0	0	0	0	0	0	0	0	0	0	0	0	0	0	0
AW011738	189.669	162.8	174.038	209.522	193.595	185.378	247.649	135.629	116.803	154.484	121.97	157.557	173.893	196.579	184.722	138.071
AW046200	6.11551	8.674	3.04479	9.6101	5.30698	13.7297	3.99312	18.8027	2.20304	6.65027	11.6429	8.17497	8.47919	16.4031	5.95682	12.5638
AW112010	206.459	220.28	428.122	914.528	253.486	349.663	241.44	226.836	209.24	193.606	219.269	237.908	233.435	167.146	239.51	172.994
AW146154	150.224	114.788	76.5397	101.102	158.332	95.4539	114.64	129.779	98.5072	129.133	112.57	145.754	69.7957	108.131	101.51	118.573
AW209491	227.069	221.007	229.054	200.958	218.011	238.424	155.872	223.882	203.58	204.649	184.156	182.172	198.154	202.957	128.117	199.137
AW495222	0	0	4.96691	1.04211	3.09684	0	0	0	0	0	3.82026	0	0	3.34036	0	0
AW549542	9.57377	8.95603	10.8407	5.17906	37.4851	12.9706	34.4731	16.0285	12.4987	10.7861	25.6808	18.0736	11.9873	11.7141	13.8835	24.746
AW549877	1272.3	1277.65	1106.01	1064.18	1563.1	1314.44	1148.49	1093.17	1104.45	1276.06	1148.95	1159.11	1262.37	1134.46	1064.7	1208.47
AW551984	20.9634	34.5852	27.176	36.104	33.2899	22.5798	32.536	16.3157	18.6522	26.1353	22.1752	27.8922	19.4962	47.6545	32.8677	41.8658
AW554918	277.845	225.955	253.045	174.742	307.536	228.328	223.998	209.565	265.611	246.753	242.426	293.858	240.724	215.946	249.51	268.952
AW822252	0	0	0	0	0	0	0	0	1.13956	1.96207	2.84648	1.81105	0	0	5.75461	0
AY074887	0	0	0	0	0	0	0	1.14688	0	0	0	0	0	0	0	0
AY358078	0	0	0	0	0.775217	3.23838	0	0	0	0	0	0	0	0	0	0
AY512915	0	0	0	0	0	0	0	0	0	0	0	0	0	0	0	0
AY512931	0	0	0	0	0	0	0	0	0	0	0	0	0	0	0	0
AY702102	0	0	0	0	0	0	0	0	0	0	0	0	0	0	0	0
AY702103	0	0	0	0	0	0	0	0	0	0	0	0	0	0	0	0
AY761184	0	0	0	0	0	0	0	0	0	0	0	0	0	0	0	0
AY761185	0	0	0	0	0	0	0	0	0	0	0	0	0	0	0	0
Aaas	317.576	298.396	317.578	316.224	304.263	297.418	353.393	358.523	234.59	281.93	288.271	272.604	216.656	302.42	298.187	217.842
Aacs	129.83	196.215	137.292	198.06	227.782	156.739	175.991	177.581	144.035	138.045	91.9071	134.747	176.12	150.292	162.806	134.312
Aadac	3.13529	0	0	0	0	2.14418	0.974775	1.15162	0	0	0	1.78873	0	1.68409	0	1.00367
Aadacl2	0	0	0	0	0	0	0	0	0	0	0	0	0	0	0	0
Aadacl3	0	0	0	0	0	0	0	0	0	0	0	0	0	0	0	0
Aadacl4	0	0	0	0	0	0	0	0	0	0	0	0	0	0	0	0
Aadat	0	0	0	0	3.11473	0	0	0	0	0	0	0.902975	0	0	0	0
Aaed1	669.034	701.471	598.385	557.032	591.791	566.656	510.383	571.829	516.533	522.608	551.009	483.101	519.295	542.883	465.971	513.227
Aagab	553.49	525.924	555.409	635.806	530.075	490.562	565.982	505.778	431.15	495.062	463.75	469.914	423.918	460.516	500.779	445.501
Aak1	3401.56	3294.09	3145.39	3025.85	3234.84	3215.99	3382.2	3408	2922.61	2894.41	2776.04	3312.41	2843.11	3088.48	3029.57	3122.69
Aamdc	700.227	844.329	657.513	547.384	631.976	745.673	619.192	669.872	601.369	649.198	640.294	494.277	678.963	596.001	546.989	581.405
Aamp	2235.04	2107.23	2211.52	1862.77	1973.48	1944.97	1843	2016.18	1991.91	1829.11	1914.97	1920.83	1771.95	1800.41	1882.32	1603.13
Aanat	0	1.011	0	0	0	0	0	1.12533	0	0	0	0	0	0	0	0
Aar2	541.756	530.775	554.342	661.907	432.719	558.528	579.497	536.874	463.609	501.193	521.951	456.485	423.887	480.127	425.562	391.476
Aard	15.734	7.89156	10.0417	9.40419	6.16823	10.6958	3.89536	0	0	3.85579	12.4916	8.17735	14.0328	10.7409	8.15607	1.01159
Aars	1747.21	1956.32	2041.62	2185.29	1606.46	1756.36	1984.99	2346.47	1780.09	1527.57	1541.65	1457.01	1383.97	1798.9	1559.21	1535
Aars2	567.003	465.946	664.407	477.255	295.877	527.906	494.438	539.021	525.655	413.113	517.667	452.748	377.151	463.329	365.849	330.446
Aarsd1	677.941	488.374	582.548	450.113	409.676	471.233	479.134	417.908	521.507	478.646	492.112	462.217	415.79	453.229	458.395	370.36
Aasdh	329.294	413.657	290.407	331.996	288.344	324.941	308.275	268.828	313.388	360.502	313.409	294.789	273.707	318.791	346.919	269.589
Aasdhppt	403.312	367.331	382.409	336.348	286.512	310.311	336.425	333.62	366.685	362.959	324.792	293.139	280.351	344.705	303.095	315.64
Aass	45.6772	78.3188	50.7794	70.4504	100.774	81.2985	49.1872	35.9902	40.3047	58.5994	72.4367	74.5384	45.271	41.6854	75.2613	42.6046
Aatf	266.211	315.668	215.828	240.141	230.852	253.483	220.732	183.166	238.226	211.726	254.615	224.653	221.543	269.989	184.071	179.282
Aatk	251.501	229.702	183.61	158.503	144.112	203.279	178.401	222.12	190.388	178.292	261.7	232.48	201.71	192.313	144.126	189.433
Abat	2954.08	2742.39	2980.16	2013.69	1796.83	2621.41	2565.99	3411.84	2598.32	2403.32	2240.35	2370.51	1955.3	2434.54	1901.22	1616.79
Abca1	1530.18	1938.13	1416.71	1944.32	1750.03	2194.53	1601.44	2258.21	1098.21	1355.65	1403.76	1510.35	1162.94	1248.98	1229.7	1311.93
Abca12	161.953	100.833	120.52	73.9474	41.8937	43.0887	56.4158	64.405	96.2612	116.274	130.539	135.676	93.6716	64.7085	50.0682	65.8679
Abca13	2.07113	5.84202	4.0073	9.51288	1.53325	7.44177	7.9037	1.16318	3.33928	0.96039	2.89567	6.28183	5.3755	0	1.176	2.04853
Abca14	0	0.975995	0	1.0536	1.53352	1.06553	2.95899	1.15911	0	0	0	0	1.07498	0	4.67649	0
Abca15	0	0	0	0	0	0	0	0	0	0	0	0	2.16126	0	0	0
Abca16	0	0	0	0	0	0	0	0	1.13036	0	0	0	0	0	0	0
Abca17	0	0	0	0	0	0	0	0	0	0	0	0	0	0	1.16301	0
Abca2	2023.98	1976.06	2164.41	2095.29	1848.55	2123.79	2170.8	1995.46	1909.97	1563.25	1821.81	1755.47	1810.63	1920.48	1960.04	1693.39
Abca3	1320.65	1307.26	1516.27	1444.68	1433.57	1317.63	1384.58	1314.49	1156.56	1198.42	1207.44	1238.79	1242.31	1053.8	1218	1301.01
Abca4	36.0737	24.8328	10.8172	17.64	35.1504	19.4158	33.6854	37.8417	55.458	47.0102	26.704	61.2933	18.5008	36.0321	26.6572	25.8156
Abca5	408.632	372.297	325.379	347.176	374.624	345.844	396.175	381.866	360.12	394.121	377.229	365.207	335.485	390.65	422.792	409.482
Abca6	560.82	480.578	630.527	335.338	543.305	745.818	775.43	656.081	551.11	633.622	575.858	616.642	634.766	514.993	574.939	448.971
Abca7	688.724	633.678	565.975	887.432	426.432	605.251	590.036	705.303	683.059	520.773	612.846	594.217	406.318	473.357	474.906	421.216
Abca8a	3559.43	3245.13	3618.25	2676.64	3645.33	4335.33	4206.49	3608.94	3164.13	3349.25	3256.91	3431.06	4041.36	3797.1	4094.76	3373.56
Abca8b	1065.91	1165.28	1083.43	1020	1058.15	1226.85	1447.2	1255.54	916.137	1004.8	1079.07	859.915	936.622	1312.5	1207.54	954.378
Abca9	1150.98	1236.96	1147.43	1312	1246.09	1572.61	1464.13	1414.99	1007.73	1008.28	991.704	1078.93	1365.27	1244.73	1262.85	1141.5
Abcb10	1081.11	994.335	1041.6	948.674	715.142	919.795	894.821	1016.01	1052.97	864.504	893.045	900.073	759.154	855.843	746.554	624.119
Abcb11	0	0	0	0	1.5491	4.29994	3.88499	2.29874	0	0	0	1.78421	2.17531	2.51595	0	0
Abcb1a	550.108	514.134	520.573	630.195	461.513	695.064	652.47	638.868	443.883	440.491	597.195	542.51	537.022	574.102	557.157	577.224
Abcb1b	676.461	733.4	655.055	624.491	1239.22	993.318	1030.98	909.065	527.235	583.436	657.043	563.259	980.226	625.692	881.819	920.747
Abcb4	430.992	346.877	516.382	265.894	360.213	731.344	747.167	507.648	433.993	358.974	423.51	311.006	607.785	779.859	475.688	446.401
Abcb5	0	0	0	0	0	0	0	0	0	0	0	0	0	0	0	0
Abcb6	294.887	344.143	359.866	331.779	270.357	333.857	329.776	352.887	289.955	214.539	250.167	217.442	273.636	309.668	303.941	341.209
Abcb7	1030.75	987.401	822.129	829.043	743.423	935.707	895.245	1041.09	892.901	834.446	792.125	764.004	608.575	947.823	750.416	695.403
Abcb8	1629.71	1407.87	1671.56	1237.36	934.754	1097.64	1368.12	1466.88	1249.91	1264.57	1391.2	1241.88	1025.36	1185.42	1063.76	1126.99
Abcb9	285.065	281.074	312.051	231.468	245.534	259.987	323.958	315.122	285.133	283.562	248.843	286.596	261.832	333.551	309.385	271.202
Abcc1	869.761	742.508	867.535	903.125	1067.99	1014.21	980.982	929.072	780.787	678.829	727.125	726.831	710.093	777.874	812.881	841.431
Abcc10	264.397	239.327	259.44	211.775	224.565	221.389	258.877	246.283	254.827	183.583	258.325	219.486	204.404	171.823	168.452	246.594
Abcc12	0	2.98317	0	2.08254	0	0	0.966553	0	0	0	1.9077	3.59632	1.0875	0.837356	2.31799	0
Abcc2	0	0	0	2.08421	2.3287	0	0	1.15006	0	0	0	0.901648	0	0	0	1.00524
Abcc3	72.2182	101.263	85.3987	184.948	67.0658	149.143	133.185	199.674	72.4351	52.9735	97.7056	66.0494	58.5423	89.2663	71.7037	81.1394
Abcc4	617.54	552.941	751.255	772.922	580.221	824.872	641.314	590.569	544.547	437.34	495.54	506.593	494.177	498.43	484.561	512.066
Abcc5	1634.82	1756	1315.04	1571.53	1900	1538.17	1657.63	1401.65	1425.83	1423.93	1279.01	1678.83	1477.72	1472.34	1624.85	1633.29
Abcc6	2.10742	0	0	0	0	0	0	0	1.14907	0	0	0	0	0	0	0.987416
Abcc8	4736.1	4636.67	4563.48	4175.36	3600.22	3723.52	3833.28	4426.64	4778.87	3864.14	4420.06	4306.61	3527.4	3846.57	3645.34	3733.56
Abcc9	1891.13	1365.29	2146.98	1865.71	1352.18	2054.28	1983.4	1811.27	1507.74	1672.94	1615.74	1764.78	1998.08	1545.69	1759.92	1821.7
Abcd1	1362.24	1468.33	1474.05	1429.84	1178.17	1349.25	1347.76	1650.43	1094.04	1030.38	1277.55	1116.07	1211.2	1176.95	990.742	1209.25
Abcd2	137.163	87.9138	106.514	134.093	79.9744	153.342	105.069	125.533	148.959	148.36	140.227	116.053	60.798	91.9076	54.7244	102.496
Abcd3	2134.45	1861.09	2193.87	1398.65	1393.15	1839.89	1843.44	1802.87	1931.94	1888.09	1899.75	1749.91	1439.27	1776.74	1554.68	1516.11
Abcd4	432.928	416.7	468.403	420.99	500.484	513.44	509.532	496.875	428.082	380.828	384.603	328.785	402.621	386.343	450.64	421.624
Abce1	1339.76	1498.81	1246.07	1471.03	1487.65	1574.8	1659.97	1592.11	1346.57	1264.58	1136.77	1163.99	1388.3	1491.11	1497.82	1391.27
Abcf1	2175.97	2080.72	2409.72	2049.06	1975.35	2281.1	2104.59	2146.63	1823.73	1902.64	1756.82	1646.75	1959.59	1971.61	1817.61	1939.78
Abcf2	1143.72	1308.01	1206.63	1188.77	1145.07	1369.39	1314.77	1292.63	1146.34	995.754	995.363	986.621	1097.6	1152.91	1006.19	1034.18
Abcf3	1178.45	1114.35	1196.98	1137.11	1039.57	1080.59	1148.66	1210.12	1115.74	1068.76	1001.65	965.776	951.686	1108.24	1128.93	982.795
Abcg1	375.719	404.5	397.015	567.647	307.721	487.795	408.921	590.754	280.23	314.063	307.674	390.892	271.694	296.726	261.856	218.885
Abcg2	780.499	784.218	892.604	676.342	1036.21	1149.22	935.565	873.381	647.034	685.369	702.486	620.571	1032.24	784.444	733.621	970.445
Abcg3	19.7775	46.0113	51.8686	111.363	24.6161	50.2484	38.3745	47.4449	34.8361	24.957	42.5415	50.8454	35.8181	26.836	42.1529	14.1196
Abcg4	45.9616	39.0407	31.5283	36.0887	29.7961	19.445	53.4702	31.8485	23.9841	33.468	42.5603	49.0424	51.0745	27.5062	61.2195	48.4991
Abcg5	4.23417	0	0	0	0.778393	0	0.964423	0	0	0.975824	0	0	0	0	1.16055	0
Abcg8	2.10742	0	0	0	0	0	0	0	0	0	0.95638	0	0	0	0	0
Abhd1	25.4091	26.8033	35.3228	27.7828	45.9333	17.2168	41.7241	29.5582	52.3757	46.2926	57.7665	31.8069	31.5699	24.1936	35.824	43.439
Abhd10	252.795	343.298	316.501	333.949	243.431	242.244	336.723	324.026	322.814	274.591	330.554	225.499	203.782	282.154	272.676	276.846
Abhd11	488.356	479.414	597.999	491.183	434.662	490.788	467.918	446.488	535.661	449.226	394.927	408.433	378.561	408.745	396.031	396.24
Abhd11os	0	1.02517	5.01761	4.07267	33.8168	6.66626	3.68372	5.62967	0	1.95502	3.77777	8.16074	4.48103	3.38457	13.5745	12.8127
Abhd12	1297.52	1374.54	1461	1420.81	1300.62	1602.58	1466.71	1559.34	1159.67	1157.96	1204.12	1149.91	1271	1230.84	1234.61	1155.32
Abhd12b	0	0	0	0	0	0	0	0	0	0	0	0	0	0	0	0
Abhd13	718.762	648.545	752.366	728.098	816.496	713.155	777.75	838.759	611.175	609.644	704.434	604.822	582.704	634.327	559.316	553.35
Abhd14a	328.257	397.23	365.277	320.684	298.94	283.766	368.111	263.258	317.384	340.725	329.999	330.444	335.401	293.681	307.051	297.143
Abhd14b	406.616	457.532	374.488	366.068	449.806	423.549	305.292	330.547	328.746	340.158	390.086	391.141	383.899	325.226	280.59	407.057
Abhd15	50.1875	53.1316	53.4004	99.811	48.5725	69.3364	78.2077	78.253	37.8439	29.3668	26.5395	36.1925	62.1479	65.0902	65.6635	43.6033
Abhd16a	1331.42	1428.62	1492.75	1442.76	1458.84	1574.52	1391.31	1267.82	1168.85	1233.49	1264.62	1209.45	1291.74	1158.75	1525.06	1255.78
Abhd16b	0	0	0	3.12511	0	0	0	0	0	0	0	0	0	0	0	0
Abhd17a	1132.96	1044.34	1216.31	990.19	1039.24	1028.55	1101.52	1241.3	984.019	1015.68	1028.41	924.637	975.522	972.112	1006.64	908.214
Abhd17b	219.853	227.627	210.201	245.094	268.124	268.051	239.415	223.255	189.642	202.891	238.916	205.481	170.823	213.338	227.678	184.821
Abhd17c	599.129	736.785	598.249	799.378	420.365	608.598	642.624	807.776	588.069	468.598	565.696	539.215	601.508	605.591	500.774	472.658
Abhd18	722.874	818.862	842.092	781.76	457.94	553.82	780.027	988.655	652.778	578.626	539.476	561.774	545.009	786.821	486.231	559.216
Abhd2	533.092	498.78	480.908	654.757	561.754	495.413	500.897	549.442	474.122	434.81	429.52	493.028	521.424	469.602	551.34	474.087
Abhd3	157.755	128.17	123.588	108.35	77.136	156.254	122.955	152.752	90.082	138.582	127.048	105.904	129.913	104.042	57.792	76.7455
Abhd4	2442.27	2145.88	2521.89	2414.96	2516.61	2456.39	2666.15	2491.41	2195.8	2078.54	2267.28	2024.69	2258.15	2108.57	2299.19	2340.14
Abhd5	847.857	927.126	1042.38	946.297	778.228	903.303	984.79	1044.82	844.927	805.386	795.869	699.374	771.555	850.918	937.786	952.641
Abhd6	374.272	327.03	288.45	305.843	261.012	314.615	316.184	279.792	295.594	272.073	271.513	269.673	262.034	276.311	275.929	276.738
Abhd8	1236.67	1372.36	1412.3	872.523	921.315	948.045	913.265	1170.24	1001.82	1145.88	1173.59	1107.18	739.624	925.518	717.774	799.358
Abi1	1004	948.814	948.439	1161.21	1260.69	1162.48	1114.78	1135.37	815.199	873.79	872.013	932.797	963.382	887.279	1033.59	924.061
Abi2	701.474	542.324	596.257	616.029	795.833	552.113	688.836	615.283	568.505	623.403	598.729	499.744	708.466	612.341	623.21	616.992
Abi3	271.528	262.979	245.024	751.353	292.709	406.9	383.094	346.271	249.059	302.311	276.006	294.066	269.253	250.353	325.242	271.691
Abi3bp	986.982	979.444	970.996	759.666	1280.29	817.58	811.202	748.449	873.254	966.158	866.131	1078.47	859.745	805.061	829.643	1062.7
Abl1	2313.38	2096.96	2704.1	2285.74	2498.35	2343.72	2427.82	2460.05	1750.08	2225.69	2244.34	2136.6	2077.59	1859.91	1990.19	2134.54
Abl2	835.378	818.47	737.139	893.094	924.92	849.938	822.405	933.373	723.108	694.883	730.96	818.344	742.467	740.98	858.847	822.096
Ablim1	6865.34	8048.91	6410.21	8046.51	7912.85	8770.38	7437.92	7340.63	5458	6100.13	5997.01	5002.45	6259.21	6492.21	6782.9	7117.95
Ablim2	2075.86	1658.74	1802.69	1154.68	1080.31	1265.89	1171.59	1656.15	1798.18	2031.29	1836.59	1768.75	971.53	968.995	946.245	1037.33
Ablim3	1165.9	944.52	1526.42	1543.89	1155.78	1242.96	1240.01	969.269	934.42	1061.6	972.257	1037.42	1182.69	967.586	1172.97	1458.91
Abo	0	0	0	0	0	0	0	0	0	0	0	0	0	0	0	0
Abr	1717.03	1424.43	1491.35	1703.93	1372.39	1323.42	1227.1	1604.4	1469.67	1415.81	1169.67	1409.55	1438.22	1399.09	1160.36	1313.02
Abra	434.707	554.627	459.745	433.642	499.835	459.291	1174.3	586.622	284.02	316.208	331.017	282.382	451.971	461.128	750.168	346.65
Abracl	445.745	517.178	404.138	476.576	688.353	635.643	523.125	382.694	513.786	435.707	396.37	362.732	535.727	608.457	587.611	433.325
Abraxas1	313.011	239.903	235.723	226.533	236.114	251.913	239.254	229.294	280.013	263.355	282.292	234.81	207.395	212.869	199.055	195.457
Abraxas2	565.998	572.384	637.128	701.18	615.56	624.915	685.29	625.618	468.047	464.165	538.86	521.513	550.628	590.176	564.395	533.02
Abt1	210.261	202.786	194.824	191.462	198.681	203.708	205.019	171.943	196.972	175.812	199.953	174.011	167.87	201.502	145.97	165.427
Abtb1	520.46	336.51	445.434	376.222	383.749	437.06	385.433	337.515	364.751	364.306	380.774	343.013	360.664	276.707	354.982	365.702
Abtb2	623.1	754.674	603.334	662.224	543.582	482.659	561.665	675.243	525.402	490.307	516.756	612.572	595.528	639.344	573.488	591.681
Acaa1a	1383.29	1222.2	1367.81	1075.04	1125.46	1287.65	1245.71	1181.97	1181.47	1107.11	1175.21	1090.96	1227.78	1202.54	1066.82	1022.5
Acaa1b	9.65216	9.08495	10.8846	8.19415	3.14199	2.17539	5.66534	6.7784	9.24588	1.9622	4.71753	3.62852	4.36757	0.834015	1.14499	9.88227
Acaa2	10011.6	8496.18	9807.85	5632.63	4205.71	6213.15	6422.43	6647.36	8119.13	8675.83	8070.01	7947.19	5864.66	6039.84	5286.62	6082.89
Acaca	818.022	963.467	776.853	808.614	928.603	974.916	850.669	892.426	1247.28	744.648	698.601	785.703	707.007	717.115	711.598	875.178
Acacb	6027.77	5586.17	6573.73	4844.16	3813.18	5172.68	4979.86	4957.03	5211.76	5004.18	5212.25	4790.62	4428.83	4601.4	4041.48	4626.66
Acad10	233.405	189.481	152.643	97.2147	153.403	139.207	156.115	151.885	159.038	192.785	129.929	154.104	160.808	116.898	97.245	116.957
Acad11	3594.78	3746.01	3887.37	3370.04	1870.95	3216.4	3131.44	3628.39	3285.39	2689.56	3247.41	2665.2	2297.21	3085.1	2330.79	2307.55
Acad12	1565.78	1576.19	1594.32	1102.99	927.976	1149.38	1115.5	1004.79	1155.6	1159.06	1229.74	1174.45	1032.03	1172.44	1077.35	1013.23
Acad8	893.216	733.9	927.962	723.686	558.188	677.326	662.392	670.224	734.153	652.823	656.342	605.678	531.898	690.124	584.22	577.25
Acad9	1034.68	850.551	1045.87	793.568	660.183	745.108	803.885	866.405	838.634	933.968	894.178	919.664	765.286	759.766	769.632	745.626
Acadl	13909.1	12604.6	15547.6	10764.1	8706.77	12190.4	12759.5	12671.3	12259.5	11647.5	11862.6	10384.2	11152.6	12465.2	10698.2	10687.1
Acadm	11406.2	9335.7	11026.2	7257.33	4872.56	7424.47	6757.53	7308.92	8870.77	9039.85	8634.33	8612.93	6552.01	7791.53	6313.71	6226.61
Acads	1863.09	1750.03	2141.47	1696.95	1176.15	1550.79	1412.82	1728.1	1596.78	1397.53	1696.76	1389.77	1294.18	1469.22	1426.42	1369.5
Acadsb	3232.61	3149.4	2593.2	2850.01	2160.52	2515.8	2658.22	3193.17	2725.54	2690.26	2567	2712.8	2302.94	2385.72	2124.04	2090.63
Acadvl	9356.72	8289.04	10344.6	5916.11	4764.08	8188.9	7661.45	7961.27	8299.36	7816.51	7857.78	7162.87	6536.41	8097.43	5891.59	6363.45
Acan	2.13034	2.00414	0.987856	1.03411	10.814	5.42224	18.2171	11.4192	2.28764	15.6757	2.85646	1.80489	6.55364	0.826533	10.3982	5.97382
Acap1	62.9612	36.993	64.0452	46.4298	40.7473	27.0431	57.2814	22.7855	41.0691	34.3996	41.65	43.4909	32.6558	36.7508	45.0666	34.6424
Acap2	1170.64	1110.25	1001.96	1298.89	1352.84	1467.13	1276.84	1302.32	1011.21	1104.76	1003.3	980.715	1078.65	974.508	954.419	1128.31
Acap3	476.464	515.142	501.143	537.28	546.099	681.345	556.459	620.334	488.94	515.67	457.54	427.378	423.594	473.852	488.767	405.385
Acat1	8246.15	7509	9000.68	6428.73	4361.82	5724.69	5853.58	7332.16	6825.52	6873.61	6740.15	6694.68	5246.38	6010.6	4764.39	4643.98
Acat2	161.604	113.739	171.044	129.194	159.379	160.35	126.445	146.136	126.441	210.682	186.341	126.336	124.871	117.819	99.9356	121.859
Acat3	0	2.97741	0	4.15831	6.23393	0	0	4.59143	3.40692	3.90876	0	0.901129	0	3.3546	8.12463	0.994031
Acbd3	1132.3	1306.53	1087.51	1311.54	1180.49	1096.08	1421.23	1366.04	1079.56	1136.75	1081.6	1157.56	1249.18	1196.8	1190.15	1202.14
Acbd4	526.061	518.131	396.963	353.135	439.824	383.646	404.181	330.002	395.745	446.899	398.515	471.548	449.836	328.481	351.502	406.91
Acbd5	721.284	711.4	448.673	716.489	755.691	778.713	728.798	791.755	688.077	607.755	596.646	619.964	563.359	680.04	633.089	696.583
Acbd6	648.549	551.207	636.997	487.065	531.621	557.996	586.131	657.123	495.541	490.516	540.579	505.603	501.46	555.568	527.728	468.359
Acbd7	4.13168	0	0	1.0699	10.6188	1.06665	0	1.17825	0	0	1.92379	0	1.06978	1.63831	0	4.10532
Accs	234.419	209.743	194.845	176.662	163.736	141.235	178.457	158.768	188.157	190.41	183.813	171.652	185.181	134.931	118.726	183.903
Accsl	0	0	0	0	0	1.07466	0	0	0	0	0	0	2.16126	0	0	0
Acd	241.292	237.794	304.639	251.962	304.095	244.829	267.075	270.291	208.038	261.51	246.416	281.206	220.638	224.88	280.415	264.371
Ace	3020.46	2555.39	4033.6	5064.27	5891.89	6704.56	7638.74	7770.01	2382.44	2171.02	2394.42	2005.75	4383.78	4424.87	5833.99	3886.92
Ace2	11.4962	7.85908	10.9606	25.1567	19.2764	10.7165	15.645	38.0883	10.1488	6.75779	10.564	9.8327	16.2659	5.85447	24.5294	9.09085
Ace3	0	0	0	0	0.778683	0	0	0	0	0	0	0	0	0	0	0
Acer1	0	0	0	0	0	0	0	0	0	0	0	0	0	0	0	0
Acer2	1938.56	2235.64	1880.66	3056.81	1899.95	2309.43	1629.74	2449.68	1630.63	1922.76	2115.53	1652.37	1713.81	1266.94	1263.44	1189.17
Acer3	298.731	271.849	270.29	383.975	290.472	305.201	271.4	276.484	315.024	225.549	223.329	252.62	260.141	236.999	279.771	231.115
Ache	253.534	171.746	282.898	320.128	224.096	256.844	266.187	366.679	182.764	217.545	244.924	230.343	172.491	161.139	160.63	191.33
Acin1	2636.53	3144.86	2738.7	3086.3	3212.94	2845.91	2800.53	2765.31	2410.99	2644.77	2472.79	2791.33	2613.75	2298.2	2414.58	2782.88
Ackr1	12.7865	3.97624	8.86943	96.3776	11.709	24.864	9.56179	17.1851	18.1796	6.87566	5.69986	1.81176	7.63064	13.3693	10.4196	17.7725
Ackr2	79.5112	96.998	122.809	135.466	58.3727	221.15	187.744	189.46	125.595	68.1178	85.6075	57.8984	116.086	126.312	101.134	70.7361
Ackr3	1996.57	1968.52	1726.5	1737.85	1536.3	2087.52	2410.52	1837.84	1939.59	1774.27	1782.07	1870.38	2062.77	2136.13	1674.71	1812.08
Ackr4	134.116	188.836	279.623	132.31	297.754	317.88	309.873	319.862	91.5374	144.17	206.733	108.688	251.773	201.265	263.26	170.452
Acly	1295.4	1436.3	1379.75	1824.16	1617.86	1610.17	1484.57	1500.77	1619.95	1429.84	1243.83	1330.6	1387.69	1312.78	1416.54	1310.51
Acmsd	0	0	0	8.44697	3.79294	1.05417	1.97165	9.30566	0	1.90472	1.92264	0	6.36963	0	4.70825	4.10773
Acnat1	0	0	0	2.08341	0	0	0	0	0	0	0	0	0	0	0	0
Acnat2	0	0	0	0	0	0	0	0	0	0	0	0	0	0	0	0
Aco1	945.716	1049.27	938.962	1049.26	915.518	877.512	930.907	1130.96	835.726	816.157	753.895	861.065	830.318	940.117	762.568	879.484
Aco2	44702.9	41373.7	48533.8	38567.7	29424.2	37928.6	40346	50056	38613.6	35112.4	36375.8	33794.2	33117	42193.9	34103.4	32880.3
Acod1	0	0.977328	32.7982	258.351	0.770011	2.12923	0.980135	6.94708	0	0	1.90493	0	0	0	1.16613	2.01037
Acot1	120.279	133.851	89.6777	65.1651	38.9812	35.56	61.1906	80.6632	133.684	111.229	147.638	93.3166	59.4839	26.4301	28.8502	49.9279
Acot10	2.09202	2.93322	7.02772	1.05206	3.07592	2.13592	8.78889	4.61724	2.25082	0.960582	3.84838	0	6.54344	5.03058	1.15909	3.014
Acot11	784.165	670.431	852.961	601.699	767.16	889.863	865.875	1032.84	634.867	761.847	657.216	535.402	592.29	676.017	663.202	639.069
Acot12	2.08774	5.89816	0	0	1.54665	2.14849	0	1.17681	1.11266	0.959646	0	0	0	1.65771	5.89635	2.05342
Acot13	3560.09	3543.9	3688.43	2531.58	2471.48	3116.58	2940.82	3211.75	3222.78	2956.12	2984	2775.12	2598.53	2839.21	2518.64	2473.88
Acot2	642.274	466.362	723.523	526.502	356.282	422.173	481.57	491.768	834.44	717.663	673.824	522.287	423.344	475.252	346.263	448.137
Acot3	0	0	1.94922	1.05532	0	2.12163	1.96366	0	0	0	0.95638	0	0	0	0	0
Acot4	1.04633	0.982568	4.01851	6.31537	1.54114	2.13263	0	5.77957	6.72743	2.87941	4.84005	3.65103	0	4.1122	0	1.01746
Acot5	0	0	0	3.12511	0	0	0	0	0	0	0	1.80595	0	0	0	0
Acot6	46.2485	52.3357	73.3501	79.0541	33.6798	62.9272	43.5613	39.481	53.202	53.8153	55.122	52.8287	48.0402	23.2435	45.7494	49.2377
Acot7	1201.33	991.697	1059.2	695.963	633.548	797.852	828.025	737.126	1000.91	1046.96	1126.08	886.754	707.575	726.573	681.407	602.307
Acot8	122.225	125.574	101.211	117.883	119.326	112.156	130.259	161.928	86.9637	132.89	91.3326	117.757	84.4476	125.73	97.6131	118.28
Acot9	469.405	487.319	510.38	594.566	724.891	654.033	617.435	504.312	524.857	408.992	440.781	377.399	608.383	602.823	613.745	614.848
Acox1	5232.76	5434.34	5444.95	4512.25	4080.02	5287.2	5115.86	5451.98	4425.19	3968.67	4358.67	3894.22	4453.25	4685.28	4340.79	4405.91
Acox2	1.07797	0	8.00192	6.99329	3.96089	5.18766	2.93205	1.16498	0	1.95131	0	0	0	3.32927	0	0
Acox3	1120.15	1012.58	1091.32	992.317	907.115	1174.1	1064.8	1086.35	873.81	779.917	916.562	769.415	875.749	942.595	889.517	831.314
Acoxl	0	6.94398	0	0	0	0	0	0	1.13463	0	0	0.899576	0	0	0	0
Acp1	963.167	796.259	822.345	720.016	801.256	777.847	752.401	846.454	754.956	742.494	831.32	696.918	659.313	647.954	658.837	632.765
Acp2	1287.34	1234.77	1331.49	1555.79	1239.06	1220.82	1263.9	1318.21	1116.31	1067.9	1154.95	1074.16	1106.71	1139.87	1078.38	1083.19
Acp4	0	0	0	0	0	0	0	0	0	0	0	0	0	0	0	0
Acp5	56.9794	60.4462	59.5538	213.545	117.124	90.0867	74.917	78.9384	75.0275	72.1139	83.0583	53.8246	57.4038	63.0561	85.8437	68.7133
Acp6	590.157	622.192	683.473	610.934	643.437	589.511	665.893	549.176	560.079	546.755	571.055	552.456	557.356	608.828	542.402	570.628
Acp7	0	0	0	0	0	0	0	0	0	0	0	0	0	0	0	0
Acpp	4.03316	9.47402	1.91837	24.0272	7.04525	13.4208	8.48464	8.90331	7.87682	0.966169	6.72795	9.86047	2.16643	8.36038	2.33825	5.04166
Acr	11.2001	5.26091	6.64716	6.55538	18.7149	11.8093	18.2114	8.77871	13.3583	12.6753	17.6011	15.8826	5.31258	4.48907	13.5222	10.6978
Acrbp	60.9657	60.3595	79.869	74.8712	94.9505	88.1395	79.7959	54.8604	68.7787	69.4249	70.2946	61.7492	66.5395	50.8594	51.4219	82.0091
Acrv1	0	0	0	0	0	0	0	0	0	0	0	0	0	0	0	0
Acsbg1	25.5831	16.0245	24.6598	18.556	7.83432	8.66239	6.67818	17.0732	17.1595	5.88213	11.3669	18.0759	7.62844	15.0528	23.059	7.92992
Acsbg2	0	0	0	1.0417	0	0	0	0	0	0	1.90381	0.907221	0	0	0	0
Acsf2	567.045	495.783	718.306	527.905	496.126	606.336	549.145	338.176	522.682	510.038	512.862	471.484	523.797	402.615	465.167	485.679
Acsf3	548.547	419.194	655.951	515.992	388.209	459.126	496.101	531.034	519.886	453.254	439.606	452.378	402.884	440.138	380.451	408.193
Acsl1	13537.3	10699.8	12695	7686.08	5724.28	9430.76	10005	9254.16	12443.2	11742.3	11333.2	9519.21	7687.67	9088.17	6645.77	8222.93
Acsl3	113.125	137.136	130.313	175.247	151.071	132.381	125.622	114.385	113.709	113.182	146.3	106.931	131.03	162.579	111.769	114.33
Acsl4	590.657	660.581	542.182	797.08	894.235	769.99	788.105	642.108	641.09	660.277	528.296	704.391	672.029	673.196	685.165	683.164
Acsl5	759.845	1077.3	878.909	1431.18	1091.33	1223.96	951.553	835.085	724.75	739.538	769.704	748.915	877.125	719.824	847.262	830.81
Acsl6	516.1	434.284	544.651	424.506	154.246	440.957	252.313	377.031	419.435	403.245	367.392	439.24	218.002	356.575	186.82	199.697
Acsm1	0	0	0	0	0	0	0	0	0	0	0	0	0	0	0	0
Acsm2	0	0	0	0	0	0	0	0	0	0	0	0	0	0	0	0
Acsm3	11.1595	22.5424	3.04216	4.27971	7.50431	4.3653	6.71052	20.0717	27.1814	18.3832	7.78987	24.1238	15.274	10.9642	0	18.2967
Acsm4	0	0	0	0	0.778683	0	0	0	0	0	0	0	0	0	0	0
Acsm5	24.3465	42.5971	37.4543	10.3973	1.5575	15.0783	3.86244	12.6388	5.65111	18.5804	9.54039	12.6373	7.59985	9.19203	3.49055	2.98584
Acss1	6510.45	6787.01	6899.75	6792.94	3664.28	5097.11	6787.05	8069.47	6024.79	5570.46	5748.83	5096.26	5342.09	6197.52	5168.36	4772.39
Acss2	1051.5	913.462	1051.53	799.07	689.558	975.328	1043.34	1062.38	1055.98	848.33	895.139	738.83	893.804	958.892	799.322	851.317
Acss2os	0	0	0	0	0	0	0	0	0	0	0	0	0	0	0	0
Acss3	106.746	58.2987	83.0238	66.8743	49.7551	51.617	59.1392	79.7136	78.6711	105.516	113.231	98.8842	64.1771	38.7286	76.7544	48.0234
Acta1	34.2125	4.01487	187.769	27.8018	466.598	787.29	498.195	53.4242	5.74725	0	3.78279	0.907094	339.482	622.724	1668.58	520.043
Acta2	807.696	851.634	970.63	661.834	1722.83	1200.93	1220.05	1162.92	1024.93	621.017	722.054	726.674	948.704	994.907	1082.41	1068.71
Actb	8327.82	11209.8	11295.1	20631.6	12157	11308.4	12056.4	12279.2	8306.11	8480.57	10048.9	8938.49	9052.61	9303.57	11277.1	8802.11
Actbl2	0	0	0	4.16681	0	0	0	0	0	0	0	0	0	0	0	0
Actc1	135096	125289	158563	161907	163765	179485	229473	200416	167683	122406	124762	105302	167574	212008	190751	173858
Actg1	7844.98	10751.7	9907.64	14259.2	11817.6	9640.49	11610.8	12077.5	7876.12	8367.18	9715.29	8656.4	8405.66	9126.41	12230.1	8019.13
Actg2	7.45175	4.9836	5.92149	2.06918	18.7456	1.08305	8.58441	3.4319	13.6684	1.96037	2.85093	9.94118	2.18294	9.20621	6.92332	17.8096
Actl10	0	0	0	0	0	0	0	0	1.13036	0	0	0	0	0	0	0
Actl11	0	0	0.988059	0	0	0	0	0	0	0	0	0	0	0	0	0
Actl6a	404.045	445.369	454.49	417.267	440.48	416.418	366.039	456.599	459.042	325.487	364.514	333.098	352.266	446.182	348.835	301.93
Actl6b	0	0	0	0	0	0	0	0	0	0	0	0	0	0	0	0
Actl7a	0	0	0	0	0	0	0	0	0	0	0	0	0	0	0	0
Actl7b	0	0	0.996634	0	0	0	0	1.13701	0	0	0	0	0	0	0	0
Actl9	0	0	0.989	0	0	0	0	4.58316	1.13812	0	1.89667	0	0	0.835283	0	0
Actn1	921.899	1239.83	1052.97	1763.55	2779.1	1635.73	1911.41	1785.64	936.17	820.845	824.583	846.821	1320.3	1376.65	2024.64	1553.47
Actn2	41298.3	37323.7	42175.8	32994.8	44545.2	41226.9	58655.8	42534.4	36703.5	33068.5	32794.2	33010.7	46734.7	52637.6	47595.4	47735.3
Actn3	64.0149	72.0403	60.1146	33.0085	56.4238	55.1671	57.2764	37.5794	41.1091	53.0386	66.2714	84.2102	68.5954	73.5301	47.3364	40.5968
Actn4	4061.33	5057.01	4533.19	5726.97	7300.27	6029.51	6745.84	6190.74	4181.62	3989.09	3622.25	3952.67	5695.93	5389.7	6741.96	5537.48
Actr10	1120.47	1192.89	1148.04	1015.39	1053.76	1112.79	1060.66	1119.55	1083.15	1088.99	1009.86	968.565	987.839	1066.92	1028.95	1021.21
Actr1a	2723.89	2964.87	2992.79	2744.63	2807.5	3119	3068.99	3138.64	2361.35	2244.48	2328.19	2319.49	2668.07	2643.39	2624.52	2629.82
Actr1b	1681.69	1675.78	1849.78	1842.38	1886.95	1952.07	2251.41	2087.79	1550.94	1610.17	1538.41	1614.89	1838.14	1853.58	1971.79	1704.35
Actr2	1801.33	2090.73	1877.68	2752.29	2155	2270.04	2231.43	2173.53	1760.69	1657.61	1512.34	1659.73	1829.76	1951.65	1919.58	1608.71
Actr3	2452.66	2679.12	2765.81	3993.56	3340.74	3082.47	3349.75	2933.96	2362.21	2205.1	2117.12	2283.84	2664.33	2544.57	2914.36	2613.31
Actr3b	481.37	457.699	531.519	336.887	218.111	412.741	325.442	317.135	355.526	361.164	364.503	293.683	259.629	290.731	236.588	201.788
Actr5	168.598	106.023	125.736	133.197	121.03	137.911	122.914	107.035	108.709	139.545	110.39	138.439	122.087	116.39	116.821	79.91
Actr6	198.495	169.126	236.216	186.351	167.596	156.673	194.794	112.328	136.344	132.089	161.045	141.248	163.568	203.189	148.942	202.842
Actr8	691.619	653.595	848.961	634.747	659.961	626.96	680.211	674.999	599.288	673.952	650.983	586.346	588.233	570.229	587.105	684.338
Actrt1	0	0	0	0	0	0	0	0	0	0	0	0	0	0	0	0
Actrt2	0	0	0	0	0	0	0	0	0	0	0	0	0	0	0	0
Actrt3	5.27907	0.991353	3.96562	3.11801	4.66067	0	0	0	2.26667	1.93912	1.90486	0	1.08695	0	0	0
Acvr1	796.274	859.925	891.958	848.532	922.871	1052.52	892.76	813.746	731.824	750.64	698.11	768.387	870.14	826.516	783.521	802.514
Acvr1b	704.461	657.105	660.909	643.87	678.897	598.153	587.953	538.899	556.288	661.786	599.447	588.29	585.821	584.008	511.75	592.712
Acvr1c	13.1079	11.4757	2.06949	0	7.56949	1.99799	6.28361	12.1491	46.8583	22.8416	3.8177	18.3851	4.26662	8.33594	3.7249	21.8767
Acvr2a	484.329	604.653	346.335	476.601	550.566	468.156	601.065	507.135	498.44	514.421	452.089	526.794	431.463	606.507	570.437	552.829
[truncated: 22,974 more rows]
