# Supplementary material for: A murine model of hypertensive heart disease in older women
Source: PeerJ. 2024 May 23;12:e17434. doi: 10.7717/peerj.17434 (PMC11128216; doi:10.7717/peerj.17434)
Supplement: Supplemental Information 4 [file peerj-12-17434-s004.xlsx]

## Sheet: OldM_vs_OldMG.genes.deseq.count
	Males Controls 24-month-old				Males Gonadectomised 24-month-old				Females Controls 24-month-old				Females Gonadectomised 24-month-old				Females Controls 24-month-old Angiotensin II				Females Gonadectomised 24-month-old Angiotensin II
	Sample31	Sample32	Sample33	Sample49	Sample34	Sample35	Sample36	Sample50	Sample37	Sample38	Sample39	Sample51	Sample43	Sample44	Sample45	Sample53	Sample40	Sample41	Sample42	Sample52	Sample46	Sample47	Sample48	Sample54
0610005C13Rik	1.95388	6.32996	4.54566	0	7.22036	10.8629	6.70721	5.80721	2.44961	2.30027	1.42858	9.95579	10.1357	7.41003	1.15632	7.03026	0	2.81357	0	1.56722	8.61404	5.07917	0.815141	3.01961
0610009B22Rik	281.652	310.499	351.443	291.571	349.27	344.996	277.027	350.953	299.867	365.796	376.641	326.73	313.107	385.445	349.722	286.028	216.253	249.43	240.842	280.348	344.529	334.415	324.289	340.077
0610009E02Rik	14.9394	12.5922	20.7246	15.9017	21.52	19.7532	9.41225	10.0821	30.4427	10.5353	19.9042	41.489	7.6486	21.0339	7.26876	18.0028	22.0064	5.5331	19.3567	12.6563	20.0241	14.9117	6.74536	12.2426
0610009L18Rik	80.54	133.62	118.962	145.967	118.809	120.375	81.5683	120.245	99.2781	136.934	105.367	120.716	66.7669	123.294	91.688	118.164	122.034	117.78	121.305	101.904	130.512	118.943	100.357	115.338
0610010B08Rik	132.434	45.6799	0	41.7006	0	184.67	0	0	87.3511	0	106.5	0	52.5891	8.25112	0	76.9661	68.7291	110.343	0	10.6122	68.3158	0	0	68.751
0610010F05Rik	339.761	280.11	169.098	236.153	227.792	193.967	291.268	205.218	313.4	323.221	313.464	284.311	310.247	220.348	263.255	276.426	198.529	286.944	282.108	284.217	245.663	251.883	299.107	278.575
0610010K14Rik	345.732	250.204	337.839	291.794	323.421	307.731	402.613	376.688	399.051	419.454	384.168	415.806	315.89	395.114	400.751	426.125	341.676	330.303	289.66	344.419	348.548	327.659	334.729	396.332
0610012G03Rik	1022.87	1199.78	1171.83	964.57	1119.46	1237.2	1150.57	1143.62	1292.68	1296.9	1277.49	1475.63	1158.2	1256.73	1246.85	1213.8	937.616	1003.63	1106.33	1027.12	1180.99	1082.18	1111.35	1173.35
0610030E20Rik	458.321	440.022	399.347	432.962	401.745	475.541	531.998	454.804	533.556	586.744	622.119	557.339	547.367	557.016	547.426	528.215	543.835	523.277	441.505	476.739	541.802	497.199	505.746	450.973
0610031O16Rik	0	0	0	0	0	0	0	0	0	0	1.25087	0	0	0	0	0	0	0	0	0.809319	0	0	0	0
0610037L13Rik	429.58	440.974	457.799	545.138	499.738	495.032	523.004	508.016	563.551	692.052	488.744	618.842	469.963	582.177	511.848	548.811	489.345	448.444	487.318	482.817	635.76	512.812	500.614	565.257
0610038B21Rik	13.3544	10.4761	9.44978	3.7903	6.38341	11.2789	6.15058	8.87546	23.3917	11.6039	20.2411	9.40214	10.9004	9.05633	6.78238	11.0226	8.7963	5.89424	9.65981	8.90697	4.70541	2.70815	8.32646	8.00503
0610039H22Rik	0	0	0	0	0	1.2622	0	0	0	0	0	0	0	0	0	0	0	0	0	0	0	0	0	0.883552
0610039K10Rik	0	0	0.957749	3.81881	0	0	0	0	0	2.47613	0	2.36714	4.74041	3.44171	0.979231	2.82453	0	0	0	0.81078	0	0	1.83353	3.53574
0610040B10Rik	50.2267	31.469	44.5531	41.7478	44.502	30.4976	51.1875	62.8214	46.2096	54.0887	59.4232	52.3891	36.1297	42.9433	35.3051	55.2538	53.9213	43.8072	38.3872	43.9644	57.3746	47.186	73.763	52.0826
0610040F04Rik	0	0	0	0	0	1.26037	0	0.747394	4.02842	1.91087	1.21949	2.43231	0	2.31027	0.983495	0	0	1.92359	2.84784	1.62818	0.897596	0	0	5.42017
0610040J01Rik	118.602	124.907	191.339	170.866	156.628	151.75	158.903	185.778	137.364	148.752	224.168	173.655	118.735	193.738	164.274	153.521	126.497	95.3264	115.485	95.606	103.991	113.138	120.997	101.456
0610043K17Rik	1.03178	1.86062	0	12.7564	2.10476	0	3.49255	1.58052	1.344	4.42351	4.02742	0	1.56354	0	1.07969	0	0	3.86676	0.985846	2.46017	1.98195	0.862964	0	0
1010001N08Rik	173.252	227.493	139.903	142.083	161.558	222.336	163.534	140.583	191.812	156.469	216.53	192.069	245.752	131.233	199.535	186.763	100.882	214.153	144.768	147.568	139.151	117.19	148.772	178.887
1110002J07Rik	0	1.07979	3.35958	1.53704	0	0	0.914471	2.42184	0	0	0	2.94517	7.37999	3.96624	1.19111	2.33682	7.27963	2.39847	2.18035	0.673836	0	2.12937	5.01378	2.90739
1110002L01Rik	264.392	288.026	243.444	314.644	272.326	287.057	237.868	347.901	366.863	379.665	320.182	364.133	327.925	309.662	333.46	285.582	273.932	317.888	243.358	273.698	324.693	320.829	265.758	284.342
1110004F10Rik	967.244	988.148	1009.72	1041.53	984.22	1015.27	1115.11	1155.37	1333.48	1291.18	1233.37	1179.09	1052.84	1320.38	1158.43	1260.41	1071.41	1018.39	1039.04	1058.3	1057.69	996.442	1042.24	1030.25
1110006O24Rik	6.15749	7.61726	0.946399	5.76769	11.668	8.74221	7.03667	10.4278	9.1103	7.91172	3.58891	9.45208	1.54811	5.68708	9.71272	16.655	8.72546	0.983324	9.65756	1.63121	14.1625	10.8333	3.73313	13.4129
1110008L16Rik	231.661	239.193	217.625	242.443	260.281	197.794	238.94	236.23	289.757	260.589	292.351	262.326	208.105	271.692	248.826	247.247	163.398	208.293	203.563	191.355	248.277	247.975	255.945	235.254
1110008P14Rik	276.303	411.342	372.508	407.08	381.093	287.098	387.607	416.248	513.031	442.719	395.502	520.778	409.836	433.938	400.256	429.48	540.066	426.187	582.241	495.767	489.167	496.585	467.163	483.279
1110012L19Rik	176.948	179.469	154.717	177.83	194.492	232.876	213.308	235.045	273.745	238.811	270.965	223.149	240.311	295.47	266.374	234.765	200.132	186.574	206.036	170.343	194.523	190.056	196.238	151.237
1110015O18Rik	0	0	0	0	0	0	0	0	0	0	0	0	0	0	0	0	0	0	0	0	0	0	0	0
1110017D15Rik	1.53884	0	0	0	0	0	1.73544	0	0.984659	1.01639	2.78103	1.30029	0	0	1.33777	0	0	0.989263	0	0.928716	2.01142	0	0	1.55044
1110019D14Rik	68.0966	69.8929	59.5909	85.1224	69.4939	65.2221	64.6918	80.3376	69.4519	105.171	75.5826	112.126	82.5282	78.9443	94.7481	100.656	99.5262	88.9323	96.3574	56.4947	134.839	105.799	108.217	100.171
1110020A21Rik	22.3637	14.9039	18.3682	19.4731	10.6341	21.5724	12.0701	18.8298	16.0061	26.4398	24.7384	23.0759	15.73	6.87979	11.9557	20.5735	21.5625	21.211	9.59338	20.4096	13.3204	18.3007	15.3753	13.1335
1110025L11Rik	0	0	0	0	0	0	0	0	0	0	0	0	0	0	0	0	0	0	0	0	0	0	0	0
1110028F11Rik	0	0	0	0	0	0	0	0	0	0	0	0	0	0	0	0	0	0	0	0	0	0	0	0
1110028F18Rik	0	0	0	0	0	0	0	0	0	0	0	0	0	0	0	0	0	0	0	0	0	0	0	0
1110032A03Rik	253.444	269.104	299.004	327.913	376.236	353.782	289.256	343.621	355.87	407.3	409.262	368.551	377.167	365.571	371.784	354.858	239.827	266.413	296.112	252.072	277.973	240.727	254.385	256.024
1110032F04Rik	0	0.941369	1.97312	0.882723	8.29219	3.89951	6.13224	6.17522	1.33796	6.20538	15.7885	6.02296	12.2562	9.17716	7.38582	3.94206	0	3.98117	5.95849	0	6.83795	0	0	0
1110036E04Rik	0	0	0	0	4.27225	0	0	0	0	0	0	0	0	0	0	0	0	0	0	0	0	0	0	0
1110038B12Rik	26.7892	36.0115	20.0892	48.576	43.0678	27.2134	39.1368	31.8108	57.2267	50.5457	42.5076	54.6473	28.0896	37.7548	54.7693	65.9831	33.5224	47.9814	71.2878	48.1863	31.0064	45.7525	28.5209	60.3331
1110038F14Rik	226.574	324.727	240.538	269.806	280.655	300.523	281.552	273.915	295.77	319.987	295.796	377.978	297.806	303.963	294.133	351.905	219.542	263.878	270.799	244.589	307.528	287	295.314	255.919
1110046J04Rik	15.64	7.57743	14.8603	16.2736	16.0204	29.0922	22.4332	9.73905	19.8786	13.9832	21.8966	18.2744	4.76414	17.2087	35.7381	11.7642	2.17603	23.9018	29.791	24.5601	14.4014	20.2515	17.3352	19.5061
1110051M20Rik	183.135	219.408	179.872	228.366	206.668	231.936	243.16	243.091	289.365	303.786	290.967	249.635	323.935	270.6	287.504	260.184	247.667	198.364	225.741	218.357	247.896	243.677	232.529	232.206
1110058D11Rik	0	1.87387	0.965302	0.950416	0	0	0	0.753302	0	0	0	0	0	0	0	0	0	0	0	0	0	0	0.913531	0
1110059E24Rik	208.132	167.781	205.114	173.207	209.279	176.838	210.834	196.587	254.926	272.595	267.683	262.46	231.696	238.496	255.38	260.085	185.144	194.655	211.78	188.334	241.286	214.663	229.899	181.404
1110059G10Rik	173.41	192.586	196.919	238.405	222.691	209.004	202.826	184.088	235.882	280.31	215.342	257.024	174.545	217.943	203.51	213.648	229.699	236.721	197.507	242.976	179.917	218.292	184.383	215.362
1110065P20Rik	105.178	159.331	170.569	178.676	135.099	186.367	200.698	211.66	221.376	193.912	213.023	206.681	185.652	182.039	147.359	200.046	156.179	157.873	162.35	179.971	145.9	173.029	156.107	176.354
1190002N15Rik	968.831	682.442	782.952	961.224	955.868	793.874	814.212	788.534	995.985	1050.81	842.054	992.351	1050.28	888.854	922.478	695.975	855.925	969.657	762.011	893.933	1033.55	1184.63	1304.91	1014.56
1190005I06Rik	29.7209	0	26.2236	42.7065	27.545	50.1002	10.5863	29.6809	19.5554	17.6656	55.6146	40.6934	12.4721	40.9781	39.6874	37.6844	8.88857	35.4319	20.4027	17.1162	47.5015	12.686	13.8395	48.5423
1190007I07Rik	149.588	226.439	178.616	203.334	254.341	217.604	162.643	217.148	301.155	246.87	272.101	299.974	251.194	240.21	167.95	241.973	175.987	149.292	189.372	204.974	264.24	205.945	183.491	250.044
1190028D05Rik	0	0	0	2.79818	0	0	0	0	0	0	0	0	0	0	0	0	0	0	0	0	0	0	0	0
1300002E11Rik	166.173	98.3589	156.937	167.297	185.966	156.986	191.984	135.242	162.748	167.9	191.929	175.359	188.716	189.445	166.212	166.684	109.211	195.146	147.502	139.019	152.001	154.56	123.114	144.359
1300017J02Rik	0	0	1.9238	2.8303	0	0	0	1.49059	4.0805	0	1.24031	0	1.58982	2.3214	0	0.965857	4.36186	1.94113	4.75998	0.810768	0.959805	3.60232	1.83029	0.885283
1500004A13Rik	6.20126	11.551	6.79484	14.1135	6.42029	23.9708	15.4834	14.9489	14.9673	20.9632	25.9513	9.72931	15.8955	18.5606	12.8396	18.4992	17.3777	19.3516	23.6432	19.4404	17.2848	28.8143	20.0676	12.3186
1500009C09Rik	0	0	0	0	0	0	0	0	0	0	0	0	0	1.16035	0	0	0	0.97314	0	0	0	0	0.917898	0.879725
1500009L16Rik	59.4874	73.4037	52.3126	68.4914	60.5244	104.346	79.6921	44.1677	58.6908	52.1458	43.6475	72.4918	52.8614	44.1106	80.4426	115.513	83.9827	69.6795	73.7374	87.0945	90.4878	122.357	130.904	125.537
1500011B03Rik	26.7159	37.514	56.1542	50.7205	43.5586	61.5524	35.0659	48.3675	26.62	44.7756	64.9187	54.378	26.7714	76.0361	58.4146	68.9998	38.3107	28.1504	47.6131	28.3131	23.1998	36.3167	34.2466	36.0204
1500011K16Rik	364.335	433.866	448.177	367.921	396.651	449.778	366.921	489.032	573.243	538.107	459.912	593.698	449.208	460.342	511.144	502.498	414.679	486.372	463.961	406.721	517.932	367.99	433.877	442.385
1500012K07Rik	0	0.964641	0	0	0	0	0	0	0	0	0	0	0	0	0	0	8.7104	0	0	0	3.84795	0	0	0
1500015A07Rik	37.1832	44.7673	45.7355	36.6172	43.3813	32.1129	25.8918	33.3481	24.6238	49.3039	42.134	50.2454	44.3128	39.4598	35.8811	17.1055	34.3473	31.854	30.8279	36.7334	39.8368	53.8026	35.5826	19.492
1500015L24Rik	0	0	0	0	0	0	0	0	0	0	0	0	0	0	0	0	0	0	0	0	0	0	0	0
1500015O10Rik	1.03057	0	4.78041	7.59632	6.35568	8.79892	6.08826	2.2383	2.6393	11.8259	3.6188	3.57186	11.0031	10.3156	1.96421	3.80286	13.1598	41.7809	25.052	33.5288	33.4829	6.28252	13.7716	19.6114
1500026H17Rik	16.6429	22.0023	23.1002	14.8047	26.7435	25.6234	22.311	37.3552	12.4537	30.4234	17.6817	22.2671	19.3196	31.4617	19.2411	20.2069	6.52902	15.193	7.60694	19.4263	18.3635	24.5172	9.90786	12.2846
1600002D24Rik	0	0	0	0	0	0	0	0	0	1.25912	0	2.41711	0	0	0	0	0	0	0	0	0	0	0	0
1600002K03Rik	48.5521	77.3517	45.1973	50.8037	50.6954	63.0482	57.5019	66.9765	61.0795	72.7371	67.7336	74.9056	51.5331	67.187	86.8613	52.2248	80.6429	53.5799	54.4737	84.5973	91.6177	97.9331	72.0968	77.147
1600010M07Rik	2.08339	1.883	9.88299	1.92673	1.06157	10.1185	6.05064	3.01702	1.30761	3.1404	10.985	3.64424	1.57185	3.42579	4.98544	5.85185	2.15647	1.92427	8.71625	0.822578	1.91617	4.3909	6.44615	4.45853
1600012H06Rik	329.6	275.27	270.457	325.679	372.437	280.512	323.019	348.51	451.788	426.331	437.569	418.557	369.831	384.824	397.257	346.167	372.779	389.47	376.096	362.925	346.645	344.572	375.434	367.281
1600014C10Rik	937.461	1048.82	1144.43	898.621	1117.79	896.255	1175.45	1102.22	1212.5	1368.22	1207.88	1153.27	1079.17	1338.84	1180.35	1148.62	1033.33	1021.9	938.735	959.969	1086.56	1124.66	1020.36	1052.43
1600014C23Rik	0	0.937552	2.8991	2.89312	1.05616	2.52379	0.876823	0	1.28524	3.07012	6.01485	10.6842	0	3.38545	1.97056	0.942711	0	2.92285	2.93953	13.1992	4.75289	2.65153	3.71341	9.89752
1600015I10Rik	0	4.77826	1.91846	0.945188	6.41222	6.28641	0.860366	0.747308	2.69462	4.44287	2.45062	0	1.58551	6.94201	13.7725	2.90566	2.17337	0.967791	6.63802	8.14701	7.67723	4.50932	6.39197	4.40358
1600019K03Rik	0	0	0	0	0	0	0	0	0	0	0	0	0	0	0	0	0	0	0	0	0	0	0	0
1600020E01Rik	38.5237	36.6755	53.7835	35.5751	38.8644	23.1311	29.9734	51.2091	47.6637	56.2185	47.8065	56.5677	42.8293	26.3801	51.1342	43.3273	28.336	25.9989	59.4227	37.3125	39.3722	38.2738	28.4958	41.0494
1600023N17Rik	1.03283	0	0.971456	0.943235	1.06704	0	0	0.742839	2.68449	0	3.64202	0	0	1.1507	0	0	0	0	0.962635	0	0	2.69825	0	0
1600025M17Rik	0	0	0	0	0	0	0	0	0	0	0	0	0	0	0	0	0	0	0	0	0	0	0	0
1600027J07Rik	0	0	0	0	0	0	0	0	0	0	0	0	0	0	0	0	0	0	0	0	0	0	0	0
1600029I14Rik	0	0	0	0	0	0	0	0	0	0	0	0	0	0	0	0	0	0	0	0.807594	0	0	0	0
1600029O15Rik	1.02801	0	2.92732	0.924837	0	3.81383	3.43958	0	1.36217	1.913	0	1.22401	1.57442	11.5839	3.01626	5.92821	0	1.93787	2.86283	2.44292	2.90536	2.68045	0.915739	0
1700001C02Rik	0	0	0	3.73091	0	0	0	0	0	0	0	0	0	0	0	0	0	0	0	0	0	0	0	0
1700001C19Rik	0	0	1.92704	0	0	0	1.72301	0	0	0	0	0	0	0	0	0	0	0	0	0.807594	2.87643	0	0	0.886483
1700001D01Rik	0	0	0	0	0	0	0	0	0	0	0	0	0	0	0	0	0	0	0	0	0	0	0	0
1700001F09Rik	0	0	0	0	0	0	0	0	0	0	0	0	0	0	0	0	0	0	0	0	0	0	0	0
1700001G01Rik	0	0	0	0	0	0	0	0	0	0.633634	0	0	0	0	0	0	0	0	0	0	0	0	0	0
1700001G11Rik	2.07472	0.950172	0.96533	1.91863	0	2.51807	1.73592	0.749427	5.25396	5.0001	6.06509	6.00109	4.70792	4.57701	1.97613	0	0	0	0.965293	4.10189	0.958829	2.68183	2.76266	0
1700001G17Rik	1.02525	0	0.945661	1.89325	2.11791	2.51074	5.23187	0	6.57663	1.85454	0	1.18396	0	2.28881	0	2.82001	0	0	0	1.64366	5.72798	2.70591	0.922367	4.47784
1700001J03Rik	2.07172	0	0	1.91909	4.22889	2.51165	2.58245	3.00091	2.63135	3.14452	0	2.42665	1.5699	1.14645	1.98901	1.94432	12.8935	0	3.83746	0.820632	4.79676	3.56027	0	3.55471
1700001J11Rik	0	0.961624	2.96104	0	0	1.26686	0.860256	0	0	0	2.4716	0	0	0	0	0	0	0	0	0	0	0.905645	0	0
1700001K19Rik	0	0	0	0	0	0	0	0	0	0	0	0	0	0	0	0	0	0	0	0	0	0	0	0
1700001K23Rik	0	0	0	0	0	0	0	0	0	0	0	0	0	0	0	0	0	0	0	0	0	0	0	0
1700001L05Rik	13.4992	12.5068	21.6483	5.6126	13.939	12.6895	12.0258	19.3714	8.22802	8.35126	27.2769	8.5664	11.2294	6.97729	20.8823	14.8144	10.9283	16.2739	13.2508	7.2836	12.5283	9.79894	13.5629	14.923
1700001L19Rik	0	0	0.963521	0	0	0	0	0	0	0	0	3.6579	0	0	0	0	0	0	0.951219	0	0	0	0	0
1700001O22Rik	3.4735	0	1.02573	3.84094	4.71271	5.57134	2.88966	2.91271	5.05619	1.99324	2.60218	10.2144	0	0.928155	5.50279	3.22047	0	2.49601	0	4.10597	4.41354	6.26002	3.78386	2.07042
1700001P01Rik	0	0	1.96276	0	0	0	0	0	0	1.86049	0	3.62476	0	0	0	3.82927	0	0	0	0	0	0	2.75629	0
1700003C15Rik	0	0	0	0	0	0	0	0	0	0	0	0	0	0	0	0	0	0	0	0	0	0	0	0
1700003D09Rik	0	0	0	0	0	0	0	0	0	0	0	0	0	0	0	0	0	0	0	0	0	0	0	0
1700003E16Rik	5.16726	2.90629	0.943482	4.76006	5.32858	7.51572	8.75108	6.66787	9.30364	10.467	27.4474	7.03465	15.7231	3.44499	22.2094	8.33161	4.44544	3.92731	8.62681	5.67331	1.90347	7.31904	0	6.24616
1700003E24Rik	0	0	0	0	0	0	0	0	0	0.633634	0	0	0	0	0	0	0	0	0	0	0	0	0	0
1700003F12Rik	1.01146	0.941866	0	0	0	0	4.4691	0	0	1.75242	1.1464	0	0	0	0.949126	0.877137	0	0.989165	4.86811	1.61899	0.936115	0	0	0.906758
1700003G13Rik	0	0	0	0	0	0	0	0	0	0	0	0	0	0	0	0	0	0	0	0	0	0	0	0
1700003G18Rik	0	0	0	0	0	0	0	0	0	0	0	0	0	0	0	0	0	0	0	0	0	0	0.913531	0
1700003H04Rik	0	0	0	0	0	0	0	0	0	0	0	0	0	0	0	0	0	0	0	0	0	0	0	0
1700003I22Rik	0	0	0	0	0	0	0	0	0	0	0	0	0	0	0	0	0	0	0	0	0	0	0	0
1700003L19Rik	0	0	0	0	0	0	0	0	0	0	0	0	0	0	0	0	0	0	0	0	0	0	0	0
1700003M07Rik	1.03407	0	1.94422	0	0	0	3.44424	0.746831	0	0.637013	3.68067	0	1.59105	1.15741	12.7979	0.971543	0	0.96835	0	0	0.956284	0	6.38856	1.75926
1700003P14Rik	0	0	0	0	0	0	0	0	0	0	0	0	0	0	0	0	0	0	0	0	0	0	0	0
1700006A11Rik	0	0	0	0	0	0	0	0	0	0	0	0	0	0	0	0	0	0	0	0	0	0	0	0
1700006F04Rik	0	0	0	0	0	0	0	0	0	0	0	0	0	0	0	0	0	0	0	0	0	0	0	0
1700006H21Rik	0	0	0	0	0	0	0	0	0	0	0	0	0	0	0	0	0	0	0	0	0	0	0	0
1700007F19Rik	0	0	0	0	0	0	0	0	0	0	0	0	0	0	0	0	0	0	0	0	0	0	0	0
1700007J10Rik	0	2.89392	0	0	0	0	0	0	0	0	0	0	0	1.16035	0	0	0	0	0	0	0	1.80216	0	0
1700007K13Rik	0	2.87105	0	0	0	0	0.873702	0	0	2.47862	0	0	0	0	0	0.950449	2.17624	2.90092	1.91043	5.68077	0.960554	1.80222	0	0
1700007L15Rik	35.2492	27.5459	36.9464	41.0983	35.1598	20.1652	22.5581	47.17	23.7501	36.3257	23.001	26.4694	20.4906	22.9249	44.3344	18.2477	24.0126	15.4797	44.2716	29.4181	23.9366	28.4646	53.2791	46.2661
1700007P06Rik	0	0	0	0	0	0	0	0	0	0	0	0	0	0	0	0	0	0	0	0	0	0	0	0
1700008C04Rik	0	0	0	0	0	0	0	0	0	0	0	0	0	0	0	0	0	0	0	0	0	0	0	0
1700008J07Rik	28.9166	36.1422	56.3843	66.7734	88.6796	47.5675	73.1451	59.3971	51.3989	65.9237	69.8075	75.1864	67.6724	54.1707	43.9314	44.1498	54.0779	84.4108	35.0273	56.7382	56.637	42.0837	51.4527	63.0806
1700008K24Rik	0	0	0	0	0	0	0	0	0	0	0	0	0	1.16035	0	0	0	0	0	0	0	0	0	0
1700008O03Rik	0	0	0	0	0	10.0976	0	0	0	9.10022	3.54766	0	4.64159	0	0	0	0	3.92083	1.93784	0.812926	0	9.01056	2.75973	0
1700008P02Rik	0	0	0	0	0	0	0	0	0	0	0	0	0	0	0	0	0	0	0	0	0	0	0	0
1700009C05Rik	0	0	0	0	0	0	0	0	0	0	0	0	0	0	0	0	0	0	0	0	0	0	0	0
1700009J07Rik	0	0	0	0	1.06806	0	0	0	0	0	0	3.64685	0	0	0	0	2.14094	0	4.77231	0	0	1.78839	0.923109	2.65675
1700009N14Rik	0	0	0	0	0	0	0	0	0	0	0	0	0	0	0	0	0	0	0	0	0	0	0	0
1700010B08Rik	0	0	0	0	0	0	0	0	0	0	0	0	0	0	0	0	0	0	0	0	0	0	0	0
1700010D01Rik	0	0	0	0	0	0	0	0	0	0	0	0	0	0	0	0	0	0	0	0	0	0	0	0
1700010I02Rik	0	0	0	0	0	0	0	0	0	0	0	0	0	0	0	0	0	0	0	0	0	0	0	0
1700010I14Rik	0	3.89064	11.885	3.53402	8.61348	3.84396	0	3.03727	1.38685	5.44087	11.8279	0	0	7.01814	7.03678	11.0756	22.4905	8.45834	5.93965	5.52366	1.94336	5.42415	8.2956	0.889452
1700010J16Rik	0	0	0	0	0	0	0	0	0	0	0	0	0	0	0	0	0	0	0	0	0	0	0	0
1700010K23Rik	0	0	0	0	0	0	0	0	0	0	0	0	0	0	0	0	0	0	0	0	0	0	0	0
1700010N08Rik	0	0	0	0.932727	0	0	0	0	1.36548	0	0	0	0	0	0	0	0	0	0	0	0	0	0	0
1700011B04Rik	0	0	0	0	0	0	0	0	0	0	0	0	0	0	0	0	4.3552	0	0	0	0	0	0	0
1700011C11Rik	0	0	0	0	0	0	0	0	0	0	0	0	0	0	0	0	0	0	0	0	0	0	0	0
1700011L22Rik	0	0	0	0	0	0	0	0	1.32983	0	0	0	0	0	0	0	0	0	0	0	0	0	0	0
1700011M02Rik	0	0	0	0	0	0	0	0	0	0	0	0	0	0	0	0	0	0	0	0	0	0	0	0
1700012A03Rik	0	0	0	0	0	0	0	0	0	0	0	0	0	0	0	0	0	0	0	0	0	0	0	0
1700012B07Rik	0	0	0	0	0	0	0	0	0	0	0	0	0	0	0	0	0	0	0	0	0	0	0	0
1700012B09Rik	0	0	0	0	0	0	0	0	0	0	0	0	0	0	0	0	0	0	0	0	0	0	0	0
1700012C14Rik	0	0	0	0	2.11689	3.82098	0	0	2.67444	0	0	0	0	0	0	0	0	0	0	0	0	0	0	0
1700012D01Rik	4.12487	22.4802	20.9129	13.9318	21.0405	28.271	25.8467	50.5485	34.8018	23.8151	18.0302	25.711	12.5423	21.8612	26.8132	17.9772	21.2318	42.8131	27.3831	31.9422	32.9494	26.0648	30.59	28.6741
1700012D14Rik	6.19742	10.3716	2.93413	3.75196	3.16644	0	8.75825	3.00398	5.31475	9.93508	1.23736	7.20443	14.1599	9.16911	11.0682	4.84895	8.73473	3.85553	7.8196	2.45084	0	0	4.55352	5.34327
1700012D16Rik	0	0	0	0	0	0	0	0	0	0	0	0	0	0	0	0	0	0	0	0	0	0	0	0
1700012H19Rik	0	0	0	0	0	0	0	0	0	0	0	0	0	0	0	0	0	0	0	0	0	0	0	0
1700012I11Rik	0	0	0	0	0	0	0	0	0	0	0	0	0	0	0	0	0	0	0	0	0	0	0	0
1700012P22Rik	0	0	0	0	0	0	0	0	0	0	0	0	0	0	0	0	0	0	0	0	0	0	0	0
1700013D24Rik	0	0	0	0	0	0	2.58918	0	0	0	0	0	0	0	0	0	0	0	0	0	0.961989	0	0	0
1700013F07Rik	1.04846	2.84766	0	0	0	0	0	0	0	0	0	0	0	0	4.01498	0	0	0	0	0	0	0	0	0
1700013G24Rik	0	0	0	0	0	0	0	0	0	0	1.23668	0	0	0	0	0	0	0	0	0	0	0.902351	0	4.43389
1700013H16Rik	0	0	0.963521	0	0	0	0	0	0	0	0	0	0	0	0	0	0	0	0	0	0	0	0	0
1700015F17Rik	0	0	0	0	0	0	0	0	0	0	0	0	0	0	0	0	0	0	0	0.807594	0	0	0	0
1700015G11Rik	0	0	0	0	0	0	0	0	0	0	0	0	0	0	0	0	0	0	0	0	0	0	0	0
1700016A09Rik	0	0.952147	0	4.86198	0	0	3.52936	0	0	0	0	4.40384	0	0	0	0.856867	0	0	2.90048	0	0	0	0.944601	0
1700016C15Rik	0	0	0	0	0	0	0	0	0	0	0	0	0	0	0	0	0	0	0	0.807594	0	0	0	0
1700016D06Rik	0	0	0	0	0	0	0	0	0	0	0	0	0	0	0	0	0	0	0	0	0	0	0	0
1700016G22Rik	0	0	0	0	0	0	0	0	0	0	0	0	0	0	0	0	0	0	0	0	0.961989	0	0	0
1700016H13Rik	0	1.92928	0	0	0	0	0	0	0	0	0	4.83304	0	0	0	0	0	0	0	0	0	0	0	0
1700016K05Rik	0	0	0	0	0	0	0	0	0	0	0	0	0	0	0	0	0	0	0	0	0	0	0	0
1700016K19Rik	0	0	0	0	0	0	0	0	0	0	0	0	0	0	0	0	0	0	0	0	0	0	0	0
1700016L04Rik	0	0	0	0	0	0	0	0	0	0	0	0	0	0	0	0	0	0	0	0	0	0	0	0
1700016L21Rik	0	0	0	0	0	0	0	0	0	0	0	0	0	0	0	0	0	0	0	0	0	0	0	0
1700016P04Rik	0	0	0	0	0	0	0	0	0	0	0	0	0	0	0	0	0	0	0	0	0	0	0	0
1700017B05Rik	281.522	229.868	295.294	218.972	345.796	298.996	260.755	246.77	340.763	303.846	333.085	314.949	359.695	365.69	318.394	382.878	356.813	266.805	349.095	330.57	318.566	337.023	377.1	363.786
1700017D01Rik	0	0	0	0	0	0	0	0	0	0.633634	0	0	0	0	0	0	0	0	0	0	0	0	0	0
1700017G19Rik	0	0	0	0	0	0	0	0	0	0	0	0	0	0	0	0	0	0	0	0	0	0	0	0
1700017J07Rik	0	0	0	0	0	0	0	0	0	0	0	0	0	0	0	0	0	0	0	0	0	0	0	0
1700017L05Rik	0	0	0	0	0	0	0	0	0	0	0	0	0	0	0	0	0	0	0	0	0	0	0	0
1700017N19Rik	0	0	0	5.59636	0	0	0	0	0	0	0	0	0	0	0	0	0	0	0	0	0	0	0	0
1700018A04Rik	0	0	0	0	0	0	0	0	0	0	0	0	0	0	0	0	0	0	0	0	0	0	0	0
1700018B08Rik	0	0	0	0	0	0	0	0	0	0	0	0	0	0	0	0	0	0	0	0	0	0	0	0
1700018B24Rik	0	0	0	0	0	0	0	0	0	0	0	0	0	0	0	0	0	0	0	0	0	0	0	0
1700018F24Rik	0	0	0	0	0	0	0	0	0	0	0	0	0	0	0	0	0	0	0	0	0	0	0	0
1700018G05Rik	0	0	0	0	0	0	0	0	0	4.37112	0	1.22604	0	0	0	0	0	0	0	0	0	0	0	0
1700018L02Rik	8.27783	10.5094	13.3621	24.1057	11.7186	13.7133	11.459	23.6281	11.5168	12.1694	16.5408	20.0307	9.27868	11.2289	6.74723	9.11652	24.0268	9.82335	22.2187	8.09541	17.7789	13.5137	13.0062	6.21079
1700019A02Rik	0	0	0	0	0	0	0	0	0	0	0	0	0	0	0	0	0	0	0	0	0	0	0	0
1700019C18Rik	0	0	0	0	0	0	0	0	0	0	0	0	0	0	0	0	0	0	0	0	0	0	0	0
1700019D03Rik	11.3697	12.4165	15.4267	5.70433	1.06413	5.03646	2.61123	11.9541	6.61218	7.48901	17.0291	7.20222	6.27688	6.87222	15.749	10.4965	8.69738	4.86234	25.8939	24.4397	16.24	10.7476	8.27162	14.1907
1700019E08Rik	0	0	0	0	0	0	0	0	0	0	0	0	0	0	0	0	0	0	0	0	0	0	0	0
1700019G24Rik	0	0	0	0	0	0	0	0	0	0	0	0	0	0	0	0	0	0	0	0	0	0	0	0
1700019M22Rik	0	0	0	0	0	0	0	0	0	0	0	0	0	0	0	0	0	0	0	0	0	0	0	0
1700019N19Rik	0	0	0	0	0	0	0	0	0	0	0	0	0	0	0	0	0	0	0	0	0	0	0	0
1700019P21Rik	0	0	0	0	0	0	0	0	0	0	0	0	0	0	0	0	0	0	0	0	0	0	0	0
1700020A23Rik	0	0	0	0	0	0	0	0	0	0	0	0	0	0	0	0	0	0	0	0	0	0	0	0
1700020D05Rik	21.7034	15.2627	11.5278	16.2165	11.6944	10.0644	11.2727	7.49154	22.5012	10.6226	29.1508	3.59919	12.5691	26.4078	28.5371	4.78197	6.52674	12.63	11.5026	13.0776	13.3913	10.7848	7.35308	15.9879
1700020D14Rik	0	0	0	0	0	0	0	0	0	0	0	0	0	0	0	0	0	0	0	0	0	0	0	0
1700020G17Rik	0	0	0	0	0	0	0	0	0	0	0	0	0	0	0	0	0	0	0	0	0	0	0	0
1700020I14Rik	2231.25	1899.78	1974.66	1782.54	1908.85	1920.98	2012.59	1942.47	2796.93	2348.13	1995.17	2274.73	2351.64	2055.8	1694.73	1847.22	1612.97	1971.48	1758.01	1664.33	2170.75	2495.02	2005.9	2414.06
1700020L24Rik	0	0	0	0	7.47644	0	0	0	3.91069	0	0	3.53495	0	1.12654	0	0	0	0	0	0	0	0	0	0
1700020M21Rik	0	0	0	0	0	0	0	0	0	0	0	0	0	0	0	0	0	0	0	0	0	0	0	0
1700020N01Rik	0	1.92928	0	0	1.07974	0	0	0	0	0	0	0	0	0	0	0	0	0	0	0	0	0	0	0
1700020N15Rik	0	0	0	0	0	0	0	0	0	0	0	0	0	0	0	0	0	0	0	0	0	0	0	0
1700020N18Rik	0	0	0	0	0	1.2622	0	0	0	1.21902	0	0	0	0	1.97056	0.948959	0	0	0	0	0	0	4.64112	0
1700021F02Rik	0	0	0	0	0	0	0	0	0	0	0	0	0	0	0	0	0	0	0	0	0	0	0	0
1700021F05Rik	1189.51	1209.68	1121.57	1152.41	1220.29	1213.32	1322.69	1262.24	1566.35	1443.8	1234.07	1422.21	1481.37	1470.65	1195.09	1393.29	1137.41	1060.43	1159.82	1072.44	1059.75	1190.45	1083.16	1127.08
1700021F07Rik	0	0	0	0	0	0	0	0	0	0	0	0	0	0	0	0	0	0	0	0	0	0	0	0
1700021N21Rik	0	0	0	0	0	0	0	0	0	0	0	0	0	0	0	0	0	0	0	0	0	0	0	0
1700022A21Rik	0	0	0	0	0	0	0	0	0	0	0	0	0	0	0	0	0	0	0	0	0	0	0	0
1700022A22Rik	0	0	0	0	0	0	0	0	0	0	0	0	0	0	0	0	0	0	0	0	0	0	0	0
1700022E09Rik	0	0	0	0	0	0	0	0	0	0	0	0	0	0	0	0	0	0	0	0	0	0	0	0
1700022H01Rik	1.02813	0	6.74851	0.951562	7.42326	8.78457	4.33131	2.98728	5.26146	2.5047	0	4.811	0	3.42987	0.985264	7.70008	0	0.9663	7.69287	0	0.954793	0	0	0
1700022H16Rik	0	0	0	0	0	0	0	0	0	0	0	0	0	0	0	0	0	0	0	0	0	0	0	0
1700022I11Rik	0	0	0	0	0	0	0	0	0	0.633634	0	0	4.77505	0	0	0	0	0	0	0	0.96055	0	0	1.75933
1700023C21Rik	0	0	0	0	0	0	0	0	0	0	0	0	0	0	0	0	0	0	0	0	0	0	0	0
1700023D09Rik	0	0.940951	0	0.957146	2.10997	0	5.25739	0	2.60807	2.48272	9.72286	2.38962	3.11692	0	1.98182	0	3.90141	5.21323	1.75172	5.39079	0.892041	0	8.31304	3.35067
1700023F02Rik	0	0	0	0	0	0	0	0	0	0	0	0	0	0	0	0	0	0	0	0	0	0	0	0
1700023F06Rik	0	0	0.961482	0	3.20591	0	0.878203	1.48902	0	1.22153	7.19275	3.54329	0	4.57073	1.93171	0.923912	0	2.9626	0	1.62196	0.947001	1.82699	0	1.7873
1700024B18Rik	0	0	0	0	0	0	0	0	0	0	0	0	0	0	0	0	0	0	0	0	0	0	0	0
1700024F13Rik	0	0	0	0	0	0	0	0.746314	0	0.633634	0	0	0	0	0	0	0	0	0	0	0	0	0	0
1700024G13Rik	0	0	0	0	0	0	0	0	1.36416	0	0	0	0	0	0	0	0	0	0	0	0	0	0	0
1700024I08Rik	0	0	0	0	0	0	0	0	0	0	0	0	0	0	0	0	0	0	0	0	0	0	0	0
1700024N05Rik	0	0	0	0	0	0	0	0	0	0	0	0	0	0	0	0	0	0	0	0	0	0	0	0
1700024P04Rik	0	0	0	0	0	0	0	0	0	0	0	0	0	0	0	0	0	0	0	0	0	0	0	0
1700025B11Rik	0	0	0	0	0	0	0	0	0	0	0	0	0	0	0	0	0	0	0	0	6.73392	0	0	0
1700025C18Rik	0	0	0	0	0	0	0	0	0	0	0	0	0	0	0	0	0	0	0	0	0	0	0	0
1700025F22Rik	0	0	0	0	0	0	0	0	0	0	0	0	0	0	0	0	0	0	0	0	0	0	0	0
1700025F24Rik	0	0	0	0	0	0	0	0	0	0	0	0	0	0	0	0	0	0	0	0	0	0	0	0
1700025G04Rik	1451.27	1307.58	1226.17	1453.1	1394.96	1343.83	1288.29	1246.38	2173.28	1763.06	1670.44	1979.19	1671.96	1742.88	1592.58	1853.29	2090.37	2097.01	2042.23	2212.77	1822.1	2049.63	2000.59	1935.58
1700025J12Rik	0	0	0	0	0	0	0	0	0	0	0	0	0	0	0	0	0	0	0	0	0	0	0	0
1700025K24Rik	0	0	0	0	0	0	0	0	0	0	0	0	0	0	0	0	0	0	0	0	0	0	0	0
1700025M24Rik	0	0	0	0	0	0	0	0	0	0	0	0	0	0	0	0	0	0	0	0	0	0	0	0
1700025N23Rik	0	0	0	2.87308	3.1807	0	0.857644	0	0	0.626471	0	0	0	1.14676	0	0.967939	0	0.960697	5.71972	0.814059	0	0	0	0.884096
1700026D11Rik	0	0	0	0	0	0	0	0	0	0	0	0	0	0	0	0	0	0	0	0	0	0	0	0
1700026F02Rik	0	0	0	0	0	0	0	0	0	0	0	0	0	0	0	0	0	0	0	0	0	0	0	0
1700026J14Rik	0	0	0.963521	0	0	0	0	3.74422	0	0	0	0	0	0	0	0	0	0	0	0	0	0	0.913531	0
1700027A15Rik	0	0	0	0	0	0	0	0	0	0	0	0	0	0	0	0	0	0	0	0	0	0	0	0
1700027F06Rik	0	0	0	0	0	0	0	0	0	0	0	0	0	0	0	0	0	0	0	0	0	0	0	0
1700027F09Rik	0	0	0	0	0	0	0	0	0	0	0	0	0	0	0	0	0	0	0	0	0	0	0	0
1700027H10Rik	0	0	0	0	0	0	0	0	0	0	0	0	0	0	0	0	0	0	0	0	0	0	0	0
1700027I24Rik	0	0	0	0	0	0	0	0	0	0	0	0	0	0	0	0	0	0	0	0	0	0	0	0
1700027J07Rik	0	0	0	0	0	0	0	0	0	0	0	0	0	0	0	0	0	0	0	0	0	0	0	0
1700028B04Rik	1.01717	0	0	0	0	0	0	0	0	1.87838	0	1.22275	0	1.16035	0	0	0	0	0	0	0	1.80224	0	0
1700028D13Rik	0	0	0	0	0	0	0	0	0	0	0	0	0	0	0	0	0	0	0	0	0	0	0	0
1700028E10Rik	17.7238	1.60406	3.74597	0	1.64386	0	2.36634	2.57321	9.09357	3.85263	1.88624	4.59302	6.7101	0	0	1.54726	12.3119	0	12.1162	6.86005	1.5649	1.91916	0	7.05486
1700028I16Rik	0	0	0	0	0	0	0	0	0	0	0	0	0	0	0	0	0	2.91942	0	0	0	0	0	0
1700028J19Rik	11.3307	10.5001	19.2792	13.35	10.6617	11.2926	2.58856	15.0368	13.3186	18.096	13.4821	10.8593	12.5582	16.1031	12.7739	21.0633	10.7841	15.6506	8.57681	8.94983	7.63125	8.12046	3.70038	11.5242
1700028K03Rik	0	0	0	0	0	12.622	0	0	0	0	0	3.64786	0	0.560038	0	0	0	0	0	2.43211	0	1.80358	0	0
1700028M03Rik	0	0	0	0	0	0	0	0	0	0	0	0	0	0	0	0	0	0	0	0	0	0	0	0
1700028P14Rik	0	0.964641	0	0	0	0	0	0	0	0	0	0	0	0	0	0	0	0	0	0	0	0	0	0
1700028P15Rik	0	0	0	0	0	0	0	0	0	0	0	0	0	0	0	0	0	0	0	0	0	0	0	0
1700029B22Rik	0	0	0	0	0	0	0	0	0	0	0	0	0	0	0	0	0	0	0	0	0	0	0	0
1700029F12Rik	0	0	0	0	0	0	0	0	0	0	0	0	0	0	0	0	0	0	0	0	0	0	0	0
1700029H14Rik	0	0	0	0	0	0	0	0	0	0.654277	0	3.51041	0	0	0	0	0	0	0	0	0	0	0	0
1700029I15Rik	3.13927	0	0	0	7.41324	0	0	0	0	0	2.35995	0	1.54477	1.12735	2.02298	4.72428	0	0.957875	5.90303	0.812769	1.88447	0	0	2.75136
1700029J03Rik	0	0	0	0	0	0	0	0	0	0	0	0	0	0	0	0	0	0	0	0	0	0	0	0
1700029J07Rik	35.0265	33.5443	88.0919	35.7857	49.0712	68.3849	55.5104	54.6872	64.0494	56.6741	44.5241	131.257	96.2088	67.6474	40.8564	43.1178	77.8248	51.1423	44.7993	48.9218	43.6897	48.3321	37.4616	58.8841
1700029M20Rik	0	0	0	0	0	0	0	0	0	0	0	0	0	1.16035	0	0	0	0	0	0	0	0	0	0
1700029N11Rik	0	0	0	0	0	0	0	0	0	0	0	0	0	0	0	0	0	0	0	0	0	0	0	0
1700029P11Rik	0	0	0	0	0	0	0	0	0	0	0	0	0	0	0	0	0	0	0	0	0	0	0	0
1700030A11Rik	0	0	0	0	0	0	0	0	0	0	0	0	0	0	0	0	0	0	0	0	0	0	0	0
1700030C10Rik	22.7477	20.2029	46.959	17.1428	21.3663	20.0722	20.8556	20.7967	21.3104	42.5869	32.5995	38.3918	53.5948	40.2122	37.087	45.5777	21.8662	62.0796	42.8607	14.616	23.8465	35.1954	29.3122	56.5396
1700030C14Rik	0	0	0	0	0	0	0	0	0	0	0	0	0	0	0	0	0	0	0	0	0	0	0	0
1700030F04Rik	0	0	0	0	0	0	0	0	0	0	0	0	0	0	0	0	0	0	0	0	0	0	0	0
1700030F18Rik	0	0	0	0	0	0	0	1.49263	0	2.50884	0	0	0	1.14717	0	1.95601	0	0	0	0	0	0	0	0
1700030J22Rik	6.23971	16.4494	13.9783	12.319	10.7486	10.1496	7.79604	9.75677	6.86618	1.28147	21.1864	18.3868	27.4761	7.07016	15.3583	9.84584	23.1633	6.81031	8.57935	8.14136	3.76255	10.5963	9.32226	14.5936
1700030K09Rik	116.508	115.354	130.756	117.785	139.086	121.648	132.596	122.01	161.506	162.849	224.088	172.844	154.794	136.362	166.437	173.624	132.283	156.969	114.493	131.343	157.777	126.015	168.233	108.524
1700030L20Rik	0	0	0	0	0	0	0	0	0	0	0	0	0	0	0	0	0	0	0	0	0	0	0	0
1700030M09Rik	2.07588	0.958848	0	0	0	1.26194	0	0.752805	1.338	2.51283	4.92311	0	0	1.15076	0.985696	3.81689	0	0	0	0	0	0	0	0
1700030N03Rik	0	0	0	0	0	0	0	0	0	0	0	0	0	0	0	0	0	0	0	0	0	0	0	0
1700030O20Rik	0	0	0	0	0	0	0	0	0	0	0	0	0	0	0	0	0	0	0	0	0	0	0	0
1700031A10Rik	0	0.964641	0	0	0	0	0	0	0	0	0	0	3.15467	0	0	0	6.38943	0	3.83854	0.815251	0	0	0	0
1700031F05Rik	0	0	0	0	0	0	0	0	0	0	0	0	0	0	0	0	0	0	0	0	0	0	0	0
1700031L13Rik	0	0	0	0	0	0	0	0	0	0	0	0	0	0	0	0	0	0	0	0	0	0	0	0
1700031M16Rik	0	0	0	0	0	0	0	0	0	0	0	0	0	0	0	0	0	0	0	0	0	0	0	0
1700031P21Rik	0	0	0	0	0	0	0	0	0	0	0	0	0	0	0	0	0	0	0	0	0	0	0	0
1700034E13Rik	0	0	0	0	0	0	0	0	0	0	0	0	0	0	0	0	0	0	0	0	0	0	0	0
1700034G24Rik	0	0	0	0	0	0	0	0	0	0	0	0	0	0	0	0	0	0	0	0	0	0	0	0
1700034H15Rik	13.4345	16.3882	12.5904	5.63084	5.3445	3.78717	1.72554	8.20698	2.71998	8.88866	6.16258	12.1291	7.93789	11.5939	2.96427	10.6839	2.17696	5.80262	6.62848	9.72698	11.515	9.91231	1.82304	17.5989
1700034I23Rik	13.4994	6.70598	6.01896	11.0713	0	0	4.31385	3.02492	19.3266	12.281	0	9.88701	14.3379	0	5.11326	6.0666	0	3.84829	0	4.08093	6.77306	6.14355	6.34236	0
1700034J05Rik	0	0	0	0	0	0	0	0	0	0	0	0	0	0	0	0	0	0	0	0	0	0	0	0
1700034K08Rik	0	0	0	0	0	0	0	0	0	0	0	0	0	0	0	0	0	0	0	0	0	0	0	0
1700034P13Rik	0	0	0	0	0	0	3.45224	0	0	1.24448	0	0	3.13031	0	1.00248	0	0	0	0	0.819226	0.958076	0	0	0.891577
1700036G14Rik	0	0	0	0	0	0	0	0	0	0	0	0	0	0	0	0	0	0	0	0	0	0	0	0
1700037C18Rik	51.4901	30.5383	32.7001	18.9443	42.328	32.7242	59.0615	36.3113	58.7695	42.7097	35.4226	46.3293	45.4852	37.6509	43.5989	32.1706	22.4407	56.7429	50.6738	39.988	53.3431	52.4759	31.1952	40.506
1700037H04Rik	156.592	129.251	116.263	126.954	114.002	125.565	164.203	155.745	235.865	159.313	158.569	176.009	202.759	204.352	155.573	160.726	225.715	161.819	173.892	181.292	174.21	165.471	210.163	180.657
1700039E22Rik	0	0	0	0	0	0	0	0	0	0	0	0	0	0	0	0	0	0	0	0	0	0	0	0
1700039M10Rik	0	0	0	0	0	0	0	0	0	0	1.23668	0	0	0	0	0	0	0	0	0	0	0	0	0
1700040D17Rik	0	3.80652	5.97706	2.71043	5.27009	0	6.93807	3.81395	2.76341	3.19579	6.49588	2.46214	0	0	0	4.08601	0	4.83781	8.63303	2.4366	2.91267	2.63744	1.81973	5.29631
1700041A01Rik	0	0	0	2.79818	0	0	0	0	0	0.633634	0	0	4.77505	0	0	0	0	0	0	0	0	0	0	0
1700041C23Rik	0	0	0	0	0	0	0	0	0	0	0	0	0	0	0	0	0	0	0	0	0	0	0	0
1700041M19Rik	0	0	0	0	0	0	0	0	0	0	0	0	0	0	0	0	0	0	0	0	0	0	0	0
1700042G07Rik	0	0	0	0	0	0	0	0	0	0	0	0	0	0	0	0	0	0	0	0	0	0	0	0
1700042G15Rik	0	0	0	0	0	0	0	0	0	0	0	0	0	0	0	0	0	0	0	0	0	0	0	0
1700042O10Rik	0	0	1.92704	0	0	0	0	0	0	0	0	0	0	0	0	0	0	0	0	0	0	0.905645	0	0
1700044C05Rik	0	0	0	0	0	0	0	0	0	0	0	0	0	0	0	0	0	0	0	0	0	0	0	0
1700044K03Rik	0	0	0	0	0	0	0	0	0	0	0	0	0	0	0	0	0	0	0	0	0	0	0	0
1700045H11Rik	0	0	0	0	0	0	0	0	0	0	0	0	0	0	0	0	0	0	0	0	0	0	0	0
1700046C09Rik	0	0	0	0	0	0	0	0	0	0	0	0	0	0	0	0	0	0	0	0	0	0	0	0
1700047A11Rik	0	0	0	0	0	0	0	0	0	0	0	0	0	0	0	0	0	0	0	0	0	0	0	0
1700047E10Rik	0	0	0	0	0	0	0	0	0	0	0	0	0	0	0	0	0	0	0	0	0	0	0	0
1700047G03Rik	0	0	0	0	0	0	0	0	0	0	0	0	0	0	0	0	0	0	0	0	0	0	0	0
1700047I17Rik2	465.317	448.005	378.731	412.889	437.292	411.48	421.146	389.166	536.512	487.388	562.698	529.603	517.334	446.551	457.657	536.983	548.712	486.55	480.998	481.226	494.384	485.008	502.044	492.214
1700047L14Rik	0	0	0	0	0	0	0	0	0	0	0	0	0	0	0	0	0	0	0	0	0	0	0	0
1700047M11Rik	4.14117	4.72878	1.95109	0.96045	0	1.25926	3.45865	9.04086	5.26553	3.77033	1.2274	0	0	0	1.98417	4.84194	0	0	0	2.47296	1.8991	0	0	2.64743
1700048M11Rik	0	0	0	0	0	0	0	0	0	0	0	0	0	0	0	0	0	0	0	0	0	0	0	0
1700048O20Rik	10.3647	7.65477	5.90843	0.93819	1.07001	12.6878	18.9332	5.96226	5.45541	7.0555	3.71568	4.90399	4.79506	5.79767	6.97129	3.9616	10.8733	0.955119	11.3658	7.30825	16.2996	0	9.91756	6.12821
1700049E15Rik	0	0	0	0	0	0	0	0	0	0	0	0	0	0	0	0	0	0	0	0	0	0	0	0
1700049E17Rik1	0	0	0	0	0	0	0	0	0	0	0	0	0	0	0	0	0	0	0	0	0	0	0	0
1700049E17Rik2	0	0	0	0	0	0	0	0	0	0	0	0	0	0	0	0	0	0	0	0	0	0	0	0
1700049E22Rik	0	0	0	0	0	0	0	0	0	0	0	0	0	0	0	0	0	0	0	0	0	0	0	0
1700049L16Rik	0	0	0	0	0	0	0	0	0	0	0	0	0	0	0	0	0	0	0	0	0	0	0	0
1700051A21Rik	0	0	0	0	0	0	0	0	0	0	0	0	0	0	0	0	0	0	0	0	0	0	0	0
1700052I22Rik	0	0	0	0	0	0	0	0	0	0	0	0	0	0	0	0	0	0	0	0	0	0	0	0
1700052K11Rik	75.7718	67.3833	97.3642	104.981	93.368	75.5342	96.5217	84.1528	100.688	103.634	103.839	60.2343	122.502	90.7574	118.345	97.6273	96.9643	118.375	81.7921	79.2013	87.5382	99.3745	83.655	139.022
1700054A03Rik	0	0	0	0	0	0	0	0	0	0	0	0	0	0	0	0	0	0	0	0	0	0	0	0
1700054K19Rik	0	0.964641	0	0	0	0	0	0	0	0	0	0	0	0	0	0	0	0	0	0	0	0	0.913531	0
1700054M17Rik	0	0	0	0	0	0	0	0	0	0	0	0	0	0	0	0	0	0	0	0	0	0	0	0
1700055C04Rik	0	0	0	0	0	0	0	0	0	0	0	0	0	0	0	0	0	0	0	0	0	0	0	0
1700055D16Rik	19.7549	36.3498	34.2775	24.774	18.0312	36.377	26.0962	26.6576	45.3009	25.0899	14.1141	45.9444	16.997	38.1116	23.3129	26.9703	27.0676	36.946	20.1515	27.4168	21.1163	31.7547	35.6041	24.3512
1700056E22Rik	17.514	12.4224	7.53247	26.0987	24.4347	19.88	11.6903	10.2442	12.559	22.6615	31.244	10.3939	19.8607	26.5917	12.3952	16.819	4.40366	18.757	11.6895	31.5471	25.0145	31.5509	18.6339	9.80051
1700057G04Rik	0	0	0	0	0	0	0	0	0	0	0	0	0	0	0	0	0	0	0	0	0	0	0	0
1700057H15Rik	0	0	0	0	0	0	0	0	0	0	0	0	0	0	0	0	0	0	0	0	0	0	0	0
1700057H21Rik	0	0	0	0	0	0	0	0	0	0	0	0	0	0	0	0	0	0	0	0	0	0	0	0
1700060C16Rik	0	0	0	0	0	0	0	0	0	0	0	0	0	0	0	0	0	0	0	0	0	0	0	0
1700060C20Rik	0	0	2.89056	0	0	0	0	0	0	0	0	0	0	0	0	0	0	0	0	0	0	0	0	0
1700061F12Rik	0	0	0	0	0	0	0	0	0	0	0	0	0	0	0	0	0	0	0	0	0	0	0	0
1700061G19Rik	1.02807	0	0	2.83759	0	0	3.43487	0	0	0	0	1.20137	0	0	6.86349	0.958457	0	0	0	0	0	0.906481	0	3.53426
1700061I17Rik	0	0	0	0	0	0	0	0	0	0	3.71003	0	0	0	0	1.93003	0	1.93843	0	0	0	0	0	0
1700061J23Rik	0	0	0	0	0	0	0	0	0	0	0	0	0	0	0	0	0	0	0	0	0	0	0	0
1700061N14Rik	0	0	0	0	0	0	0	0	0	0	0	0	0	0	0	0	0	0	0	0	0	0	0	0
1700063A18Rik	0	0	0	0	0	0	0	0	0	0	0	0	0	0	0	0	0	0	0	0	0	0	0	0
1700063D05Rik	0	0	0	0	0	0	0	0	0	0	0	0	0	0	0	0	0	0	0	0	0	0	0	0
1700063H04Rik	0	0	0	0	0	0	0	0	0	0	0	0	0	0	0	0.965013	0	0	0	0	0	0	0	0
1700063O14Rik	0	0	0	0	0	0	0	0	0	0	0	0	0	0	0	0	0	0	0	0	0	0	0	0
1700064J06Rik	0	0	0	0	0	0	0	0	0	0	0	0	0	0	0	0	0	0	0	0	0	0	0	0
1700064M15Rik	0	0	0	0	0	1.2622	0	0	0	0	0	0	0	0	0	0	0	0	0	0	0	0	2.74059	0
1700065D16Rik	0	0	0	0	0	0	0	0	0	1.9009	0	0	0	1.19385	1.78028	2.07431	0	0	0	0	0	0	0	0
1700065I16Rik	0	0	0	0	0	0	0	0	0	0	0	0	0	0	0	0	0	0	0	0	0	0	0	0
1700065J11Rik	0	0	0	0	0	0	0	0	0	0	0	0	0	0	0	0	0	0	0	0	0	0	0	0
1700065J18Rik	0	0	0	0	0	0	0	0	0	0	0	0	0	0	0	0	0	0	0	0	0	0	0	0
1700065L07Rik	0	0	0	0	0	0	0	0	0	0	0	0	0	0	0	0	0	0	0	0	0	0	0	0
1700065O20Rik	0	0	0	0	0	0	0	0	0	0	0	0	0	0	0	0	0	0	0	0	0	0	0	0
1700066B17Rik	0	0.930836	0.983562	4.73453	1.05397	0	1.73386	0.760357	0	1.25051	0	0	0	4.59994	0	0	0	0	0	0	0	0	0	0
1700066B19Rik	1.03016	0	0.952943	4.71958	5.33382	6.28571	6.05542	2.97976	1.34164	3.75544	1.21384	0	3.16599	1.15516	1.95468	1.90484	4.38565	1.94581	5.71163	4.86829	0	0.904695	6.40065	0.884627
1700066C05Rik	0	0	0	0	0	0	0	0	0	0	0	0	0	0	0	0	0	0	0	0	0	0	0	0
1700066J03Rik	0	0	0	0	0	0	0	0	0	0	0	0	0	0	0	0	0	0	0	0	0	0	0	0
1700066M21Rik	83.1676	60.8302	62.6586	83.1827	62.346	74.7944	79.9046	63.4958	81.9195	85.8015	71.6882	123.644	77.5821	48.8692	64.3926	63.3387	76.6397	75.5696	63.2122	51.9098	39.3668	58.9309	75.6015	87.8355
1700066N21Rik	0	0	0	0	0	0	0	0	0	0	0	0	0	0	0	0	0	0	0	0	0	0	0	0
1700066O22Rik	0	0	0	0	0	0	0	0	0	0	0	0	0	0	0.984301	0	0	0	0	0	0	0	0	0
1700067G17Rik	0	0	0	0	0	0	0	0	0	0	0	0	0	0	0	0	0	0	0	0	0	0	0	0
1700067K01Rik	0	0	1.93246	0	0	0	0	0.750423	0	0	1.20745	0	0	1.15346	0	0.943404	0	0	0.955129	0	0.95361	0	0	1.78394
1700067P10Rik	0	0	0	0	0	0	0	0	0	0	0	0	0	0	0	0	0	0	0	0	0	0	0	0
1700069L16Rik	0	0	0	0	0	0	0	0	0	0	0	0	0	0	0	0	0	0	0	0	0	0	0	0
1700069P05Rik	0	0	0	0	0	0	0	0	0	0	0	0	0	0	0	0	0	0	0	0	0	0	0	0
1700071K01Rik	0	0	0	0	0	0	0	0	0	0	0	0	0	0	0	0	0	0.97314	0	0	0	0	0	2.65066
1700071M16Rik	0	0	0	0	0	0	0	0	0	0	0	0	0	0	0	0	0	0	0	0	0	0	0	0
1700072B07Rik	0	0	0	0	0	0	0	0	0	0	0	0	0	0	0	0	0	0	0	0	0	0	0	0
1700072I22Rik	0	0	0	0	0	0	0	0	0	0	0	0	0	0	0	0	0	0	0	0	0	0	0	0
1700072O05Rik	0	0	0	0	0	0	0	0	0	0	0	0	0	0	0	0	0	0	0	0	0	0	0	0
1700073E17Rik	0	0	0	0	0	0	0	0	0	0	0	0	0	0	0	0	0	0	0	0	0	0	0	0.883552
1700074H08Rik	0	0	0	0	0	0	0	0	0	0	0	1.23128	0	0	0	0	0	0	0	0	0	0	0	0
1700074P13Rik	0	0	0	0	0	0	0	0	0	0	0	0	0	0	0	0	0	0	0	0	0	0	0	0
1700080E11Rik	0	0	0	0	0	0	0	0	0	0	0	0	0	0	0	0	0	0	0	0	0	0	0	0
1700080N15Rik	0	0	0	0	0	0	0	0	0	0	0	0	0	0	0	0	0	0	0	0	0	0	0	0
1700080O16Rik	0	0	0	0	0	0	0	0	0	0	0	0	0	0	0	0	0	0	0	0	0	0	0	0
1700081H04Rik	0	0	0	0	0	0	0	0	0	0	0	0	0	0	0	0	0	0	0	0	0	0	0	0
1700083H02Rik	0	0	0	0	0	0	0	0	0	0	0	0	0	0	0	0	0	0	0	0	0	0	0	0
1700084D21Rik	0	0	0	0	0	0	0	0	0	0	0	0	0	0	0	0	0	0	0	0	0	0	0	0
1700084E18Rik	1.0269	6.46494	4.91644	11.7133	5.28042	0	6.08215	6.11343	2.53498	6.66772	12.1993	3.58742	0	6.70906	0	8.50131	0	6.90205	4.9003	10.6966	1.88463	4.41501	6.65855	16.3045
1700084F23Rik	0	0	0	0	0	0	0	0	0	0	0	0	0	0	0	0	0	0	0	0	0	0	0	0
1700084J12Rik	0	0.964641	0	0	0	0	0	0	0	0	0	0	0	0	0	0	0	0	0	0	0	0	0	0
1700084M14Rik	0	0	0	0	0	0	0	0	0	0	0	0	0	0	0	0	0	0	0	0	0	0	0	0
1700085C21Rik	3.09511	0	0	0	0	1.2638	0	0	0	0	0	6.0413	0	0	0	0	0	0	0	0	0	0	0	0
1700086L19Rik	0	0	0	0	0	0	0	0	0	0	0	0	0	0	0	0	0	0	0	0	0	0	0	0
1700086O06Rik	15.6073	35.5167	17.218	22.046	14.9866	12.5902	28.7392	19.5846	21.7548	24.8363	18.374	36.1584	25.8381	38.3437	21.9502	30.9995	34.7411	16.8945	20.3543	21.864	25.869	26.3925	25.7375	13.7124
1700088E04Rik	19.6701	22.8776	37.4281	27.7362	30.2339	42.8615	27.6329	42.44	41.4782	63.8793	44.9754	65.2337	48.1395	47.3274	36.6167	25.2455	34.6481	21.2345	28.4053	48.0705	25.7861	31.9097	7.99687	9.69899
1700091H14Rik	0	0	0	0	0	0	0	0	0	0	0	1.20826	0	0	0	0	0	0	0	0	0	0	0	0
1700092C02Rik	0	0	0	0	0	0	0	0	0	0	0	0	0	0	0	0	0	0	0	0	0	0	0	0
1700092C10Rik	0	0	0	0	0	0	0	0	0	0	0	0	0	0	0	0	0	0	0	0	0	0	0	0
1700092E19Rik	0	0	0	0	0	0	0	0	0	0	0	0	0	0	0	0	0	0	0	0	0	0	0	0
1700092K14Rik	0	0	0.963521	0	0	0	0	0	0	0	0	0	0	0	0.994502	0	0	0	0	0	2.86666	2.62078	0	0
1700092M07Rik	0	0	0	0	1.05581	0	0.87308	0	0	0	0	0	0	0	0.984301	0	0	0	0	0	0	0.858423	3.76294	0
1700093K21Rik	0	0	2.96868	3.74534	0	1.26023	0.858009	0	0	0.494398	0	3.97653	0	0.892191	0	1.07895	0	0	6.72167	0.679701	0	0	0	0
1700094D03Rik	82.1399	100.568	70.6582	61.5405	62.122	73.865	48.9474	75.6114	145.091	90.9751	98.536	149.899	75.3437	97.5519	90.3826	73.8512	76.1755	108.018	52.3505	60.0692	67.6466	79.6227	86.0104	81.7941
1700094J05Rik	0	0	0	0	0	0	0	0	0	2.54748	0	0	0	0	0	0	0	0	0	0	0	0	0	0
1700094M24Rik	0	0	0	0	0	0	0	0	0	0	0	0	0	0	0	0	0	0	0	0	0	0	0	0
1700095A21Rik	0	0	0	0	0	0	0	0	0	0	0	0	0	0	0	0	0	0	0	0	0	0	0	0
1700095B10Rik	0	0	0	0	0	0	2.58918	0	0	0.633634	0	0	0	0	0	0	0	0	0	0	0	0	2.74059	0
1700095J03Rik	0	0	3.85151	7.44003	1.06299	0	3.47621	0.744192	0	1.89422	8.67065	4.84231	0	0	0.99026	0.959206	0	5.81611	4.80323	0.810642	0	2.67102	2.74623	4.43084
1700095J12Rik	0	0	0	0	0	0	0	0	0	0	0	0	0	0	0	0	0	0	0	0	0	0	0	0
1700096J18Rik	0	0	0	0	0	0	0	0	0	0	0	0	0	0	0	0	0	0	0	0	0	0	0	0
1700096K18Rik	57.6586	67.6413	51.2066	63.1175	44.2855	36.6291	98.3555	60.5133	62.8012	79.0327	55.3138	66.9442	37.6276	56.8331	90.9825	47.5433	45.9958	57.21	35.4334	47.7516	56.6036	42.211	52.8147	48.9523
1700096P03Rik	0	0	0	0	0	0	0	0	0	0	0	0	0	0	0	0	0	0	0	0	0	0	0	0
1700097N02Rik	0	0	0	0	0	0	0	0	0	1.26727	0	0	0	0	1.9686	0	0	0	0	0	0	0	0.913773	0
1700099I09Rik	0	0	0	0	0	0	0	0	1.36529	0	0	0	0	0	0	0	0	0	0	0	0	0	0	0
1700100I10Rik	0	0	0	0	0	0	0	0	0	0	0	0	0	0	0	0	0	0	0	0	0	0	0	0
1700100L14Rik	0	0	0	0	0	0	0	0	0	0	0	0	0	0	0	0	0	0	0	0	0	0	0	0
1700101I11Rik	12.4685	24.6817	35.5574	42.9185	10.6619	29.0879	22.5004	25.4621	11.9816	24.146	19.5581	14.6203	7.9118	22.9447	26.8884	29.4921	4.32978	31.5855	47.8902	37.6917	34.4862	25.6119	28.2479	46.8857
1700101O22Rik	0	0	0	0	0	0	0	0	0	0	0	0	0	0	0	0	0	0	0	0	0	0	0	0
1700102H20Rik	0	0	0	1.79414	0	0	0	0	5.41396	3.90021	0	5.64464	4.90643	1.21211	0	0	0	0	0	0	2.85251	3.82416	0.853986	0
1700102P08Rik	19.655	10.4634	4.94519	2.78488	10.6289	5.10926	8.63315	5.28102	14.9138	10.1891	15.0704	8.53227	4.75774	2.31381	10.1111	6.94433	8.65636	7.72326	5.77552	3.26054	0.96787	7.94685	15.5379	4.43626
1700104L18Rik	0	0	0	0	0	0	0	0	0	0	0	0	0	0	0	0	0	0	0	0	0	0	0	0
1700105P06Rik	2.06492	0	1.92564	0	0	2.51275	1.75697	2.23516	0	0	0	0	0	2.27269	3.93763	0	0	0.97314	0	0	0	0.887977	0	0
1700108F19Rik	0	0	0.982511	0	3.19492	2.51798	0.861471	0	0	7.6077	0	0	0	0	0	0	0	0	0	4.85537	0	0	0	0
1700108J01Rik	0	0	0	0	0	0	0	0	0	0	0	0	0	0	0	0	0	0	0	0	0	0	0	0
1700109G14Rik	0	0	0	0	0	0	0	0	0	0	0	0	1.59168	0	0	0	0	0	0	0	0	0	0	0
1700109G15Rik	0	0	0	0	0	0	0	0	0	0	0	0	0	0	0	0	0	0	0	0	0	0	0	0
1700109H08Rik	1.04841	1.86035	4.299	0.905358	3.1393	0	5.18611	0.784717	0	1.91797	1.38427	1.26054	1.59859	0	4.49511	0	0	6.57495	1.98415	0	0.984841	4.11943	0.923345	1.80637
1700109I08Rik	0	0	0	0	0	0	0	0	0	0	0	0	0	0	0	0	0	0	0	0	0	0	0	0
1700109K24Rik	0	0	0	0	0	0	0	0	0	0	0	0	0	0	0	0	0	0	0	0	0	0	0	0
1700110C19Rik	3.087	2.81715	2.90901	0.954574	1.06592	0	0	0	2.63323	0.627312	0	0	0	1.14222	5.9252	0.963815	0	0	0.96602	0	0	0	0	2.65686
1700110I01Rik	0	0	0	0	13.5553	2.56996	3.40705	3.04344	0	4.50134	0	0	0	0	1.04497	0	0	0	0	0.819691	1.91994	0	5.41613	0
1700110I07Rik	0	0	0	0	0	0	0	0	0	0	0	0	0	0	0	0	0	0	0	0	0	0	0	0
1700110K17Rik	0	0	0	0	0	0	0	0.746314	0	0	0	0	0	0	0	0	0	0	0	0	0	0	0	0
1700111N16Rik	0	0	0	0	0	0	0	0	0	0	0	0	0	0	0	0	0	0	0	0	0	0	0	0
1700112H15Rik	0	0	0	0	0	0	0	0	0	0	0	0	0	0	0	0	0	0	0	0	0	0	0	0
1700112J05Rik	0	0	0	0	0	0	0	0	0	0	0	0	0	0	0	0	0	0	0	0	0	0	0	0
1700112J16Rik	0.797042	2.93948	53.4524	0.720441	12.5074	6.84882	1.1596	9.45888	0.92121	36.8779	5.01356	4.96228	0	9.66335	11.9202	3.26939	0	18.6088	4.90714	12.4814	2.22347	1.36544	5.5663	4.73567
1700113A16Rik	9.27157	8.55235	4.89881	1.86221	3.17553	12.7293	3.45252	17.4404	10.7747	8.17792	6.2967	12.1585	7.85566	11.5553	6.05467	8.84126	17.1521	5.85076	14.4522	1.63148	12.5434	6.22273	4.6135	3.55762
1700113B09Rik	0	0	0	0	0	0	0	0	0	0	0	0	0	0	0	0	0	0	0	0	0	0	0	0
1700113H08Rik	11.4182	7.65504	3.91597	7.59289	9.63539	7.57116	3.44527	10.4568	14.8144	2.54482	6.11635	15.8264	9.54817	5.77655	4.93517	6.83199	0	3.84588	3.8012	11.3861	2.8803	7.13657	4.55495	7.9366
1700116B05Rik	0	0	0	0	0	0	0	0	0	0	0	0	0	0	0	0	0	0	0	0	0	0	0	0
1700119H24Rik	0	0	2.92895	0	1.06247	0	0	0	0	0	0	0	0	0	0	0	0	1.92297	2.87356	2.42558	0	0	0	0
1700120C14Rik	34.1668	41.3446	29.2893	23.3766	33.366	24.0886	42.898	25.1735	51.2028	52.5171	39.8412	31.9457	27.6725	41.3988	50.2116	50.2389	62.3921	66.3589	52.2054	48.3519	40.7945	42.4985	50.7405	29.2241
1700120E14Rik	0	0	0	0.932727	0	1.25381	0	0	0	0	0	0	0	0	0	0	2.18161	0	0.945733	0	0	0.905645	0	0
1700120G07Rik	0	0	0	0	0	0	0	0	0	0	0	0	0	0	0	0	0	0	0	0	0	0	0	0
1700120K04Rik	0	0	0	0	0	0	0	0	0	2.53454	0	0	4.77505	0	0	0	2.17116	0.986523	0	0	0	0.891327	0	3.62136
1700121L16Rik	0	0	0	0	0	0	0	0	0	0	0	0	0	0	0	0	0	0	0	0	0	0	0	0
1700121N20Rik	0	0	0	0	0	0	0	0	0	0	0	0	0	0	0	0	0	0	0	0	0	0	0	0
1700122C19Rik	0	0	0	0	0	0	0	0	0	0	0	0	0	0	0	0	0	0	0	0	0	0	0	0
1700122H20Rik	0	0	0	0	0	0	0	0	0	0	0	0	0	0	0	0	0	0	0	0	0	0	0	0
1700122O11Rik	0	0	0	0	0	0	0	0	0	0	0	0	0	0	0	0	0	0	0.947474	0	0	0	0	0
1700123J17Rik	1.0281	0	0	0.935995	0	0	0	0	0	0	0	1.2168	4.79212	0	0	0	0	0	2.82654	0	0.961037	0	0.907468	0
1700123K08Rik	0	0	0	0	0	0	0	0	0	0	0	0	0	0	0	0	0	0	0	0	0	0	0	0
1700123L14Rik	0	0	0	0	0	0	0	0	0	0	2.46478	0	0	0	0	0.966931	0	0	0	0	0	0	0	0
1700123M08Rik	48.744	35.3055	69.2428	59.1921	68.3423	71.7894	52.643	77.8631	62.6455	81.664	91.4964	57.0257	44.284	79.3505	68.138	62.1719	45.5824	50.0925	59.1231	36.7439	28.7431	71.4673	37.4887	30.9395
1700123O12Rik	0	0	0	0	0	0	0	0	0	0	0	0	0	0	0	0	0	0	0	0	0	0	0	0
1700123O20Rik	215.395	214.101	216.253	203.158	215.355	202.586	217.313	249.329	302.838	265.712	257.964	305.124	212.983	256.899	253.737	276.437	175.334	219.043	228.16	222.174	272.904	250.764	209.233	260.469
1700123O21Rik	0	0	0	0	0	0	0	0	0	0	0	0	0	0	0	0	0	0	0	0	0	0	0	0
1700124L16Rik	0	1.90089	0	0	0	0	0	0	0	0	0	0	7.5969	0	0	1.90953	0	0.949188	5.82284	0.808351	0.946931	4.32177	0.95542	3.65736
1700125G02Rik	0	0	0	0	0	0	0	0	0	0	0	0	0	0	0	0	0	0	0	0	0	0	0	0
1700125G22Rik	0	0	0	0	0	0	0	0	0	0	0	0	0	0	0	0	0	0	0	0	0	0	0	0
1700125H03Rik	0	0	0	0	0	0	0	0	0	0	0	0	0	0	0	0	6.5328	0	0	0	0	0	0	0
1700125H20Rik	0	0	0	0	0	5.04878	0	0	0	0	0	0	0	0	0	0	0	0	0	0	0	0	0	0
1700126H18Rik	0	0	0	0	0	0	0	0	0	0	0	0	0	0	0	0	0	0	0	0	0	0	0	0
1700128A07Rik	0	0	0	0	0	0	0	0	0	0	0	0	0	0	0	0	6.5328	0	0	0	0	0	0	0
1700128F08Rik	0	0	0	0	0	0	0	0	0	0	0	0	0	0	0	0	0	0	0	0	0	0	0	0
1700129C05Rik	0	0	0	0	0	0	0	0	0	0	0	0	0	0	0	0	0	0	0	0	0	0	0	0
1810006J02Rik	7.07756	0.907801	7.529	9.75272	2.03336	4.19443	3.49921	0	0	0.645874	9.13083	11.3927	3.01393	4.6591	19.3033	9.04513	7.75356	4.95218	4.14866	3.33135	4.12116	6.64633	6.70832	16.6145
1810007C17Rik	0	0	0	0	0	0	0	0	0	0	0	0	0	0	0	0	0	0	0	0	0	0	0	0
1810007D17Rik	0	0	0	0	0	0	0	0	0	0	0	0	0	0	0	0	0	0	0	0	0	0	0	0
1810008I18Rik	0	2.85893	0	0	0	1.27144	0	5.31844	0	3.75292	0	6.07241	0	2.29651	4.02463	0	0	0	0	0	0	0	0	0.887414
1810009A15Rik	229.235	245.462	272.248	234.645	201.14	221.533	328.786	222.278	380.199	382.674	258.622	350.509	322.098	298.213	363.987	354.103	285.937	282.751	250.824	300.136	302.645	298.624	262.481	325.185
1810009J06Rik	0	0	0	0	0	0	0	0	0	0	0	0	0	0	0	0	0	0	0	0	0	0	0	0
1810010D01Rik	2.0901	0	2.85545	0	5.30965	0	3.56326	0	5.19293	1.81456	4.72103	4.65685	0	2.26578	1.91981	1.80216	0	0	4.88798	3.27718	1.88782	3.65616	0	2.70604
1810010H24Rik	21.6443	14.2186	21.6301	14.8354	26.4352	24.307	21.5849	30.2847	28.406	28.9471	32.9718	32.8188	31.5805	33.5186	27.4303	35.5493	12.9318	14.5677	4.83975	7.3302	28.9885	21.1284	20.2174	14.2559
1810012K16Rik	0	0.961798	0	0	2.17825	0	0	0	3.92731	0	1.21959	9.76681	6.31494	1.14176	0.998706	1.96321	0	5.80392	0	0	0.963473	4.36071	2.75779	0
1810013A23Rik	0	0	0	0	0	0	0	0	0	0	0	0	0	0	0	0	0	0	0	0	0	0	0	0
1810013L24Rik	1480.34	1294.6	1181.57	1070.76	1273.46	1252.07	1274.47	1267.73	1807.74	1646.07	1460.09	1587.02	1657.55	1736.17	1326.45	1663.19	1245.79	1417.44	1184.9	1437.63	1408.53	1456.76	1386.77	1346.3
1810014B01Rik	174.75	226.921	212.327	158.998	253.473	242.609	192.162	212.795	275.864	284.127	199.269	266.252	282.52	284.003	239.908	228.67	191.231	162.956	136.291	131.006	220.864	205.091	226.117	267.692
1810018F18Rik	0	0	0	0	0	0	0	0	0	0	0	0	0	0	0	0	0	0	0	0	0	0	0	0
1810019D21Rik	3.23094	1.00107	8.04253	4.30197	3.38185	5.72911	4.55993	7.5256	12.1953	2.53415	22.339	1.2217	1.59504	14.0189	16.905	7.7526	6.49213	7.8271	7.61173	11.3745	1.9427	3.99026	6.58137	7.21515
1810020O05Rik	0	0	0.981622	0	0	0	0	0.74618	0	0	0	0	0	0	1.96648	0	0	0.963952	0.956505	0	0	4.47296	0	0
1810021B22Rik	23.6189	25.4273	58.0609	43.3081	26.5876	50.1147	39.0703	50.6328	52.1145	45.4391	68.1527	32.2356	41.9061	40.9048	33.4385	40.6797	4.30976	20.7085	30.9227	24.5254	20.8317	36.7892	15.9099	24.1907
1810022K09Rik	246.533	290.626	277.768	385.028	370.085	259.834	367.347	301.68	438.55	419.525	315.925	474.643	311.709	292.781	242.053	297.749	406.662	329.345	250.81	280.977	313.982	347.787	306.239	332.318
1810024B03Rik	0	3.82897	0	0.944096	6.44368	5.12173	0.860759	3.01405	2.71459	3.84788	2.49803	1.22947	0	1.1591	5.03413	5.98535	2.17975	1.915	0	3.25449	0	1.75426	1.8197	1.7681
1810026B05Rik	277.472	230.545	223.671	201.333	229.987	213.364	241.957	239.712	416.627	269.478	295.954	331.228	255.573	247.752	246.543	304.155	235.005	283.882	233.802	229.654	296.714	267.815	213.355	246.444
1810030O07Rik	441.597	572.233	472.406	484.43	501.07	474.919	595.979	523.045	912.747	873.615	895.053	729.479	857.123	925.03	780.743	855.824	701.685	695.864	711.874	649.048	678.047	674.573	593.788	608.727
1810032O08Rik	54.6762	46.662	45.4392	60.6335	81.8863	50.6571	103.132	63.0778	115.958	47.1469	143.635	50.7248	35.715	59.2438	61.3501	75.6969	88.9358	62.5274	62.733	46.9706	71.9457	67.8813	74.4874	53.1172
1810034E14Rik	157.134	150.831	181.929	214.48	188.082	145.851	218.719	227.434	149.019	217.475	183.614	204.745	193.214	181.123	213.714	196.903	174.773	179.187	215.752	203.208	220.24	182.246	216.482	219.996
1810037I17Rik	623.163	707.413	647.687	639.208	694.258	834.719	754.706	805.137	916.884	796.355	917.323	1027.64	726.3	811.569	853.026	981.616	737.267	691.732	759.7	786.879	806.636	712.58	744.853	883.05
1810041H14Rik	0	4.75297	12.5691	0	0	1.56999	1.57738	3.36217	0	0.777661	1.14231	0	6.26437	1.12387	0	0.981627	8.18101	0	4.92974	4.91173	2.90085	11.0797	7.57812	0
1810043G02Rik	233.185	254.372	256.485	220.924	274.72	256.494	283.108	280.699	299.767	342.03	384.981	406.406	345.826	240.475	311.186	227.873	240.107	183.988	229.72	277.222	216.156	202.788	205.794	236.447
1810044D09Rik	41.3637	38.2236	56.816	52.2822	37.9606	51.7193	68.7245	50.1435	51.3606	73.3291	37.7803	67.3192	44.9335	64.5362	36.9376	41.3343	40.6944	39.9219	38.173	29.7565	60	29.8924	27.0758	71.9775
1810046K07Rik	0	0	0	0	0	0	0	0	2.7012	2.51868	7.43968	0	0	2.30182	0.991701	0	4.38379	2.92319	0	0	0	0	0	0
1810053B23Rik	0	0	0	0	0	0	0	0	0	0	1.23668	0	0	0	0	0	0	0	0	0	0	0	0	0
1810055G02Rik	181.815	111.05	163.917	155.348	211.704	193.226	156.843	195.967	262.645	220.268	223.637	248.823	221.957	224.171	234.969	236.547	327.46	187.303	204.857	238.626	233.321	255.368	313.762	251.535
1810058I24Rik	1291.98	1491.43	1233.09	1335.59	1344.96	1554.84	1273.4	1490.63	1629.61	1703.21	1576.54	1725.52	1279.56	1377.91	1675.55	1466.03	1115.64	1414.86	1391.91	1418.76	1495.18	1560.78	1353.75	1643.55
1810062G17Rik	5.15338	6.67429	0.966517	9.51571	0	5.03019	4.31932	6.01677	6.65495	9.38575	0	1.20859	3.13631	5.75476	7.90771	5.79071	0	0.972866	2.86069	4.88932	6.70322	2.69493	7.37589	4.43416
1810062O18Rik	0	6.63953	1.96565	2.84983	0	0	6.91156	2.25822	0	2.51556	3.69782	0	0	2.2947	5.99449	4.88986	4.31164	2.89702	0.963384	0	1.91057	0	0	1.7676
1810063I02Rik	0	0	0	0	0	0	0	0	0	0	0	0	0	0	0	0	0	0	0	0	0	0	0	0
1810064F22Rik	0	0	0	0	0	0	0	0	0	0	1.33346	0	0	0	0	0	0	1.87913	0	0	0	0	0	0
1810065E05Rik	0	0	0	0	0	0	0	0	0	0	0	0	0	0	0	0	0	0	1.89495	0	0	0	0	0
2010001A14Rik	21.6683	49.2808	23.3195	33.561	23.4031	42.7286	21.6035	33.2016	42.2058	31.8094	30.6373	32.659	26.5742	25.1958	38.5786	34.6794	21.4563	44.8747	45.0858	31.09	42.9485	37.5581	29.661	37.3518
2010003K11Rik	0	0	0	0	0	2.51246	0.86716	0	0	0.626571	0	0	0	0	0	0	0	0	0	0.813612	0	0	0	0
2010005H15Rik	0	0	0	0	0	0	0	0	0	1.9009	0	0	0	0	0	1.93003	0	0	0	0	0	0.851744	0	0.896212
2010009K17Rik	0	0	0	0	0	0	0	0	0	0	0	0	0	0	0	0	0	0	0	0	0	0	0	0
2010010A06Rik	0	0	0	0	0	0	0	0	0	0	0	3.62478	0	0	0	0	0	0	0	0	0	0	0	0
2010016I18Rik	3.0912	0	5.71042	5.71584	3.20797	1.2539	0	0.742031	2.6597	1.2453	7.21934	2.38737	0	1.14004	0.967294	0	0	3.90076	1.91324	4.06041	0.949584	0	0	4.43069
2010106C02Rik	0	0	0	1.86545	0	0	0	0.742168	0	0	0	0	0	0	0	0	2.1776	0	0	0	2.88597	0	0	0
2010106E10Rik	0	0	0	0	0	1.2622	0	0	0	0	0	0	0	0	0	0	0	0	0	0	0	0	0	0
2010109A12Rik	0	0	1.99909	0	5.16455	1.27342	1.70158	1.50604	2.67735	1.26935	0	4.98555	0	0	9.44989	0	0	0.959959	1.97855	0	0	1.69841	0	3.58343
2010109I03Rik	2.06229	0	3.84958	1.89164	4.26657	3.77066	0	0	1.34942	0.63029	1.22843	2.42241	15.7976	1.15703	9.82662	0	4.32772	1.94399	0.946903	0.811879	5.76043	3.61629	0.916601	7.05985
2010111I01Rik	1736.87	1616.87	1348.18	1930.95	1596.4	1828.82	1522.42	1504.87	2199.63	2093.85	1594.58	2288.75	1792.65	1611.24	1762.6	1924.08	2315.17	2178.16	2360.11	2531.42	2630.75	2520.21	3574.41	2816.07
2010204K13Rik	2.22208	2.01375	0	4.15622	1.10288	9.17172	6.17837	5.52794	1.33929	6.16378	11.4238	4.99183	7.99439	2.64748	2.04504	3.96154	6.28409	5.83228	1.07136	5.00265	1.68411	0.969091	3.22133	6.87388
2010300C02Rik	96.8661	84.0046	63.4794	77.4229	107.978	81.5653	86.6573	90.6003	69.9176	71.1708	87.0131	104.65	106.131	60.0175	97.0677	70.7016	66.1484	83.0268	104.563	132.585	82.1215	83.8619	117.939	84.9969
2010308F09Rik	0	0	0	0	0	0	0	0	0	0	0	0	0	0	0	0	0	0	0	0	4.80994	0	0	0
2010310C07Rik	0	0	0	0	0	0	0	0	0	0	0	0	1.59168	0	0	0	0	0	5.68484	0	0	0	0	0
2010315B03Rik	140.454	167.725	139.833	139.744	102.977	104.249	157.01	113.373	190.494	171.271	142.469	153.993	238.854	153.447	96.3796	96.8739	86.8955	191.979	168.821	112.012	136.401	139.605	124.361	224.484
2010320M18Rik	97.1063	97.4725	163.313	110.097	154.478	103.334	125.243	115.703	160.664	173.843	181.681	128.596	115.82	149.441	158.646	136.898	108.997	115.815	92.0393	140.179	126.976	119.666	127.26	110.967
2200002D01Rik	14.4368	10.2583	16.2902	17.347	7.35478	17.6445	10.5694	13.5783	26.6484	15.1232	23.8455	25.7884	15.4266	16.9259	9.86195	6.51554	19.6934	26.4946	23.7313	25.6281	25.6034	25.7103	54.3534	21.7614
2200002J24Rik	0	0	0	0.932727	0	0	0	0	0	0.622043	1.22797	0	0	0	3.96082	4.79766	6.43057	0	0	1.64448	0	0.881934	2.77674	4.43978
2210010C04Rik	0	0	0	0	0	0	0	0	0	0	0	0	0	0	0	0	0	0	0	0	0	0	0	0
2210011C24Rik	43.1159	23.9233	46.8891	32.8718	27.5936	44.6977	19.8142	17.5698	32.7868	38.0198	18.5543	31.1896	28.9655	44.3801	20.045	38.0642	32.9588	26.6657	26.3154	32.3695	29.6781	32.4122	27.0785	32.1292
2210016F16Rik	499.792	470.776	522.799	537.148	557.334	493.472	564.123	589.062	631.25	593.14	654.684	623.673	567.961	594.902	623.067	589.162	442.652	505.139	581.909	523.75	546.25	593.226	584.98	551.955
2210016L21Rik	402.355	425.593	377.514	445.349	430.779	417.267	492.169	439.114	494.962	529.775	436.384	549.103	513.635	431.01	512.639	567.546	410.384	411.21	485.453	465.28	443.687	382.793	429.099	449.872
2210039B01Rik	0	4.73191	3.92112	0	4.19709	1.27588	2.57871	2.28119	4.07586	0.634298	0	2.45252	7.85	5.81785	0	4.98874	0	0	0	0	0	1.79006	0	1.79708
2210404E10Rik	0	0	0	0	0	0	0	0	0	0	0	0	0	0	0	0	0	0	0	0	0	0	0	0
2210406O10Rik	0	1.25325	2.63223	4.59244	1.26846	6.36427	0	8.34875	3.34064	4.72967	5.1772	1.67763	4.06916	3.61344	0	8.66175	0	10.1326	2.26426	0	1.26043	7.95855	4.32846	0
2210407C18Rik	107.502	59.8449	53.1338	31.3938	49.3615	31.659	44.9668	39.5168	143.333	223.828	274.825	237.245	113.564	117.107	74.6492	176.509	404.224	166.167	218.92	181.459	92.9592	79.9437	476.993	79.372
2210408F21Rik	245.062	295.448	308.338	300.162	250.302	301.327	291.137	359.291	452.269	426.06	326.689	446.646	300.076	315.498	350.155	374.551	400.349	347.66	332.228	369.929	345.73	350.826	317.341	338.474
2210408I21Rik	79.8461	56.9506	77.977	57.8414	79.8305	39.2606	78.1684	61.9367	99.142	72.8036	51.2545	71.4681	79.9547	61.3534	104.503	41.7088	17.1948	54.1767	70.8232	88.4007	76.0284	34.9901	76.2095	58.1925
2210409D07Rik	0	2.80093	0.993769	0	1.05655	1.27494	0	3.82156	2.58862	0.626807	0	9.77924	0	2.27762	0	1.97041	0	0	0	0	4.77374	0	2.77071	0
2210409E12Rik	0	0	0	0	0	0	0	0	0	0	0	0	0	0	0	0	0	0	0	0	0	0	0	0
2210414B05Rik	0	0	0	0	0	0	0	0	0	0	0	0	0	0	0	0	0	0	0	0	0	0	0	0
2210416O15Rik	3.13462	2.8385	1.92311	10.7353	0	2.4913	2.64821	5.9084	2.46627	4.15514	1.17113	9.31988	0	1.09739	0.960689	2.64334	6.54261	2.9898	6.91494	5.66409	0.91726	0	5.67795	2.67998
2210417A02Rik	0	1.92928	0	0	0	0	0	0	0	1.26727	0	0	0	0	1.9686	0	0	0	0	0	0	0	0.906119	0.881141
2210418O10Rik	17.8728	81.2075	29.1291	0	0	75.3479	51.3036	49.2941	0	109.306	124.396	21.0299	126.862	49.4702	26.8545	9.37968	0	107.413	0	63.5208	3.89543	22.4231	112.142	117.844
2210420H20Rik	0	0	0	0	0	0	0	0	0	0	0	0	0	0	0	0	0	0	0	0	0	0	0	0
2300002M23Rik	0	0	0	0	0	0	0	0	0	0	0	0	0	0	0	0	0	0	0	0	0	0	0	0
2300003K06Rik	0	0	0	0	0	0	0	0	0	0	0	0	0	0	0	0	0	0	0	0	0	0	0	0
2300009A05Rik	192.892	231.924	181.315	194.337	214.746	231.844	211.182	190.862	199.583	193.92	201.998	232.007	204.737	153.65	192.937	138.758	130.036	148.055	137.362	186.363	163.724	158.813	178.955	168.035
2310001H17Rik	22.702	34.2449	26.2603	23.5562	25.2946	30.4086	24.0407	27.7912	43.9802	39.1299	31.2295	45.2961	33.3901	23.7229	23.8105	20.4163	6.43911	29.7556	13.5009	29.4906	38.5261	32.524	24.5134	27.1285
2310001K24Rik	1.03022	0.932248	7.72231	1.91588	11.5453	5.06323	7.92462	4.53114	1.28054	2.42942	10.8818	2.36275	3.07981	0	7.93459	6.58094	6.52645	4.89113	1.97764	9.07903	1.90093	2.63476	4.66684	1.81023
2310002D06Rik	4.15518	6.54016	7.89749	7.72093	9.48466	20.2814	19.9483	13.6458	3.88394	14.9787	8.59729	12.1463	1.55719	4.54645	8.05025	2.93509	6.40607	0.962611	0.975636	1.65553	2.87171	3.49303	5.54761	8.95343
2310002F09Rik	0	0	0	0	0	0	3.42567	3.00841	0	3.88192	1.28406	1.23575	0	0	5.13989	5.09432	0	0	0	0.808931	3.81814	0	0	3.46313
2310002L09Rik	1620.45	1786.58	1544.82	1732.53	1463.2	1664.32	1605.76	1854.79	2312.53	2013.43	1582.76	1933.26	1697.89	1964.82	1764.19	2015.38	1694.79	1848.74	1878.88	2019.35	1881.82	1996.65	2104.35	2055.29
2310003N18Rik	0	0	0	0	0	0	0	0	0	0	0	0	0	0	0	0	0	0	0	0	0	0	0	0
2310005A03Rik	0	0	0	0	0	0	0	0	0	0	0	0	0	0	0	0	0	0	0	0	0	0	0	0
2310005E17Rik	0	0	0	0	0	0	0	0	0	0	0	0	0	0	0	0	0	0	0	0	0	0	0	0
2310007B03Rik	0	0	0	0	0	0	0	0	0	0	0	0	0	0	0	0	0	0	0	0	0	0	0	0
2310008N11Rik	0	0.964641	0	0	0	2.57736	0	0	2.63614	2.52096	0	0	0	2.28491	0	0	0	0	0	0	0	0	0	0
2310009A05Rik	92.7638	137.022	111.304	136.743	119.005	130.834	107.59	146.563	195.794	171.529	154.001	184.531	158.584	158.912	182.542	155.997	161.575	142.648	154.837	111.152	134.991	149.579	164.119	142.049
2310009B15Rik	48.9349	68.0227	67.8254	55.6082	74.4016	74.9509	75.3897	80.1088	64.3174	77.3959	67.8209	84.9156	43.0312	84.4655	75.0053	78.3274	47.6541	57.6215	80.4805	59.0015	88.2537	64.4695	67.4269	50.5216
2310010J17Rik	13.1492	15.4475	21.2209	26.603	16.0624	31.0059	28.7924	14.7047	18.6041	20.7158	19.668	23.3059	7.81072	20.3703	7.1265	12.294	17.3043	20.4161	13.0799	12.6548	8.65337	12.9046	16.8664	18.1754
2310011J03Rik	381.081	540.382	402.694	442.582	363.011	433.161	506.872	465.66	592.859	581.455	470.473	522.884	477.438	517.849	539.015	577.983	481.048	495.439	590.39	531.251	506.652	491.799	537.983	530.935
2310015A10Rik	653.448	616.225	599.261	554.605	599.961	690.7	727.722	680.957	760.962	794.938	591.808	628.768	724.893	681.665	743.531	627.309	428.01	645.882	501.589	544.158	611.432	515.68	570.889	598.752
2310015D24Rik	10.353	43.2817	42.8508	34.9921	36.4637	42.8202	62.7921	47.7655	20.3502	52.2008	51.5927	25.5649	50.9268	50.9471	46.3064	44.7935	50.0126	35.7014	45.355	21.8896	42.1861	20.6808	35.5485	38.6862
2310016D03Rik	8.31234	10.4969	35.8135	7.44173	31.9908	24.2132	19.7945	39.9105	18.9973	28.9245	13.6933	14.7127	42.9132	17.3897	14.0794	26.8729	4.3265	5.76824	6.69744	4.07673	3.87147	12.4178	5.46819	1.76673
2310016G11Rik	2.06132	13.3409	8.65362	8.58507	17.0275	23.8628	8.65198	15.7733	26.5048	4.35493	21.9589	12.0045	9.41131	12.6287	14.7323	15.2582	6.49958	8.79793	2.87121	10.5952	5.72235	4.50487	0.924395	5.3321
2310020H05Rik	43.6682	20.8152	12.7689	15.3618	25.5224	37.8755	18.1594	23.31	27.6417	26.5048	13.4088	30.357	22.0504	18.3061	31.818	18.5326	30.2387	11.5324	4.81272	22.1821	20.1196	7.95716	15.5923	9.76957
2310022A10Rik	1466.82	1469.46	1383.08	1394.13	1651.02	1533.66	1494.8	1479.22	1534.64	1751.47	1661.13	1663.28	1465.33	1700.75	1709.07	1726.38	1546.34	1739.59	1465.53	1683.3	1747.78	1676.89	1768.79	1689.69
2310022B05Rik	1867.72	1863.37	1952.4	2158.13	2309.35	2206.82	1862.31	2169.51	2038.24	2046.63	2153.62	2077.62	2265.81	2256.16	2575.52	2390.79	2126.46	1997.15	2150.37	2001.07	2929.87	2926.47	2816.86	2946.41
2310030A07Rik	0	0	0	0	0	0	0	0	0	0	0	0	0	0	0	0	0	0	0	0	0	0	0	0
2310030G06Rik	77.6118	74.8392	70.8149	90.2453	75.239	74.2372	57.6244	87.9642	144.982	104.459	71.4096	143.903	114.024	106.296	109.599	114.493	122.033	99.132	126.442	92.3003	86.101	110.208	104.394	107.298
2310033P09Rik	187.996	228.179	196.249	207.838	217.244	203.004	274.179	207.067	248.3	214.419	237.062	209.877	269.787	253.899	255.511	214.392	292.278	233.428	285.175	260.642	256.143	266.855	255.906	289.971
2310034C09Rik	0	0	0	0	0	0	0	0	0	0	0	0	0	0	0	0	0	0	0	0	0	0	0	0
2310034G01Rik	31.0613	13.3125	22.2621	29.7319	13.8721	8.79382	13.023	14.9519	35.5381	23.0592	18.0987	30.0068	18.8642	13.7327	9.80079	29.5046	6.54705	22.3302	12.4995	10.6035	25.7495	12.5117	37.82	33.8236
2310034O05Rik	0	0	0	0	0	0	0	0	0	0	0	0	0	0	0	0	0	0	0	0	0	0	0	0.883552
2310039H08Rik	203.468	231.499	248.143	234.571	245.885	245.092	183.228	194.414	240.275	229.229	219.362	300.7	153.573	193.875	267.283	230.737	233.365	218.034	196.062	221.686	240.433	186.733	280.419	201.676
2310039L15Rik	54.8554	52.9545	47.8075	39.247	50.8992	85.8176	57.262	48.2089	56.5584	60.1448	54.9053	70.0311	42.3479	57.21	59.5592	48.4514	38.8944	42.5693	53.0469	45.974	65.192	54.1122	38.6621	44.5544
2310040G24Rik	147.368	234.159	268.457	169.998	231.714	203.356	257.992	221.796	271.861	239.424	284.351	248.292	213.165	265.812	217.785	180.71	119.741	155.995	129.033	129.588	191.373	176.483	134.51	164.852
2310043L19Rik	0	0	0	0	0	0	0	0	2.68576	1.27209	0	6.15001	0	0	0	0	0	0	0	0	2.92272	0.894257	0	0
2310043M15Rik	0	0	0	0	0	0	0	0	0	0.630292	0	0	0	0	0.982963	0	0	0	0	0	0	1.80531	0	0
2310043O21Rik	0	0	0	0	0	0	0	0	0	0	0	0	0	0	0	0	0	0	0	0	0	0	0	0.883552
2310050C09Rik	0	0	0	0.932727	0	0	0	0	0	0	0	0	0	0	0	0	0	0	0	0	0	0	0	0
2310057J18Rik	2.00069	0	0	0	2.13329	0	0	0	0	0	0	0	3.18337	0	0	0	0	0	0	0	0	0	0	0
2310057M21Rik	255.225	204.772	273.304	242.793	290.753	244.512	283.792	233.184	387.788	310.849	295.698	338.075	212.861	255.654	267.368	281.847	289.58	189.744	325.274	281.975	285.259	256.161	357.472	258.646
2310057N15Rik	0	0	0	0	0	0	0	0	0	0	0	0	0	0	0	0	0	0	0	0	0	0	0	0
2310061I04Rik	2255.05	1987.14	2109.13	2078.48	2244.23	1875.97	2184.57	2178.27	2511.25	2589.2	2279.75	2784.08	2591.67	2307.27	2241.9	2475.25	2109.67	1849.73	1876.67	1950.76	2239.12	2028.24	2354.13	2182.03
2310061N02Rik	0	0	0	0	0	0	0	0	0	0	0	0	0	0	0	0	0	0	0	0	0	0	0	0
2310065F04Rik	0	0	0	0	0	0	0	0	0	0	0	0	0	0	0	0	0	0	0	0	0	0	0	0
2310068J16Rik	11.2978	6.72262	6.64586	16.11	16.9996	10.0364	11.5304	4.41785	22.308	7.92168	7.21492	29.523	15.5142	12.4835	15.5692	16.5936	13.1464	14.6967	22.167	14.5319	12.2329	15.2612	13.8708	27.5241
2310069B03Rik	27.7754	25.5231	44.2068	28.8743	34.6185	45.3862	24.9686	29.2987	15.0524	19.8615	18.4752	17.2828	34.5219	35.9429	27.4298	26.7046	16.8416	21.3716	24.3928	18.0664	27.4732	45.4349	23.9438	39.2242
2310069G16Rik	79.7657	61.7076	43.5189	88.0159	61.5453	34.4876	84.4915	51.8458	102.989	111.49	64.1218	109.085	55.4861	50.9581	35.298	72.3877	101.455	60.4415	64.2893	68.3299	47.1904	81.5276	73.9393	80.6069
2310075C17Rik	5.25663	0.933335	0	10.3427	6.35009	9.18005	9.647	9.24712	2.66619	7.64143	2.58263	4.97145	1.58193	0	0	2.09076	0	1.89315	6.86571	0.823822	3.88657	5.92736	5.53364	0
2310079G19Rik	0	0	0	0	0	0	0	0	0	0	0	0	0	0	0	0	0	0	0	0	0	0	0	0
2310081J21Rik	0	0	0	0	0	0	0	0	0	0	0	0	3.14151	0	0	4.88935	0	0	0	0	0	6.22567	0	0
2400006E01Rik	0	0	0	0	0	0	0	0	0	0	0	0	0	0	0	0	0	0	0	0	0	0	0	0
2410002F23Rik	251.849	302.484	299.444	305.999	374.251	367.953	342.006	383.51	416.536	409.953	364.597	335.935	391.58	469.815	412.179	486.341	258.083	341.689	276.456	308.435	369.852	306.816	273.168	306.853
2410003L11Rik	0	0	0	0	1.06806	0	0	0	0	0	0	0	0	0	0	0	0	0	0	0	0	0	0	0
2410004B18Rik	345.571	290.277	362.195	362.756	368.588	373.924	333.758	306.067	425.349	362.955	360.091	417.595	384.111	402.179	365.434	425.5	321.224	344.304	326.818	288.146	368.996	358.863	366.027	414.95
2410004I01Rik	0	0	5.90834	0	3.19656	3.77888	6.02813	4.49457	0	1.89158	8.49193	6.04693	3.16352	2.29933	3.95202	5.82585	4.34104	4.80465	3.82395	0	5.76554	1.78111	10.984	0
2410004P03Rik	0	2.86497	0.941895	0.942714	4.26291	3.77408	0	0	0	6.20793	9.41053	8.29371	4.73959	3.45721	0.976941	2.75876	4.41453	6.84402	17.2778	3.25845	13.4117	13.6534	5.51493	8.0335
2410006H16Rik	52.5759	120.39	81.5981	79.1521	88.3669	108.487	100.558	94.7584	123.177	131.463	110.472	158.748	117.421	89.4769	110.483	88.5898	83.8508	86.0226	100.158	108.216	124.701	103.941	103.759	101.998
2410012E07Rik	0	0	0	0	0	0	0	0	0	0	0	0	0	0	0	0	0	0	0	0	0	0	0	0
2410015M20Rik	1485.98	1598.14	1543.69	1830.92	1647.3	1836.02	1609.9	1730.11	2000.78	1859.91	1812.15	2125.72	1635.29	2048.07	1828.56	1961.64	1631.06	1645.44	1739.94	2001.41	1959.28	1726	2032.65	1878.61
2410017I17Rik	0	0	2.83171	2.85634	0	0	1.74002	0	0	1.26727	0	0	0	1.16035	0	0	0	1.9635	0	0	0	0	0	0
2410018L13Rik	2.07019	3.84373	0	7.61954	14.958	1.25391	7.81721	3.71298	1.32769	8.77559	3.62703	1.20199	7.86845	3.43498	4.88846	9.51215	8.70772	5.82526	1.90392	4.86951	11.4105	5.40602	3.66437	5.28977
2410021H03Rik	0	0	0	0	0	0	0	0	0	0	0	0	0	0	0	0	0	0	0	0	0	0	0	0
2410022M11Rik	57.8031	88.2751	76.9214	65.3818	65.0163	82.2697	56.1639	91.9604	61.4839	79.4722	70.9743	69.4973	89.784	66.2253	82.3334	84.1135	45.9311	87.2692	58.6907	47.7388	78.9875	44.495	46.6293	64.5401
2410124H12Rik	0	0	0	0	0	0	0	0	0	0	0	0	0	0	0	0	0	0	0	0	0	0	0	0
2410131K14Rik	490.417	360.07	383.554	423.219	339.955	462.648	439.483	409.938	546.043	459.756	511.35	525.917	367.76	521.965	513.893	509.732	459.003	462.294	421.422	528.588	454.742	429.715	615.152	486.455
2410137M14Rik	17.578	12.3667	17.5578	13.3279	18.1063	26.4899	37.1372	22.535	26.6709	23.9119	14.7313	18.2064	17.3348	27.611	19.8043	17.4885	12.9494	13.5565	12.4309	7.34562	19.1711	5.34698	9.18233	8.86508
2410141K09Rik	0	0	0	0	0	0	0	0	0	0	0	0	0	0	0	0	0	0	0	0.807594	0.961989	0	0	0
2500002B13Rik	61.0678	61.0092	59.7804	117.571	59.2521	56.9276	81.7524	80.6166	138.859	87.9333	66.2332	95.3113	104.96	63.882	74.8258	79.7785	88.4329	48.5145	64.7532	85.9527	59.3336	91.4278	70.7252	63.8282
2500004C02Rik	38.2467	74.6727	42.9265	53.1312	52.6783	42.9251	86.9122	64.0333	79.0105	84.5326	57.8248	41.1086	85.7095	53.6187	59.8808	75.619	44.699	42.1325	53.3109	49.7228	58.5009	57.0171	53.7283	53.1576
2510002D24Rik	313.65	359.114	351.242	315.129	345.357	394.695	351.432	369.022	391.045	395.127	419.901	322.533	413.06	383.877	385.394	421.292	215.741	381.38	293.162	239.118	392.288	284.834	291.372	365.242
2510003B16Rik	3.09511	0	0	0	0	0	3.4725	0	1.31149	1.25186	0	0	0	2.28501	0	0	0	0	0	0	0	1.76982	1.86391	0.89598
2510009E07Rik	735.847	638.098	712.81	653.635	742.692	667.486	730.715	775.836	762.292	812.324	874.614	837.836	914.94	809.95	758.358	687.817	719.827	694.074	667.543	759.439	849.216	898.241	699.88	850.294
2510039O18Rik	1024.27	956.47	960.694	1043.58	1023.74	1221.48	1034.39	1034.42	1034.21	1184.94	1135.89	1147.71	1189.75	1175.62	1177.51	1162.18	928.471	930.593	1085.6	1116.09	1110.89	1105.38	1190.49	1138.27
2610001J05Rik	517.474	501.291	445.394	563.745	470.037	523.621	503.457	555.289	723.563	718.227	752.391	748.945	515.236	714.846	622.94	677.863	537.091	597.713	595.491	575.072	671.545	668.591	615.879	624.461
2610002M06Rik	250.956	221.932	264.264	250.128	276.822	262.474	289.963	270.132	355.892	374.123	397.398	386.341	408.505	302.644	334.542	307.333	217.615	273.267	222.631	255.516	278.128	283.873	240.063	302.176
2610005L07Rik	498.053	420.618	550.017	394.162	634.102	492.174	551.079	484.058	672.309	602.657	588.449	555.851	584.956	556.272	466.023	555.355	550.176	499.137	473.335	404.531	566.289	552.311	447.156	539.049
2610008E11Rik	515.717	380.437	468.794	385.967	422.904	355.759	434.453	343.819	684.777	464.351	500.73	466.221	464.447	363.391	202.805	308.506	386.966	449.465	398.718	310.937	455.381	389.82	375.402	450.322
2610016A17Rik	0	0	0	0	0	0	0	0	0	0	0	0	0	0	0	0	0	0	0	0	0	0	0	0
2610020C07Rik	1.03133	0.947116	9.08608	1.79672	2.11262	0	1.72102	3.84566	0	1.28499	1.32594	3.73372	0	7.00757	2.09566	12.3221	0	0	3.83936	2.41786	2.92265	6.05658	7.2972	1.76648
2610024D14Rik	0	0	0	0	0	0	0	0	0	0	0	0	0	0	0	0	0	0	0	0	0	0.905645	0	0
2610027K06Rik	5.16175	0.963195	5.7471	2.84853	9.63729	1.25385	5.18613	1.48993	8.06319	3.1435	3.6447	4.81162	4.74701	1.15495	13.6561	5.71801	2.18542	15.5789	6.63422	4.8614	5.73141	9.98289	3.66749	2.64776
2610028E06Rik	0	0	0	0	0	0	0	0	0	0	0	0	0	0	0	0	0	0	0	0	0	0	0	0
2610028H24Rik	4.11823	8.63927	2.86713	16.1211	3.2046	13.7979	19.9241	13.4383	14.7244	8.73606	13.3613	10.7699	18.9094	9.22008	15.6144	27.508	2.18472	7.82183	27.6006	12.1674	6.67794	11.7976	6.44425	8.86064
2610035D17Rik	65.0598	123.123	176.835	83.3019	165.615	119.474	146.258	134.071	145.275	184.806	169.513	101.132	104.418	233.17	214.567	205.91	76.4292	118.382	96.8285	117.568	97.504	146.191	85.0603	77.6842
2610035F20Rik	0	0	0	0	0	0	0	0	0	0	0	0	0	0	0	0	0	0	0	0	0	0	0	0
2610037D02Rik	0	0	5.94034	0	0	0	0.850332	2.99401	0	0.642151	0	1.23289	0	4.70307	0	0	0	0	0	1.62014	0.977176	0.88944	0	2.6652
2610042L04Rik	3.17112	2.88881	0	3.63993	2.10525	14.5821	10.3874	3.12887	13.8641	1.28896	10.8993	2.49947	0	1.17474	2.18964	0	0	6.71561	7.83373	2.446	4.93077	2.561	1.83777	8.92961
2610044O15Rik8	117.911	146.031	82.9617	111.85	138.978	106.209	88.6866	148.76	173.798	118.165	201.632	164.513	141.059	145.121	93.954	137.192	76.0195	157.735	92.5673	109.898	104.991	124.629	99.1991	115.376
2610203C22Rik	17.4335	23.3661	17.387	5.28355	31.0287	15.828	31.826	10.9999	15.1085	38.3944	20.6391	14.9412	35.7003	22.0915	17.5572	22.1426	14.4358	26.3538	5.97035	17.3405	15.8293	13.7289	40.0141	22.4745
2610206C17Rik	0	3.86534	0	1.89546	3.22909	6.32141	7.79377	2.22559	1.36037	1.28855	3.66253	0	1.60056	0	0	0	0	0	0	0	0.960706	4.48457	0	1.75949
2610301B20Rik	203.142	165.487	200.89	173.072	190.055	195.419	188.666	150.432	185.491	249.845	211.217	233.277	213.812	223.31	249.77	218.351	166.541	197.133	173.809	146.15	176.282	185.56	168.304	175.33
2610306M01Rik	91.9104	105.751	105.082	95.4721	134.38	125.667	99.4586	131.194	120.591	126.673	123.982	136.772	107.027	131.947	128.549	140.291	82.7458	93.5417	148.504	109.153	84.9859	107.869	127.139	124.482
2610307P16Rik	10.5377	1.95008	12.4414	8.12528	14.6401	12.547	16.6629	11.9071	8.13681	18.2307	11.1844	7.23049	10.9667	20.4882	9.32795	17.514	8.92553	7.68694	3.79255	8.13766	18.6907	5.23853	20.3771	3.61976
2610316D01Rik	0	0	0	0	0	0	0	0	0	0	0	0	0	1.16035	0	0	0	0	0.947474	0	0	0	0	0
2610318M16Rik	0	0	0	0	0	0	0	0	0	0	0	0	0	0	0	0	0	0	0	0.807594	0	0	0	0
2610318N02Rik	0	0	0	0.949075	2.1126	0	0	0	0	0	1.21044	2.3819	1.56774	0	0	0	0	0	0	3.25176	0	0	0	0
2610507B11Rik	15272	13153.7	13741	14123.5	13484.1	14021.6	13108.3	14430.5	15474.4	14898.4	16579.5	15255.2	14477	16257.5	15896.9	16207.3	12982.8	12439.5	12785.4	13027.5	12901.2	13749.5	14781.5	13518.9
2610507I01Rik	611.532	660.642	643.511	649.198	674.26	602.772	730.515	647.965	804.947	833.682	708.626	653.176	771.557	776.608	815.116	657.105	589.285	619.669	482.608	592.925	760.058	678.81	554.915	648.406
2610524H06Rik	4.1537	0.951723	7.93487	21.6521	13.8673	16.5278	11.2577	20.9118	26.9894	6.36535	11.1232	8.54328	9.55194	11.5366	7.00597	14.81	15.2557	21.9841	29.6924	14.6549	6.7151	14.9462	15.4438	22.0921
2610528A11Rik	2.04256	0	0.958533	2.84145	1.05753	1.25707	0	0	1.31795	0.625069	0	0	0	0	1.97054	0.959504	0	0.974839	0	1.64695	0	0.889616	0	0
2610528J11Rik	0	0	0	0	0	0	0	0	0	0	0	0	0	0	0	0	0	0	0	0	0	0	0	1.7671
2700012I20Rik	6.21554	7.57024	12.6612	0.95876	4.25574	3.7796	4.32883	12.0333	21.0284	11.8741	6.08042	14.459	12.5684	6.86379	6.91881	14.4386	0	9.68903	1.92655	4.91045	1.91226	3.55755	7.37493	17.8202
2700038G22Rik	12.2962	19.8557	13.8619	10.4076	31.8673	16.3668	24.8264	33.2511	13.5354	9.55814	23.6781	28.0476	20.5917	3.51522	6.93383	8.0028	13.1832	36.2713	23.6051	19.7606	9.57486	5.31089	34.3636	17.5237
2700046A07Rik	0	4.82395	0	0	3.21404	0	0	0	0	0	0	0	0	0	0	0	0	0	0	0	0	0	0	0
2700046G09Rik	46.3902	63.5794	50.4725	52.3291	66.5107	53.9384	46.5504	49.5428	50.2139	74.2135	70.6419	55.0339	55.1172	77.5478	44.2322	50.9576	44.9016	51.5121	46.5837	49.0104	55.4803	38.7379	42.3874	49.9028
2700049A03Rik	115.118	167.709	143.606	104.604	164.566	121.669	165.883	115.291	176.563	193.082	215.709	160.396	164.375	120.938	172.634	147.621	182.068	139.896	138.122	159.53	155.118	180.548	143.481	167.631
2700054A10Rik	6.29635	17.9439	13.2321	22.1064	5.42289	12.7363	22.6423	16.7962	16.4035	33.4886	21.0302	22.0795	34.2509	14.0966	25.8714	17.0757	12.7239	9.74507	14.2811	31.9135	16.9187	12.8107	17.5407	9.79594
2700062C07Rik	76.762	97.0554	120.334	76.5649	107.704	82.3783	105.126	82.5551	102.193	118.67	125.058	113.518	103.179	111.859	83.8874	133.773	73.6712	89.4086	116.686	89.6423	80.6709	92.8704	90.4197	111.4
2700069I18Rik	0	0	0	0	0	0	0	0	0	0	0	0	0	0	0	0	0	0	0	0	0	0	0	0.883552
2700070H01Rik	6.19788	0.95677	3.90843	4.68142	0	1.26858	2.57791	0.752154	0	6.98768	1.25533	12.2239	4.75092	19.7112	2.00547	4.93085	10.7541	4.83338	1.90382	0	3.85846	6.24523	2.74185	3.52936
2700081O15Rik	694.289	651.794	717.848	567.474	791.003	813.823	829.664	784.409	890.619	797.162	962.673	862.718	896.1	997.804	908.672	1000.02	675.706	732.719	692.528	691.305	813.807	823.345	763.375	766.444
2700089I24Rik	0	0	0	0	0	0	0	0	0	0	0	0	0	0	0	0	0	0	0	0	0	0	0	0
2700097O09Rik	140.592	142.616	125.374	101.24	163.289	178.996	114.767	128.481	252.241	212.217	141.129	217.839	223.641	198.474	188.393	124.766	79.0805	160.613	162.019	124.347	133.308	167.229	129.969	142.439
2700099C18Rik	0	0.94771	3.06524	0.919773	6.36663	11.6029	4.30679	3.00443	5.52493	8.39275	9.00756	4.97302	1.60137	6.95612	5.17391	11.3109	6.45464	10.4181	8.65046	1.62697	11.493	0	7.16505	1.74878
2810001G20Rik	110.881	85.7655	81.2667	94.259	85.1904	95.1382	94.4876	121.103	147.618	107.567	82.2455	154.944	93.5777	115.292	134.285	102.449	52.4052	88.5266	115.203	83.133	101.955	101.931	114.79	154.303
2810002D19Rik	128.211	73.2476	85.3406	101.727	107.207	110.743	106.682	117.021	136.682	130.567	122.323	145.828	76.6209	90.7574	118.219	114.912	68.8724	79.5248	78.681	89.3877	124.445	114.4	96.1304	89.151
2810004N23Rik	1090.64	1203.32	1008.62	1089.5	1194.83	1267.09	1223.91	1174.67	1444.61	1349.27	1120.1	1367.78	1343.65	1264.27	1398.69	1227.88	1143.81	1293.77	1166.15	1170.46	1278.86	1291.88	1263.63	1248.08
2810006K23Rik	272.498	335.722	333.508	321.272	378.79	329.505	320.161	285.474	395.877	407.371	388.217	385.788	397.89	375.394	376.281	354.666	318.704	342.517	311.519	305.539	350.913	328.409	357.985	305.78
2810013P06Rik	243.829	224.305	318.65	231.242	266.84	223.794	303.319	276.159	323.666	366.139	300.264	308.648	325.369	254.685	284.203	272.29	175.365	238.834	243.872	276.429	267.553	286.653	237.721	268.848
2810021J22Rik	76.5024	103.454	110.292	58.2979	93.6009	103.296	72.2076	92.1096	109.388	96.6429	98.5511	107.783	88.8832	117.334	99.1287	92.5616	60.2732	76.3175	82.1798	82.1921	119.226	105.898	93.1419	90.0757
2810025M15Rik	297.842	452.272	321.534	323.678	345.63	428.719	381.417	383.65	506.92	510.151	527.758	518.544	376.748	519.953	443.83	482.225	477.011	393.894	427.867	359.644	405.635	437.796	423.991	432.456
2810029C07Rik	7.25081	7.68576	14.4981	13.3085	12.8245	17.6143	24.985	32.8639	12.1001	15.2112	2.44325	24.2454	14.2707	13.8644	14.7527	7.74727	8.70023	12.5469	11.3778	15.461	13.4366	14.4016	16.4176	10.5761
2810032G03Rik	0	0	0	0	0	2.53271	0	0.743861	2.70851	3.82522	1.24299	1.22574	0	6.95786	1.00405	0	4.32556	0	0.951099	3.24455	7.731	0.883851	0.911508	0
2810047C21Rik1	44.2778	23.9174	70.2679	54.0027	67.0051	83.5982	48.3089	28.7674	23.5525	74.2819	60.9986	36.1226	79.6351	44.2419	76.9493	69.9756	58.4145	69.562	62.6718	90.0603	69.1232	78.7919	61.2438	76.2509
2810049E08Rik	0	0	0	0	0	0	0	0	0	0	0	0	0	0	0	0	0	0	0	0	0	0	0	0
2810403D21Rik	3.1224	4.70475	0	0.861489	4.18386	4.19083	14.1174	0	6.9606	1.27542	4.47373	3.77297	16.8729	1.15984	5.83869	11.0516	2.02578	0.997916	0	1.67598	5.06816	3.3177	2.82452	0.911799
2810404M03Rik	0	0	0	0	0	0	0	2.23894	0	0	0	0	0	0	0	0	0	0	0	0	0	0	0	0
2810405F15Rik	0	0	0	0	0	0	0	0	0	0	0	0	0	0	0	0	0	0	0	0	0.961989	0	0	0
2810408A11Rik	6.8971	13.0204	11.0009	3.67503	14.6002	3.98192	17.8319	11.3241	6.87715	5.85757	27.4708	2.48963	13.0308	14.244	4.65034	4.90402	8.2575	10.8904	2.9461	4.9822	7.1621	3.68979	4.66474	7.25
2810408I11Rik	0	0	4.01405	1.79111	1.0391	0	3.43619	1.54943	0	1.27906	0	0	3.17854	0	0	0	4.25677	0	0	1.67376	0	0.874817	4.7271	4.57774
2810410L24Rik	43.0648	49.1633	32.948	36.9687	51.2397	56.2271	32.3407	37.8273	37.3588	39.4697	48.0246	54.3992	43.9091	49.4662	47.3315	48.3116	17.6321	47.1893	39.0543	42.0754	70.2324	26.5232	31.4207	33.7316
2810414N06Rik	50.8882	65.6333	50.6786	50.4235	58.1755	32.9115	57.7278	58.2239	92.3202	88.8725	43.3938	47.8701	47.6524	103.893	73.1478	102.871	16.8434	48.8421	39.2201	47.4817	40.5871	47.8558	59.6621	50.2422
2810429I04Rik	0	0	0	0.932727	0	0	0	0	0	0.644127	0	0	0	0	0	0	0	0	0	0	0.961989	0	0	0
2810433D01Rik	1.03413	0	0	0	0	2.53502	0	0	0	1.90208	0	4.87038	1.58143	1.15575	8.99413	3.92903	10.797	8.70133	0	2.44353	0	6.24005	7.31134	1.76786
2810442N19Rik	0	0	0	0	0	0	0	0	0	0	1.23668	0	0	0	1.9686	0	0	0	0	0	0	0.886275	0	1.7733
2810454H06Rik	7.18952	24.5484	24.2161	7.99933	9.42863	22.2267	11.1829	24.6644	4.16172	15.9968	8.0451	9.89198	22.0746	26.8195	12.7701	12.3927	25.3642	10.6881	6.85448	8.16191	13.7797	13.8596	14.721	20.5329
2810459M11Rik	0	0	0	0	0	1.26009	0	0.747561	1.3365	0	2.47201	0	0	5.73376	0	0	0	0	1.91865	0	0	0	0	0.886007
2810468N07Rik	8.22861	15.3015	9.66461	23.7312	12.8389	37.6544	21.5431	15.009	18.8125	19.9964	24.617	15.7142	33.0513	24.2169	26.5084	16.2905	21.6041	25.4624	18.9946	27.5335	27.6409	31.5997	15.7211	10.6227
2810471M01Rik	0	0	0	0	0	0	0	0	0	0	0	0	0	0	0	0	0	0	0	0	0	0	0	0
2900005J15Rik	4.13492	14.428	24.0915	23.6146	29.8882	22.6851	33.6895	11.9418	32.3686	29.7314	28.1803	18.1163	30.112	30.055	21.6771	24.1654	19.6261	12.5746	45.5779	18.6966	45.1225	33.3523	25.5229	47.637
2900009J06Rik	10.3069	3.72869	13.8844	5.66811	4.19122	7.65979	12.1811	12.2553	7.84981	14.3618	3.77321	4.8658	0	7.96558	5.10007	8.9009	2.1173	6.80537	4.9013	4.14175	6.73818	1.73585	11.0821	16.9915
2900011O08Rik	0	0	0	0	0	0	1.72612	0	0	0	0	0	11.0444	1.17035	0	0	2.1776	0	0	0	0	0	5.60393	3.58559
2900026A02Rik	1198.6	1107.85	1184.58	1272.05	1412.13	1258.48	1434.49	1239.82	1496.93	1609.37	1677.05	1629.54	1782.48	1865.66	1546.01	1761.64	1312.53	1395.92	1309.97	1495.23	1726.3	1604.62	1278.94	1646.45
2900040C04Rik	0	0	0	0	0	0	0	0	0	0	0	0	0	0	0	0	0	0	0	0	0	0	0	0
2900041M22Rik	5.15932	8.59228	7.80413	0.943603	16.0168	1.26216	19.8026	6.0187	12.1162	12.6054	4.95779	9.71501	23.6908	19.6328	43.6397	16.5151	15.1212	14.6087	14.2969	6.49704	21.0909	25.1069	3.68199	10.6178
2900052L18Rik	89.6529	95.7294	132.044	118.924	95.3694	63.9991	107.965	94.4477	137.055	143.039	145.194	128.854	161.806	148.296	131.654	92.7397	80.9485	94.377	112.297	81.5877	116.74	101.815	79.5151	110.947
2900052N01Rik	37.061	20.7551	37.7568	53.0679	26.1764	27.5372	38.5717	47.1921	51.5201	61.9329	79.5288	76.0392	63.1221	78.3841	48.1476	50.188	16.8299	24.2288	77.3197	25.3244	26.6908	17.2778	15.6213	44.5742
2900055J20Rik	0	1.89955	0	0	0	0	0	0	4.01978	0	0	0	0	0	0	0	0	0	0.968203	0	0	2.65988	0	0.902504
2900057B20Rik	0	0	0	0	0	0	0	0	0	0	0	0	0	0	0	0	0	0	0	0	0	0	0	0
2900060B14Rik	0	4.8195	0	0	0	0	0.874281	0.761138	0	0.634378	0	3.67241	0	6.9008	1.01664	0	0	0	0	0.81208	6.79772	9.56369	0.917225	0
2900076A07Rik	5.16818	8.4946	7.0374	4.6018	14.7819	9.01376	11.1882	12.969	23.0878	11.5046	15.4723	16.0426	14.2138	11.5646	7.2407	11.1704	6.39035	12.5296	12.5977	4.91244	8.76755	13.9335	5.49964	19.5534
2900079G21Rik	0	0	0	0	0	0	0	0	0	0	0	3.62478	3.17812	0	3.9437	0	0	0	0	0	0	0	2.5156	0
2900092C05Rik	0	0	0	0	0	0	0	0	0	0	0	0	0	0	0	0	0	0	0	0	0	0	0	0
2900092D14Rik	0	0	0	0	0	0	0	0	0	0	0	0	0	0	0	0	0	0	0	0	0	0	0	0
2900093K20Rik	15.5418	15.0478	21.6542	14.1821	17.957	19.1291	18.2756	17.2765	21.1559	26.8827	16.0051	18.0855	9.45779	14.883	12.047	9.76749	13.0747	19.2228	5.84383	2.45862	12.4849	16.5956	29.2397	15.2132
2900097C17Rik	7110.73	7403.84	6283.73	6073.01	7314.83	7045.81	6674.35	6862.66	9167.59	8875.18	8871.16	8939.57	8870.03	8082.32	7788.27	7078.97	6609.51	6757.17	6495.13	6563.63	6767.85	7178.74	6919.14	6448.05
3000002C10Rik	22.6733	46.8216	31.8253	36.2331	65.0938	41.4044	35.3509	32.3102	50.6961	42.5292	35.5561	67.6607	61.2786	42.5869	56.0193	38.3631	56.0778	38.1	50.4377	28.4705	54.4056	42.4188	36.0277	46.9339
3010001F23Rik	0	0	0	0	0	0	0	0	7.9228	5.75465	0	0	0	1.13522	4.95999	0	2.18146	0	6.78427	0.822781	1.92309	3.50499	0	4.50541
3010003L21Rik	1.03583	8.76961	5.6637	6.70482	2.13039	2.49736	7.04709	4.41802	2.6466	6.76836	4.76342	4.70942	4.69903	2.28939	4.81987	8.28436	2.21765	0	0	5.67486	5.67324	1.82558	0.919841	6.20975
3100003L05Rik	0	0	0	0	0	0	0	0	0	0	0	0	0	0	0	0	0	0	0	0	0	0	0	0
3110009E18Rik	15.8344	28.6729	25.2529	19.0047	33.299	10.7904	19.0739	19.6132	25.1711	18.7111	27.4686	35.9663	18.6682	15.6861	19.2333	25.5484	22.6058	26.3407	21.6174	24.2296	10.9104	18.4592	30.2035	21.4153
3110009F21Rik	0	0	0	0	0	0	0	0	0	0	0	0	0	0	0	0	0	0	0	0	0	0	0	0
3110015C05Rik	0	0	0	0	0	0	0	0	0	0	0	0	0	0	0	0	0	0	0	0	0	0	0	1.7671
3110021A11Rik	0	5.72728	6.62301	0.960524	4.24194	1.24935	7.05192	4.45224	7.77373	2.43939	14.2726	2.35626	1.55056	4.53183	7.76031	2.76891	0	2.94206	1.93473	3.26243	5.66614	5.40606	13.9103	2.67674
3110039I08Rik	170.27	169.008	201.578	155.441	189.592	133.329	222.943	178.849	191.613	252.943	244.757	267.127	321.425	169.86	187.49	207.448	234.212	237.99	236.92	160.898	210.732	223.674	224.7	227.118
3110039M20Rik	0	0	0	0	0	0	0.863061	0	0	0	0	0	0	0	0	0	0	0	0	0	0	0	0	0
3110040N11Rik	120.922	105.692	99.5957	114.275	100.755	121.944	140.724	110.981	160.166	172.155	135.586	164.657	107.068	146.771	115.236	163.109	157.961	132.226	89.4403	111.531	139.158	125.322	144.696	153.913
3110045C21Rik	4.13331	9.44847	5.07138	8.20042	17.9553	37.6024	12.0387	15.9522	12.4287	12.867	18.3244	17.3935	20.704	10.464	19.8339	17.523	2.13519	14.3388	21.2883	21.991	15.6121	22.4188	13.6186	8.85934
3110056K07Rik	98.0919	104.31	85.4408	70.2447	124.375	99.5223	99.2714	118.617	114.99	102.845	118.186	142.585	126.962	76.7107	95.4579	111.545	67.2957	82.0665	121.402	92.4106	95.695	127.777	114.779	92.8465
3110070M22Rik	16.4663	18.1826	21.9062	24.8499	20.2454	7.50745	24.4075	26.8332	18.4933	25.3528	25.2975	19.0715	25.0279	5.7315	34.0614	42.2444	26.2122	43.0601	11.4828	6.50731	25.6531	47.9875	35.1867	33.7652
3110082I17Rik	77.0493	88.4562	125.465	145.766	124.753	97.8227	116.515	92.4313	124.481	126.232	122.583	108.497	98.9956	142.812	133.6	124.73	111.477	116.529	134.369	107.066	135.47	110.038	128.789	86.0727
3110082J24Rik	0	0	0	0	0	0	0	0	0	0	0	0	0	0	0	0	0	0	0	0	0	0	0	0
3110099E03Rik	0	0	0	0	0	0	0	0	0	0	0	0	0	0	0	0	0	0	0	0	0	0	0	0
3200001D21Rik	0	0	0	0	0	0	0	0	0	0	0	0	0	0	0	0	0	0	0	0	0	0	0	0
3300002I08Rik	2.08019	2.83579	3.91737	1.9323	0	0	6.90891	3.0178	2.61026	4.99812	2.44571	6.05579	14.0647	2.28365	5.97293	0.96918	8.58638	3.87059	9.6655	5.76283	0.957192	7.96579	11.0888	2.67463
3300002P13Rik	0	1.91771	1.95802	0	0	1.26428	3.45244	2.25431	1.33892	4.42592	6.1427	3.64726	7.91347	10.3831	0	2.92092	2.16899	0	0	0	0	0	0.913973	1.76638
3300005D01Rik	0	0	0	0	1.78266	0	0	0.894294	1.57725	0.756105	0	1.01965	1.88976	0	0	0	10.4304	0	4.5911	2.29012	2.06476	4.71953	2.96249	2.86636
3425401B19Rik	5191.88	4651.96	5066.81	5553.51	5342.06	4828.52	5085.27	4855.4	5252.47	6043.84	4906.59	6070.87	6229.68	5853.16	6220.19	6002.97	7586.8	6290	4829.81	6530.51	6174.39	6161.37	6605.76	5819.77
3632454L22Rik	0	0	0	0	0	0	0	0	0	0	0	0	0	0	0	0	0	0	0	0	0	0	0	0
3830403N18Rik	51.9523	26.2647	8.98932	1.55953	9.79086	14.4064	12.6258	23.2029	17.0562	17.7483	19.351	32.4204	33.3824	26.8368	17.3678	26.6498	18.9771	18.7996	13.1823	8.31798	23.1369	5.34746	13.501	10.308
3830406C13Rik	348.823	362.445	328.918	364.497	390.523	323.972	357.751	318.894	494.739	436.885	429.506	467.279	427.736	396.006	320.768	387.269	268.212	366.969	364.93	312.543	411.696	330.706	381.388	435.238
3830408C21Rik	24.9002	24.9018	15.7852	17.8104	40.6798	26.6448	40.4984	32.1478	23.1125	42.2357	23.5111	28.0624	33.5331	9.26246	17.9567	43.3749	10.9014	25.9205	23.8262	18.6751	22.1465	19.5454	16.3515	30.8566
3830417A13Rik	0	0	0	0	0	0	5.17836	0	0	0	0	0	0	0	0	0	0	0	0	0	0	1.81129	0	0
3830432H09Rik	0	0	0	0	0	0	0	0	0	0	0	0	0	0	0	3.92147	0	0	0	0	3.85043	0.894101	0	0
3930402G23Rik	0	0	0	6.52909	1.06746	2.50751	2.57991	2.23681	0	1.2593	0	1.20649	1.58245	0	0	0.962131	0	0.986428	0.959928	0.755541	0	1.80975	5.48398	0
4430402I18Rik	245.562	272.441	289.702	221.317	276.889	183.886	286.648	299.844	347.104	358.889	395.177	311.803	310.116	407.201	311.505	301.913	190.001	168.339	220.753	182.65	195.637	192.633	148.944	193.664
4631405J19Rik	94.7606	83.1056	118.461	87.558	107.911	100.381	125.363	115.372	176.024	142.896	166.936	174.048	154.278	181.631	109.604	153.429	82.6639	142.745	121.088	109.62	108.639	156.268	142.106	129.526
4632404H12Rik	112.471	92.5321	121.787	113.689	106.961	108.896	122.525	118.281	117.356	151.371	164.475	139.5	145.257	127.587	111.368	134.446	98.6888	90.2297	90.6576	96.8492	112.362	125.517	119.409	93.1646
4632415L05Rik	284.447	297.802	255.549	221.775	350.084	314.63	353.865	265.841	362.182	384.444	320.082	337.378	278.307	339.954	339.712	317.367	332.699	272.263	245.794	321.05	238.085	291.865	296.169	276.648
4632427E13Rik	4.14431	8.49903	2.88277	8.61322	3.17593	1.26291	6.10506	2.99688	5.19918	6.79217	7.20286	7.10338	26.6774	4.55476	1.96979	7.57421	10.9949	2.91155	7.81104	6.56407	6.69528	6.21871	7.34966	11.6891
4632428C04Rik	130.85	121.238	95.4556	103.629	140.046	129.566	135.252	175.3	259.971	222.465	167.516	175.479	169.111	221.193	177.046	161.898	114.823	119.975	123.114	113.409	75.6473	96.0453	106.577	106.771
4732414G09Rik	0	0	0	0	0	0	0	0	0	0	0	0	0	0	0	0	0	0	0	0	0	0	0	0
4732416N19Rik	0	0	0	0	0	0	0	0	0	0	0	1.21377	0	3.45459	0	0	0	0	0	0.808444	0	0	0	1.78601
4732471J01Rik	1.59989	4.23219	10.035	0.764211	15.7151	3.64647	8.64138	1.62735	3.47348	5.23434	14.4835	6.45592	7.43785	13.855	9.52382	1.38013	7.10549	5.25906	8.3442	0.549951	2.93508	1.80688	3.21021	7.34104
4732490B19Rik	0	0	0	0	0	0	0	0	0	0	0	0	0	0	0	0	0	0	0	0.807594	0	0	0	0
4732491K20Rik	86.9816	118.468	130.481	135.463	158.495	114.906	154.776	160.515	183.957	153.811	119.684	129.19	186.488	174.143	144.296	160.372	117.494	105.056	119.09	78.6168	132.806	142.857	149.092	148.536
4831407H17Rik	0	0	0	0	0	0	0	0	0	0	0	0	0	0	0	0	0	0	0	0	0	0	2.74059	0
4831440E17Rik	68.985	67.2154	66.353	41.5641	57.6707	36.6989	81.5156	69.226	77.0542	99.6003	64.6261	99.8712	118.705	55.0649	51.2666	75.3879	65.3962	106.086	66.2067	65.1957	63.9801	54.4537	58.486	68.3455
4833411C07Rik	5.1453	0	0.962438	0.949284	4.25479	2.50992	0.861604	0.748917	6.67275	6.27306	6.12325	2.41741	0	6.90097	5.90003	0.961522	6.48936	0.971973	0.952911	3.258	5.73637	0	0	0
4833412C05Rik	2.09459	0.959859	0	3.75133	1.06748	3.87343	1.73184	0	0	10.8546	0	2.46201	6.31435	6.92406	1.01631	6.9964	17.1853	3.85291	7.70867	6.52034	5.82326	6.13379	8.22086	7.97991
4833415N18Rik	0	0	0	2.79818	0	0	0	0	0	0	0	0	0	0	0	0	0	0	0	0	0	0	0	0
4833417C18Rik	13.4476	0	15.8791	12.972	4.24527	8.91259	7.73176	3.00422	6.81857	5.77043	5.03371	13.4977	15.8904	10.439	7.08672	15.99	8.62911	12.492	7.65838	5.70044	10.6289	12.378	19.1222	1.76596
4833418N02Rik	19.5798	12.5122	8.68844	15.848	5.30637	10.1133	7.84954	23.1845	10.7486	13.2039	18.4277	16.8494	9.40511	24.2064	22.8001	24.9921	6.50432	7.79194	21.0579	19.5029	19.1683	22.528	6.42506	9.7354
4833419F23Rik	22.8633	22.7719	14.8489	24.5341	35.1646	21.6193	31.0155	24.0509	24.1722	51.5639	23.5577	34.2168	28.6194	32.3086	33.0559	22.7324	10.8496	30.6989	25.9125	28.5614	18.3423	23.7618	14.5917	34.5504
4833420G17Rik	299.058	416.589	330.785	355.831	404.87	321.628	385.568	377.531	480.051	497.521	508.892	393.522	396.572	444.916	385.981	486.976	473.626	446.309	438.14	412.783	412.601	407.307	348.632	381.253
4833422C13Rik	31.6931	34.6921	32.1771	39.3894	35.7266	28.3692	42.8526	38.4066	29.1215	45.3591	31.5885	55.9647	54.835	39.1071	36.9681	37.6459	54.1803	39.5454	39.7504	25.6784	43.4459	35.4384	35.5774	44.2132
4833422M21Rik	0	0	0	0	0	0	0	0	0	0	6.18338	0	0	0	0	0	0	2.89904	0	0	0	0	0	0
4833423E24Rik	0	0	0	0	0	0	0.863061	0	0	0	0	0	4.77505	0	0	0	0	0	0	0	0	0	0	0
4833427F10Rik	4.13645	5.74962	2.9072	5.68213	5.32812	2.52277	6.89162	4.49849	8.07821	3.16227	2.46773	13.3727	3.1627	1.15595	17.8193	11.6772	0	7.72986	22.7827	7.31886	3.84353	26.9102	18.2929	22.0643
4833427G06Rik	0	0	0	0	0	0	0	0	0	0	0	0	0	0	0	0	0	0	0	3.23038	0	0.884644	2.80566	0
4833428L15Rik	0	0	0	0	0	0	0	0	0	0	0	0	0	0	0	0	0	0	0	0	0	0	0	0
4833438C02Rik	34.9946	44.2641	21.7021	42.6694	41.5563	43.3767	46.5927	39.6213	40.4917	59.0173	34.5536	58.0014	48.114	40.1448	59.94	53.5558	56.0925	48.919	48.571	47.5523	64.8324	42.4666	46.1325	26.7914
4833439L19Rik	3161.52	3066.04	3013.24	3107.42	3392.66	3075.7	3420.3	3241.73	3914.7	3860.71	3456	3732.48	3520.89	3622.05	3738.5	3717.14	3198.46	2919.82	3033.22	3474.55	3486.59	3479.13	3496.32	3355.28
4921501E09Rik	0	0	0	0	0	0	0	0	0	0	0	0	0	0	0	0	0	0	0	0	0	0	0	0
4921504A21Rik	74.1848	66.0672	91.6905	53.3022	78.5618	76.3672	109.226	56.2347	108.989	97.3973	108.913	123.068	134.281	131.672	93.2624	102.804	53.0361	102.613	78.138	52.5763	74.5647	58.4001	51.9934	75.2573
4921504E06Rik	0	0	0	0	0	0	0	0	0	0	0	0	0	0	3.9372	0	0	0	0	0	0	0	0	0
4921507G05Rik	0	0	0	0	0	0	0	0	0	0	0	0	0	0	0	0	0	0	0	0	0	0	0	0
4921507P07Rik	7.25046	8.58564	12.0059	12.8091	12.7318	20.581	8.59416	21.1285	26.2407	20.571	12.8104	17.2993	20.7008	21.0022	13.2969	22.2442	19.3653	16.312	12.4472	9.74205	20.3807	16.6849	14.5435	7.93938
4921508D12Rik	0	0	0	0	0	0	0	0	0	1.26727	0	0	1.59168	0	0	0	0	0.964004	0	0	0	0	0	0
4921509C19Rik	0	0	0	0	0	0	0	0	0	0	0	0	0	0	0	0	0	0	0	0	0	0	0	0
4921509O07Rik	0	0	0	0	0	0	0	0	0	0	0	0	0	0	0	0	0	0	1.89495	0	0	0	0	0
4921511C10Rik	0	0	0	0	0	3.78659	0	0	4.04282	0	1.2295	0	1.58253	0	0	0.971255	0	0	0	3.26926	0	0.897087	0	0
4921511C20Rik	0	0	0	0	0	0	0	0	0	0	0	0	0	0	0	0	0	0	0	0	0	0	0	0
4921511I17Rik	0	0	0	0	0	0	0	0	0	0	0	0	0	0	0	0	0	0	0	0	0	0	0	0
4921511M17Rik	0	0	0	0	0	0	0	0	0	0	0	0	0	0	0	0	0	0	0	0	0	0	0	0
4921513H07Rik	0	0	0	0	0	0	0	0	0	0	0	0	0	0	0	0	0	0	0	0	0	0	0	0
4921513I03Rik	0	0	0	0	0	0	0	0	0	0	0	0	0	0	0	0	0	0	0	0	0	0	0	0
4921515E04Rik	0	0	0	0	0	0	0	0	0	0	0	0	0	0	0	0	0	0	0	0	0	0	0	0
4921517D22Rik	0	0	0	0	0	0	0	0	0	0	0	0	0	0	0	0	0	0	0	0	0	0	0	0
4921518K17Rik	0	0	0	0	0	0	0	0	0	0	0	0	0	0	0	0	0	0	0	0	0	0	0	0
4921524J17Rik	246.319	396.378	318.992	336.106	353.572	439.976	359.464	362.087	389.53	367.04	369.861	378.347	419.771	377.142	356.968	332.613	261.477	324.012	318.106	374.574	380.323	418.128	382.106	436.624
4921524L21Rik	0	0	0	0	0	3.78659	0	0	0	0	4.97692	0	0	0	0	0	0	0	0	0	0	0	0	0
4921525O09Rik	0	0	0	0	0	0	0	0	0	0	0	0	0	0	0	0	0	0	0	0	0	0	0	0.883552
4921529L05Rik	1.0317	0	0	0	0	0	0	0	0	0	0	0	0	0	0	0	0	0.960741	1.9194	0	0	2.71694	0	0
4921530L21Rik	0	0	0	0	0	0	0	0	0	0	0	0	0	0	0	0	0	0	0	0	0	0	0	0
4921531C22Rik	100.413	86.216	93.5122	109.726	127.968	72.4955	131.555	113.208	109.696	139.336	122.026	127.661	141.151	106.094	88.3051	104.052	95.3622	97.5499	90.052	83.6443	125.104	95.0366	80.3325	128.934
4921531P14Rik	0	0	0	0	0	0	0	0	0	0	0	0	0	0	0	0	0	0	0	0	0	0	0	0
4921533I20Rik	0	0	0	0	0	0	0	0	0	0	0	0	0	0	0	0	0	0	0	0	0	0	0	0
4921534H16Rik	0	0	0	0	0	0	0	0	0	0	0	0	0	0	0	0	0	0	0	0	0	0	0	0
4921536K21Rik	21.7044	19.2349	9.67652	10.366	24.5357	18.9289	10.3271	19.4875	23.0127	13.3289	23.5027	23.1021	23.739	17.3757	18.8176	33.1285	21.6103	14.5237	10.4228	19.5163	10.5787	17.1232	28.3221	20.2574
4921539E11Rik	0	0	0	0	0	0	0	0	0	0	0	0	0	0	0	0	0	0	0	0	0	0	0	0
4922502B01Rik	0	0	0	0	0	0	0	0	0	0	0	4.83304	0	0	0	0	0	0	0	0	0	0	0	0
4922502D21Rik	0	0	0	0	0	0	0	0	0	0	0	0	0	0	0	0	0	0	0	0	0	0	0	0
4922502H24Rik	0	0	0	0	0	0	0	0	0	0	0	0	0	0	0	0	0	0	0	0	0	0	0	0
4922502N22Rik	0	0	0	0	0	0	0	0	0	0	0	0	0	0	0	0	0	0	0	0	0	0	0	0
4930401C15Rik	0	0	0	0	0	0	0	0	0	0	0	0	0	0	0	0	0	0	0	0	0	0	0	0
4930401O10Rik	0	0	0	0	0	0	0	0	0	0	0	0	0	0	0	0	0	0	0	0	0	0	0	0
4930401O12Rik	0	0	0	0	0	0	0	0	0	0	0	0	0	0	0	0	0	0	0	0	0	0	0	0
4930402F06Rik	0	0	0	0	0	0	0	0	0	0	0	0	0	0	0	0	0	0	0	0	0	0	0	0
4930402F11Rik	0	0	0	0	0	0	0	0	0	0	0	0	0	0	0	0	0	0	0	0	0	0	0	0
4930402H24Rik	2010.13	2029.57	2195.32	2090.13	2329.6	2192.9	2389.23	2273.4	2497.31	2628.27	2799.62	2553.39	2714.24	2559.82	2709.46	2532.5	1974.02	2210.91	2234.49	2280.62	2584.59	2393.68	2528.8	2420.61
4930402K13Rik	0	0	0	0	0	0	0	0	0	0	0	0	0	0	0	0	0	0	0	0	0	0	0	0
4930404A05Rik	0	0	0	0	0	0	0	0	0	0	0	0	0	0	0	0	0	0	0	0	0	0	0	0
4930404H11Rik	0	3.78095	6.88706	2.86179	0	5.05514	2.58963	1.49921	6.6341	4.44607	1.22534	1.21997	7.90347	4.58885	4.98503	0.982282	0	0.956535	0.958758	0.819518	1.91748	1.76503	0.913331	6.20058
4930404I05Rik	0	0.956906	0	0.940267	0	0	0	0	0	0	0	0	0	0	0	0	0	0	0	0	0	0	0	0
4930404N11Rik	7.29079	0.964738	7.5702	0	0	0	0.896032	5.94691	0	0	0	0	0	1.18854	0	1.88425	0	0	0	0	0	0	0	0
4930405A10Rik	0	0	0	0	0	0	0	0	0	0	0	0	0	0	0	0	0	0	0	0	0	0	0	0
4930405A21Rik	9.2581	2.86067	4.78016	0	7.46891	1.25908	6.09179	6.75962	6.62572	2.48819	9.73472	2.40072	1.565	4.58444	0.979782	0	2.16743	3.90063	2.87004	11.4119	6.6805	0.9012	0.922517	0
4930405D11Rik	0	0	0	0	0	0	0	0	0	0	0	0	0	0	0	0	0	0	0	0	0	0	0	0
4930405J17Rik	1.0317	0	0	0	0	0	0	0	0	0	0	0	0	0	0	0	0	0	0	0	0	0	0	0
4930405L22Rik	0	0	0	0	0	0	0	0	0	0	0	0	0	0	0	0	0	0	0	0	0	0	0	0
4930405O22Rik	0	0	0	0	0	0	0	2.98525	0	0	0	1.20826	3.11194	0	0	4.93581	2.14069	0	0	0.817072	0	0	0	0
4930406D18Rik	0	0	0	0	0	0	0	0	0	0	0	0	0	0	0	0	0	0	0	0	0	0	0	0
4930407G08Rik	0	0	0	0	0	0	0	0	0	0	0	0	0	0	0	0	0	1.94628	0	0	0	0	0	0
4930407I10Rik	1.02271	0	0	4.70466	0	0	0	0	0	0.633634	0	0	0	0	0	0	0	0	0	0	0	0.905645	0	0
4930407I19Rik	0	0	0	0	0	0	0	0	0	0	0	0	0	0	0	0	0	0	0	0	0	0	0	0
4930412B13Rik	0	0	0	0	0	0	0	0	0	0	0	0	0	0	0	0	0	0	0	0	0	0	0	0
4930412C18Rik	6.19437	34.2368	29.0692	21.747	38.0129	23.2779	26.5717	24.4388	38.6752	22.5045	28.7797	16.0832	47.5585	34.9822	34.3779	37.7915	10.6457	28.9837	13.5301	21.1855	33.2613	11.3836	24.7058	31.0189
4930412O13Rik	2.06566	9.66601	10.5344	12.282	6.42951	1.25601	3.45758	9.6544	0	5.05217	3.64313	4.81133	3.18031	4.63563	2.92684	6.70047	6.58761	3.87837	7.56336	8.89876	12.457	6.35082	3.64519	7.92972
4930413E15Rik	0	0	0	0	0	0	0	0	0	0	0	0	0	0	0	0	0	0	0	0	0	0	0	0
4930413F20Rik	0	3.8387	0.968508	0	0	0	0	0	0	0	0	0	0	0	0	0	0	0.97314	0	0	0	0	0.913531	0
4930413G21Rik	0	0	0	0.945103	1.0564	6.29814	2.64188	2.96004	7.81558	4.88248	2.43527	13.0075	4.65173	9.03521	0.98661	0.926735	0	0	9.75819	1.61625	8.4822	2.67522	0.927403	4.44409
4930413M19Rik	0	0	0	0	0	0	0	0	0	0	0	0	0	0	0	0	0	0	0	0	0	0	0	0
4930414N06Rik	0	0	0	0	0	0	0	0	0	0	0	0	0	0	0	0	0	0	0	0	0	0	0	0
4930415L06Rik	0	0	0	0	0	0	0	0	0	0	0	0	0	0	0	0	0	0	0	0	0	0	0	0
4930415O20Rik	0	0	0	1.90762	0	1.25494	0	0.746953	1.31862	0.63201	3.71077	0	0	0	1.00363	0	2.16916	3.88798	0	0	1.89903	0	0	0
4930417O13Rik	0	0	0	0	0	0	0	0	0	0	0	0	0	0	0	0	0	0	0	0	0	0	0	0
4930417O22Rik	0	0	0	0	0	0	0	0	0	0	0	0	0	0	0	0	0	0	0	0	0	0	0	0
4930419G24Rik	0	0	0	0	0	0	0	0	0	0	0	0	0	0	0	0	0	0	0	0	0	0	0	0
4930422M22Rik	0	0	0	0	0	0	0	0	0	0	0	0	0	0	0	0	0	0	0	0	0	0	0	0
4930423M02Rik	0	0	0	0	0	0	0	0	0	0	0	0	0	0	0	0	0	0	0	0	0	0	0	0
4930425K10Rik	0	0	0	0	0	0	0	0	0	0	0	0	0	0	0	0	0	0	0	0	0	0	0	0
4930425L21Rik	0	0	0	0	0	0	0	0	0	0	0	0	0	0	0	0	0	0	0	0	0	0	0	0
4930425O10Rik	0	0	0	0	0	0	0	0	0	0	0	0	0	0	0	0	0	0	0	0	0	0	0	0
4930426D05Rik	0	0	0	2.79818	0	0	0	0	0	0	0	0	0	0	0	0	0	2.91942	0	0	0	0	0	0.883552
4930426L09Rik	1.03431	0	2.9203	3.75703	1.06556	0	2.5881	12.6609	1.35151	3.78865	0	4.84627	12.7096	1.15771	0.990984	0	0	10.5983	1.90825	3.24555	6.72474	4.45812	0.913921	10.6149
4930428D20Rik	0	0	0	0	0	0	0	0	0	0	0	0	0	0	0	0	0	0	0	0	0	0	0	0
4930428E07Rik	0	0	0	0	0	0	0	0	0	0	0	0	0	0	0	0	0	0	0	0	0	0	0	0
4930428G15Rik	0	0	0	0	1.06663	6.31946	0	0	0	0	0	0	0	0	0	0	0	0	0	0	0	0	0	0
4930428O21Rik	0	0	0	0	0	0	0	0	0	0	0	0	0	0	0	0	0	0	0	0	0	0	0	0
4930429B21Rik	0	0.959829	2.89289	7.48417	3.19556	3.79527	6.94459	0.744075	2.70444	1.88906	6.16001	10.8585	6.33212	16.1671	2.9695	9.65365	4.36718	5.80087	18.1052	2.43072	7.66419	9.8436	6.37893	3.52965
4930429D17Rik	0	0	0	0	0	0	0	0	0	0	0	0	0	0	0	0	0	0	0	0	0	0	0	0
4930429F11Rik	0	0	0	0	0	0	0	0	0	0	0	0	0	0	0	0	0	0	0	0	0	0	0	0
4930429F24Rik	0	0	0	0	0	0	0	0	0	0	0	0	0	0	0	0	0	0	0	0.807594	0	0	1.82706	0
4930429H19Rik	0	0	0	0	0	0	0	0	0	0	0	0	0	0	0	0	0	0	0	0	0	0	0	0
4930430A15Rik	0	0	0	0	0	0	0	0	0	0	0	0	0	0	0	0	0	0	0	0	0	0	0	0
4930430F08Rik	72.322	86.5299	95.9781	82.2655	84.2004	77.5393	105.828	83.1557	132.567	138.682	116.697	126.408	124.524	111.402	102.02	95.5529	62.625	101.683	59.269	81.6376	101.218	94.8939	74.1875	103.198
4930430F21Rik	0	0	0	0	0	0	0	0	0	0	0	0	0	0	0	0	0	0	0	0	0	0	0	0
4930430J02Rik	0	0	0	0	0	0	0	0	0	0	0	0	0	0	0	0	0	0	0	0	0.961989	0	0	0
4930431F12Rik	0	0	0	0	0	0	0	0	0	0	0	0	0	0	0	0	0	0	0	0	0	0	0	0
4930431P03Rik	0	0	0	0	0	0	0	0	0	0.651055	0	0	0	0	0	0	0	0.977102	0	0	0	0	0	0
4930431P22Rik	1.04163	0	0	0.96256	0	1.25416	0	1.49496	2.63365	0.630827	9.7743	0	0	8.00976	1.98446	13.605	2.18316	4.85778	0	0	0	0.883723	0.918435	0
4930432J09Rik	0	2.85325	0	0	0	0	0	0	0	0	0	1.24986	0	0	0	0	0	0	0	0	0	0.905645	0	0
4930432K21Rik	1.05606	6.5921	24.5777	13.0453	5.44771	2.43114	4.39185	3.04509	1.37365	9.15746	12.4909	7.3717	4.85207	13.5465	13.0141	11.3851	22.1894	4.77934	0	4.72882	5.83286	6.21286	7.2001	2.70974
4930432L08Rik	0	0	0	0	0	0	0	0	0	0	0	0	0	0	0	0	0	0	0	0	0	0	0	0
4930432M17Rik	0	0	0	0	0	0	0	0	0	0	0	0	0	0	0	0	0	0	0	0	0	0	0	0
4930432O09Rik	0	0	0	0	0	0	0	0	0	0	0	0	0	0	0	0	0	0	0	0	0	0	0.913531	0
4930433B08Rik	0	0	0	0	0	0	0	0	0	0	0	0	0	0	0	0	0	0	0	0	0	0	0	0
4930433I11Rik	0	0	0	0	0	0	0	0	0	0	0	0	0	0	0	0	0	0	0	0	0	0	0	0
4930433N12Rik	0	0	0	0	0	0	0	0	0	0	0	0	0	11.6035	0	0	0	0	0.947474	0	0	0	0	0
4930434J06Rik	0	0	0	0	0	0	0	0	0	0	0	0	0	0	0	0	0	0	0	0	0	0	0	0
4930435E12Rik	0	0	0	0	0	0	0	0	0	0	0	0	0	0	0	0	0	0	0	0	0	0	0	0
4930435F18Rik	0	0	0	0	0	0	0	0	0	0	0	0	0	0	0	0	0	0	0	0	0	0	0	0
4930438E09Rik	0	0	0	0	0	0	0	0	0	0	0	0	0	0	0	0	0	0	0	0	0	0	0	0
4930440C22Rik	0	0	0	0	0	0	0	0	0	0	0	0	0	0	0	0	0	0	0	0	0	0	0	0
4930440I19Rik	0	0	0	0	0	0	0	0	0	0	0	0	0	0	0	0	0	0	0	0	0	0	0	0
4930441H08Rik	0	0	0	0	0	0	0	0	0	0	0	0	0	0	0	0	0	0	0	0	0	0	0	0
4930441J16Rik	0	0	0	0	0	0	0	0	0	0	0	0	0	0	0	0	0	0	0	0	0	0	0	0
4930442J19Rik	0	0	0	0	0	0	0	0	0	0	0	0	0	0	0	0	0	0	0	0	0	0	0	0
4930442L01Rik	0	0	0	0	0	0	0	0	0	0	0	0	0	0	0	0	0	0	0	0	0	0	0	0
4930443O20Rik	0	0.973843	0	0	0	0	4.32788	0.751281	1.3371	2.54659	1.22179	1.21685	1.58345	2.3053	0.988139	3.89877	8.68616	1.92419	1.90417	0	5.75941	0.895633	0	4.40474
4930444F02Rik	0	0	0	0	0	0	0	0	0	0	0	0	0	0	0	0	0	0	0	0	0	0	0	0
4930444G20Rik	0	0	0	0	0	1.2622	0	0	0	0	0	0	0	0	0	0	0	0	0	0	1.92398	0	0	0
4930444M15Rik	0	0	0	0	0	0	0	0	1.35395	0	0	0	0	0	0	0	0	0	0	0	0	0	0	0
4930444P10Rik	0	0.964641	0	0	0	0	0	0.530078	0	0	0	0	0	0	0	0	0	0	0	0	0	0	1.82706	0
4930445N18Rik	0	0	0	0	0	0	0	0	0	2.53454	0	0	0	0	0	0	0	0	0	0	0	0	0	0
4930447A16Rik	0	0	0	0	0	0	0	0	0	0	0	0	0	0	0	0	0	0	0	0	0	0	0	0
4930447C04Rik	0	4.2498	0	4.2343	1.85287	1.61016	0	2.05124	0	2.6786	0	0	0	0	0	4.88294	5.11377	0	1.28476	2.72913	0	2.19632	0	2.95426
4930447F24Rik	0	0	0	0	0	0	0	0	4.91115	0.704014	0	0	0	0	0	1.93003	0	0	4.01587	0.855437	0.95324	0	3.68486	4.42989
4930447J18Rik	0	0	0	0	0	0	0	0	0	0	0	0	0	0	0	0	0	0	0	0	0	0	0	0
4930447K03Rik	0	2.87292	0	8.4972	0	0	3.47447	0	4.04628	0.637051	10.0089	4.89781	0	0	0	0	2.15285	0	0	1.63146	0	0.891024	1.83919	6.2449
4930447M23Rik	0	0	1.96546	0.911824	0	1.26896	0	2.25572	0	2.56091	2.55036	0	0	2.30747	7.12186	0.999259	0	0	4.76484	0	0.968085	7.92146	5.47735	4.4144
4930447N08Rik	0	0	0	0	0	0	0	0	0	0	0	0	0	0	0	0	0	0	0	0	0	0	0	0
4930448C13Rik	0	0	0	0	0	0	0	0	0	0	0	0	0	0	0	0	0	0	0	0	0	0	0	0
4930448F12Rik	0	0	0	0	0	0	0	0	0	0	0	0	0	0	0	0	0	0	0	0	0	0	0	0
4930448H16Rik	0	0	0	0	0	0	0	0	0	0	0	0	0	0	0	0	0	0	0	0	0	0	0	0
4930448I06Rik	0	0	0	0	0	0	0	0	0	0	0	0	0	0	0	0	0	0	0	0	0	0	0	0
4930448I18Rik	0	0	0	0	0	0	0	0	0	0	0	0	0	0	0	0	0	0	0	0	0	0	0	0
4930448K20Rik	0	0	0	0	0	0	0	0	0	0	0	1.20826	0	0	0	0	0	0	0	0	0	0	0	0
4930449E01Rik	0	0	0	0	0	0	0	0	0	0	0	0	0	3.48106	0	0	0	0	0	0	0	0	0	0
4930449E18Rik	0	0	0	0	0	0	0	0	0	0	0	0	0	0	0	0	0	0	0	0	0	0	0	0
4930449I24Rik	0	0	0	0	0	0	0	0	0	0	0	0	0	0	0	0	0	0	0	0	0	0	0	0
4930451G09Rik	25.7476	32.7013	27.9309	36.0236	27.8573	20.0595	37.0243	23.1939	56.7146	36.4616	39.2433	42.3224	26.8684	38.157	26.4164	23.0168	13.0059	27.3427	18.8977	30.7495	38.1812	49.0065	34.9684	29.0986
4930451I11Rik	0	0	0	0	0	0	0	0	0	0	0	0	0	0	0	0	0	0	0	0	0	0	0	0
4930452A19Rik	0	0	0	0	0	0	0	0	0	0	0	0	0	0	0	0	0	0	0	0	0	0	0	0
4930452B06Rik	106.277	103.725	76.2809	131.992	109.836	96.3891	117.259	81.8218	102.272	91.3619	90.0787	108.472	91.8169	117.057	99.8592	117.531	71.206	81.5548	80.7972	49.4086	74.9446	59.155	53.0958	74.9055
4930452G13Rik	0	0.964891	0	0	0	0	0	0.755835	0	1.91037	0	0	3.19465	0	0	0	0	0	0	0	0	0	0	0
4930452N14Rik	0	0	0	0	0	0	0	0	0	0	0	0	0	0	0	0	0	0	0	0	0	0	0	0
4930453H23Rik	0	0	0	0	0	0	0	0	0	0	0	0	0	0	0	0	0	0	0	0	0	0	0	0
4930453L07Rik	0	0	0	0	0	0	0	0	0	0	0	0	0	0	0	0	0	0	0	0	0	0	0	0
4930453N24Rik	655.655	542.041	578.387	513.003	535.877	549.998	496.055	491.127	682.622	640.909	545.629	716.562	468.748	532.944	519.189	522.211	602.654	540.065	524.986	471.903	529.552	552.033	672.17	597.101
4930455B14Rik	0	0	0	0	0	0	0	0	0	0	0	0	0	0	0	2.89504	0	0	0	0	0	0	0	0
4930455C13Rik	0	0.955842	0	1.89761	0	0	0	0	0	0	8.66462	0	1.58966	1.16029	0	0	0	0	0	0	0	0.898629	0	0
4930455D15Rik	0	0	0	0	0	0	0	0	0	0	0	0	0	0	0	0	0	0	0	0	0	0	0	0
4930455F16Rik	0	0	0	0	0	0	0	0	0	0	0	0	0	0	0	0	0	0	1.89495	0	0	0	0	0
4930455G09Rik	0	0	0	0.960818	4.23526	3.76605	3.44596	0	2.61447	0	6.09507	1.20808	0	3.41291	0	2.89757	4.29929	13.5722	10.6188	3.2793	0	0	3.68126	5.31867
4930455H04Rik	0	16.9619	0.9963	0.909415	1.06045	2.56693	0.861004	0.758145	10.9016	0	1.27545	3.66586	0	0	0	7.07165	0	0.963886	0	2.44756	2.91188	8.72082	0	0
4930455J16Rik	0	0	0	0	0	0	0	0	0	0	0	0	0	0	0	0	0	0	0	0	0	0	0	0
4930456L15Rik	0	0	0	0	0	0	0	0	0	0	0	0	0	0	0	0	0	0	0	0	0	0	0	0
4930459C07Rik	0	0	0	0	0	0	0	0	0	0	0	0	0	0	0	0	0	0	0	0	0	0	0	0
4930459L07Rik	0	0	0	0	0	0	0	0	0	0	0	0	0	0	0	0	0	0	0	0	0	0	0	0
4930461G14Rik	0	0	0	0	1.06806	0	0	0	0	0	0	0	0	0	0	0	0	0	0	0	0	0	0	0
4930463O16Rik	0	0	0	0	0	0	0	0	0	0	0	0	0	0	0	0	0	0	0	0	0	9.05645	0	0
4930465K10Rik	0	0	0	0	0	0	0	0	0	0.62595	0	0	1.58167	0	0	0	0	0	0	0	0	0	0	1.77854
4930465M20Rik	0	0	0	0	0	0	0	0	0	0	0	0	0	0	0	0	0	0	0	0	0	0	0	0
4930467D21Rik	0	0	0	0	0	0	0	0	0	0	0	0	0	0	0	0	0	0	0	0	0	0	0	0
4930467E23Rik	0	0	0	0	0	0	0	0	0	0	0	0	0	34.9302	0	0	0	22.3822	0	0	0	0	0	1.83684
4930467J12Rik	0	0	0	0	0	0	0	0	0	0	0	0	0	0	0	0	0	0	0	0	0	0	0	0
4930467K11Rik	0	0	0	0	0	0	0	0	0	0	0	0	0	2.32644	0	0	0	0	0	0	0	0	0	0
4930469K13Rik	0	0	0	0	0	0	0	0	0	0	0	0	0	0	0	0	0	0	0	0	0	0	0	0
4930470G03Rik	3.08658	0.948913	2.96276	5.46735	0	0	8.60521	3.77943	0	1.28947	1.27991	0	0	0	2.04048	2.01174	0	2.87575	3.82378	3.23775	3.83466	0	0	3.48439
4930470H14Rik	0	0	0	0	0	0	0	0	0	0	0	0	0	0	0	0	0	0	0	0	0	0	0	0
4930470O06Rik	0	0	0	0	0	0	0	0	0	0	0	0	0	0	0	0	0	0	0	0	0	0	0	0
4930470P17Rik	0	0	0	0	0	0	0	0	0	0	0	0	0	0	0	0	0	0	0	0	0	0	0	0
4930471C04Rik	0	0	0	5.7264	1.05899	0	1.71513	0.747408	6.64771	1.26489	3.67969	6.09377	1.57935	0	0.991057	0	0	0	0	0	4.79259	0	0	0
4930471G03Rik	0	0	0	0	0	0	0	0	0	0	0	0	0	0	0	0.965013	0	0	0	0	0	0	0	0
4930471G24Rik	0	0	0	0	0	0	0	0	0	0	0	0	0	0	0	0	0	0	0	0	0	0	0	0
4930471M09Rik	0	0	0	0	0	0	0	0.746314	0	0.628919	0	9.73854	0	0	0	0	0	0	0	0	1.92398	0	0	0
4930473A02Rik	0	0	0	0	0	0	0	0	0	0	0	0	0	0	0	0	0	0	0	0	0	0	0	0
4930473O22Rik	0	0	0	0	0	0	0	0	0	0	0	0	0	0	0	0	0	0	0	0	0	0	0	0
4930474G06Rik	0	0	0	0	0	0	0	0	0	0	0	0	0	0	0	0	0	0	0	0	0	0	0	0
4930474H20Rik	0	0	0	0	0	0	0	0	0	0	0	0	0	0	0	0	0	0	0	0	0	0	0	0
4930474M22Rik	0	0	0	0	0	0	0	0	0	0	0	0	0	0	0	0	0	0	0	0	0	0	0	0
4930474N05Rik	0	0	0	0	0	0	0	0	0	0	0	0	0	0	0	0	0	0	0	0	0	0	0	0
4930474N09Rik	0	0	0	0.932727	0	0	0	0	0	0	0	0	0	0	0	0.976747	0	0	0	1.61519	1.90542	0	0	0
4930477N07Rik	0	0	0	0	0	0	0	0	0	0	0	0	0	0	0	0	0	0	0	0	0	0	0	0
4930478L05Rik	0	0	0	0	0	0	0	0	0	0	0	0	0	0	0	0	0	0	0	0	0	0	0	0
4930478P22Rik	0	0	0	0	0	0	0	0	0	0	0	0	0	0	0	0	0	0	0	0	0	0	0	0
4930479D17Rik	8.30963	3.78791	1.95218	2.88273	1.06164	11.3564	8.63519	4.51778	2.62739	0	10.9815	2.42514	0	6.86984	2.97871	0	4.31575	3.85634	10.5885	2.46642	0	11.5518	0	2.6713
4930480E11Rik	0	0	0	0	0	0	0	0	0	0	0	0	0	0	0	0	0	0	0	0	0	0	0	0
4930480G23Rik	0	0	0	0	0	0	0	0	0	0	0	0	0	0	0	0	0	0	0	0	0	0	0	0
4930480K15Rik	0	0	0	0	0	0	0	0	0	0	0	0	0	0	0	0	0	0	0	0	0	0	0	0
4930480K23Rik	65.2528	57.8138	51.3661	56.2663	77.3718	47.0906	72.234	99.2152	100.886	80.9101	82.1062	99.2307	100.262	85.8619	72.5913	77.4253	33.8798	69.041	65.629	49.2311	64.6291	96.5303	94.56	54.6098
4930480M12Rik	0	0	0	0	0	0	0	0	0	0	0	0	0	0	0	0	0	0	0	0	0	0	0	0
4930481A15Rik	422.429	640.978	408.391	341.546	526.331	402.222	504.275	521.789	661.69	520.247	561.888	564.272	445.248	433.89	470.078	427.765	267.746	305.07	359.599	377.395	478.113	389.586	330.897	359.36
4930482G09Rik	0	0	0	0	0	0	0	0	0	0	0	0	0	0	0	0	0	0	0	0	0	0	0	0
4930483J18Rik	0	0	0	0	0	0	4.29918	1.49823	0	0	0	1.21059	0	0	0	0	0	0.966251	0	0	0	0	0	0
4930483K19Rik	0	0	0	0	0	0	0	0	0	0	0	0	0	0	0	0	0	0	0	0	0	0	0	0
4930483O08Rik	0	0	0	0	0	0	0	0	0	0	0	0	0	0	0	0	0	0	0	0	0	0	0	0
4930484H19Rik	0	0.964641	0	0	0	0	0	0	0	0	0	0	0	0	0	0	0	0	0	0	0	0	0	0
4930486F22Rik	0	0	0	0	0	0	0	0	0	0	0	0	0	0	0	0	0	0	0	0	0	0	0	0
4930486I03Rik	0	0	0	0	0	0	0	0	0	0	0	0	0	0	0	0	0	0	0	0	0	0	0	0
4930486L24Rik	44.5641	26.8173	16.721	22.5575	24.5054	31.716	21.5613	30.6868	35.3084	19.8275	24.8888	40.4209	23.8013	32.4179	7.00933	36.6668	25.9113	32.5718	36.089	39.9302	18.2657	21.3458	33.577	19.3456
4930487D11Rik	0	0	0	0	0	0	0	0	0	0	0	0	0	0	0	0	0	0	0	0	0	0	0	0
4930487H11Rik	0	0	0	0	0	0	0	0	0	0	0	0	0	0	0	0	0	0	0	0	0	0	0	0
4930488B22Rik	0	0	0	0	0	0	0	0	0	0	0	0	0	0	0	0	0	0	0	0	0	0	0	0
4930488L21Rik	0	0	0	0	0	0	0	0	0	0	0	0	0	0	0	0	0	0	0	0	0	0	0	0
4930500F04Rik	0	0	0	0	0	0	0	0	0	0	0	0	0	0	0	0	0	0	0	0	0	0	0	0
4930500G05Rik	0	0	0	0	0	0	0.863061	0	2.69708	0.640973	0	0	0	2.32071	0	0	0	0	0	0	2.89628	0	0	0
4930500L23Rik	0	0	0	0	0	0	0	0	0	0	0	0	0	0	0	0	0	0	0	0	0	0	0	0
4930502A04Rik	0	0	0	0	0	0	0	0	0	0	0	0	0	0	0	0	0	0	0	0	0	0	0	0
4930502E09Rik	0	0.964641	0	0	2.15838	0	0	0	0	0	0	0	0	0	0	0	0	0	0	0	0	0.905645	0	0
4930502E18Rik	0	0	1.92704	0	0	0	4.21969	0.75167	1.36159	1.28379	0	2.46929	0	0	1.02599	5.01362	2.14422	3.90343	0	2.48386	0	7.76522	0.911072	0
4930503B20Rik	0	0	2.94525	0	0	3.77955	8.59696	0.741754	1.34273	3.19526	0	0	1.58466	8.02241	0	0.988295	0	0	0.94984	0	0.959978	1.76866	0	0.880784
4930503E14Rik	0	0	0	0	0	0	0	0	1.3675	0.632089	0	0	0	0	0	0	0	0	0	0	0	0	0	0
4930503E24Rik	0	0	0	0	0	0	0	0	0	0	0	0	0	2.32071	0	0	0	0	0	0	0.965248	0	0	0
4930503F20Rik	0	0	0	0	0	0	0	0	0	0	0	0	0	0	0	0	0	0	0	0	0	0	0	0
4930503H13Rik	0	0	0	0	0	0	0	0	0	0	0	0	0	0	0	0	0	0	0	0	0	0	0	0
4930503L19Rik	117.751	99.8439	107.238	98.3057	109.102	91.65	124.238	112.756	166.763	138.586	123.729	126.542	124.226	52.2401	62.0186	78.0746	96.9488	119.124	103.468	85.4495	102.074	122.226	120.948	132.987
4930503O07Rik	0	0	0	0	0	0	0	0	0	0	0	0	0	0	0	0	0	0	0	0	0	0	0	0
4930504C09Rik	0	0	0	0	0	0	0	0	0	0	0	0	0	0	0	0	0	0	0	0	0	0	0	0
4930504O13Rik	0	0	0	0	0	0	0	0	0	0	0	0	0	0	0	0	0	0	0	0	0	0	0	0
4930505A04Rik	1.04064	1.89221	0	0	3.20481	1.28445	0	0.753093	2.71004	2.54934	0	3.69785	1.59681	4.63605	3.03728	0	0	0	0	1.6247	2.88407	0	4.53742	0.882258
4930505G20Rik	0	0	0	0	0	0	0	0	0	0	0	0	0	0	0	0	0	0	0	0	0	0	0	0
4930505K13Rik	0	0	0	0	0	0	0	0	0	0	0	0	0	0	0	0	0	0	0	0	0	0	0	0
4930505K14Rik	0	0	0	0	0	0	0	0	0	0	0	0	0	0	0	0	0	0	0	0	0	0	0	0
4930505N22Rik	0	0.96737	0.960803	0	0	0	0	1.49656	0	0.615108	0	2.36909	1.57109	0	0.98025	0.931887	0	0	0	0.809872	0	0	0	0
4930506A18Rik	0	0	0	0	0	0	0	0	0	0	0	0	0	0	0	0	0	0	0	0	0	0	0	0
4930506C21Rik	0	1.90667	0.97324	1.90742	1.0653	1.25942	0.862898	1.49985	6.67666	0	1.22766	2.4296	0	3.45968	0	0	2.16567	0	0.956055	0	0	1.79642	0	0.889658
4930507D05Rik	5.16777	1.92562	2.8742	1.904	3.20949	5.01453	8.67437	2.22885	5.34173	3.76246	1.20807	1.20038	11.05	6.90337	8.76671	6.6454	15.317	3.88378	0.950138	0.810885	12.4045	9.95127	2.74882	6.17949
4930507D10Rik	0	0	0	0	0	0	0	0	0	0	0	0	0	0	0	0	0	0	0	0	0	0	0	0
4930509E16Rik	0	0	0	0	5.32761	0	1.73024	0	0	0	0	0	0	0	0	0	2.18504	0.969828	0	0	0	0	1.81863	3.5506
4930509G22Rik	1.0362	5.72169	0	2.72902	6.34555	2.60038	0.862376	1.54524	5.50392	10.8984	2.63415	0	3.14834	6.97756	4.18767	3.05814	4.22518	0	12.6257	6.53416	4.89697	11.3924	3.68943	7.12429
4930509J09Rik	0	0	0	0	0	0	0	0	0	0	0	0	0	0	0	0	0	0	0	0	0	0	0	0
4930509K18Rik	0	0	0	0	0	0	0	0	0	0	0	0	0	0	0	0	0	0	0	0	0	0	0	0
4930511A02Rik	0	0	0	0	0	0	0	0	0	0	0	0	0	0	0	0	0	0	0	0	0	0	0	0
4930511A08Rik	2.08511	3.70046	0	0	0	0	0	0	0	0	2.41299	0	0	1.12617	0	0	0	0	0	0	3.8391	1.73819	3.77013	5.45801
4930511E03Rik	0	0	0.963521	0	0	0	0	0	0	0	0	0	0	0	0	0	0	0	0	0	0	0	0	0
4930511M06Rik	5.17566	0	4.0051	1.81687	1.04848	1.28713	0	2.28553	2.726	1.9107	6.45154	6.12465	0	2.17338	1.03898	3.05288	0	0	1.92348	0.813577	0	0	3.68629	0.8914
4930512B01Rik	0	0	0	0	0	0	0	0	0	0	0	0	0	0	0	0	0	0	0	0	0	0	0	0
4930512J16Rik	0	4.78778	4.87823	0	0	0	0	0	0	0.635176	0	0	1.59617	3.47023	1.97029	0	0	0	0	2.41765	1.92176	0.897401	3.64908	0.88215
4930512M02Rik	0	0	0	0	0	0	0	0	0	0	0	0	0	0	0	0	0	0	0	0	0	0	0	0
4930513D17Rik	0	0	0	0	0	0	0.863061	0	0	0	0	0	0	0	0	0	0	0	0	0	0	0	0	0
4930513N10Rik	8.26185	0.962822	5.79646	0.938988	2.13571	1.26242	6.96085	5.20188	0	5.64415	21.9765	0	11.0606	4.60446	8.87121	1.91653	4.36597	2.9078	4.76274	3.235	4.77337	0.897982	11.8711	4.40987
4930513O06Rik	0	0	0	0	0	0	0	0	0	0	0	0	0	0	0	0	0	0	0	0	0	0	0	0
4930515B02Rik	0	0	0	0	0	0	0	0	0	0	0	0	0	0	0	0	0	0	0	0	0	0	0	0
4930515G01Rik	5.15712	6.69993	2.86617	1.90288	2.13363	0	6.08724	2.96657	3.99004	5.64081	6.03387	2.40169	1.57814	1.14898	0.976658	5.69046	0	0.97049	3.82233	2.44008	0.952654	5.40528	4.58416	1.76971
4930515G16Rik	0	0	0	0	0	0	0	0	0	0	0	0	0	0	0	0	0	0	0	0	0	0	0	0
4930515L03Rik	0	0	0	0	0	0	0	0	0	0	0	0	0	0	0	0	0	0	0	0	0	0	0	0
4930515L19Rik	0	0	0	0	0	0	0	0	0	0	0	0	0	0	0	0	0	0	0	0	0	0	0	0
4930517E11Rik	0	0	0	0	0	0	0	0	0	0	0	0	0	0	0	0	0	0	0	0	0	0	0	0
4930517M08Rik	0	0	0	0	0	0	1.72612	0	0	0	0	0	0	0	0	0	0	0	0	0	0.961989	0	0	0
4930518J21Rik	0	0	0	0	0	0	0	0	0	0	0	0	0	0	0	0	0	0	0	0	0	0	0	0
4930518P08Rik	0	0	0	0	0	0	0	0	0	0	0	0	0	0	0	0	0	0	0	0	0	0	0	0
4930519D14Rik	0	0	0	0	0	0	0	0	0	0	0	0	0	0	0	0	0	0	0	0	0	0	0	0
4930519F16Rik	0	0	0	0	0	0	0	0	0	0	0	0	0	0	0	0	0	0	0	0	0	0	0	0
4930519F24Rik	0	0	0	0	0	0	0	0	0	0	0	0	0	0	0	0	0	0	0	0	0	0	0	0
4930519G04Rik	0	0	0	0	0	0	0	0	0	0	0	0	0	0	0	0	0	0	0	0	0	0	0	0
4930519H02Rik	0	0	0	0	0	0	0	0	0	0	0	0	0	0	0	0	0	0	0	0	0	0	0	0
4930519K11Rik	0	0	0	0	0	0	0	0	0	0	0	0	0	0	0	0	0	0	0	0	0	0	0	0
4930519L02Rik	0	0	0	0	0	0	0	0	0	0	0	0	0	0	0	0	0	0	0	0	0	0	0	0
4930520O04Rik	1.0782	4.96439	11.1429	8.91475	29.0744	8.27871	7.2856	5.62184	8.42785	10.4173	19.2457	22.9617	22.0597	8.9888	46.5773	7.294	6.73756	14.9609	6.90274	2.97372	6.01705	11.1912	9.5453	6.50472
4930520P13Rik	0	0	0	0	0	0	0	0	0	0	0	0	0	0	0	0	0	0	0	0	0	0	0	0
4930521E06Rik	0	0	0	0	0	0	0	0	0	0	0	0	0	0	0	0	0	0	0	0	0	0	0	0
4930521O11Rik	0	0	7.78885	0	0	0	0	0	0	0	0	0	0	0	0	0	0	0	0	0	0	0.905645	0	0
4930521O17Rik	0	0	0	0	0	0	0	0	0	0	0	0	0	0	0	0	0	0	0	0	0	0	0	0
4930522H14Rik	0	0	0	0	0	0	0	0	0	0	0	0	0	0	0	0	0	0	0	0	0	0	0	0
4930522O17Rik	1.0316	3.6641	7.1063	1.88783	0	0	0.873926	0	1.31191	0.636448	0	0	3.15114	0	4.09043	0	0	0	0	0	0	0	1.80838	2.65091
4930522P08Rik	0	1.83469	0	1.98799	1.05502	1.2824	0.875382	0	3.75059	3.06732	0	2.43208	1.52478	0	4.05497	2.88378	0	0	0	0	0.9414	0	0	0
4930523C07Rik	483.147	568.282	672.096	688.365	681.537	705.666	605.558	601.554	619.409	702.918	764.669	633.986	704.81	710.204	649.675	730.531	576.049	577.89	601.867	602.924	659.36	750.373	698.606	757.039
4930523O13Rik	0	0	0	0	0	0	0	0	0	0	0	0	0	0	0	0	0	0	0	0	0	0	0	0
4930524B15Rik	0	0	0	0	0	0	0	0	5.50234	0	0	0	0	0	0	0	0	0	0	0	0	0	0	0
4930524B17Rik	0	0	0	0	0	0	0	0	0	0	0	0	0	0	0	0	0	0	0	0	0	0	0	0
4930524C18Rik	0	0	0	0	0	0	0	0	0	0	0	0	0	0	0	0	0	0	0	0	0	0	0	0
4930524N10Rik	0	0	0	0	0	0	0	0	0	0	0	0	0	0	0	0	0	0	0	0	0	0	0	0
4930524O05Rik	0	0	0	0	0	0	0	0	0	0	0	0	0	0	0	0	0	0	0	0	0	0	0	0
4930524O08Rik	0	0	0	0	0	0	0	0	0	0	0	0	0	0	0	0	0	0	0	0	0	0	0	0
4930525C09Rik	0	0	0	0	0	0	0	0	0	0	0	0	0	0	0	0	0	0	0	0	0	0	0	0
4930525D18Rik	0	1.92928	0	0	0	0	0.872093	0	0	0	0	2.43109	0	0	0	0	0	0	0	0.807345	0	0	0	0
4930525G20Rik	1.03638	6.65055	6.05577	3.64528	4.23898	1.29419	2.56705	9.08526	4.16327	3.8649	7.82152	4.9721	9.59397	9.34055	5.18578	7.16967	2.14621	3.82224	9.62564	2.43353	6.81795	6.93664	5.44601	6.18072
4930526H09Rik	0	0	0	0	0	0	0	0	0	0	0	0	0	0	0	0	0	0	0	0	0	0	0	0
4930526I15Rik	72.3451	69.5293	61.9698	59.9056	53.873	80.8076	63.6066	85.7301	65.4353	59.4508	55.8194	48.3976	60.8382	50.5285	62.1135	55.1469	43.5038	69.1561	55.2251	61.4259	58.3397	69.3085	58.324	48.22
4930526L06Rik	0	0	0	0	0	0	0	0	0	0	0	0	0	0	0	0.965013	0	0	0	0	0	0	0	0
4930527F14Rik	0	0	0	0	0	0	0	0	0	0	0	0	0	0	0	0	0	0	0	0	0	0	0	0
4930527G23Rik	0	0	0	0	0	0	0	0	0	0	0	0	0	0	0	0	0	0	0	0	0	0	0	0
4930528A17Rik	4.11056	12.2708	9.02685	6.26556	1.04746	7.81613	9.45331	3.85838	16.5122	18.4498	13.3285	11.0975	9.42697	20.9605	6.35195	1.02264	10.5587	16.5791	9.80188	17.9693	8.83254	7.83544	12.0162	15.2003
4930528D03Rik	0	0	0	0	0	0	0	0	0	0	0	0	0	0	0	0	0	0	0	0	0	0	0	0
4930528G23Rik	0	0	0	0	0	0	0	0	0	0	0	0	0	0	0	0	0	0	0	0	0	0	0	0
4930528H21Rik	0	0	0	0	0	0	0	0	0	0	0	0	0	0	0	0	0	0	0	0	0	0	0	0
4930528P14Rik	0	0	0	0	0	0	0	0	0	0	0	0	0	0	0	0	0	0	0	0	0	0	0	0
4930529C04Rik	0	0	0	0	0	0	0	0	0	0	0	0	0	0	0	0	0	0	0	0	0	0	0	0
4930529K09Rik	0	0	0	0	0	0	0	0	0	0	0	0	0	0	0	0	0	0	0	0	0	0	0	0
4930529L06Rik	0	0	0	0	0	0	0	0	0	0	0	0	0	0	0	0	0	0	0	0	0	0	0	0
4930529N20Rik	0	0	0	0	0	0	0	0	0	0	0	0	0	0	0	0	0	0	0	0	0	0	0	0
4930532I03Rik	0	0	0	0	0	0	0	0	0	0	0	0	0	0	0	0	0	0	0	0	0	0	0	0
4930532M18Rik	0	0	0	0	0	0	0	0	0	0	0	0	0	0	0	0	0	0	0	0	0	0	0	0
4930533B01Rik	0	0	0	0	0	0	0	0	0	0	0	0	0	0	0	0	0	0	0	0	0	0	0	0
4930533N22Rik	0	0	0	0	0	0	0	0	0	0	0	0	0	0	0	0	0	0	0	0	0	0	0	0
4930533P14Rik	0	0	0	0	0	0	0	0	0	0	0	0	0	0	0	0	0	0	0	0	0	0	0	0
4930534H03Rik	0	0	0	0	0	0	0	0	0	0	0	0	0	0	0	0	0	0	0	0	0	0	0	0
4930539C22Rik	0	0	0	0	0	0	0	0	0	0	0	0	0	0	0	0	0	0	0	0	0	0	0	0
4930539E08Rik	3.09514	3.85905	2.87926	1.87915	4.27499	7.56306	0	2.98285	8.13698	10.0682	7.35299	1.20125	0	9.2633	2.94274	6.70485	2.19087	0.973707	6.64957	2.42705	5.7518	0	2.74203	10.6105
4930539J05Rik	19.6597	9.40169	7.82316	5.74168	5.28851	2.52953	5.2622	11.9953	9.1071	12.3504	7.27463	7.18371	1.56095	6.81727	5.96551	10.5283	2.1769	5.80536	22.458	2.4616	3.80743	2.6294	0.924249	8.07007
4930539M17Rik	0	0	0	0	0	0	0	0	0	0	0	0	0	0	0	0	0	0	0	0	0	0	0	0
4930539N22Rik	0	0	0	0	0	0	0	0	0	0	0	0	0	0	0	0	0	0	0	0	0	0	0	0
4930540M03Rik	0	0	0	0	0	0	0	0	0	0	0	0	0	0	0	0	0	0	0	0	0	0	0	0
4930542C21Rik	0	0	0	0	0	0	0	0.746314	0	0.633634	0	0	0	0	0	0	2.16673	0	0	0	0	0	0	0
4930542D17Rik	0	0	0	0	0	0	0	0	0	0	0	0	0	0	0	0	0	0	0	0	0	0	0	0
4930542M03Rik	0	0	0	0	0	0	0	0	0	0	0	0	0	0	0	0	0	0	0	0	0	0	0	0
4930543E12Rik	0	0	0	0	0	0	0	0	1.36294	0	0	0	0	0	0	0	0	0	0	0	0	0	0	0
4930543N07Rik	0	0	0	0	0	0	0	0	0	0	0	0	0	0	0	0	0	0	0	0	0	0	0	0
4930544D05Rik	0	0	0	0	0	0	0	0	0	0	0	0	0	0	0	0	0	0	0	0	0	0	0	0
4930544G11Rik	1.0317	0	0	0	0	0	0	0	0	0	0	0	0	0	0	0	0	0	0	0	0	0	0	0
4930544M13Rik	0	0	0	0	0	0	0	0	0	0	0	0	0	0	0	0	0	0	0	0	0	0	0	0
4930545E07Rik	0	0	0	0	0	0	0	0	0	0	0	0	0	0	0	0	0	0	0	0	0	0	0	0
4930545H06Rik	0	0	0	0	0	0	0	0	0	0	0	0	0	0	0	0	0	0	0	0	0	0	0	0
4930545L23Rik	2.06341	0	0	0	0	3.8293	0	0	0	1.28548	0	0	0	0	0	0	0	0	0	0	4.80994	0	0	0
4930546C10Rik	0	0	0	0	0	0	0	0	0	2.53454	0	0	0	0	0	0	0	0	0	0	0	0	0	0
4930546K05Rik	0	3.86254	0	0	0	0	0	0	2.71671	1.27482	1.23369	3.65507	6.39257	3.48611	0	0	17.4074	0.961447	0	4.86446	0.966748	2.68983	0.911792	0
4930547E08Rik	0	0	0	0	0	0	0	0	0	0	0	0	0	0	0	0	0	0	0	0	0	0	0	0
4930547E14Rik	0	0	0	0	0	0	0	0	0	0	0	0	0	0	0	0	0	0	0	0	0	0	0	0
4930548G14Rik	0	0	0	0	0	0	0	0	0	0	0	0	0	0	0	0	0	0	0	0	0	0	0	0
4930548H24Rik	0	0	0	0	0	0	0	2.23894	0	1.26342	0	0	0	0	0	0	0	2.88738	0.950756	0	0	0.905645	0	0
4930548J01Rik	0	0	0	0	0	0	0	0	0	0	0	0	0	0	0	0	0	0	0	0	0	0	0	0
4930548K13Rik	0	0	0	0	0	0	0	0	0	0	0	0	0	0	0	0	0	0	0	0	0	0	0	0
4930549C15Rik	0	0	0	0	0	0	0	0	0	0	0	0	0	0	0	0	0	0	0	0	0	0	0	0
4930549G23Rik	0	0	0	0	0	0	0	0	0	0	0	0	0	0	0	0	0	0	0	0	0	0	0	0
4930550C14Rik	2.0622	3.77883	4.0109	7.36533	1.0681	1.2816	12.0906	2.23763	0	4.54768	15.1515	0	3.21334	8.11645	4.06069	1.01508	0	0	0	12.115	8.66522	0.869886	3.59298	4.391
4930550C17Rik	0	0	0	0	0	0	0	0	0	0	0	0	0	0	0	0	0	0	0	0	0	0	0	0
4930550L24Rik	0	0	0	0	0	0	0	0	0	0	0	0	0	0	0	0	0	0	0	0	0	0	0	0
4930552N02Rik	0	0	0	0	0	0	0	0	0	0	0	0	0	0	0	0	0	0	0	0	0	0	0	0
4930552P12Rik	25.8274	14.4246	27.0049	28.4533	34.2264	13.8248	24.0901	29.9224	35.0818	41.0648	25.7687	15.7663	34.8266	47.4509	28.48	16.4147	6.50114	8.7388	2.83736	21.9112	17.2533	19.8833	22.8986	20.2644
4930553C11Rik	0	0	0	0	0	0	0	0	0	0	0	0	0	0	0	0	0	0	0	0	0	0	0	0
4930553E22Rik	0	0	0	0	0	0	0	0	0	0	0	0	0	0	0	0	0	0	0	0	0	0	0	0
4930553J12Rik	0	0	0	0	0	0	0	0	0	0	0	0	0	0	0	0	0	0	0	0	0	0	0	0
4930553P18Rik	4.15635	3.83274	0	0.934498	12.8187	0	4.31286	8.31975	5.45177	12.7361	3.78642	13.4773	6.35505	3.4817	8.0627	9.92653	2.15985	10.5917	10.5194	8.12223	4.8432	7.07359	2.73339	7.95187
4930554C24Rik	0	0	0	0	0	0	0	0	0	0	0	0	0	0	0	0	0	0	0	0	0	0	0	0
4930554G24Rik	0	0	0	0	0	0	0	0	0	0	0	0	4.77505	0	0	0	0	1.94628	0	0	0	0	0	0
4930554H23Rik	0	0	0	0	0	0	0	0	0	0	0	0	0	0	0	0	0	0	0	0	0	0	0	0
4930554I06Rik	0	0	0	0	0	0	0	0	0	0	0	0	0	0	0	0	0	0	0	0	0	0	0	0
4930555B11Rik	0	0	0	0	0	0	0	0	0	0	0	0	0	0	0	0	0	0	0	0	0	0	0	0
4930555B12Rik	0	0	0	0	0	0	0	0	0	0	0	0	0	0	0	0	0	0	0	0	0	0	0	0
4930555G01Rik	2.01517	0	4.06003	0	3.06035	5.20264	3.36294	4.6045	0	1.28511	5.53628	1.24998	1.5626	1.1593	4.37218	5.30328	4.16847	1.94104	0	1.64506	0.993275	1.69817	6.45193	11.6436
4930555G21Rik	0	0	0	0	0	0	0	0	0	0	0	0	0	0	0	0	0	0	0	0	0	0	0	0
4930555K05Rik	0	0	0	0	0	0	0	0	0	0	0	0	0	0	0	0	0	0	0	0	0	0	0	0
4930555K19Rik	0	0	0	0	0	0	0	0	0	0	0	0	0	0	0	0	0	0	0	0	0	0	0	0
4930556C24Rik	0	0	0	0	0	0	0	0	0	0	0	0	0	0	0	0	0	0	0	0	0	0	0	0
4930556G01Rik	1.00061	0	0.993461	0	0	0	0	0	0	0	0	1.20826	0	0	0	0	0	0	0	0	0.961989	0	0	0
4930556J02Rik	0	0	0	0	0	0	0	0	0	0	0	0	0	0	0	0	0	0	0	0	0	0	0	0
4930556L07Rik	0	0	0	0	0	0	0	0	0	0	0	0	0	0	0	0	0	0	0	0	0	0	0	0
4930556M19Rik	23.4209	7.56108	27.7368	61.0668	28.5807	22.5693	28.154	46.0612	10.1302	18.0333	36.8383	33.0161	36.2885	33.0366	31.0822	26.0657	16.3012	42.6296	30.2418	26.7253	24.815	16.8463	28.7725	27.8604
4930556N09Rik	0	0	0	0	0	0	0	0	0	0	0	0	0	0	0	0	0	0	0	0	0	0	0	0
4930556N13Rik	0	0	0	0	0	0	0	0	0	0	0	0	0	0	0	0	0	0	0	0	0	0	0	0
4930557F10Rik	0	0	0	0	0	0	0	0	0	0	0	0	0	0	0	0	0	0	0	0	0	0	0	0
4930557J02Rik	0	0	0	0	0	0	0	0	0	0	0	0	0	0	0	0	0	0	0	0	0	0	0	0
4930557K07Rik	0	0	0	0	0	0	0	0	0	0	0	0	0	0	0	0	0	0	0	0	0	0	0	0
4930558C23Rik	0	0	0	0	0	0	0	0	0	0	0	0	0	0	0	0	0	0	0	0	0	0	0	0
4930558F17Rik	0	0	0	0	0	0	0	0	0	0	0	0	0	0	0	0	0	0	0	0	0	0	0	0
4930558G05Rik	0	0	0	0	0	0	0	0	0	0	0	0	0	0	0	0	0	0	0	0	0	0	0	0
4930558J18Rik	0	2.89392	0	0	0	0	0	0.761745	0	0	0	0	0	0	0	0	0	0	0	0	0	0	0.913531	0
4930558K02Rik	0	0	0	0	0	0	0	0	0	0	0	0	0	0	0	0	0	0	0	0	0	0	0	0
4930559C10Rik	0	0	0	0	0	0	0	0	0	0	0	0	0	0	0	0	0	0	0	0	0	0	0	0
4930562C15Rik	0	0	0	0	0	0	0	0	0	0	0	0	0	0	0	0.965013	0	0.971168	0	0.809235	2.87938	0	0	0
4930562F07Rik	0	0.964641	0	0	0	0	0	0	0	0	0	0	1.59168	0	0	0	0	0	0	0	0	0	0	0
4930563E18Rik	0	3.79393	3.94356	0	0	0	0	2.98571	2.74701	3.21795	8.79594	0	0	0	5.04585	5.00402	2.17117	0	0	0.811494	0.962369	0.877356	0	0.876863
4930563E22Rik	6.18623	13.2766	6.99512	9.02677	11.5864	15.5558	8.59708	9.93083	9.64107	18.5081	23.562	24.6124	12.659	18.6402	12.5187	17.2481	14.9628	11.6269	8.7571	9.77213	2.93467	5.24076	4.58864	7.1228
4930563F08Rik	0	0	0	0	0	0	0	0	0	0	0	0	0	0	0	0	0	0	0	0	0	0	0	0
4930563H07Rik	0	0	0	0	0	0	0	0	0	0	0	0	0	0	0	0	0	0	0	0	0	0	0	0
4930563J15Rik	0	0	0	0	0	0	0	0	0	0	0	0	0	0	0	0	0	0	0	0	0	0	0	0
4930563M20Rik	0	0	0	0	0	0	0	0	0	0	0	0	0	0	0	0	0	0	0	0	0	0	0	0
4930563M21Rik	0	0	0	0	0	0	0	0	0	0	0	0	0	0	0	0	0	0	0	0	0	0	0	0
4930564C03Rik	0	0	0	0	0	0	0	0	0	0	0	0	0	0	0	0	0	0	0	0	0	0	0	0
4930564D02Rik	0	0	0	0	0	0	0	0	0	0	0	0	0	0	0	0	0	0	0	0	0	0	0	0
4930565D16Rik	0	0	0	0	0	0	0	0	0	0	0	0	0	0	0	0	0	0	0	0	0	0	0	0
4930565N06Rik	0	0	0	0	0	0	0	0	0	0	2.47335	0	0	0	0	0	0	0	0	0	0	0	3.65413	0
4930567H12Rik	0	0	0	0	0	0	0	0	0	0.624019	0	0	0	0	0	0	0	0	0	0	0	0	0	0
4930567H17Rik	0	0	0	0	0	0	0	0	0	0	0	0	0	0	0	0	0	0	0	0	0	0	0	0
4930567J20Rik	0	0	0	0	0	0	0	0	0	0	0	0	0	0	0	0	0	0	0	0	0	0	0	0
4930567K12Rik	0	0	0	0	0	0	0	0	0	0	0	0	0	0	0	0	0	0	0	0	0	0	0	0
4930567K20Rik	0	0	0	0	0	0	0	0	0	0	0	0	0	0	0	0	0	0	0	0	0	0	0	0
4930568D16Rik	0	0	0	0	0	0	0	0	0	0	0	0	0	0	0	0	0	0	0	0	0	0	0	0
4930568E12Rik	0	0	0	0	0	0	0	0	0	0	0	0	0	0	0	0	0	0	0	0	0	0	0	0
4930568G15Rik	0	0	0	0	0	0	0	0	0	0	0	0	0	0	0	0	0	0	0	0	0	0	0	0
4930570G19Rik	1.16006	3.39568	1.58537	0	1.20721	2.09187	0	1.93781	3.54957	6.9367	3.95002	4.61834	1.55275	6.73182	3.7798	0	4.27243	2.7065	13.9092	1.9991	10.2779	10.5663	1.76024	1.92348
4930571K23Rik	0	0	0	0	0	0	0	0	0	0	0	0	0	0	0	0	0	0	0	0	0	0	0	0
4930571O06Rik	0	0	0	0	0	0	0	0	0	0	0	0	0	0	0	0	0	0	0	0	0	0	0	0
4930572K03Rik	0	0	0	0	0	0	0	0	0	0	0	0	0	0	0	0	0	0	0	0	0	0	0	0
4930572O03Rik	0	0	0	0	0	0	0	0	0	0	0	0	0	0	0.984301	0	0	1.94628	0	0	0	4.48113	0	0
4930572O13Rik	0	0	0	0	0	0	0	0	0	0	0	0	0	0	0	0	0	0	0	0	0	0	0	0
4930573H18Rik	0	0	0	0	0	0	0	0	0	0	0	0	0	0	0	0	0	0	0	0	0	0	0	0
4930573O16Rik	0	0	0	0	0	0	0	0	0	0	0	0	0	0	0	0	0	0	0	0	0	0	0	0
4930577N17Rik	27.8438	30.4599	19.4978	17.3937	22.124	24.2723	40.5037	43.5945	59.0503	41.8703	36.2098	48.7908	37.0405	45.334	21.1756	47.2937	19.3359	28.7611	19.6027	24.2896	28.558	32.9125	19.5675	40.9711
4930578C19Rik	129.648	161.483	182.001	224.221	288.024	211.082	264.263	238.917	321.497	304.719	392.568	354.706	342.591	267.153	326.52	411.199	341.799	237.992	278.712	269.191	339.013	268.819	317.885	333.144
4930578E11Rik	0	0	0	0	0	0	0	0	0	0	0	0	0	0	0	0	0	0	0	0	0	0	0	0
4930578G10Rik	2.10231	0	0	0	0	3.77166	0	3.74848	1.30865	2.48792	0	0	1.56186	0	2.93333	0	0	4.8748	1.92099	1.63063	2.86292	6.28071	0	0
4930578I06Rik	0	0	0	0	0	0	0	0	0	0	0	0	0	0	0	0	0	0	0	0	0	0	0	0
4930578L24Rik	3.08086	16.1599	0.99016	0	5.2657	3.84709	6.85389	3.0171	0	4.48946	9.05327	4.93142	0	3.49939	1.02768	2.01843	2.14319	3.85782	9.59683	5.68004	4.84729	5.27228	7.26968	1.76346
4930578M01Rik	1.03098	0	1.93765	2.85112	2.12342	0	2.5768	1.49467	7.93833	1.89447	0	3.63778	1.57773	0	3.9549	2.91489	0	9.62106	0	0.818508	0.959268	0.889195	0	4.42629
4930578N18Rik	0	0	0	0	0	0	0	0	0	0	0	0	0	0	0	0	0	0	0	0	0	0	0	0
4930579D09Rik	0	0	0	0	0	0	0	0	0	0	0	0	0	0	0	0	0	0	0	0	0	0	0	0
4930579F01Rik	0	0	0	0	0	0	0	0	0	0	0	0	0	0	0	0	0	0	0	0	1.92398	0	0	0
4930579G18Rik	1.03755	0	1.94819	0	2.13768	0	0	0.746503	0	0	0	0	1.58476	0	4.91478	0.969254	0	3.87227	0.952439	0	0	0	1.82175	3.51987
4930579G24Rik	21.6153	20.9525	35.8015	26.3046	33.7621	19.3146	31.0886	40.3558	41.2128	49.8525	47.7128	56.4303	25.2192	38.3707	51.6258	35.2931	36.3001	29.1162	37.6778	31.0103	37.9738	35.3201	43.0967	36.3961
4930579H20Rik	0	0	0	0	0	0	0	0	0	0	0	0	0	1.16035	0	0	0	0	0	0	0	0	0	0
4930579J19Rik	0	0	0	0	0	0	0	0	0	0	0	0	0	0	0	0	0	0	0	0	0	0	0	0
4930579K19Rik	6.22153	1.89293	0	5.31683	3.17943	0	3.56365	0	1.37596	7.63735	0	2.46754	7.70801	0	4.31516	3.08186	0	2.98925	0	5.01369	0	6.05472	0	1.81543
4930579P08Rik	0	0	0	0	0	0	0	0	0	2.53454	0	0	0	0	0	0	0	0	0	0	0	0	0	0
4930581F22Rik	23.7484	24.0497	28.1321	33.033	19.2733	18.886	36.1832	29.8827	16.2809	12.6707	43.0922	43.7237	65.0572	17.3673	28.5677	30.0737	21.7014	35.857	21.747	29.167	33.5232	40.5551	26.5037	38.7336
4930583I09Rik	0	0	0	0	0	0	0	0	0	0	0	0	0	0	0	0	0	0	0	0	0	0	0	0
4930583K01Rik	0	0	0	0	0	0	0	0	0	0	0	0	0	0	0	0	0	0	0	0	0	0	0	0
4930583P06Rik	2.06341	0	0	0	0	0	0	0	0	0	0	0	0	0	0	0	0	0	0	0	0	0	0	0
4930584F24Rik	0	0	0	0	0	0	0	0	0	0	0	0	0	0	0	0	0	0	0	0	0	0	0	0
4930586N03Rik	0	0	0	0	0	0	0	0	0	0	0	0	0	0	0	0	0	0	0	0	0	0	0	0
4930587E11Rik	0	0	0	0	0	0	0	0	0	0	0	0	0	0	0	0	0	0	0	0	0	0	0	0
4930589L23Rik	0	0	0	0	0	0	0	0	0	0	0	0	0	0	0	0	0	0	0	0	0	0	0	0
4930590A17Rik	0	0	0	0	0	0	0	0	0	0	0	0	0	0	0	0	0	0	0	0	0	0	0	0
4930590J08Rik	0	6.73288	0	3.79704	0	1.25402	0	0.745403	0	1.26608	6.10555	0	0	0	0.979419	2.88925	6.54223	2.91064	0	0	4.79638	0.90592	0	5.28921
4930590L20Rik	0	0	0	0	0	0	0	0	0	0	0	0	0	0	0	0	0	0	0	0	0	0	0	0
4930591A17Rik	0	0	0	0	0	0	0	0	0	0	0	0	0	0	0	0	0	0	0	0	0	0	0	0
4930591E09Rik	0	0	0	0	0	0	0	0	0	0	0	0	0	0	0	0	0	0	0	0	0	0	0	0
4930592A05Rik	0	0	0	0	0	0	0	0	0	0	0	0	0	0	0	0	0	0	0	0	0	0.905645	0	0
4930592C13Rik	2.07542	1.88052	0	0.92179	5.34872	0	4.41943	0	0	3.17778	1.28271	3.6783	0	1.16733	0	0	0	1.9083	1.9412	3.26618	0.980171	7.85665	2.78314	0.90229
4930592I03Rik	0	0	0	0	0	0	0	0	0	0	0	0	0	0	0	0	0	0	0	0	0	0	0	0
4930593A02Rik	0	0	0	0	0	0	0	0	0	0	0	0	0	0	0	0	0	0	0	0	0	0	0	0
4930593C16Rik	0	0	0	0	0	0	0	0	0	0	0	0	0	0	0	0	0	0	0	0	0	0	0	0
4930594C11Rik	0	0.941618	1.99767	0.898779	0	0	0	1.51282	4.16895	1.94376	0	7.44615	8.08758	1.181	0	0	0	0	0	0	2.94874	2.65109	9.15461	0.890906
4930594M22Rik	5.15822	0.953879	0.994859	0	5.30941	12.6574	0.856913	4.50236	5.56757	1.28881	1.29001	0	0	0	5.05636	3.04116	0	2.86956	1.90864	3.2307	1.93848	3.50247	7.23867	1.75885
4930594O21Rik	0	0	0	0	0	0	0	0	0	0	0	0	0	0	0	0	0	0	0	0	0	0	0	0
4930595D18Rik	0	0	0	0	0	0	0	0	0	0	0	0	0	0	0	0	0	0	0	0	0	0	0	0
4930595M18Rik	0	0	0	0	0	0	0	0	0	0	0	0	0	0	0	0	0	0	0	0	0	0	0	0
4930596D02Rik	0	0	0	0	0	0	0	0	0	0	0	0	0	0	0	0	0	0	0	0	0	0	0	0
4930596I21Rik	0	0	0	0	0	0	0	0	0	0	0	0	0	0	0	0	0	0	0	0	0	0	0	0
4930597A21Rik	0	0	0	0	0	0	0	0	0	0	0	0	0	0	0	0	0	0	0	0	0	0	0	0
4930597G03Rik	0	0	0	0	0	0	0	0	0	0	0	0	0	0	0	0	0	0	0	0	0	0	0	0
4930598F16Rik	0	0	0	0	0	0	0	0	0	0	0	0	0	0	0	0	0	0	0	0	0	0	0	0
4930599N23Rik	5.15686	3.80929	2.8807	2.86232	0	3.76572	0.872095	5.20037	11.8653	2.49602	1.20261	3.59546	1.57163	3.42893	7.82844	3.7997	0	8.70968	5.75815	4.07846	5.71202	3.57917	6.42309	7.98233
4931402G19Rik	0	5.79087	0	5.59344	0	0	0	0	0	0	0	0	0	0	0	0	0	0	0	0	0	0	0	0
4931403E22Rik	0	0	0	0	0	0	0	0	0	0	0	0	0	0	0	0	0	0	0	0	0	0	0	0
4931403G20Rik	0	0	0	0	0	0	0	0	0	0	0	0	0	0	0	0	0	0	0	0	0	0	0	0
4931406B18Rik	0	0	0	0	0	0	0	0	0	0	0	0	0	0	0	0	0	0	0	0	0	0	0	0
4931406C07Rik	163.811	228.831	204.733	265.322	221.765	177.54	211.998	238.95	234.237	277.455	262.021	266.573	248.169	283.282	241.127	284.386	267.936	237.332	241.715	215.026	257.711	222.102	237.05	262.561
4931406H21Rik	3.08305	0	0	0	1.07077	0	6.89724	4.48044	17.6029	5.68089	1.2271	1.20986	37.9798	0	0	7.68925	0	0	7.55873	0.809675	3.82589	7.25534	0.916271	5.28984
4931406P16Rik	1651.71	1478.48	1540.16	1617.07	1691.17	1688.27	1573.98	1482.12	1762.54	1940	2115.35	2074.85	1737.75	1855.96	1948.07	2085.81	1690.99	1617.31	1686.21	1559.1	1827.67	1702.09	1807.85	1895.1
4931408C20Rik	0	0	0	0	0	0	0.863061	0	0	0	0	0	0	0	0	0	0	0.97314	0	0	0	0	0	0
4931408D14Rik	0	0	3.86245	0.936774	0	0	0	0	0	0.634933	0	0	0	0	0	0	0	0.970379	0	0	0	0	0	2.65066
4931409K22Rik	0	0	0	0	0	0	0	0	0	0	0	0	0	0	0	0	0	0	0	0	0	0	0	0.883552
4931414P19Rik	92.8283	104.195	139.781	112.005	109.913	123.341	125.917	122.532	114.495	149.254	164.562	111.951	187.099	153.658	121.94	149.091	158.994	112.727	118.125	127.247	147.608	133.421	135.711	114.284
4931417E11Rik	0	0	0	0	0	0	0	0	0	0	0	0	0	0	0	0	0	0	0	0	0	0	0	0
4931419H13Rik	0	0	0	0	0	0	0	0	0	0	0	0	0	0	0	0	0	0	0	0	0	0	0	0
4931420L22Rik	0	0	0	0	0	0	0	0	0	0	0	0	0	0	0	0	0	0	0	0	0	0	0	0
4931422A03Rik	2.02437	0.949706	0	0	4.2604	0	0	0	0	0.608798	0	0	0	0	0	0	0	0	3.82186	2.42716	0	0	0	0
4931423N10Rik	0	0	0	0	0	0	0	0	0	0	0	0	1.62293	0	0	0	0	0	0	0	0	0	0	0
4931428F04Rik	41.1908	60.1886	64.7368	78.7213	109.564	74.0562	45.1102	102.981	30.1234	66.4559	88.1412	40.6269	74.7349	61.8814	57.9963	75.9376	38.8039	49.0261	51.0025	45.91	64.592	68.3991	77.5985	74.6971
4931428L18Rik	0	0	0	0	0	0	0	0	0	0	0	0	0	0	0	0	0	0	0	0	0	0	0	0
4931429L15Rik	0	0	0	0	0	0	0	0	0	0	0	0	0	0	0	0	0	0	0	0	0	0	0	0
4931429P17Rik	0	0	0	0	0	0	0	0	0	0	0	0	0	0	0	0	0	0	0	0	0	0	0	0
4931430N09Rik	0	0	0.963521	0	0	0	0	0	0	0	0	0	0	0	0	0	0	0	0	0	0	0	0	0
4931431B13Rik	0	0	0	0	0	0	0	0	0	0	0	0	0	0	0	0	0	0.962962	0	1.63226	0	0	0	0
4931431C16Rik	0	0	0.969437	2.81529	0	0	0.859932	4.48346	0	0.633572	0	3.63978	3.17411	1.15978	1.99053	0	2.17018	4.8304	0	0.812557	0	5.38903	3.65423	2.65204
4931440F15Rik	9.23438	0.963404	0.951089	2.83965	2.13701	0	1.73341	0	5.35448	1.85943	0	0	0	3.45505	1.94127	3.76053	0	0.982252	3.79383	1.61522	0	5.46953	0.92157	2.64965
4931440J10Rik	0	0	0	0	0	0	0	2.23894	0	2.55399	3.70938	0	0	0	0	0	0	0	0	0	0	2.71694	0	0
4931440P22Rik	6.1822	11.5488	6.5389	4.80389	5.30915	13.6203	10.8607	11.6277	7.45169	4.71037	6.88561	9.14342	0	4.36974	3.75673	3.43027	0	9.0099	5.85968	12.0483	3.68029	13.6832	2.81588	7.11339
4932411N23Rik	0	0	0	0	0	0	0	0	0	0	0	0	0	0	0	0	0	0	0	0	0	0	0	0
4932412D23Rik	0	0	0	0	0	0	0	0	0	0	0	0	0	0	0	0	0	0	0	0.807594	0	0	0	0
4932413F04Rik	0	0	0	0	0	0	0	0	0	0	0	0	0	0	0	0	0	0	0	0	0	0	0	0
4932414J04Rik	0	0	0	0	0	0	0	0	0	0	0	0	0	0	0	0	0	0	0	0	0	0	0	0
4932414N04Rik	0	0	0	0	0	0	0	0	0	0	0	0	0	0	0	0	0	0	0	0	0	0	0	0
4932415M13Rik	2.06341	0	0	0	0	0	0	0	0	0	0	0	3.18337	0	0	0	0	0	0	0	0	0	0	0
4932429P05Rik	0	0	0	0	0	0	0	0	0	0	0	0	0	0	0	0	0	0	0	0	0	0	0	0
4932435O22Rik	5.16095	16.2167	5.9771	4.55548	3.17709	2.57397	9.44584	10.6386	5.51442	16.0535	10.3348	7.39386	17.4472	22.1319	1.02927	3.03522	2.13806	7.73247	6.72822	2.44151	4.87398	5.29285	3.65436	6.19223
4932438A13Rik	1955.9	1630.08	1757.57	1519.8	1546.38	1492.59	1679.06	1454.67	2256.56	1899.08	1755.42	1892.66	2165.48	1461.46	1383.75	1270.94	1404.54	1661.58	1467.96	1422.9	1873.16	1635.82	1549.21	1908.87
4932438H23Rik	0	1.91316	0	0	0	1.27473	2.57809	3.0043	2.77462	4.53273	3.82313	3.32466	1.60248	0	0	0	0	0	0	1.65463	2.6836	5.51795	6.58554	0
4932441J04Rik	1.02253	8.09471	2.16822	2.55553	9.14571	9.59262	7.65873	5.65876	13.9165	2.56153	16.7093	0	4.66958	3.47305	1.18908	2.24754	2.00823	1.92672	6.22685	1.64899	6.04051	7.17845	1.87398	4.57334
4932702P03Rik	4.187	0	0	0	0	0	0	0	2.69512	0.64144	0	0	0	0	0	0	0	0	0	0	0	0.905645	0	0
4933400A11Rik	0	0	0	0	0	0	0	0	0	0	0	0	0	0	0	0	0	0	0	0	0	0	0	0
4933400B14Rik	0	0	0	0	0	0	0	0	0	0	0	0	0	0	0	0	0	0	0	0	0	0	0	0
4933400C23Rik	0	0	0	0	0	0	0	0	0	0	0	0	0	0	0	0	0	0	0	0	0	0	0	0
4933400F21Rik	0	0	0	0	0	0	0	0	0	0	0	0	0	0	0	0	0	0	0	0	0	0	0	0
4933400L20Rik	0	0	0	0	0	0	0	0	0	0	0	0	0	0	0	0	0	0	0	0	0	0	0	0
4933401B06Rik	0	0	0	0	0	0	0	0	0	0	0	0	0	0	0	0	0	0	0	0	0	0	0	0
4933401D09Rik	0	0	0	0	0	0	0	0	0	0	0	0	0	0	0	0	0	0	0	1.61519	0	0	0	0
4933401H06Rik	0	0	0	0	0	0	0	0	0	0	0	0	0	0	0	0	0	0	0	0	0	0	0	0
4933402C06Rik	0	0	0	0	0	0	0	0	0	0	0	0	0	0	0	0	0	0	0	0	0	0	0	0
4933402D24Rik	1.03304	0	0	0	0	0	0	0	0	0	0	0	0	0	0	0	0	0	0	0	0	0	0	0
4933402E13Rik	0	2.85436	1.99083	0.915355	0	0	0	0	0	0.633634	0	0	0	0	0	0	0	0	0	0	0.977352	2.67047	0.914816	0
4933402J07Rik	0	0	0	0	0	0	0	0	0	0	0	0	0	0	0	0	0	0	0	0	0	0	0	0
4933402J10Rik	0	0	0	0	0	0	0	0	0	0	0	0	0	0	0	0	0	0	0	0	0	0	0	0
4933402J15Rik	0	0	0	0	0	0	0	0	0	0	0	0	0	0	0	0	0	0	0	0	0	0	0	0
4933402N03Rik	0	0	0	0	0	0	0	0	0	0	0	0	0	0	0	0	0	0	0	0	0	0	0	0
4933402N22Rik	0	0	0	0	0	0	0	2.23894	0	0	0	0	0	0	0	0	0	0	0	0	0	0	1.82706	0
4933403O08Rik	0	0	0	0	0	0	0	0	0	0	0	0	0	0	0	0	0	0	0	0	0	0	0	0
4933404G15Rik	0	0	0	0	0	0	0	0	0	0	0	0	0	0	0	0	0	0	0	0	0	0	0	0
4933404K08Rik	0	0	0	0	0	0	0	0	0	0	0	0	0	0	0	0	0	0	0	0	0	0	0	0
4933404K13Rik	0	0	0	0	0	0	0	0	0	0	0	0	0	0	0	0	0	0	0	0	0	0	0	0
4933404O12Rik	14.4825	13.4925	17.3342	18.9923	20.342	27.6314	27.5376	16.4174	28.342	24.7188	39.1033	25.4413	11.1036	28.9294	45.0961	27.0286	26.1112	26.1317	24.5602	28.4125	20.1379	19.0061	27.3808	22.8777
4933405D12Rik	0	0	0	0	0	0	0	0	0	0	0	0	0	0	0	0	0	0	0	0	0	0	0	1.7671
4933405E24Rik	0	0	0	0	0	0	0	0	0	0	0	0	0	0	0	0	0	0	0	0	0	0	0	0
4933405L10Rik	0	0	0	0	0	0	0	0	0	0	0	0	0	0	0	0	0	0	0	1.61519	0	0	1.82706	0
4933405O20Rik	0	0	0	0	0	0	0	0	0	0	0	0	0	0	0	0	0	0	0	0	0	0	0	0
4933406C10Rik	1.04309	6.72806	0	0.953856	1.0724	8.83741	5.17272	5.97016	13.4501	8.31121	3.65659	2.43619	7.96824	4.61686	5.92226	12.7159	0	0	0.946839	7.31408	5.75591	1.78403	0	2.63786
4933406D12Rik	0	0	0	0	0	0	0	0	0	0	0	0	0	0	0	0	0	0	0	0	0	0	0	0
4933406F09Rik	1.04577	0.951666	0	0	0	0	0	0	0	1.92239	0	0	0	0	0	0	0	0	0	0	0.961989	0	0	0
4933406G16Rik	0	0	0	0	0	0	0	0	0	0.637546	0	0	0	0	0	0	0	0	0	0	0	0	0	0
4933406I18Rik	0	0	0	0.932727	0	0	0	0.742747	0	0	0	0	0	0	0	1.05705	0	0	0	0	0	0	0	3.49705
4933406J09Rik	0	0	0	0	0	0	0	0	0	0	0	0	0	0	0	0	0	0	0	0	0	0	0	0
4933406J10Rik	0	0	0	0	0	0	0	0	0	0	0	0	0	0	0	0	0	0	0	0	0	0	0	0
4933406K04Rik	0	0	0	0	0	0	0	0	0	0	0	0	0	0	0	0	0	0	0	0	0	0	0	0
4933406M09Rik	0	0	0	0	0	0	0	0	0	0.635786	0	0	0	2.32221	0	0	0	0	0	0	0	0	0	0.882864
4933407E24Rik	0	0	1.9088	8.56881	4.25614	0	5.19347	0	0	12.4397	2.42199	7.14448	6.31538	6.92087	6.82832	4.72922	6.56902	10.7434	0.952548	3.24075	3.81738	12.7184	12.858	20.4119
4933407G14Rik	0	0	0	0	0	0	0	0	0	0	0	0	0	0	0	0	0	0	0	0	0	0	0	0
4933407I05Rik	0	0	0	0	1.06806	0	0	0	0	0	0	0	0	0	0	0	0	0	0	0	0	0	0	0
4933407K13Rik	28.8852	21.0289	38.1997	35.76	25.4137	37.2115	38.848	36.88	32.9246	45.0773	45.7814	36.4418	49.322	32.5158	42.7183	32.7476	39.1091	57.9228	48.1692	35.7185	33.9555	70.693	33.5963	50.5798
4933407L21Rik	0	0	0	0	0	0	0	0	0	0	0	0	0	0	0	0	0	0.97314	0	0	0	0	0	0
4933408B17Rik	7.14828	4.44568	5.75609	8.79201	7.27189	19.1947	11.2615	9.28003	32.6317	10.5638	6.59668	17.8608	23.2168	19.867	3.4551	13.0981	14.1485	12.5822	10.4747	12.1734	3.01704	3.52604	15.6047	10.0313
4933408J17Rik	0	0	0	0	0	0	0	0	0	0.632347	0	2.43169	0	0	0	0.97376	4.3268	0	0	0	0	0.895362	0	0.882468
4933408N05Rik	0	0	0	0	0	0	0	0	0	0	0	0	0	0	0	0	0	0	0	0	0	0	1.82706	0
4933409F18Rik	0	0	0	0	0	0	0	0	0	0	0	0	0	0	0	0	0	0	0	0	0	0	0	0
4933409G03Rik	0	0	0	0	0	0	0	0	0	0	0	0	0	0	0	0	0	0	0	0	0	0	0	0
4933409K07Rik	10.343	11.575	5.79136	8.51682	14.9975	6.28736	11.1852	19.3948	39.3341	5.0842	15.9352	15.7823	6.36152	6.95698	10.802	7.74958	23.9483	10.6397	15.1027	7.29674	3.84023	24.4106	6.37979	3.51738
4933411E08Rik	1.04036	0	0	0	5.35252	0	0	0	0	2.55829	0	0	0	0	0	0	0	0	2.82619	0	0	0	0	1.7671
4933411G06Rik	0	0	0	0	0	0	0	0	0	0	0	0	0	0	0	0	0	0	0	0	0	0	0	0
4933411K16Rik	2.05068	0	3.83852	0.950064	4.26821	2.50139	1.72211	3.74998	2.67008	1.24687	8.57265	4.81868	3.13909	1.14978	0	0.95324	2.16134	6.87152	0	2.43603	0.954736	7.26706	0	3.55377
4933412E12Rik	24.7957	30.2414	21.3565	39.5647	29.9718	37.8757	28.1722	28.1509	39.5635	45.8201	77.6919	53.2482	43.5384	39.9258	39.1965	47.3012	19.2588	45.1179	52.3509	18.1019	27.3475	23.6485	27.0293	32.0075
4933412E24Rik	0	0	0	0	0	0	0	0	0	0	0	0	0	0	0	0	0	0	0	0	0	0	0	0
4933412O06Rik	0	0	0	0	0	0	0	0	0	0	0	0	0	0	0	0	0	0	0	0	0	0	0	0
4933413J09Rik	0	0	0	0	0	0	0	0	0	0	0	0	0	0	0	0	0	0	2.84242	0	0	0	0	0
4933413L06Rik	0	0	0	0	0	0	0	0	0	0	0	0	0	0	0	0	0	0	0	0	0.961989	0	0	0
4933415F23Rik	0	0	0	0	0	0	0	0.746314	0	0	0	0	0	0	0	0	0	0	0	0	0	0	0	0
4933416C03Rik	0	0	0	0	0	0	0	0	0	0	0	0	0	0	0	0	0	0	0	0	0	0	0	0
4933416E03Rik	0	0	0	0	0	0	0	0	0	0	0	0	0	0	0	0	0	0	0	0	0.961989	0	0	0
4933416I08Rik	0	0	0	0	0	0	0	0	0	0	0	0	0	0	0	0	0	0	0	0	0	0	0	0
4933416M06Rik	0	0	0	0	0	0	0	0	0	0	0	0	0	0	0	0	0	0	0	0	0	0	0	0
4933416M07Rik	0	0	0	0	0	0	0	0	0	0	0	0	0	0	0	0	0	0	0	0	0	0	0	0
4933416O17Rik	0	0	0	0	0	0	0	0	0	0	0	0	0	0	0	0	0	0	0	0	0	0.905645	0	0
4933417A18Rik	0	0	0	0	0	0	0	0	0	0	0	0	0	0	0	0	0	0	0	0	0	0	0	0
4933417D19Rik	12.3752	7.64114	15.3846	2.85789	2.12951	13.8204	8.63817	6.75515	17.3011	12.4866	14.6722	15.6483	9.43298	8.05246	4.91283	10.5257	2.16529	9.75529	11.4549	10.5857	4.77645	6.30947	5.53172	15.0788
4933417E11Rik	0	0	0	0	0	0	0	0	0	0	0	0	0	0	0	0	0	0.97314	0	0	0	0	0	0
4933417G07Rik	0	0	0	0	0	0	0	0	0	0	0	0	0	0	0	0	0	0	0	0	0	0	0	0
4933417O13Rik	2.08876	0	0	0	0	0	3.44407	2.9975	1.3433	0.633136	1.22876	0	0	2.30969	0	0.968635	0	0	0	0	3.84114	3.60163	0	0
4933421I07Rik	0	0	0	0	0	0	0	0	0	1.26727	0	0	0	0	0	0	0	0	0	0	0	0	0	0
4933421O10Rik	84.7356	74.6864	80.6602	76.4624	59.4081	86.8131	99.8817	77.8867	121.195	110.274	101.234	91.6945	123.106	91.6632	109.327	84.1991	90.117	76.7128	61.3084	70.7743	77.4661	68.6719	94.4173	104.314
4933422A05Rik	0	0	0	0	3.20419	0	0	0	0	0	0	0	0	0	0	0	0	0	0	0	0	0	0	0
4933424G05Rik	0	1.91742	0	2.82072	6.43536	0	0.86506	1.50154	0	0.641682	0	0	0	2.32099	1.00342	0	2.16483	0	0.949612	0	0	0	1.81557	0.880313
4933424G06Rik	5.18782	0	0	0	0	1.26783	2.58605	0	0	0	1.24248	0	0	0	0	4.9123	0	0.96515	1.90501	0	0.961714	0.888738	3.65927	0
4933424L21Rik	0	0	0	0	0	0	0	0	0	0	0	0	0	0	0	0	0	0	0	0	0	0	0	0
4933425B07Rik	0	0	0	0	0	0	0	0	0	0	0	0	0	0	0	0	0	0	0	0	0	0	0	0
4933425L06Rik	0	0	0	0	0	0	0	2.23894	0	1.93025	0	0	0	0	0	0	0	0	0	0	0	0	0	0
4933427D06Rik	0	0	0	0	0	0	0	0	0	0	0	0	0	0	0	0	0	0	0	0	0	0	0.913531	0
4933427D14Rik	145.992	136	161.04	171.674	149.687	136.885	134.572	141.548	159.73	194.135	230.307	186.406	174.351	190.346	136.294	193.933	187.388	152.973	150.407	154.674	130.287	159.411	115.367	121.185
4933427E11Rik	0	0	0	0	0	0	0	0	0	1.87589	0	0	3.16671	0	0	1.91042	0	2.89618	0	2.43672	0.955706	0.900096	0.91475	0
4933427E13Rik	0	0	0	0	0	0	0	0	0	0	0	0	0	0	0	0	0	0	0	0	0	0	0	0
4933427I22Rik	0	0	0	0	0	0	0	0	0	0	0	0	0	0	0	0	0	0	0	0	0	0	0	0
4933428C19Rik	0	0	0	0	0	0	0	0	0	0	0	0	0	0	0	0	0	0	0	0	0	0	0	0
4933428G20Rik	0	0	0	0	1.07033	1.25473	6.93087	0	2.67219	0	0	0	0	2.29608	0	0	0	0	0	0	0.955088	1.81754	0	0
4933428M09Rik	0	0	0	0	0	0	0	0	0	0	0	0	0	0	0	0	0	0	0	0	0	0	0	0
4933429K18Rik	0	0	0	0	0	0	0	0	0	0	0	0	0	0	0	0	0	0	0	0	0	0	0	0
4933429O19Rik	0	0	0	0	0	0	0	0	0	0	0	0	0	0	0	0	0	0	0	0	0	0	0	0
4933430H16Rik	0	0	0	0	0	0	0	0	0	0	0	0	0	0	0	0	0	0	0	0	0	0	0	0
4933430I17Rik	0	4.81626	0	0	5.36253	1.26275	0	3.74694	2.67859	5.71038	1.21803	6.06287	0	0	9.09094	0.96443	4.34662	0	0	0	2.84415	3.54259	0	8.07261
4933430M04Rik	0	0	0	0	0	0	0	0	0	0	0	0	0	0	0	0	0	0	0	0	0	0	0	0
4933430N04Rik	0	0	0	0	0	0	0	0	0	0	0	0	0	0	0	0	0	0	0	0	0	0	0	0
4933431E20Rik	106.539	128.159	93.3461	165.913	166.955	141.558	132.545	148.593	182.831	210.225	178.123	155.699	186.338	147.484	151.461	248.913	135.024	207.6	136.307	166.816	192.376	178.012	178.373	170.661
4933431G14Rik	0	0	0	0	0.877534	1.3961	0	3.2849	0	0	0	0	0	1.00081	3.48274	0	0	1.94628	0	0	0	0	0	0
4933432G23Rik	0	0	0	0	0	0	0	0	0	0	0	0	0	0	0	0	0	0	0	0	0	0	0	0
4933432I03Rik	0	0.951352	1.00469	0	1.06845	0	0.863	0	5.40664	0.640274	0	0	0	0	3.00419	0	0	0	0	0	3.83762	0	0.902072	2.63897
4933432I09Rik	13.6111	19.4542	7.77538	3.44172	5.48693	21.9605	14.2711	17.8493	23.9646	10.5693	8.50463	16.7425	1.57229	10.3549	13.6853	3.79037	6.53819	17.6229	7.64212	10.5647	23.8421	17.2027	12.9232	8.88182
4933432K03Rik	0	0.964641	0	0	0	0	0	0	0	0	0	0	0	0	0	0	0	0	0	0	0	0	0	0
4933433F19Rik	0	0	0	0	0	0	0	0	0	0	0	0	0	0	0	0	0	0	0	0	0	0	0	0
4933433G08Rik	0	0	0	0	0	0	0	0	0	0	0	0	0	0	0	0	0	0	0	0	0	0	0	0
4933433G15Rik	1.03161	0	0.964513	0	0	1.26112	0	0	0	2.5135	0	0	6.35664	1.15281	0	0	4.3679	0.961198	0	3.2535	0	0	1.8226	0.885336
4933433G19Rik	0	0	0	0	1.05943	0	0	0.752397	0	0	0	0	0	0	0	0	0	0	0	2.42278	0	0	0	0
4933433H22Rik	0	0.963084	0	0	0	0	0	0	0	0	0	0	0	1.15523	0	0	4.326	0	0	0.813044	0	0	0	0
4933434E20Rik	1042.89	999.758	1180.92	1210.74	1182.11	1215.95	1193.08	1124.14	1353.18	1401.31	1291.13	1209.29	1280.39	1382.02	1178.47	1316.71	991.837	1087.74	1063.01	1004.49	1034.49	1226.32	1214.95	1156.06
4933436E23Rik	0	0	0	0	0	0	0	0	0	0	0	0	0	0	0	0	0	0	0	0	0	0	0	0
4933436H12Rik	0	0	0	0	0	0	0	0	0	0	0	0	0	0	0	0	0	0	0	0	0	0	0	0
4933436I01Rik	0	0	0	0	0	0	0	0	0	0	0	0	0	0	0	0	0	0	0	0	0	0	0	0
4933438B17Rik	0	0	0	0	0	0	0	0	0	0	0	0	0	0	0	0	0	0	0	0	0	0	0	0
4933438K21Rik	0	0	0	0	0	0	0	0	0	0	0	0	0	0	0	0	4.3552	0	0	0	0	0	0.913531	0
4933439C10Rik	34.3157	84.0697	65.535	41.701	49.2952	45.2458	63.7384	67.547	63.4673	78.4733	51.9917	56.8051	78.3974	54.7448	48.3527	75.4143	50.7395	65.084	88.7941	46.4002	66.3998	44.869	63.5079	74.0546
4933439K11Rik	2.07299	2.8604	1.94062	0	1.06578	0	1.73122	4.53035	0	3.11038	0	1.20379	3.13344	0	0	0	0	0.968476	2.862	0	0.963	0	0	0
4933440J02Rik	0	0	0	2.73699	0	0	0	0.759573	0	0	0	2.49464	0	0	0	0	0	0	2.85669	0	0	0.905645	0	0
4933440M02Rik	0	0	0	0	0	0	0	0	0	0	0	0	0	0	0	0	0	0	0	0	1.92398	0	0	0
5031410I06Rik	7.2034	2.84297	0.994397	10.0175	4.24777	6.44322	3.44371	0	0	1.93378	1.28439	3.70925	4.76867	3.4927	8.22431	4.05581	6.43014	1.9194	1.92082	0	0	1.75831	0	6.19176
5031425E22Rik	236.988	238.442	238.577	204.77	241.981	266.163	279.101	299.737	311.15	266.559	337.047	297.152	310.486	266.71	287.991	273.545	166.347	271.951	239.586	206.59	278.528	236.616	204.662	288.746
5031425F14Rik	6.15934	9.61008	8.50913	4.7616	1.06597	3.74883	9.59668	7.43736	0	12.9104	8.40628	7.10521	3.12996	5.74053	1.93872	14.9306	6.55801	3.92241	6.67113	7.29029	8.53818	5.46185	6.48347	8.8794
5031426D15Rik	0	3.79095	0	5.33381	6.40581	11.9448	5.21168	0	5.62236	10.3818	14.7589	15.0101	30.2772	4.68564	2.127	4.19476	0	6.71531	0	0	1.96582	16.3606	2.72776	1.77015
5031434C07Rik	0	2.87535	0	0	0	2.55382	1.72372	0	0	5.73657	0	0	0	0	0	0	2.17754	3.88931	0	0	6.76722	0	0.911098	6.17087
5031434O11Rik	9.28253	2.84401	1.95763	8.53204	11.691	1.26443	5.18632	4.5261	9.34736	4.39536	11.1637	4.86424	7.85189	8.05223	7.97073	0.975967	2.14575	3.88769	4.78994	8.16355	11.515	2.66743	6.45205	2.66429
5031439G07Rik	1317.13	1177.33	1287.55	1197.98	1256.82	1263.19	1112.61	1245.65	1449.43	1555.59	1528.36	1555.71	1265.31	1528.99	1564.98	1453.61	1228.66	1279.75	1198.74	1427.99	1429.93	1374.11	1447.64	1286.4
5033403F01Rik	0	0	6.08718	0.906915	5.27288	0	0.862961	0	1.38186	1.28158	0	1.24656	0	0	0	0	0	0	1.96034	3.27297	2.94559	1.73224	0.923841	2.68522
5033403H07Rik	0	0	0	0	0	0	0	0	0	0	0	0	0	0	0	0	0	0	0	0	0	0	0	0
5033404E19Rik	0	0	0	0	0	0	0	0	0	0	0	0	0	0	0	0	0	0	0	0	0	0	0	0
5033406O09Rik	4.13325	19.1941	4.80256	22.7881	13.8835	18.861	14.6908	11.9405	20.0982	10.6876	18.247	19.228	23.7352	25.3597	6.85914	7.66557	8.74122	14.5521	15.2312	8.1272	18.1917	21.6596	39.3066	18.5843
5033417F24Rik	5.4448	7.57898	16.4896	11.2542	5.59221	32.1725	6.76691	14.6764	20.3778	34.1929	20.2818	8.29385	23.3632	26.0812	10.6046	9.49297	23.6652	15.2511	7.50011	29.0348	13.9175	15.2003	25.4196	13.165
5033428I22Rik	5.14228	1.89312	13.8072	3.66398	3.14649	2.56773	8.63665	8.43488	5.39734	5.05099	26.9719	6.11277	1.55716	6.95176	14.3836	12.966	12.6959	8.80715	1.93985	18.8646	12.6466	6.20789	14.8279	17.8471
5330411J11Rik	0	0	0	0	0	0	0	0	0	0.635577	0	0	0	0	0	0	4.33218	0	0	0	0	0	0	0
5330413P13Rik	7.22431	8.64495	7.78821	4.64852	4.27324	1.26793	0	0	5.47392	17.9084	21.1711	8.54142	3.18435	4.65203	3.9806	6.88594	0	1.92905	0.947006	10.5332	1.93286	8.07701	2.72676	2.63911
5330416C01Rik	0	0	0	0	1.06806	0	0	0	0	0.633634	0	0	0	3.48106	0	0	1.48845	1.30345	2.5828	7.18259	4.85504	0.895795	2.73331	0
5330417C22Rik	2.06862	4.81299	10.7131	0	6.41452	0	0.86055	3.74259	0	7.50848	0	2.44444	1.61545	0	9.34246	0	2.18145	0	0	0.813437	0	0.916789	0	0.899345
5330434G04Rik	0	0	0	0	0	0	0	0	0	0	0	1.20826	0	0	0	0	0	0	0	0	0	0	0	0
5330439B14Rik	0	0	0	0.932727	0	0	0	0.751939	2.72832	0	0	0	0	0	0	0	0	3.83177	0.958295	0	0	0	0	0
5430401F13Rik	0	0	0	0	0	0	0	0	0	0	0	0	0	0	0	0	0	0	0	0	0	0	0	0
5430402E10Rik	0	0	0	0	0	0	0	0	0	0	0	0	0	0	0	0	0	0	0	0	0	0	0	0
5430402O13Rik	7.20484	8.53608	0.982736	11.1002	6.34516	8.95102	9.5596	14.3401	12.2062	10.0858	7.64326	3.65511	1.58204	6.94127	10.2134	0.988175	0	9.72327	17.6184	12.1772	1.95967	1.78528	3.51508	4.26399
5430403N17Rik	0	0	0	0	0	0	0	0	0	0	0	0	0	0	0	0	0	0	0	0	0	0	0	0
5430405H02Rik	31.0226	38.6747	31.0496	22.9207	36.2341	14.5697	28.1067	29.8512	25.0762	32.8271	31.7594	48.7403	42.8256	22.5143	48.9875	45.4868	33.9574	40.315	32.4117	18.0319	33.4361	35.9609	19.331	25.1378
5430416N02Rik	9.2827	11.2239	22.694	12.0356	13.611	14.1654	20.908	10.6542	22.5292	11.1672	3.80377	18.0771	17.1977	17.2055	11.3161	10.8033	10.7892	13.6104	9.8913	6.56716	10.6155	8.69663	7.40561	15.3207
5430419D17Rik	4.13432	13.4816	9.65786	23.6214	14.9848	15.1041	9.47419	5.22392	4.06483	11.4022	2.45263	3.63435	22.2444	6.95041	2.94659	7.73659	10.8923	15.4941	12.2969	7.29341	7.67558	11.7336	17.3374	2.64228
5430421F17Rik	0	0	0	1.88856	0	0	0	0.746069	0	0	0	1.21084	0	0	0	0	0	0	1.88477	0	0	0	2.73699	3.53886
5430425K12Rik	3.09511	0	0	0	0	0	1.72545	0.750504	0	0	3.77762	0	0	0	0	0	0	0	0	2.42621	0.969116	0	2.72131	2.6498
5430427M07Rik	0	0	0	0	0	0	0	0	0	0	0	0	0	0	0	0	0	0	0	0	0	0	0	0
5430427O19Rik	1.02491	14.9119	14.5783	9.51718	11.3951	9.322	22.2617	13.3932	6.98683	16.1382	42.2197	12.5619	7.83579	11.6659	8.9131	9.68646	14.4503	4.85617	12.9688	18.0803	7.97479	16.0629	19.4587	10.7855
5430428K19Rik	0	0	0	0	0	0	0	0	0	0	0	0	3.1446	0	0	2.10546	0	0	0.947474	0	0	0	0	0
5430431A17Rik	212.017	188.939	113.979	133.889	178.204	110.879	147.35	117.274	206.907	190.892	130.377	159.954	180.435	156.951	117.596	126.807	119.126	169.849	156.88	102.362	113.871	133.907	130.761	121.109
5430434I15Rik	0	0	0	0	0	0	0	0	0	0	0	0	0	0	0	0	0	0	0	0	0	0	0	0
5430437J10Rik	0	0	0	1.86545	0	0	0	0	0	1.86384	1.26126	0	0	0	0	0	0	0.963033	0	0	1.92745	0	0.911691	7.95368
5430440P10Rik	1.03619	1.92094	0	0	0	0	0	2.99688	0	1.24186	0	0	0	0	0	0	0	4.87816	0	0	0	0	0	0.883552
5530400C23Rik	0	0	0	0	0	0	0	0	0	0	0	0	0	0	0	0	0	0	0	0	0	0	0	0
5530401A14Rik	0	0	0	0	0	0	0	0	0	0	0	0	0	0	0	0	0	0	0	0	0	0	0	0
5530601H04Rik	20.4577	26.2249	39.1071	18.9397	14.4299	30.5039	16.3587	22.8969	55.6178	59.2648	36.1017	36.2673	52.5247	47.9973	39.6596	58.5106	47.1298	56.9248	29.7588	43.7383	40.8211	48.3814	48.4725	51.1928
5730403I07Rik	0	0	0	0	0	0	0	2.23894	0	0	0	0	0	3.55695	0	0	0	0	0	0	0	0	0	0
5730405O15Rik	9.32625	7.60392	2.99751	11.1132	1.06262	1.28064	4.31508	0.754242	2.72429	5.13295	1.26072	6.14397	17.4602	4.64102	3.0445	5.02433	6.46799	4.8008	1.91844	11.421	5.81792	14.0697	6.36677	6.19027
5730408K05Rik	4.11779	12.8294	2.93784	0.966712	0	3.79246	1.74345	3.80506	3.79344	1.22182	3.65591	2.39177	6.16156	14.6032	3.02087	0	2.14351	2.92357	5.98296	2.4979	5.71645	6.07469	0.938549	0.910266
5730409E04Rik	373.82	398.843	476.073	427.819	481.208	461.73	451.027	528.349	437.55	625.963	640.809	584.397	513.972	562.95	623.12	661.326	550.707	503.193	492.156	536.872	616.027	602.296	525.201	512.236
5730412P04Rik	0	0	0	0	0	0	0	0	0	0	0	0	0	0	0	0	0	0	0	0	0	0	0	0
5730416F02Rik	0	0	0	3.73091	0	0	0	0	0	0	0	0	0	0	0	0	0	0	0	0	0	0	0	0
5730420D15Rik	0	2.86665	3.8698	0	5.33516	2.53589	8.67744	0	2.67903	0	2.44304	2.41072	0	0	3.94044	0.962477	0	0	0.958495	0.81411	0.960085	4.45987	6.37917	4.43806
5730422E09Rik	2.08553	1.92792	0	0	2.14684	0	0	0.747689	1.35457	1.91695	1.22738	0	0	1.1554	1.96825	0.971781	2.18509	0	0	0	0.956528	0	0	0
5730435O14Rik	0	0	0	0	0	0	0	0	0	0	0	0	0	0	0	0	0	0	0	0	0	0	0	0
5730455P16Rik	1032.94	962.529	1078.95	882.057	1025.05	901.587	1080.17	983.373	1392.54	1239.3	1202.24	1192.46	1274.31	963.511	1063.68	1000.1	1085.89	972.375	1015.9	823.685	1029.63	1052.28	1008.63	1078.63
5730460C07Rik	0	0.964641	0	0	1.07288	0	0	0	0	0.633634	0	0	0	0	0	0	0	1.93874	0	0	0	0	0	0
5730480H06Rik	12.3	13.9296	16.725	30.3324	23.8301	4.00829	22.1814	16.5158	25.2691	25.7618	8.54246	6.30635	12.6204	19.8576	23.5159	11.9097	2.07111	21.263	19.0004	13.0928	12.9879	15.8659	1.84495	22.4661
5730488B01Rik	0	0	0	0	0	0	0	0	0	0	0	0	0	0	0	0	0	0	0	0	0	0	0	0
5730507C01Rik	6.16103	6.48395	2.11016	2.57496	7.20598	1.34987	1.70274	4.74985	1.39545	5.70398	8.74224	8.78588	1.56199	17.3852	1.13616	4.31491	6.16468	2.9128	16.2159	4.88848	0.998107	2.4707	4.64875	7.22079
5730522E02Rik	1.04306	0	0	5.53545	1.07348	0	0	0	0	0	0	0	0	0	0	0	2.14038	1.94124	0	1.64755	0	0	0	0
5830408C22Rik	0	0	2.00033	0	1.04553	0	0	0	1.26582	2.47716	0	0	0	0	0	0	0	4.91424	1.01347	0	0	0	0	0
5830411N06Rik	0	0	0	0	0	0	0	0	0	0	0	0	0	0	0	0	0	0	0	0	0	0	0	0
5830416I19Rik	1.02067	0	1.94788	0	0	0	0.854907	4.50269	5.48899	4.47407	0	8.58329	0	1.15678	2.01245	1.98375	0	0.966299	2.86129	3.24949	0	0.887579	2.72972	0
5830417I10Rik	1410.45	1342.89	1620.66	1310.63	1761.67	1652.29	1650.94	1653.29	1840.69	1713.23	2083.6	1584.81	2273.17	2002.96	2209	1724.33	1311.59	1195.53	1224.27	1344.09	1534.85	1516.71	1498.16	1589.16
5830418P13Rik	9.30872	13.4556	5.78826	9.48701	8.55738	15.0932	8.61401	5.22644	12.1272	13.2672	18.3324	27.8302	14.2714	11.5645	16.6755	10.6055	4.3549	16.4657	24.641	29.2168	23.9651	24.3537	17.3667	14.1129
5830428M24Rik	0	0	0	0	0	0	0.863061	0	0	0	1.24599	0	1.59426	0	0	0	0	0	0	0	0.974508	4.47138	0	0
5830432E09Rik	9.27456	11.4566	8.7217	5.63359	3.19178	10.1249	32.806	11.2754	6.73184	6.27134	4.96394	12.069	18.9568	6.92323	21.8653	8.71011	0	11.6825	10.5368	2.43507	10.5629	15.2154	8.26773	14.2099
5830444B04Rik	23.4657	22.5879	33.996	26.5859	35.6852	20.3485	23.2091	30.0791	25.2903	30.0955	73.1107	3.4643	20.7611	43.1893	55.2793	16.6031	8.72648	9.3628	75.7533	22.003	29.9194	42.9391	45.4182	18.962
5830454E08Rik	16.4972	12.3266	10.5153	12.4661	16.9305	11.3072	19.2238	9.74727	14.3322	9.86455	24.1067	16.6436	10.8942	9.12042	16.7037	30.1989	4.3542	21.4652	9.67106	6.56533	11.4194	14.356	13.9003	11.6178
5830473C10Rik	0	0	0	0	0	0	0	1.49263	0	0	0	0	0	0	0	0	0	0	0	0	0	0	0	0
5930403L14Rik	505.189	526.527	538.223	451.191	594.395	512.078	595.867	498.074	484.015	460.969	635.356	546.7	596.309	612.845	535.646	501.72	440.493	479.975	393.448	582.859	594.417	601.092	512.265	614.39
5930412G12Rik	3.09511	0	0	0	0	0	0	0	4.08132	0	1.24006	0	0	0	2.95127	0.965547	0	0	0	0	0	0	0	0
5930430L01Rik	58.6953	75.6526	81.8184	59.6283	60.4305	47.746	76.773	88.2956	114.106	114.832	86.6445	66.9317	133.68	136.978	115.87	105.8	44.6443	94.6214	79.9577	78.5797	83.2479	74.1555	86.8126	96.2488
5930438M14Rik	0	1.94407	0	0.925633	0	0	0	0	0	0	0	2.41652	0	0	0	1.93003	6.47049	0	0	0	0	0	0	0
6030407O03Rik	1.03326	0	1.93226	0	10.6455	0	0	1.49699	0	5.70049	2.46791	0	1.58606	2.31756	2.97578	0	2.17657	0	0	0	0.963273	0	0	2.64942
6030408B16Rik	46.5501	35.5655	48.5043	27.2433	34.2296	29.0678	10.4019	28.2149	24.4022	19.6471	26.8453	36.156	35.066	31.2226	14.7603	39.6723	6.60381	22.1519	60.8318	46.2055	23.9648	15.2492	44.4425	21.1792
6030440G07Rik	0	0	0	0	0	0	0	0	0	0	0	0	0	0	0	0	0	0	0	0	0	0	0	0
6030443J06Rik	8.25233	13.3341	18.0004	15.4167	9.52554	14.2058	14.573	15.9862	2.77137	14.7666	13.0441	18.5251	15.9011	10.498	12.4389	19.3287	4.27414	22.2264	6.75008	1.62467	13.6783	17.5252	5.48243	10.6315
6030458C11Rik	487.789	560.421	463.388	530.324	396.031	452.626	500.387	419.589	676.727	577.622	608.225	591.116	580.779	542.032	471.646	598.198	499.572	471.955	463.055	476.197	494.326	563.82	562.6	518.76
6030466F02Rik	0	0.964641	0	0	0	0	0	0	0	0	0	0	0	0	0	0	0	0	0	0	0	0	0	0
6030468B19Rik	0	0	0	0	0	0	0	0	0	0	0	0	0	0	0	1.93003	0	0	0	0	0	0	0	0
6030469F06Rik	0	0	0	0	0	0	0	0	0	0.636517	0	0	0	0	0	0	0	0	0	0	1.92398	0	0	0
6030471H07Rik	0	0	0	0	0	0	0	0	0	0	0	0	0	0	0	0	0	0	0	0	0	0	0	0
6030498E09Rik	0	0	0	0	0	0	0	0	0	0	0	0	0	0	0	0	0	0	0	0	0	0	0	0
6230400D17Rik	12.2969	8.48854	0	2.71372	2.09974	2.60218	17.4625	20.1234	0	1.87467	1.31461	6.06722	9.38997	5.78834	4.2318	0	4.23425	0	1.97193	6.53461	17.5744	6.10412	8.42423	11.7389
6330403K07Rik	0	6.73839	2.88571	0	0	3.78683	10.4328	8.2074	2.68181	7.52099	3.63995	5.98288	18.9995	1.15295	5.87463	8.58037	2.19943	1.9412	0.954539	0.811614	8.61297	0.901558	0.914015	1.77307
6330407A03Rik	0	0	0	0	0	0	0	0	0	0	0	0	0	0	1.9686	0	0	0	0	0	0	0	0	0.867045
6330409D20Rik	0	0	0	0	0	0	0	0	0	0	0	0	0	0	0	0	0	0	0	0	0	0	0	0
6330410L21Rik	8.26778	13.3083	20.0849	10.0216	12.7094	1.29152	29.1353	10.637	16.6108	28.902	28.6674	9.90867	11.1488	27.9698	11.4105	15.3018	2.13888	17.3045	2.89146	0.812528	3.89793	2.6125	8.20884	15.9298
6330415B21Rik	0	0	0	0	0	0	0	0	0	0	0	0	0	0	0	0	0	0	0	0	0	0	0	0
6330415G19Rik	7.50551	2.97522	0	1.82258	13.1261	5.63733	4.22178	0	2.4895	7.62592	9.08157	0	2.61634	5.7175	8.52744	11.2462	0	2.65684	3.05372	7.39286	14.6869	0.73337	5.96842	2.15633
6330418K02Rik	3.10814	12.2879	17.6814	11.405	0	21.5322	11.209	24.0903	15.9501	14.4247	21.059	23.1227	28.3429	13.7925	12.9965	13.6779	15.0822	18.345	8.66539	17.9813	22.9994	15.8599	12.8795	16.8902
6330549D23Rik	8.27971	2.88226	1.96546	0.931191	4.26989	1.27088	3.44104	10.4965	5.47949	7.70035	7.51079	6.12357	1.59903	10.4888	14.0827	0	8.65832	8.65415	15.1888	3.24942	1.94041	5.36648	8.1902	7.93994
6430411K18Rik	0	0	0	0	0	0	0	0	0	0	0	0	0	0	0.983506	0	0	2.91942	0	0	3.82459	0	0	0
6430503K07Rik	0	0.964641	0	0	0	0	0	0	0	0	0	0	0	0	0	0	0	0	0	0	0	0	0	0
6430531B16Rik	0	0	0	0	0	0	0	0	0	1.86658	0	0	0	0	0	0	0	0	0	0	0	0	0	0
6430548M08Rik	663.007	645.086	523.689	634.85	722.115	654.887	601.838	584.736	917.928	960.924	772.168	969.045	863.989	869.805	954.639	931.819	986.833	1020.45	1015.17	1119.22	1118.4	1066.68	1216.61	1064.33
6430550D23Rik	3.29818	3.04383	3.41293	4.95374	3.30273	14.424	12.0538	6.16315	4.93201	4.62254	2.76532	2.71754	1.6978	4.92945	5.33121	9.52377	14.0755	18.6078	2.50416	2.63186	8.28607	16.1606	3.12826	5.58265
6430553K19Rik	0	0	0	0	0	0	0.863061	0	0	0	0	0	0	0	0	0	0	0	0	0	0	0	0	2.65066
6430562O15Rik	34.0974	26.8811	37.7573	31.3332	76.0424	35.1791	49.9842	39.6073	43.1039	42.3409	67.2034	67.8165	44.3691	21.942	50.0525	74.3232	28.2628	47.5085	46.4384	43.8283	50.7549	49.5803	91.5423	71.4603
6430571L13Rik	150.43	151.036	118.78	142.947	158.922	167.531	115.823	142.826	167.255	125.41	152.099	114.048	121.679	225.433	153.39	144.502	148.318	138.553	110.49	174.282	128.342	195.627	180.672	180.638
6430584L05Rik	9.33645	7.68199	1.96044	15.9393	8.55628	7.60862	3.43218	9.72913	2.72738	8.31307	11.1887	11.008	14.3653	10.4559	6.96974	1.96953	8.69392	2.8842	9.4901	7.29758	11.5767	8.02803	20.9109	6.16003
6430628N08Rik	0	0	0	0	0	0	0	0	0	0	0	0	0	0	0	0	0	0	0	0	0	0	0	0
6430706D22Rik	592.01	558.385	518.969	477.898	771.911	630.574	609.9	653.138	558.909	778.511	747.943	793.684	724.964	776.86	710.515	763.148	567.525	599.354	513.281	485.079	643.461	672.366	627.094	523.768
6430710C18Rik	27.9046	22.9008	13.7962	2.77069	24.3461	15.362	8.60088	12.1055	29.8154	18.3505	21.4903	12.1848	6.27679	24.2369	25.2327	4.95894	0	8.67249	10.5163	21.1374	1.94087	7.96721	1.82722	12.3808
6530402F18Rik	237.201	225.837	218.47	292.162	265.364	236.777	236.206	253.672	202.681	259.866	330.168	367.035	290.455	247.874	289.98	293.869	440.947	231.236	252.858	275.85	328.893	251.117	369.585	290.153
6530403H02Rik	0	0	0	0	0	0	0	0	0	0	0	0	0	0	0	0	0	0	0	0	0	0	0	0
6530411M01Rik	0	0	0	0	0	0	0	0	0	0	0	0	1.58784	0	0	0	0	0	0	0	0	0.8985	0	4.43582
6720468P15Rik	1.04151	0	0	0	0	1.26588	0	0	0	1.90489	0	0	0	0	1.97922	0	4.33704	0	0	0	0	0	0	0
6720483E21Rik	0	0	0.97786	0	0	0	4.29479	1.49142	0	3.8219	3.68448	0	0	1.15617	0	0.97963	0	0	0.951229	0	0	0	0	0
6720489N17Rik	16.1504	18.0583	9.75963	31.1354	24.2254	12.4847	19.4931	16.48	35.5653	25.031	22.4148	12.802	28.0052	16.3156	19.7731	23.1099	25.7526	23.4979	19.9403	5.77661	14.3939	30.2451	17.8866	28.4603
6820408C15Rik	66.3042	84.3877	79.7633	50.6308	109.173	89.1902	102.864	97.7911	137.881	108.866	78.0647	87.9616	37.8587	106.947	103.864	74.5986	41.0852	80.4777	59.7663	53.6369	87.8472	57.856	83.742	67.3822
6820426E19Rik	0	0	0	0	0	0	0	0	0	0	0	0	0	0	0	0	0	0	0	0	0	0	0	0
6820431F20Rik	1261.07	1183.79	1269.07	1387.55	1324.16	1261.98	1509.95	1148.43	1667.31	1628.49	1664.01	1495.08	1602.11	1354.38	1117.44	1431.79	1289.28	1367.28	1214.95	1219.37	1524.17	1402.92	1337.8	1409.15
7420426K07Rik	0	0	0	0	0	0	0	0	0	0	0	0	0	0	0	0	0	0	0	0	0	0	0	0
7420700N18Rik	0	0	0	0	0	0	0	0	0	0	0	0	0	0	0	0	0	0	0	0	0	0	0	0
7420701I03Rik	0	0	0	0	0	0	0	0	0	0	0	0	0	0	0	0	0	0	0	0	0	0	0	0
7530416G11Rik	0	0	0	0	0	0	0	0	0	0	0	0	0	0	0	0	0	0	0	0	0	0	0	0
7630403G23Rik	0	0	0	0	0	0	0	0	0	0	0	0	0	0	0	0	0	0	0	0	0	0	0	0
8030411F24Rik	0	0	0	0	0	0	0	0	0	0	0	0	0	0	0	0	0	0	0	0	0	0	0	0
8030423F21Rik	0	1.92086	0	3.74811	0	0	0	0	0	0	0	0	0	4.62284	2.96477	0	0	0	0	0	1.92056	0	0	0
8030423J24Rik	0	0	0	0	0	0	0	0	0	0	0	0	0	0	0	0	0	0	0	0	0	0	0	0
8030442B05Rik	0	0	0	0	0	0	0	0	0	0	0	0	0	0	0	0	0	0	0	0.807594	0	0	0	0
8030443G20Rik	0	0	0	0	0	0	0	0	0	0	0	0	0	0	0	0	0	0	0	0	0	0	3.65413	0
8030451O07Rik	0	0.964641	0	0	0	0	0	0	0	0	0	0	0	0	0	0	0	0	0	0	0	0	0	0
8030455M16Rik	0	0	0	0	0	0	0	0	0	0	0	0	0	0	0	0	0	0	0	0	0	0	0	0
8030462N17Rik	702.448	613.117	572.023	593.691	669.454	644.607	611.834	558.33	730.349	724.782	751.59	743.111	721.18	642.746	671.805	614.131	560.244	603.091	583.402	690.739	713.67	758.509	758.252	666.679
8030474K03Rik	1.03328	0	2.86993	1.90104	0	0	0	1.49027	0	3.14163	6.10803	0	3.17324	4.63708	3.93051	7.65358	0	0	4.76625	0	1.91331	0	0	7.09146
8430422H06Rik	0	0	0	0	0	0	0	0	0	0	0	0	0	0	0	0	0	0	0	0	0	0	0	0
8430423G03Rik	0	0.964641	0	0	1.06975	0	0	0.761336	0	0	0	0	0	0	0	2.89504	0	0	0	1.61519	0	4.4165	1.84515	3.55971
8430426J06Rik	1.04538	0	0	2.77512	1.06097	0	0	6.15342	0	0.48009	1.34717	3.88731	0	7.26982	6.52797	0.757126	0	0	0	0	0	1.93487	2.92351	0.999489
8430429K09Rik	26.2877	22.7716	27.8083	42.2527	30.0033	32.0593	27.9779	51.2919	26.8973	33.6377	54.5225	40.3323	40.4588	45.2307	48.5101	34.6705	18.145	36.0964	37.6017	23.0611	39.1828	46.7222	27.6668	66.072
8430430B14Rik	0	0	0	0	0	0	0	0	0	0	0	0	0	0	0	0	0	0	0	0	0	0	0	0
8430431K14Rik	0	2.72909	3.06515	0	0	0	0	0	1.44571	0	0	0	0	0	0	0	0	0	1.95781	0	0	0	4.56766	0
8430436N08Rik	0	0	0	0	0	0	0	0	0	0	0	0	0	0	0	0	0	0	0	0	0.961989	0	0	0
8430437L04Rik	6.21486	2.86909	2.95469	2.80376	10.6697	0	6.02352	2.25257	4.09347	6.37919	1.25344	1.2255	0	1.16399	0	0.993529	0	1.92179	0	0.811714	2.8998	3.54803	2.73198	16.7749
9030025P20Rik	22.7725	40.2509	66.9618	47.6177	59.7884	48.2916	42.1207	23.244	58.8025	31.3526	28.8131	68.6349	79.7243	56.8907	98.2414	24.7989	88.7988	49.992	39.9088	34.0881	20.2805	61.2903	31.8015	66.0217
9030204H09Rik	0	0	0	0	0	0	0	0	0	0	0	0	0	0	0	1.93003	0	0	0	0	0	0	0	0
9030404E10Rik	0	0	0	0	0	0	0.863061	0	0	0	0	0	0	0	0	0	0	0.97314	0	0	0	0	0	0
9030612E09Rik	64.934	58.6259	69.4743	53.9633	86.1192	50.7194	77.2407	59.0387	69.1623	97.658	76.6496	61.3833	34.7952	64.8524	67.5062	43.5144	24.0252	44.6746	20.0647	39.753	56.7282	38.6338	30.138	38.0568
9030616G12Rik	0	0	0	0	0	0	0	0	0	0	0	0	0	0	0	0	0	0	0	0	0	0	0	0
9030619P08Rik	2.06455	0	0.972795	5.69292	6.36834	0	3.43577	0	0	10.107	2.44279	3.64398	0	0	0	4.87535	0	0	0	0	2.88541	0.887873	1.8319	0
9030624G23Rik	15.5031	16.3263	10.6843	19.6756	8.51788	10.1212	7.78917	17.214	10.7801	13.2608	17.3126	4.84678	20.5017	12.696	7.95117	7.75383	4.33159	19.395	13.3563	18.6778	5.75363	11.6624	5.49581	15.885
9030625G05Rik	0	2.8362	0	2.84374	0	0	0	0	0	0	0	0	0	0	0	0	0	0	0	0	0	0	0	0
9130008F23Rik	33.0942	5.73183	17.8423	12.915	10.6459	19.2006	18.1414	23.2321	23.351	17.8976	16.4112	6.10796	14.3831	16.2436	18.2462	18.9535	13.0648	24.9331	14.3811	17.0374	27.0464	11.4386	20.8346	24.7399
9130015A21Rik	0	0	0	0	0	0	0.863061	0	0	0	0	0	0	0	0	0	0	0	0	0	0	1.81129	0	0
9130015G15Rik	5.17308	1.91101	5.9885	0.919771	12.7712	6.40822	0.860449	5.27334	2.75714	7.72523	6.36554	2.46485	4.78465	5.81498	10.1898	4.03557	30.1536	10.5549	0.955131	8.93899	3.8766	16.742	7.25979	18.5017
9130015L21Rik	0	0	0	0	0	0	0	0	0	0	0	0	0	0	0	0	0	0	0	0	0	0	0	0
9130019O22Rik	52.5876	48.1194	68.4527	47.0694	85.5401	67.9995	70.6394	69.5865	101.654	97.2245	113.406	68.9498	79.1981	78.7776	92.5433	77.2083	58.6728	59.3765	59.6652	94.7756	101.652	98.6185	70.5536	57.3147
9130019P16Rik	1.03462	1.92062	1.94928	0	0	1.26736	5.17437	0.748153	4.07451	0.634839	2.49176	0	3.17679	8.12208	0	0.977713	8.68418	6.77585	0.955269	5.68107	0	4.47848	2.74785	0
9130023H24Rik	62.146	149.245	115.129	124.435	150.309	132.41	156.709	104.185	99.439	145.401	106.753	87.5964	140.507	204.009	146.664	113.051	69.8893	81.8492	110.469	106.827	111.189	157.172	116.291	133.542
9130024F11Rik	5.91877	0.5678	1.14134	0	1.20941	0	1.01878	2.3823	1.62502	0	0	0	3.23411	2.41526	2.12947	0	4.36639	0	0	0	0	0	0	0
9130204L05Rik	0	0	0	1.86545	0	0	0	0	0	0	0	0	0	0	0	0	0	0	0	0	0	0	0	0
9130209A04Rik	0	0	0	0	0	0	0	0	0	0	0	0	0	0	0	0	0	0	0	0	0	0	0	0
9130221F21Rik	0	0	0	0	0	0	0	0	0	0	0	0	0	0	0	0	0	0	0	0	0	0	0	0
9130221H12Rik	205.585	170.843	151.656	139.576	116.382	175.978	159.968	179.167	191.525	196.029	244.319	163.45	173.948	211.091	184.131	200.084	131.093	174.804	143.746	185.339	203.046	167.949	146.448	147.79
9130227L01Rik	0	0	0	0	0	0	0	0	0	0	0	0	0	0	0	0	0	0	0	0	0	0	0	0
9130230L23Rik	0	0	0	0	0	0	0	0	0	0	0	0	0	0	0	0	0	0	0	0	0	0	0	0
9130401M01Rik	268.629	248.411	232.063	248.397	318.2	320.997	268.873	253.572	398.942	361.448	308.274	325.298	285.989	369.006	361.316	350.014	353.323	303.926	342.505	305.126	342.57	346.45	360.617	357.598
9130409I23Rik	0	0	0	0	0	0	0	0	0	0	0	0	0	0	0	0	0	0	0	0	0	0	0	0
9230009I02Rik	0	0	0	0	0	0	0	0	0	0	0	0	0	0	0	0	0	0	0	0	0	0	0	0
9230019H11Rik	0	0	0	0	0	0	0	0	0	0	0	0	0	0	0	0	0	0	0	0	0	0	0	0
9230020A06Rik	0	0	0	0	0	0	0	0	0	0	0	0	0	0	0	0	0	0	0	0	0	0	0	0
9230102K24Rik	0	0	0	0	0	0	0	0	0	0	0	0	0	0	0	0	0	0	0	0	0	0	0	0
9230102O04Rik	0	0	0	0	0	0	0	0	0	0	0	0	0	0	0	0	0	0	0	0	0	0	0	0
9230104L09Rik	0	0	0	0	1.06562	0	0.865036	0	0	4.45696	2.44973	0	0	0	1.00188	0	6.50844	0	0	0	0	0	1.80662	0
9230105E05Rik	0	0	0	0	0	0	0	0	0	0	0	0	0	0	0	0	0	0	0	0	0	0	0	0
9230110F15Rik	0	0	0	0	0	0	0	0	0	0	0	0	0	0	0	0	0	0	0	0	0	0	0	0
9230112D13Rik	0	0	0	0	0	0	0	0	0	0	0	0	0	0	0	7.12904	0	0	0	0	0	0	0	0
9230112J17Rik	275.174	318.213	186.595	232.124	296.196	298.885	283.361	253.761	360.409	274.442	309.629	252.732	324.335	273.924	299.151	237.235	187.954	295.829	241.086	245.682	257.574	348.038	254.555	292.302
9230114K14Rik	53.7382	48.2868	60.6104	54.1473	38.9183	50.6764	48.0785	35.9355	74.5786	54.6821	61.7974	43.4725	82.257	52.5141	30.3992	58.6747	48.8153	63.5437	64.9599	44.076	47.9763	64.3242	59.409	60.3395
9230116L04Rik	0	0	0.962332	1.86619	0	2.52861	0	0	2.69454	0.625547	1.23746	3.61717	15.7883	3.46625	0	0	0	0	2.87791	0.810135	0	0.893271	1.83934	0.888741
9230116N13Rik	18.6252	18.1478	13.8498	7.39321	11.7042	12.7815	14.6397	19.5928	10.8974	21.6641	12.67	24.4541	23.8359	10.4128	17.2457	24.8042	21.5897	5.79983	9.60885	13.7924	6.77431	11.4652	8.22442	19.452
9230117E06Rik	0	0	0	0	0	0	0	0	0	0	0	0	0	0	0	0	0	0	0	0	0.961989	0	0	0
9330020H09Rik	16.5117	32.7644	19.3494	19.6861	14.9718	39.12	23.3415	22.365	24.4958	25.9907	38.1239	39.9092	22.2442	34.7904	20.7103	35.8462	10.9252	21.3103	17.9969	31.5918	26.8704	29.7654	24.6125	38.7514
9330102E08Rik	92.2135	96.326	104.802	105.167	82.6436	86.7929	92.846	87.9532	124.702	149.55	141.806	181.108	135.435	129.783	117.716	134.818	135.171	154.426	160.487	130.457	129.521	166.746	173.994	176.706
9330104G04Rik	8.26269	5.76608	24.1507	18.0196	27.8217	5.02726	18.0728	8.22669	8.09748	11.9951	11.0403	10.9143	50.6699	19.6665	8.83573	12.5471	17.3458	15.5352	5.6772	11.3535	6.7031	20.766	15.5794	9.69609
9330111N05Rik	0	0	0	0	0	2.53136	0	1.48852	0	1.91499	1.2396	2.44694	1.59067	1.15602	3.98744	1.97896	0	0	0.944111	1.61717	0	0	0	0
9330117O12Rik	0	0	0.963521	0	0	0	0	0	2.78756	0	0	0	0	0	2.05157	0	0	0	0	0	0	0	0.901554	1.75678
9330133O14Rik	62.0161	79.7791	59.201	60.1162	36.3317	51.828	66.3277	51.5429	66.6188	98.2665	91.4146	47.3124	95.4639	121.722	109.817	146.91	21.7962	52.1875	49.3949	85.0501	72.0993	50.2357	71.9641	74.9915
9330136K24Rik	3.04976	6.4848	5.28345	8.36298	17.4147	8.1302	2.56917	7.99896	33.3481	10.5811	0	7.74244	18.7101	9.37593	8.10185	2.221	14.4181	4.95236	11.2857	8.34926	13.1448	2.50736	14.8386	11.7337
9330151L19Rik	115.217	187.566	101.175	105.624	96.47	123.457	148.645	142.093	165.693	174.108	186.429	157.774	150.77	122.895	146.856	182.45	134.504	111.902	135.295	103.653	157.012	130.234	91.0168	132.232
9330158H04Rik	81.0351	117.391	141.06	80.1059	141.651	136.5	120.145	149.538	173.701	160.311	226.84	167.932	159.155	129.623	164.301	179.63	91.4978	145.69	138.044	112.291	103.93	131.811	71.9014	145.306
9330159F19Rik	33.8191	18.7641	14.4852	20.7186	1.03708	1.32704	11.1679	8.62737	7.00956	3.23849	8.32859	1.25299	9.38359	8.19517	3.30302	3.20798	6.21002	16.5395	6.92535	4.10747	5.97439	9.42558	2.77301	6.26812
9330159M07Rik	59.1705	76.5148	59.3651	79.5486	68.1598	66.99	77.4056	80.0022	73.4792	89.1365	76.945	70.5447	78.8418	67.7992	56.298	70.6502	100.448	79.2179	61.1281	62.6094	83.7696	62.0113	106.613	83.0196
9330162012Rik	31.0962	22.0375	29.4247	20.6608	26.6644	20.2872	15.5354	28.3839	27.0751	25.4118	8.68361	26.828	23.834	31.2052	16.9545	20.5875	2.1703	19.2339	20.0115	19.4748	24.9451	25.7719	16.376	30.8342
9330162B11Rik	0	0	0	0	0	0	0	0	0	0	0	0	0	0	0	0	0	0	0	0.807594	0	0	0	0
9330175E14Rik	9.29805	4.80071	10.6101	10.3316	17.0602	2.52742	6.0549	5.97763	5.39906	7.56937	28.1756	19.2548	7.92927	10.4121	15.7779	8.68158	8.7482	6.78954	12.4111	17.8589	8.65695	6.2983	7.29831	4.42976
9330175M20Rik	0	0.973017	0	0.924698	2.16014	0	3.51007	0	0	0	0	0	0	2.3784	0	0	0	0	0	0	3.99659	2.62844	0	0
9330178D15Rik	0	0	0	0	0	0	0	0	0	0	0	0	0	0	0	0	0	0	0	0	0	0	0	0
9330179D12Rik	8.88318	6.62342	11.2998	7.06603	7.29135	16.0675	19.9722	14.2503	14.428	17.9098	8.55395	20.739	15.0042	14.1521	20.6119	25.219	2.41645	10.834	10.8835	10.0625	11.8741	9.19758	6.38131	8.47511
9330182L06Rik	0	0	0	0	1.42577	8.35563	0	2.5336	0	8.72573	3.99064	10.2877	6.15575	9.03512	3.27551	0.549069	9.9896	4.73787	8.5892	2.25795	0.967779	3.81014	3.64038	0
9330182O14Rik	0	0	0	0	0	0	0	0	0	0	0	0	0	0	0	0	0	0	0	0	0	0	0	0
9330188P03Rik	37.3304	33.3659	38.4291	27.2537	43.643	36.861	33.5969	45.0856	20.2631	43.3647	29.8901	41.6014	42.8123	24.2861	25.065	26.723	21.5912	17.2949	25.7891	36.7062	30.877	38.9851	62.8782	43.2783
9330198I05Rik	5.18183	10.5033	8.93384	7.40271	2.12994	0	6.88477	6.0433	2.74472	12.8665	1.27184	0	15.9768	0	0	3.02513	2.15431	7.68479	5.74068	1.6293	3.88556	5.30028	4.55389	0.883385
9330199G10Rik	0	0	0	0	0	0	0	0	0	0	9.825	0	0	0	0	0	0	0	0	0	0	0	0	0
9430007A20Rik	0	0	0	0	0	0	0	0	0	0	0	0	0	0	0	0	0	0	0	0	0	0	0	0
9430014N10Rik	0	0	0	0	0	0	0	0	0	0	0	0	0	0	0	0	0	0	0	0	0	0	0	0
9430015G10Rik	70.2942	68.4919	80.9061	59.0923	71.0115	75.6537	95.8782	59.5236	121.589	105.797	139.69	105.093	57.6167	78.5391	67.6365	102.25	98.6519	107.824	84.6312	93.0888	74.5325	78.6998	48.7485	97.3412
9430018G01Rik	0	0	0	0	0	0	0	0	0	0	0	0	0	0	0	0	0	0	0	0	0	0	0	0
9430019J16Rik	0	0	0	0	0	0	0	0	0	0	0	0	0	0	0	0	0	0	0	0	0	0	0	0
9430021M05Rik	0	0	0	0	0	0	0	0	0	0	0	0	0	0	0	0	0	0	0	0	0	0	0	0
9430037G07Rik	73.4696	64.5706	63.2857	53.1489	44.5229	51.9913	72.0903	53.142	76.8177	77.9596	87.9812	44.8192	72.0418	80.4714	46.1037	58.1219	59.9327	66.8431	54.9989	71.517	55.6752	53.619	57.9639	43.2626
9430038I01Rik	86.3741	96.6137	94.3232	93.8146	107.73	72.7815	93.6878	95.1966	86.9418	138.831	118.791	93.2016	81.7736	103.201	99.0504	118.811	58.2265	84.8072	87.5879	92.8346	82.3046	108.184	95.3721	100.38
9430041J12Rik	0	0	0	0	2.13612	0	0	0	0	0	0	0	0	1.15566	0	0	0	0	0	0	0.958648	0	0	0
9430060I03Rik	1.02915	1.91415	2.85783	3.80294	2.13258	0	1.73288	0	1.33179	4.9884	10.9032	2.39377	1.57131	0	0	10.3595	0	0	1.91171	2.43742	0	3.61814	2.75946	4.43047
9430065F17Rik	15.5652	4.52715	1.28972	0	2.11428	2.808	0.445652	9.87988	7.40369	8.87801	1.34948	4.9041	0	6.23432	11.6831	0	2.47706	0	4.9659	2.79814	0.548261	13.0988	1.54224	1.99028
9430069I07Rik	0	0	0	0	0	0	0	0	0	0	0	0	0	0	0	0	0	0	0	0	0	0	0	0
9430078K24Rik	2.07484	0	1.94718	0	3.19704	0	0	0.752688	0	1.1638	1.27329	2.50601	0	0	2.76533	0.999375	2.17948	4.96258	5.79604	1.64779	8.16296	6.93091	5.4166	3.40954
9430083A17Rik	5.1724	17.2445	3.93739	12.9578	17.0427	8.93908	17.2207	13.4829	8.2442	10.8478	12.6027	14.6644	14.3739	15.1172	5.03962	16.8722	8.6972	11.5338	16.2309	14.5817	22.217	20.3555	8.15991	12.3509
9430091E24Rik	21.7796	22.7382	20.878	17.6238	20.2461	25.5729	15.535	25.6432	31.4507	21.0294	23.9577	33.154	22.3041	26.7149	17.2824	23.5743	23.7395	19.2305	6.70413	13.8757	23.2802	18.6265	16.4137	22.1184
9530002B09Rik	0	0	0	0.932727	0	0	0	0	0	0	0	0	0	0	0	0	0	0	0	0	0	0	0	0
9530003J23Rik	0	0	0	0	0	0	0	0	0	0	0	0	0	0	0	0	0	0	0	0	0	0	0	0
9530014B07Rik	0	0	0	0	0	0	0	0	0	0	0	0	6.36673	0	0	0	0	0	0	0	0	0	0	0
9530020I12Rik	9.7934	6.4845	7.77653	4.19099	8.12049	1.00373	12.8761	8.91163	5.86351	14.5668	2.21762	9.26942	5.76431	8.44416	8.65287	13.2344	2.96271	4.00423	0.809135	10.8375	12.3781	4.53669	6.2942	6.0075
9530026F06Rik	0	0	0	0	0	0	0	0	1.36416	0	0	0	0	0	0	0	0	0	0	1.64214	0	0	0	0
9530026P05Rik	13.2442	20.1749	27.9977	14.6572	25.4955	12.0635	27.4894	24.1415	47.7599	26.5096	18.6719	42.4064	27.6129	11.574	38.7218	11.7897	6.07214	10.8652	18.4289	20.7586	15.0127	10.8889	3.79125	13.7225
9530027J09Rik	0	0	0	0	0	1.2622	0	0	4.0409	0	0	1.21756	3.17894	0	2.96317	0	4.34953	0	0	0	0	2.67913	1.81963	0
9530036O11Rik	0	1.92928	0	0	0	0	0	0	0	0	0	0	0	0	0	0	0	0	0	0	0	0	0	0
9530051G07Rik	0	4.64189	2.02598	4.33332	7.2958	2.63003	0.85644	5.42454	1.40156	8.43189	4.10255	0	14.3177	4.73056	0	1.06546	6.30575	4.8619	0	7.39163	0	19.1744	3.72534	2.71018
9530052C20Rik	3.09555	2.82922	2.05637	1.76172	4.20712	0	0	2.32914	9.8948	2.63035	0	0	1.60862	2.39435	0	0	8.52983	0	0	7.4732	3.00542	1.75525	3.71724	4.51582
9530052E02Rik	1.0317	0	0	0	2.13616	1.2606	0	0	2.72832	0	0	0	0	0	0	2.89504	0	0	0	0.818348	0	0	0	0
9530053A07Rik	4.09535	0	0	0.939894	2.12945	0	0	0	0	0	0	0	0	1.16085	0	1.90956	0	0	0	1.61519	0	0	2.747	0
9530059O14Rik	0	0	0	0	0	0	0	0	0	0	0	0	0	0	0	0	0	0	0	0	0	0	0	0
9530062K07Rik	0	4.71991	2.01686	7.5321	1.06165	2.56131	6.87759	8.27619	4.04073	10.2057	3.77381	2.46729	0	8.07719	2.03411	5.02401	10.7963	12.368	15.4379	6.53375	4.81557	9.50636	4.54675	4.42602
9530068E07Rik	3011.86	2933.66	2840.92	3023.8	3171.58	3063.58	3192	3107.44	3583.99	3822.7	3495.32	3727.29	3378.45	3671.95	3743.67	3683.15	3264.83	2988.08	3162.41	3138.13	3143.55	3296.94	3327.08	3196.63
9530077C05Rik	2.15025	11.8876	1.15476	14.5419	6.36716	10.8869	9.77689	16.3524	15.8726	7.93093	12.0868	14.3059	12.5773	18.6046	11.0896	17.3699	2.8354	5.9758	28.2613	7.43994	7.32236	4.52477	11.7994	9.6778
9530080O11Rik	3.80228	2.92527	3.30427	5.68134	2.93397	5.79766	4.959	2.23476	3.80499	4.7733	1.28969	0	15.7366	0	1.15153	3.2997	2.11657	4.0937	5.26973	1.72857	8.22384	3.20005	7.06107	3.3819
9530082P21Rik	106.269	131.848	213.094	113.786	202.24	161.9	173.148	126.275	123.997	163.515	287.176	164.051	158.294	180.385	125.154	150.369	128.362	106.177	101.318	168.502	160.717	167.745	137.605	174.765
9530091C08Rik	7.28201	4.82483	0	0	3.21383	0	4.30622	5.26025	1.38279	1.29096	5.05383	12.319	41.6421	3.49776	1.00976	4.01246	0	4.78222	8.5323	3.23923	0	13.2988	0.903778	0
9630001P10Rik	0	0	1.92704	0	0	0	0	0	1.39521	0	0	0	0	0	1.05793	0	0	5.9397	0	0	0	0	0	0
9630013A20Rik	0	0	0	0	0	0	0	0	0	0	0	0	0	0	0	0	0	0	0	0	0	0	0	0
9630013K17Rik	0	0	0	4.66364	0	0	2.56558	0	4.06063	1.27721	0	0	0	0	0	0	0	0	0	0	0	0	0	0
9630028B13Rik	0	0	0	0	0	0	0	0	0	0	0	0	0	0	0	0	0	0	1.89495	0	0	0	0	0
9630028H03Rik	0	0	0	0	0	0	0.863061	0	1.35671	0	0	2.42979	0	0	0	0	0	0	0	0	0	0	1.82375	1.77031
9630028I04Rik	157.157	257.184	189.448	192.547	257.93	285.997	224.084	284.708	282.052	220.883	207.119	178.073	201.932	276.92	285.952	209.292	72.0123	144.964	156.032	148.359	169.004	107.346	27.2997	148.775
9830107B12Rik	0	0	0	0	0	1.26263	0	0.746057	0	0	2.47335	0	0	0	0	0	0	1.93985	0	0	0	0	7.30825	0
9830132P13Rik	0	0	0	0	0	0	0	0	0	0	0	0	0	0	0	0	0	0	0	0	0	0	0	0
9830166K06Rik	0	0	0	0	0	0	0	0	0	0	0	0	0	0	0	0	0	0	0	0	0	0	0	0
9930012K11Rik	14.4526	15.3751	12.5171	9.51309	16.0689	18.8083	12.078	20.9044	18.8075	17.6077	13.3795	26.5319	18.9624	15.0045	14.6599	11.4627	8.72047	15.5667	18.9599	22.7046	12.4007	12.6846	18.3784	24.7353
9930014A18Rik	29.9706	53.1036	77.9191	87.5708	73.8255	80.6185	64.8634	82.4861	44.7592	62.0273	53.7513	45.8382	92.1494	69.5056	64.7673	53.92	56.9601	52.226	35.9844	71.2845	101.61	38.8585	65.5425	85.4236
9930021J03Rik	702.093	553.53	699.493	613.691	673.774	604.895	694.501	527.613	770.17	784.549	764.404	752.585	856.381	540.214	525.824	561.509	645.04	661.608	657.619	592.937	832.085	727.812	695.313	815.157
9930104L06Rik	176.706	152.887	125.594	140.461	212.906	225.165	142.389	170.541	200.37	216.106	241.001	209.203	227.665	221.936	203.924	220.654	218.219	222.525	194.193	149.107	234.501	228.221	192.841	194.383
9930111H07Rik	0	0	0	0	0	0	0	0	0	0	0	0	0	0	0	0	0	0	0	0	0	0	0	0
9930111J21Rik1	276.757	159.407	202.646	184.397	201.332	197.927	207.739	198.555	271.479	290.946	287.985	227.895	361.506	219.701	79.7201	147.097	245.938	324.391	261.349	249.122	222.224	283.743	245.814	383.892
9930111J21Rik2	16.6295	21.0483	40.891	15.8655	42.8646	26.7451	29.261	44.7444	45.3741	24.5125	49.9237	29.5459	0	53.4741	43.2147	44.0868	28.3178	13.326	38.8897	62.4241	41.432	54.6779	27.9667	47.3952
A030001D20Rik	69.4687	51.8054	36.9742	46.4543	59.9426	70.5859	47.4122	39.539	72.7977	70.4725	80.5668	70.3618	49.3267	85.5384	57.0746	46.593	69.8363	67.4528	59.8049	69.8612	60.438	43.0129	59.2273	51.1401
A130010J15Rik	99.545	130.954	142.48	167.45	161.354	176.398	198.561	156.04	171.289	185.981	214.974	165.033	151.168	200.133	198.903	183.624	111.389	141.185	125.492	122.23	190.403	166.048	143.726	149.01
A130030D18Rik	0	0	0	0	0	0	0	0	0	0	0	0	0	0	0	0	0	0	0	0	0	0	0	0
A130077B15Rik	0	1.91356	3.0015	2.78354	1.06682	8.95897	0.857142	1.49671	8.28736	0.643858	3.80617	1.23675	6.46023	4.68967	4.07671	0	2.17018	3.80955	8.57038	5.66473	0	4.4082	3.63525	6.19195
A1bg	0	0	0	0	0	0	0	0	0	0	0	0	0	0	0	0	0	0	0	0	0	0	0	0
A1cf	2.04764	0	0	0	0	0	0	2.28005	0	0	0	0	0	0	0	0	0	0	0	0	0	0	0	0
A230001M10Rik	2.0646	5.72244	9.82056	10.2575	2.13368	8.89395	5.15958	6.76258	2.71971	11.4928	15.0082	1.22372	6.35228	4.63472	14.0385	4.94721	6.47873	3.85602	1.90477	4.87966	6.74981	7.11926	7.29437	13.2257
A230009B12Rik	1.14797	1.04764	1.10968	1.02679	1.05869	7.71476	0.858945	6.0547	0	4.9957	3.02733	2.91467	0	0	6.52275	0	0	0	2.66704	1.72171	3.40214	0.56586	4.28255	3.11409
A230020J21Rik	0	0	0	0	0	0	0	0	0	0	0	0	0	0	0	0	0	0	0	0	0.961989	0	0	0
A230028O05Rik	0	0	0	0	0	0	5.16759	5.23509	0	0	0	1.23421	0	2.32351	3.00722	0.998715	0	9.55469	3.80432	8.9287	2.89762	2.65019	1.80503	3.5136
A230050P20Rik	97.3851	126.943	153.34	130.14	157.327	193.461	167.66	134.432	153.124	211.624	200.603	171.707	205.15	189.374	176.748	187.78	164.73	166.516	174.21	143.946	182.681	138.084	155.666	241.382
A230051N06Rik	0	0	0	0	0	0	0	0	0	0	0	0	0	0	0	0	0	0	0	0	0	0	0	0
A230056J06Rik	1.0332	3.81429	7.98993	1.81963	6.34441	6.4444	1.71717	4.56005	4.14042	7.71254	6.46848	3.70711	6.33875	3.49761	2.06356	4.06098	8.5369	0.96415	0.961352	3.25786	3.89806	4.39825	0.913343	8.84304
A230056P14Rik	24.7841	10.501	10.8413	11.2775	21.3862	11.3943	18.0701	15.7612	14.9469	34.277	24.9514	22.0109	14.275	15.0398	22.9468	6.88665	25.9041	16.4464	11.4029	21.0895	23.006	16.0212	11.8998	8.81736
A230057D06Rik	0	0	0	0	0	1.2688	0	0.742427	0	1.29144	0	1.24131	0	0	0	0	0	0.963421	0	0	0	0.905645	0	0
A230070E04Rik	0	0	0	0	6.33295	0	2.62002	0	0	0	6.19977	0	0	2.3102	0	1.93092	0	0.973438	0	0	0.970189	0	0	0
A230072C01Rik	21.3767	33.2079	50.786	27.858	56.58	64.2041	65.3358	60.1726	86.261	63.7142	69.5591	78.1699	52.1373	35.2538	59.8866	70.1506	47.508	54.2934	35.7848	48.6811	45.7865	52.4452	62.1334	53.8351
A230072E10Rik	0	0	0.968174	0	0	0	4.22502	0.744216	1.3822	0	5.15163	1.23373	15.9617	0	0	3.07317	0	4.75837	4.78421	3.23914	0	3.49727	0.909785	6.20087
A230077H06Rik	0	0.964641	0	0	0	0	2.60444	0	0	0	0	0	0	0	0	0.965013	0	0	0	0	0	0	3.58094	0
A230083G16Rik	0	0	0	0	0	0	0	3.73157	0	0	3.68665	1.20651	0	0	0.988984	0	0	0	0	0	0.960472	3.58664	0	0
A230103J11Rik	5.17019	0	15.3058	2.86021	5.49316	0	2.67636	3.20245	4.09089	7.63338	3.70757	8.53159	1.61109	0	5.9781	4.8315	0	9.7843	0.954308	1.62434	4.77487	2.72648	5.52747	0
A230107N01Rik	12.3065	6.50004	3.19792	5.89178	4.06997	8.11838	5.17185	8.03848	0	11.0385	4.35869	7.60246	13.8194	2.34254	4.59414	9.93284	2.00249	9.75665	4.02609	6.60228	13.1265	2.53023	5.61144	10.8657
A230108P19Rik	0	0	0	0	0	0	0	0	0	0	0	0	0	0	0	0	0	0	0	0	0	0	0	0
A2m	1.03703	13.4925	6.78706	6.62683	1.07364	6.2936	7.73506	14.1417	35.2074	9.54677	0	15.7712	1.59626	1.15954	7.84352	4.84903	2.18382	0.961958	0.943053	13.7519	6.71929	2.70065	0	4.39196
A2ml1	1.03801	2.88587	0	2.83025	2.14707	0	0	0	2.71032	3.83413	0	14.5856	6.38285	2.31318	0	6.82481	4.35644	0	3.76226	2.42173	0.962732	4.48408	4.5306	2.63397
A330008L17Rik	0	0	0	0	0	0	0	0	0	0.633634	0	0	0	0	0	0	0	0	0	0	0	0	0	0
A330009N23Rik	29.2395	48.3187	34.3809	40.594	79.8108	60.5787	54.1527	43.8589	54.5442	47.8971	51.0365	63.9286	72.0889	52.6097	31.296	55.3059	47.279	48.8282	51.881	48.5009	53.7225	48.3034	54.5989	71.5592
A330015K06Rik	0	0	0	0	0	0	0	0	0	1.26727	0	0	0	0	0	1.93003	0	0	0	0	0	0	0	0
A330023F24Rik	348.155	328.582	227.053	184.757	234.359	235.341	329.348	286	464.034	440.098	412.587	358.361	383.143	327.267	271.924	251.917	356.227	279.185	275.637	205.39	230.923	281.024	239.653	256.274
A330032B11Rik	2.08499	0.957839	0	0	5.27368	0	1.72801	6.93392	10.9656	2.56465	1.30601	1.23639	1.56941	0	1.04358	4.08851	2.12132	2.91248	0	0.821651	0	0	2.73242	0
A330033J07Rik	1.0317	0	0	0	2.13152	0	0	0	1.36416	0	0	0	0	0	0.984301	0	2.17823	0	0.95822	0	0	0	0	1.75819
A330035P11Rik	9.30249	7.63094	7.94748	4.60023	8.49819	6.41776	12.0208	2.26169	11.0273	12.1395	5.12882	9.8416	4.78406	10.4727	6.12495	10.0394	15.0955	11.537	13.4189	24.3114	11.6198	13.1707	13.6548	15.902
A330040F15Rik	0	0	0	0	1.06806	0	0	0	0	0	0	0	0	0	0	0	0	0	0	0	0	0	0	0
A330041J22Rik	11.2581	18.6364	7.20935	7.61327	9.14125	8.00746	14.7891	13.5503	9.55426	9.59078	11.0568	14.9186	6.03638	2.33965	5.5349	7.37435	0	5.90561	5.97756	6.58347	10.9746	8.71099	18.8988	12.6796
A330048O09Rik	0	1.87168	5.20045	4.5786	1.04992	0	0.875934	0	0	5.72939	0	6.23003	0	1.13056	2.13726	1.02708	0	0	0	0	0	0	0	0
A330049N07Rik	1.02174	0	0	0	0	0	0	0	0	0	0	0	0	0	0	0	0	0	0	0	0	0	0	0
A330069E16Rik	20.5032	14.0694	16.207	10.6925	16.6468	22.2167	27.6345	11.6638	12.306	14.6648	14.7272	18.5459	20.2428	11.6012	20.3228	10.3577	27.1693	12.6809	15.78	15.6451	14.7857	25.1101	15.7453	7.18179
A330070K13Rik	0	0	0	0	0	0	0	0	0	0	0	0	0	0	0	0	0	0	0	0	0	0	0	0
A330074K22Rik	0	13.4652	7.60763	13.2588	6.40218	7.53317	8.65976	12.6707	24.1229	31.8452	24.2602	13.1243	22.1206	16.1393	18.5255	11.3755	30.7042	26.3439	13.3303	6.48794	17.1984	9.99235	27.4784	11.522
A330076C08Rik	0	0	0	0	0	0	0	0	0	0	0	0	0	0	0	0	4.3552	0	0	0	1.92398	0	0	0
A330076H08Rik	0	0	0	5.59636	0	0	3.87972	0	0	0	0	0	1.56989	0	0	0	0	0	0	0	4.63074	0	0	0
A330093E20Rik	0	0.964641	0	0	0	0	0	0	1.36416	0	0	0	0	0	5.9058	0	0	0	0	0	0	0	0	0
A330094K24Rik	29.9828	42.0198	67.9851	51.3467	53.3431	39.0481	37.033	61.53	24.1151	69.847	63.9701	48.5755	86.7979	66.9001	55.2907	73.5777	25.9042	57.2323	76.1596	74.0401	44.9795	30.464	45.9592	39.7937
A330102I10Rik	13.8418	12.235	17.9176	4.30078	14.457	18.6201	6.69142	20.3085	13.9311	17.7187	2.53016	19.7857	1.73351	7.57583	18.9083	10.6448	20.0768	7.53996	6.30592	4.4452	9.71922	3.754	9.42623	7.12917
A3galt2	5.15143	11.5467	7.66244	5.6718	3.20687	1.25638	7.76771	3.73244	2.69793	7.54649	6.11776	7.22615	0	1.15507	10.7714	8.61831	2.17736	9.73503	10.424	11.3501	9.56536	7.25404	3.66342	11.4746
A430005L14Rik	225.232	254.538	245.077	249.905	286.49	241.335	214.288	292.837	386.199	284.229	393.312	327.968	256.209	310.33	337.243	257.007	229.422	221.891	263.949	232.007	260.367	257.954	258.261	250.644
A430033K04Rik	89.1088	166.875	162.654	108.322	137.921	129.649	165.059	145.121	193.179	198.601	207.622	207.142	146.992	191.634	167.295	146.808	138.985	144.835	110.159	117.554	156.167	120.7	140.56	120.494
A430035B10Rik	9.12958	10.1114	8.48992	12.3571	15.1121	8.17529	9.49981	8.15385	4.18972	12.269	16.2627	15.1622	9.10456	8.20625	7.03506	30.041	15.8899	7.9254	5.12659	11.6905	8.12344	8.42975	4.7259	10.0315
A430046D13Rik	321.742	399.87	370.98	281.713	313.666	404.6	382.034	466.369	473.37	426.305	411.424	404.281	450.273	487.656	423.161	363.254	234.132	375.315	375.791	313.634	327.784	353.593	307.824	304.515
A430057M04Rik	2.0586	0.963884	0.951908	0.945456	2.13687	0	15.6211	4.45174	0	1.86429	0	2.37791	0	0	0.972228	2.82979	13.158	1.94841	1.89763	1.61437	0	3.63531	4.58786	5.30877
A430078G23Rik	0	7.68337	2.91901	9.40934	4.27752	5.04918	0.859868	20.9531	0	1.26702	8.64587	2.42747	4.76781	5.7938	4.94418	0.972283	10.8565	0	1.89602	7.27886	1.92077	4.49039	0	0
A430078I02Rik	10.5091	11.7363	14.8901	7.58407	8.52701	15.2343	17.2873	8.97857	18.7715	15.1348	6.86369	13.8806	8.11611	13.046	12.0185	4.0034	6.72304	9.97896	16.7235	15.0409	6.83013	9.03762	7.38799	19.6644
A430085M09Rik	0	0	0	0	0	0	0	0	0	0	0	0	0	0	0	0	0	0	0	0	0	0	0	0
A430088P11Rik	0	0	0	0	0	0	0	0	0	0	0	0	0	1.15246	0	0	0	0	1.89495	0	0	0	0	0
A430089I19Rik	0	2.89392	0	0	0	0	0	0	0	3.16817	0	0	0	0	0	0	0	0	0	0	0	0	0	0
A430090L17Rik	0	0	0	0	0	0	0	0	0	0	0	0	0	0	0	0	0	0.97314	0	0	0	0	0	0
A430093F15Rik	3.10104	1.92051	1.94109	5.66829	5.35567	5.03874	9.46823	0.746691	4.0603	1.90467	0	1.21434	9.54774	5.79476	3.94145	0	0	0.9651	6.6171	2.43088	1.92269	2.7017	3.65255	0.88158
A4galt	121.875	140.686	120.127	148.172	129.779	127.269	92.3627	106.048	110.253	186.425	187.938	164.456	154.326	209.751	145.74	170.109	155.014	107.08	165.525	162.207	156.701	138.777	158.744	155.612
A4gnt	0	0	0	0	0	0	0	0	0	0	0	0	0	0	0	0	2.1776	0	0	0	0	0	0	0
A530006G24Rik	0	0	0	0	0	0	0	0	0	0	0	0	0	0	0	0	0	0	0	0	0	0	0	0
A530010L16Rik	0	0	0	0.93516	5.2729	0	1.71754	1.49659	0	0	0	0	4.72344	0	0	0.96268	0	0	0	0	0.956378	0.898704	0	3.58383
A530013C23Rik	49.2556	43.9324	24.318	30.105	11.9623	27.4904	31.7571	35.8208	53.751	53.3618	43.7287	14.3997	23.6652	25.2809	50.3765	19.4393	20.0251	32.1072	40.3819	30.6134	46.1085	25.172	30.0154	22.8666
A530016L24Rik	806.173	883.641	885.914	675.559	900.22	900.483	847.605	955.92	1232.2	998.836	1132.05	934.669	953.783	1038.25	1074.37	965.835	448.178	590.884	893.407	605.954	718.909	793.984	587.056	702.688
A530021J07Rik	0	0	0	0	0	0	0	0	0	0	0	0	0	0	0	0	0	0	0	0	0	0	0	0
A530032D15Rik	3.09804	4.7499	2.94562	0.931438	8.51064	5.10084	0.857219	9.77928	2.7209	10.7855	22.6964	9.81042	1.58799	4.6382	8.03922	4.9427	2.15955	5.77358	5.73797	6.48825	4.82821	8.81939	3.65161	13.2563
A530046M15Rik	0	0	0	0	0	0	0	0.746314	0	0	0	1.26074	0	0	0	0	0	0	0	0	0	0	0	0.883552
A530050N04Rik	0	0	0	0.934734	0	0	0	1.49485	0	0	3.72039	1.21946	0	0	0	0	0	0	0	1.61681	4.8266	0	2.73114	0
A530053G22Rik	0	0	0	0	0	0	0	0	0	0	0	0	0	0	0	0	0	0	0	0	0	0	0	0
A530058N18Rik	0	0	0	0	0	0	0	0	0	0	0	0	0	0	0	0	0	0	0	0	0	0	0	0
A530064D06Rik	2.18625	0	3.68548	2.66953	0	0	3.33287	0	0	3.52482	24.6233	7.51552	2.96909	3.21749	3.07094	6.34218	15.0809	0.94164	8.39222	7.17939	10.3033	7.69453	10.7247	9.2788
A530065N20Rik	0	0	0	0	0	0	0	0	0	0	0	0	0	0	2.97533	2.94014	0	0	0	0	0	0	0	0
A530072M11Rik	8.29022	2.87959	3.89145	5.67734	6.41064	3.78607	8.61719	14.9367	1.35089	6.99318	4.91367	6.07938	1.58944	3.46878	3.9545	4.87569	0	13.4702	4.74361	9.75532	3.84087	8.06025	8.19187	6.166
A530088E08Rik	0	0	0.963521	0	0	0	0	0	0	0	0	0	0	0	0	0	0	0	0	0	0	0	0	1.7671
A630001G21Rik	20.6849	10.4782	27.9224	44.1102	14.8608	32.084	36.9024	36.3843	19.2076	37.186	40.9782	50.5195	34.9546	25.5964	34.7875	29.2205	51.518	40.5085	55.7235	40.6762	27.2449	19.3584	63.0237	51.3234
A630001O12Rik	0	0	0	0	0	0	0.861023	0.74808	0	3.18011	0	1.21909	3.19702	0	0	0	0	0	0	0	0	0	0	0
A630010A05Rik	0	0	0	0	0	0	0	0	0	0	0	0	0	0	0	0	0	0	0	0	0	0	0	0
A630012P03Rik	0	0	0.963521	0	0	0	0	0	0	0	0	0	0	0	0	0	0	0	0	0.807594	0	0	0	0
A630019I02Rik	30.9939	43.0667	17.6303	25.1557	38.3317	13.9799	25.7776	31.6403	87.0858	29.2203	37.6775	35.3936	31.6915	31.3267	18.0622	15.7471	34.5354	27.1357	12.4079	23.5468	27.9659	45.5194	12.8223	17.6735
A630023A22Rik	0	0	0	0	0	0	0	0	0	0	0	0	0	0	0	0	0	0	0	0	0	0	0	0
A630023P12Rik	3.09511	0	0	0	0	0	0	0	0	0	4.9467	0	0	0	0	0	0	0	0	0	0	0.905645	0	0
A630066F11Rik	27.9971	20.9183	14.9066	24.2964	27.6464	15.3249	17.307	16.4296	14.9487	27.2657	21.2878	23.257	27.0627	18.5017	17.1572	21.7905	23.9345	18.1403	19.2011	25.1699	12.4449	29.7258	19.1005	26.508
A630072M18Rik	195.372	236.963	255.394	208.761	179.82	191.97	268.553	261.815	278.266	266.565	238.086	281.372	232.692	297.791	255.74	222.253	123.773	200.148	197.701	189.901	234.627	181.16	233.195	205.209
A630073D07Rik	1.0317	0	0	0	0	0	0	0	0	0	0	0	0	0	0	0	0	0	0	0	0	0	0	0
A630075F10Rik	0	0	0	0	3.21239	0	0.860261	3.73415	0	0	0	0	0	0	0	0	0	0	0	0	0	0	0	0
A630076J17Rik	0	2.89392	0	0	0	0	0	2.33343	0	0	1.29963	0	0	0	3.10434	0.998027	0	0.950504	0	0	0	5.09333	0	2.66481
A630077J23Rik	8.32635	4.77619	0.976408	0	1.06819	6.31246	1.72879	3.76959	9.27046	5.02823	19.5659	4.84916	9.44528	6.89371	4.941	8.70404	4.31869	16.4657	6.69908	8.99254	7.66319	5.35985	0.920184	12.4128
A630089N07Rik	11.3209	14.0668	10.2891	8.8835	10.4738	25.0216	3.41566	9.25393	5.6049	12.2044	6.86798	10.0416	6.3656	15.1893	2.16336	5.28086	6.31958	28.7864	15.697	7.31518	11.8189	16.0747	15.5417	9.79635
A630095E13Rik	0	0	0	0	0	0	0	0	0	0	0	0	0	0	0	0	0	0	0	0	0	0	0	0
A630095N17Rik	0	0	0	0	0	0	0	0	0	0	0	0	0	0	0	0	0	0	0	0	0	0	0	0
A730004F24Rik	0	0	0	0	0	0	0	0	0	0	0	0	0	0	0	0	0	0	0	0	0	0	0	0
A730006G06Rik	0	0	0	0	0	0	0	0	0	0	0	0	0	0	0	0	0	0	0	0	0	0	0	0
A730008H23Rik	180.845	101.028	151.775	130.052	106.794	160.852	165.589	209.891	242.121	214.47	246.712	224.7	178.791	248.49	279.609	251.184	226.099	195.882	164.95	147.095	212.78	125.67	122.521	208.193
A730013G03Rik	0	0	0	0	0	0	0	0	0	1.85772	0	0	3.14096	0	0	0	0	0	1.91245	0	0	0	0	0
A730017C20Rik	1.0317	0	0	0	0	2.52831	0	2.23588	0	1.9178	0	1.21892	0	0	0	1.9642	0	0	0	2.41262	0.9538	0	0	0
A730017L22Rik	35.1423	56.5026	44.3476	45.4721	43.7202	31.88	40.375	55.4544	55.0661	59.2956	48.0304	63.7831	36.7094	62.8858	26.1347	47.6342	62.8566	67.355	30.4387	29.0972	54.0199	42.5256	62.7078	51.1017
A730018C14Rik	0	0	0	0	0	0	0	0	0	0	0	0	0	0	0	0	0	0	0	0	0	0	0	0
A730020E08Rik	0.989821	0	5.37849	3.10131	1.94381	6.93538	0.854062	4.22082	0	4.46868	1.59472	2.53034	2.94064	2.32289	7.52368	3.45278	13.1906	10.0111	8.46651	4.18162	5.24641	4.13735	12.7465	0
A730020M07Rik	43.9293	65.7322	38.1526	31.57	31.8168	37.4561	74.0179	56.8756	71.1698	74.9143	58.7184	51.7146	61.8268	58.6054	48.5289	76.853	55.9677	97.56	46.2141	51.7299	63.4711	29.0172	46.7785	46.08
A730035I17Rik	0	0	0	0	3.20419	0	0	0	1.3459	1.28446	0	0	0	0	0	4.82507	0	0	0	0	1.91312	0	0	0
A730036I17Rik	7.24701	3.84533	6.81605	5.62789	1.06896	5.06429	0.859719	4.48523	6.80831	6.36209	1.23889	4.86691	6.36796	0	12.8855	2.93173	15.2304	9.64347	27.5167	19.4502	10.5919	23.2713	10.9155	10.5682
A730043L09Rik	0	0	0	0	0	0	0.863061	0	0	0.633634	0	0	1.59168	0	0	0	0	0	0	0	0	0	0	0
A730046J19Rik	0	0	2.02596	5.03425	0	1.30815	5.07248	3.10141	5.66111	2.6343	0	0	0	1.17385	1.11112	0	0	1.97052	0	1.66712	0	6.86214	3.72092	7.20173
A730056A06Rik	28.3441	15.3722	31.127	18.5753	21.5346	16.7124	19.2407	27.8409	35.5244	61.5975	46.1169	48.8301	38.2292	49.8052	50.0196	29.7638	44.2527	30.8259	45.3975	37.3353	18.2594	42.4101	29.4153	22.6883
A730063M14Rik	19.7597	17.3101	20.1887	19.5085	30.2414	28.0926	29.464	11.5213	38.9523	14.1338	22.1314	18.2405	7.71008	30.2883	15.3816	18.6786	6.32881	33.721	13.0536	18.4343	11.4561	15.2547	31.9359	22.7186
A730081D07Rik	5.19998	2.88401	0.977128	0	2.14015	8.85151	2.57974	1.49907	8.10208	5.73968	2.45925	8.52866	11.1276	3.47619	7.91708	10.7481	2.17375	18.3078	3.80044	1.62655	5.78494	2.68789	0.911787	3.52653
A730082K24Rik	0	0	0	0	0	0	0	0	0	0	0	0	0	0	0	0	0	0	0	0	0	0	0	0
A730085K08Rik	0	0	0	0	0	0	0	0	0	0	0	0	0	0	0	0	0	0	0	0	0	0	0	0
A730090N16Rik	2.00115	0	0	0	0	0	0	0	1.35134	0.628918	2.6524	1.22296	0	5.89175	0	0	0	0	6.87087	0	1.96199	0	2.76988	0.892082
A730098A19Rik	0	0	0	0	0	0	0	0	0	0	0	0	0	0	0	0	0	0	0	0	0	0	0	0
A830009L08Rik	1.03778	0	0	0	0	0	0	0	1.35983	0	0	3.64042	0	0	0	1.95628	0	0	0	1.62326	0.95952	0	0	4.39456
A830010M20Rik	94.6709	100.552	119.888	123.754	130.916	95.0319	140.113	110.873	146.999	160.087	148.423	137.725	196.285	88.9259	105.324	149.364	132.696	129.168	115.57	120.117	181.822	135.697	147.213	154.786
A830011K09Rik	0	0	0	0	0	0	0	0	0	0	0	0	0	0	0	0	0	0	0	0	0	0	0	0
A830018L16Rik	0	2.89392	0	0	0	1.02004	0	2.40891	0	1.26727	0	0	0	0	1.9686	0	0	0	0	0	0	0	3.81903	0
A830019L24Rik	0	0	0	0	0	0	0	0	0	0	0	0	0	0	0	0	0	0	0	0	0	0	0	0
A830019P07Rik	5.05732	9.06074	1.07773	5.72906	6.02498	8.26412	9.42102	6.63195	1.39374	12.8482	1.53854	10.1503	6.09119	2.32869	3.63824	5.67548	7.87728	11.9094	7.33826	4.1802	6.16868	6.54074	15.26	7.37636
A830029E22Rik	0	0	0	0	0	0	0	0	0	0	0	0	0	0	0	0	0	0	0	0	0	0	0	0
A830035O19Rik	14.4126	12.4584	0	6.66853	18.1015	9.98286	7.85316	8.86843	19.7131	16.0207	10.7557	20.1461	0	10.2438	11.5915	11.1122	6.58113	6.85312	5.7449	16.1997	17.025	7.25603	9.24163	6.20888
A830036E02Rik	0	0	0	0	0	0	0	0	0	0	0	0	3.18337	0	0	0	0	0	0	0	0	0	0	0
A830052D11Rik	1.0346	2.88581	0	0	0	0	0	2.23824	0	1.22557	1.1941	0	1.56865	2.29241	2.9221	0.936314	0	2.93764	0	0.815478	3.82285	0	0	0
A830082K12Rik	15.4752	11.3771	5.9949	14.5849	24.2117	6.437	18.1038	16.0662	1.36112	10.2223	7.71884	18.4701	10.9663	10.4557	22.6939	14.1366	21.1885	17.4878	1.93365	10.6512	14.5974	20.301	12.9078	20.4441
A830082N09Rik	79.3834	40.7061	51.2189	50.5881	29.4774	43.2626	35.9171	24.5072	54.9839	48.6188	59.4713	40.0852	36.7178	43.3614	36.3123	45.2186	33.9227	44.0869	40.7671	44.6479	35.4069	51.4845	26.3594	27.4366
A930001A20Rik	0	0	0	0	0	0	0	0	0	0	0	0	0	0	0	0	0	0	0	0	0	0	0	0
A930001C03Rik	0	0	1.9288	0.943075	1.05736	1.26513	0.867883	4.46757	0	3.34682	11.7604	0	0	0	2.12829	11.3536	2.19205	6.7345	1.92722	0.813328	3.13124	4.69362	2.885	9.62653
A930002C04Rik	46.6542	22.097	22.6191	44.2705	27.9071	37.9096	37.8953	49.1574	70.9034	57.6277	50.5059	48.8768	67.1088	57.9228	28.7118	32.4435	23.9659	49.88	37.7999	39.7146	66.1588	58.0661	43.5303	36.87
A930003A15Rik	6.28302	0	0	3.67581	0	0	0	0.703305	1.40782	1.9699	0	1.10936	0	1.13119	2.04751	0.993223	0	0	1.01627	0	1.0124	0	2.49058	4.0017
A930003O13Rik	0	0	0	0	0	1.2622	0	0	0	0	0	0	0	0	0	0	0	0	0	0	0	0	0	0
A930004D18Rik	121.064	116.043	140.053	132.004	118.844	140.624	150.468	138.746	110.708	144.224	122.238	118.264	160.91	163.8	191.302	157.084	122.319	131.407	113.826	88.5123	120.028	137.883	116.81	118.064
A930005H10Rik	115.298	98.0197	103.178	161.273	93.4491	93.1833	140.155	143.79	119.934	143.274	95.5664	147.317	113.079	116.81	137.784	121.561	125.348	115.44	108.428	131.122	129.957	95.1742	110.912	130.211
A930006I01Rik	0	0	0	0.932727	0	0	0	0	0	0	0	0	1.59168	0	0	0	0	0	0	0	0	0	0	0
A930006K02Rik	5.18528	8.54396	1.94926	3.82109	6.40017	5.0395	4.34798	5.23013	2.63735	6.8966	3.61068	2.40103	4.73412	12.5979	12.7885	3.83411	8.77591	7.72962	3.8518	2.45274	2.86607	2.67122	4.5929	5.33726
A930007A09Rik	13.4021	20.9948	15.7608	10.9922	34.8707	20.536	15.4886	25.7775	15.0812	22.23	35.9534	37.9964	53.725	22.1169	15.3443	14.9678	12.8545	23.2709	14.4369	24.3921	33.9607	22.9889	8.25271	28.374
A930007I19Rik	1.04004	4.79682	0	3.7422	8.58538	1.27656	0.861653	2.24971	1.37229	4.5022	0	1.23038	8.00489	0	1.00291	1.99166	0	0	1.89412	0	2.88235	2.64415	0	0
A930009A15Rik	0	0	0	0	0	0	0	0	0	0	0	0	0	0	0	0	0	0	0	0	0	0	0	0
A930011G23Rik	1.04237	0.965149	0	0	3.20586	3.81132	0	0.748807	1.35755	3.19584	1.2397	1.21941	6.35904	8.10163	6.98544	3.93091	0	0	0.950224	2.43124	0	0	0	0
A930012L18Rik	8.24194	5.71859	12.8137	3.67982	3.19378	2.55923	0	0	2.737	5.75943	0	0	3.18307	5.80488	0	2.98439	8.70326	0.966187	0	3.26453	5.80101	2.66068	1.82572	8.86531
A930013F10Rik	56.9564	51.7214	45.3768	45.517	69.2866	57.3624	57.5249	54.1418	57.5156	68.561	62.9877	69.9263	65.3583	55.7865	32.2398	56.7473	62.669	69.2795	42.8885	32.4847	84.2692	64.7655	50.9421	74.9194
A930015D03Rik	3.10057	2.8446	0.969564	1.91876	5.30297	6.29291	4.32144	0.754399	1.31621	1.87391	2.4536	1.21045	9.37558	5.72579	4.95928	3.86379	2.14341	2.91502	0.960073	5.74229	6.69083	10.7167	10.165	7.10991
A930016O22Rik	31.5182	52.2242	18.8052	15.7125	39.6751	18.5197	39.7932	31.5802	77.3062	41.4941	14.4758	23.6477	33.3747	55.2464	9.32765	19.3365	67.5228	33.3723	17.2037	23.5205	28.2089	41.957	16.0921	10.8437
A930017K11Rik	11.319	6.74586	4.66704	0.945234	11.7058	12.5404	23.718	9.59117	6.60924	22.72	14.2195	9.3214	22.0259	19.456	13.4892	18.3908	22.3577	5.87591	0.962691	3.24117	3.80247	0.912376	5.48907	4.46288
A930017M01Rik	12.461	3.8386	10.7682	2.82025	6.41292	7.60757	12.0024	11.9839	2.71908	13.43	8.69373	2.44604	11.172	4.64391	7.96937	20.6774	6.52055	18.2501	7.60385	13.8039	7.73108	3.56336	9.09244	10.5694
A930018P22Rik	8.18464	3.82542	4.68885	8.61511	7.42236	4.98359	6.22589	5.179	3.9072	3.03827	2.38202	2.35177	10.8478	5.68818	5.81383	3.65084	0	4.95962	0.969234	4.06453	0.940571	7.25118	9.33401	3.57603
A930019D19Rik	0	0	0	0	0	0	0	0	0	0	0	0	0	0	0	0	0	0	0	0	0	0	0	0
A930024E05Rik	19.6896	26.9508	18.3788	8.546	11.7861	2.51469	18.1263	17.8597	5.39274	19.6655	15.7941	26.6308	9.54334	17.3421	15.6732	11.5851	15.3167	20.2468	15.1613	9.74068	22.0654	12.598	13.6643	24.6696
A930031H19Rik	0	0	0	0	0	0	0	0	0	0	0	0	0	0	0	0	0	0	0	0	0	0	0	0
A930033H14Rik	37.2238	20.1968	30.2913	38.3427	54.5755	39.2597	41.3752	51.5294	47.7869	52.2179	38.456	35.3061	44.58	44.0668	47.6917	47.9627	43.4936	52.1209	49.3249	50.1949	24.0229	44.74	40.9791	46.6525
A930037H05Rik	14.4863	24.9943	20.4296	3.74906	20.2769	6.33161	23.2108	12.7432	23.1268	28.0368	16.1509	17.062	27.0121	8.12812	19.8876	23.5255	26.015	22.2178	15.1864	13.8054	27.0296	40.3721	23.6937	20.2634
A930041C12Rik	0	0	0	0	0	0	0	0	0	0	0	0	0	0	0	0	0	0	0	0	0	0	0	0
AA387883	0	0	0	0	0	0	0	0	0	0	0	0	0	0	0	0	0	0	0	0	0	0	0	0
AA388235	19.66	17.2046	12.9611	9.17702	11.699	6.41857	23.9917	18.8608	17.9883	19.2845	20.5354	9.88251	31.9479	29.1863	32.6669	13.1169	21.5587	13.4469	23.8978	19.4393	26.2376	15.8325	18.1773	24.6857
AA413626	3.16655	2.79363	0	0	2.14699	0	0	0.771599	2.55634	0.627418	0	1.21898	0	2.26335	0	2.96627	0	0.957919	0	1.6709	0	0	0.916614	3.56749
AA414768	11.3907	3.83274	19.633	31.8158	27.7663	11.424	8.64884	22.3615	35.3919	29.8951	25.9909	23.1188	12.7593	35.8844	18.9357	53.003	28.3986	27.8364	46.709	40.5523	19.2164	48.7808	54.4491	44.096
AA465934	3.09958	18.4684	6.94582	6.76499	15.6735	10.1608	13.0811	6.8903	2.54772	17.2607	16.0485	7.25741	1.53842	12.4086	6.10543	11.7378	8.46171	9.6994	0.990751	14.1784	3.82701	12.9929	2.80419	3.61623
AA467197	2.07469	3.75995	5.04062	12.0442	4.21505	1.28641	3.45545	6.11129	13.3789	6.3788	31.6954	1.22821	1.56804	5.75823	2.05826	9.07659	4.26706	3.85208	11.7121	15.6346	5.84216	15.6663	11.9531	5.35801
AA536875	0	0	0	0	0	0	0	0	0	0	0	0	0	0	0	0	0	0	0	0	0	0	0	0
AA543186	4.13376	0.957786	1.96533	0.931481	7.44885	2.54449	2.59623	1.49634	0	5.08657	3.74774	1.21788	11.0975	3.46705	2.00792	4.93689	0	6.71364	2.85781	5.68202	3.84868	3.55055	7.26193	0.881631
AA543401	0	0	0	0	0	0	0	0	0	0	0	0	0	0	0	0	0	0	0	0	0	0	0	0
AA545190	0	0	0	0	0	0	0	0	0	0	0	0	0	0	0	0	0	0	0	0	0	0	0	0
AA619741	0	0	0	0	0	0	0	0	0	0	0	0	0	0	0	0	0	0	0	0	0	0	0	0
AA792892	0	1.92928	0	0	0	0	0	0	0	0	1.23668	0	0	1.14234	0	1.96046	0	0	0	0	0	0	0	0
AA986860	15.4647	27.8968	35.4641	36.0267	19.269	40.1418	31.0501	20.1606	29.6139	40.7768	24.3762	39.6782	31.6504	24.2597	45.8665	53.417	52.3654	57.5719	68.2556	51.0048	46.8221	31.7664	54.1664	35.3487
AB124611	33.9863	25.9134	29.9033	38.8527	39.2674	35.8188	27.7928	38.3311	26.6479	33.0339	73.7385	55.0974	40.5088	24.0685	32.0839	38.4599	31.7925	42.5014	54.3156	46.9461	34.2196	49.2128	49.5069	28.4631
AF067061	0	0	0	0	0	0	0	0	2.72832	0	0	0	0	0	0	0	0	0	0	0	0	0	0	0
AF067063	0	0	0	0	0	0	0	0	0	0	0	0	0	0	0	0	0	0	0	0	0	0	0	0
AF357355	0	0	0	0	0	0	0	0	0	0	0	0	0	0	0	0	0	0	0	0	0	0	0	0
AF357359	0	0	0	0	0	0	0	0	0	0	0	0	0	0	0	0	0	0	0	0	0	0	0	0
AF357399	0	0	0	0	0	0	0	0	0	0	0	0	0	0	0	0	0	0	0	0	0	0	0	0
AF357425	0	0	0	0	0	0	0	0	0	0	0	0	0	0	0	0	0	0	0	0	0	0	0	0
AF357426	0	0	0	0	0	0	0	0	0	0	0	0	0	0	0	0	0	0	0	0	0	0	0	0
AF366264	0	0	0	0	0	0	0	0	0	0	0	0	0	0	0	0	0	0	0	0	0	0	0	0
AF529169	0	1.92437	0	4.7006	0	2.52597	1.72245	0.746546	0	0.635151	0	0	1.58918	0	0	1.94279	0	1.93487	1.8964	0	3.83187	0	0	0
AI115009	0	0	0	0	0	0	0	0	0	0	0	0	0	0	0	0	0	0	0	0	0	0	0	0
AI182371	4.12924	0	3.97711	2.77331	11.6772	0	0	0.75346	17.2515	5.43525	2.60143	13.9386	0	5.80441	2.95318	1.94189	6.22454	2.77916	0.923115	1.56666	4.02178	14.0242	7.17752	4.35011
AI197445	0	0	1.09833	2.5039	0	1.93593	0	0.482753	0	1.93559	0	0	5.0758	2.17287	1.87731	5.57898	0	0	1.45532	0	0	1.62502	0.830303	0
AI314278	0	0	0	0	0	5.04878	0	0	0	0	0	0	0	0	0	0	0	1.91823	1.92266	0	0	0	0	0
AI413582	106.611	101.962	97.5962	118.276	146.896	133.814	81.7322	108.028	126.704	127.149	149.588	169.621	133.276	94.462	97.1977	120.963	103.252	134.431	156.155	151.117	150.525	133.178	134.991	140.489
AI427809	21.8358	30.8872	8.93221	21.334	23.5832	12.7771	13.8639	10.6113	10.9288	29.3518	17.57	19.6181	28.4286	13.9393	14.0349	17.8046	12.8722	13.5664	13.2917	22.7458	17.3201	18.811	30.2219	30.8303
AI429214	25.897	26.6013	36.0511	19.353	24.3748	29.4962	25.8457	34.8864	39.4663	41.0754	35.522	56.6233	45.8878	30.1458	26.5986	31.2367	34.3001	23.1002	28.9023	26.1581	33.9611	26.3772	21.0293	36.3281
AI450353	21.4379	25.1326	21.863	1.70569	23.6462	20.0838	19.7672	26.1911	37.8033	20.0145	19.8832	35.1474	40.3793	18.7295	17.9761	43.3195	24.5571	44.0384	22.0604	30.5133	24.1165	29.7289	21.3778	21.6375
AI463170	0	0.964641	0	0	0	0	0	0	0	0	0	0	4.66287	0	0	0	0	0	0	2.42278	0	0	0	0
AI464131	448.015	439.94	526.524	422.744	437.141	433.343	407.399	485.548	427.375	511.665	566.218	449.44	572.331	685.892	586.719	545.928	328.702	400.407	420.339	394.73	370.404	433.447	374.831	382.336
AI467606	38.1564	48.0941	61.9213	48.763	79.7368	56.8154	37.3606	43.9993	68.5254	41.9541	74.3183	28.6324	47.3659	46.2117	34.3978	86.7675	52.6858	36.9807	39.2292	44.7117	61.4766	48.8749	58.4482	58.5875
AI504432	6.96743	9.78491	8.89013	9.17801	11.688	17.1604	9.39805	2.59034	22.7713	16.744	18.7393	27.0445	10.423	17.6086	2.63447	3.6106	9.40946	20.1385	14.1136	7.58201	12.685	15.9514	12.5993	6.54057
AI506816	8.26825	3.65896	7.27661	6.3707	6.2326	0	7.82291	1.57983	0	14.5023	4.03417	0	6.17269	5.71626	8.73349	7.32383	4.08903	5.74469	0.999891	6.60209	5.86643	11.7627	9.34701	3.62434
AI507597	0	0	0	0	0	2.52439	0	0	1.31084	0	0	0	0	0	0	0	0	0	0	0	0.961989	0	0	0
AI593442	31.7869	46.7964	43.1124	57.2969	59.3067	51.4525	36.2477	30.2663	28.1282	55.2737	62.0854	54.8908	79.7724	81.0884	81.8497	72.6828	37.6844	44.6516	34.7744	48.0042	41.5975	59.9642	54.3992	88.6702
AI597479	744.137	733.756	625.804	754.184	859.323	659.034	749.765	827.72	896.653	915.056	976.093	940.289	948.722	825.705	843.607	843.475	723.84	760.671	688.313	680.178	897.541	918.017	731.281	711.188
AI606473	2.06341	0	0	0	0	0	0	0	0	0	0	0	0	0	0	0	0	0	0	0	0	0	0	0
AI646519	0	0	0	0	0	0	0	0	0	0	0	0	0	0	0	0	0	0	0	0	0	0	0	0
AI661453	12.327	22.2114	31.0978	28.3488	8.55475	20.0258	17.4074	21.5041	24.1407	38.4741	21.6392	27.2005	33.1363	49.5495	37.6893	36.4162	17.6883	29.4222	41.8463	24.2444	11.4241	37.5354	29.3766	26.6026
AI662270	25.828	35.8295	35.3041	22.404	44.8566	25.9826	31.0994	36.3475	14.923	60.3778	94.653	51.8966	43.428	41.9561	35.5357	50.1006	67.1485	49.7209	60.513	27.2358	54.1001	60.8305	51.8487	48.2474
AI837181	614.083	656.33	571.896	623.05	680.533	712.986	657.981	652.331	783.63	899.295	840.456	890.124	647.736	689.785	794.334	805.301	749.165	744.888	689.175	729.508	768.024	724.392	706.287	707.557
AI839979	41.4032	42.0447	26.3304	21.7537	43.682	40.4567	28.4711	44.242	25.5537	36.1266	37.0362	35.2769	56.9628	36.9316	33.8052	62.5859	67.0555	51.1198	61.0064	31.8005	55.7326	40.1572	47.4968	59.1833
AI847159	1.0317	0	0	0	1.06833	0	0	0	0	0.637857	1.23169	0	0	0	0	0	0	0	0	0	0	0	0.913531	0
AI854703	12.351	27.987	41.8206	43.7209	27.7827	41.2923	39.0393	37.1836	46.909	76.7461	48.5169	73.0782	61.3682	78.3418	58.3622	52.9484	52.3067	23.4338	58.7625	49.4084	29.5244	33.6819	55.1402	48.5618
AI987944	241.26	190.095	179.347	161.677	243.099	241.55	238.679	173.028	305.689	262.699	263.934	230.469	310.366	190.694	124.613	162.333	239.472	223.001	188.123	177.759	234.967	194.322	203.69	221.897
AU015228	0	0	0	0	0	0	0	0	0	0	0	0	0	0	0	0	0	0	0	0	0	0	0	0
AU015791	0	0.962436	0	0	0	0	0	3.02482	0	0	0	1.21392	0	0	0	2.9239	0	0	0	0	0	1.77863	0.916865	1.76867
AU015836	0	0	0	0	0	0	0	0	0	0	0	0	0	0	0	0.965013	0	0	0	0	0	0	0	0
AU016765	0	0	0	0	0	0	0	0	0	0	0	0	0	0	0	0	0	0	0	0	0	0	0	0
AU018091	0	0	0	0	0	0	0	0	0	0	0	0	0	0	0	0	0	0	0	0	0	0	0	0
AU019990	1.66449	1.92441	0	2.96339	1.78716	0	2.16683	0	1.82954	0.687318	6.77636	1.65291	0	1.40864	2.44572	4.82891	0	0.523388	6.49554	0	0.556068	0	1.56818	0
AU021063	0	0	0	0	0	0	0	0	0	0	0	0	0	0	0	0	0	0	0	0	0	0	0	0
AU021092	89.5494	109.909	148.534	140.958	133.545	165.482	136.097	145.116	252.662	243.441	240.648	230.814	194.851	195.876	191.278	214.327	204.722	178.409	288.007	224.824	172.565	164.558	211.24	201.909
AU022252	234.402	186.778	194.573	227.888	259.571	222.247	221.481	186.977	257.773	303.836	268.923	251.638	246.531	281.546	248.46	270.861	292.29	186.258	221.928	256.561	299.381	245.18	347.527	255.912
AU022751	0	0	0	0	0	0	0	0	0	0	0	0	0	0	0	0	0	0	0	0	0	0	0	0
AU022754	0	0	0	0	0	0	0	0	0	0	0	0	0	0	0	0	0	0	0	0	0	0	0	0
AU022793	0	0.955534	1.97572	7.42731	2.12035	0	0	0.759859	0	1.90917	0	3.66827	0	1.16541	0	0	15.0466	0.974092	0	1.63856	0.972807	7.11784	4.60884	2.67365
AU023762	0	0	1.92704	0	0	0	3.35713	0	0	0	0	0	0	0	0	0	0	0	3.7899	0	0	0	0	0
AU040320	1551.43	1518.32	1507.77	1795.91	1832.72	1628.42	1798.93	1662.59	1786.3	1846.87	2002.8	2007.37	1741.1	2100.76	2150.74	1969.25	1409.2	1588.26	1395.86	1664.31	1603.35	1731.42	1691.41	1606.4
AU040972	0	0	0	0	0	0	0	0	0	0	0	0	0	0	0	0	0	0	0	0	0	0	0	0
AU041133	33.6568	54.1687	47.0673	60.679	31.7423	24.5122	42.5104	23.1879	29.8452	41.2409	30.0018	47.2052	29.8243	41.0154	5.84272	30.1809	14.2322	54.139	45.756	25.3809	46.2859	32.6466	54.7726	62.344
AV026068	443.394	520.711	405.108	344.737	467.712	535.569	444.933	436.192	839.063	524.362	632.89	716.296	512.233	559.873	550.299	483.907	488.377	530.141	492.358	506.77	528.772	507.498	498.831	554.171
AV039307	0	2.5712	0	0.710215	1.76145	3.11286	2.58544	1.22595	0	3.51861	4.80983	8.75521	0	4.82034	0	2.35721	0	3.19759	8.9926	2.71263	6.76143	6.85019	0	3.17395
AV051173	2.05611	0	1.90803	0.958978	3.16068	0	8.72129	1.49113	2.59824	1.84229	0	0	3.1121	0	0.983274	0.942211	2.17496	0	0.970751	1.64041	9.49633	1.78461	3.71098	7.16292
AV064505	0	0	0	0	0	0	0	0	0	0	0	0	0	0	0	0	0	0	0	1.61519	0	0	0	0
AV205837	0	0	0	0	0	0	0	0	0	0	0	0	0	0	0	0	0	0	0	0	0	0	0	0
AV320801	0	0	0	0	0	0	0	0	0	0	0	0	0	0	0	0	0	0	0	0	0	0	0	0
AW011738	319.067	307.393	306.19	342.398	281.628	278.175	259.195	255.775	303.122	265.71	265.715	385.421	261.17	241.316	203.342	222.491	282.429	247.731	301.269	370.801	347.656	339.832	308.705	299.189
AW046200	0	4.67031	1.01711	2.63425	0	3.92819	12.8476	3.09978	1.37682	5.71691	4.09217	1.24074	10.9015	3.49518	1.08319	3.12275	2.08572	3.90632	7.94113	2.46162	2.9632	0.85766	1.85909	5.39821
AW112010	189.838	226.403	259.146	255.367	338.081	278.535	299.539	293.591	327.113	403.489	603.404	400.111	254.835	297.908	366.832	323.938	280.454	286.58	277.232	362.861	337.434	312.148	326.025	370.342
AW146154	82.1527	85.9565	72.0874	79.823	49.9633	54.3326	93.8219	69.4593	75.4959	82.0477	89.2263	65.2375	107.267	85.351	59.1832	76.3936	58.354	118.14	69.2852	36.7235	71.394	90.5495	49.8754	74.3571
AW209491	335.767	263.695	269.793	288.022	322.149	295.042	315.137	248.971	349.794	346.34	367.654	312.017	280.998	337.953	346.858	347.063	235.635	245.325	249.971	303.524	307.766	301.64	336.396	245.106
AW495222	0	0	2.89056	0	0	0	0.856431	0	2.70856	1.27652	0	0	0	0	0	0	0	0	0	0	0	0	0	0
AW549542	14.4591	24.941	42.3891	22.8233	44.8772	35.1695	56.9124	32.1728	72.425	46.5557	34.2078	22.945	47.4075	56.5235	44.1452	37.4799	30.4013	44.7022	54.1288	26.8154	36.3569	37.0185	12.8436	43.2965
AW549877	993.992	940.692	790.929	969.27	930.618	948.314	1074.28	880.228	1180.82	1276.93	1068.27	1205.13	1091.45	1047.33	916.548	998.377	899.018	881.761	813.315	751.774	1076.37	1028.92	909.136	1050.54
AW551984	8.30414	4.77589	9.97406	7.39223	5.34092	22.5448	10.319	13.579	6.76974	12.0084	43.7239	11.2216	17.7148	25.8036	20.5032	26.6438	30.4534	18.2731	24.057	4.08248	12.6827	34.4351	22.8016	20.3928
AW554918	200.168	204.823	180.698	202.77	191.967	184.605	199.799	192.921	227.067	260.527	199.941	252.039	242.093	228.616	238.979	211.891	270.578	174.809	196.359	188.679	243.201	205.569	180.008	218.974
AW822252	0	0	3.84316	7.64229	0	0	0	0	0	0	0	3.59539	0	1.15017	2.9477	0	2.16019	2.91044	0	0.812498	7.63547	0.901605	0.919231	0
AY074887	0	0	0	0	0	0	0	0	0	0	0	0	0	0	0	0	0	0	0	0	0.952697	0	0	0.89217
AY358078	0	0	0	0	0	0	0	0	0	0	0	0	0	0	0	0	0	0	0	0	0	0	0	0
AY512915	0	0	0	0	0	0	0	0	0	0	0	0	0	0	0	0	0	0	0	0	0	0	0	0
AY512931	0	0	0	0	0	0	0	0	0	0	0	0	0	0	0	0	0	0	0	0	0	0	0	0
AY702102	0	0	0	0	0	0	0	0	0	0	0	0	0	0	0	0	0	0	0	0	0	0	0	0
AY702103	0	0	0	0	0	0	0	0	0	0	0	0	0	0	0	0	0	0	0	0	0	0	0	0
AY761184	0	0	0	2.79818	0	0	2.56406	0.746886	0	0	0	0	0	0	0	0	0	3.89256	0	0	0	0	0	0.883552
AY761185	0	0	0	0	0	0	0	0	0	0	0	0	0	0	0	0	0	0	0	0	0	0	0	0
Aaas	224.707	308.861	245.326	208.001	222.114	237.217	289.22	267.894	270.471	364.552	322.107	319.655	348.594	274.433	297.426	279.431	289.369	269.495	259.666	297.828	235.981	293.402	275.075	259.45
Aacs	91.4757	88.6564	113.082	113.023	112.169	133.1	87.5063	128.203	102.376	94.1882	147.309	102.487	127.942	87.753	131.576	103.113	100.966	92.1001	127.426	110.777	156.668	134.008	138.555	177.255
Aadac	0	0	0	0	0	0	0	0	2.73819	0	0	6.16649	0	0	0	0	0	0	0	0	0.961989	0	0	0
Aadacl2	0	0	0	0	0	0	0	0	0	0	0	0	0	0	0	0	0	0	0	0	0	0	0	0
Aadacl3	0	0	0	0	0	0	0	0	0	0	0	0	0	0	0	0	0	0	0	0	0	0	0	0
Aadacl4	0	0	0	0	0	0	0	0	0	0	0	0	0	0	0	0	0	0	0	0	0	0	0	0
Aadat	0	1.87785	0.989912	0	0	0	0	0	0	0	0	0	0	0	0	0	0	0	0	0	0	0	0	0
Aaed1	432.467	420.941	436.881	427.417	449.386	532.002	466.953	471.065	524.795	531.398	576.999	565.447	569.333	452.274	483.263	520.403	413.943	424.317	387.93	389.527	486.953	481.819	471.32	454.119
Aagab	553.92	525.834	552.955	674.074	566.887	685.031	496.217	601.844	656.647	696.148	791.645	638.188	689.564	646.333	645.03	679.782	517.891	613.179	608.479	567.763	568.188	652.041	560.105	673.115
Aak1	2898.56	2376.25	2416.83	2305.81	2365.51	2346.99	2422.87	2496.34	3206.37	3122.35	2957.25	3077.45	2846.74	2428.2	2888.62	2702.44	2602.58	2507.93	2553.29	2654.19	2793.27	2586.07	2710.55	2684.12
Aamdc	758.49	951.013	745.622	887.599	794.186	872.511	1026.41	941.735	1054.07	1094.01	997.142	1135.99	898.372	1044.97	886.344	915.045	642.829	822.66	827.852	853.262	862.997	861.358	881.667	872.584
Aamp	2040.14	2186.59	1961.08	2005.84	2179.62	2359.02	2207.32	2339.79	2470.92	2510.93	2436.82	2582.45	2181.59	2542.55	2568.46	2417.32	1733.92	2004.14	2069.67	2025.54	2196.26	2217.63	2060.02	2255.39
Aanat	0	0	0	0	0	0	0	0	0	0.633634	0	0	0	1.16035	0	0	0	0	0	0	0	0.86714	0	0
Aar2	545.635	602.372	564.304	512.567	518.128	634.723	627.786	654.928	724.259	776.433	678.331	790.595	682.178	596.943	734.973	700.034	606.446	607.981	636.968	617.803	643.244	609.717	672.989	615.185
Aard	1.02274	4.7088	0.980298	0	0	0	5.20062	1.50267	0	0	0	6.05187	0	0	0	0.980316	12.873	2.91523	2.89356	1.62051	0	1.76966	0	2.66642
Aars	1944.21	1868.19	1862.64	2058.36	1869.69	1913.37	1866.82	1830.96	2290.45	2221.05	2344.98	2309.19	2303.4	2136.4	2288.11	2081.03	2176.66	1888.29	2245.19	2109.21	1986.24	2166.86	2769.5	2213.13
Aars2	780.427	749.566	775.296	728.662	747.524	740.443	716.494	821.461	1035.01	975.642	890.048	995.719	918.03	925.407	949.894	942.046	832.223	735.486	755.42	721.746	846.14	757.796	763.263	847.611
Aarsd1	627.681	639.46	655.125	595.347	604.552	667.863	625.383	764.311	909.395	819.966	855.536	865.352	765.09	840.353	763.609	764.967	662.606	623.337	617.747	595.663	672.13	596.138	725.874	585.56
Aasdh	326.076	322.673	352.254	263.858	379.891	288.717	322.14	349.905	480.949	442.336	439.485	472.42	382.893	360.982	348.644	353.686	287.825	391.943	318.179	372.189	333.667	366.973	364.096	411.41
Aasdhppt	431.617	393.975	399.211	461.225	426.93	509.261	437.891	409.32	580.924	545.857	560.972	549.505	553.141	521.481	506.139	511.031	263.359	410.083	345.267	352.929	404.064	441.284	419.542	509.962
Aass	14.5013	12.4053	10.9177	26.6348	10.6001	15.3919	17.1892	11.3568	23.2584	27.5877	8.88988	12.2882	12.6817	8.15044	19.3429	22.0551	2.15052	14.4668	14.4047	8.14739	15.5747	10.6129	7.30557	12.3929
Aatf	247.061	285.28	264.939	263.96	301.918	264.084	281.656	288.469	339.036	318.589	276.933	341.314	330.426	281.815	300.795	222.626	266.803	289.324	283.014	284.469	245.734	320.104	238.125	309.63
Aatk	132.326	137.444	164.325	134.068	133.729	136.729	212.597	164.789	207.517	197.01	240.729	196.133	251.315	227.372	194.782	163.641	142.268	131.713	142.849	120.328	148.835	111.673	104.909	140.044
Abat	1188.98	1214.35	1019.06	1358.58	982.444	841.35	1023.04	997.765	1145.46	1338.85	1041.76	1422.35	1134.21	1276.67	1185.55	1263.28	1493.76	1342.4	1492.38	1365.3	934.017	1147.53	1033.76	1109.78
Abca1	1347.26	1387.27	1057.16	1097.75	1007.58	1103.08	1132.19	952.789	1673.6	1296.82	1511.9	1462.89	1444.44	1347.63	1152.8	1433.42	1093.31	1386.6	1395.47	1236.13	1213.91	1247.18	1439.8	1151.49
Abca12	213.348	244.947	305.68	170.841	387.142	320.79	411.868	333.693	422.967	285.799	322.059	191.849	334.055	292.739	390.211	224.765	98.6456	155.805	129.26	161.972	201.338	135.166	134.61	169.214
Abca13	1.04367	0	0	0.922033	0	0	0	0	1.37164	0	2.56224	0	0	0	2.02359	1.99431	0	0	0.950859	0	0	0	0	0.866333
Abca14	0	0	0	0	0	0	0	0	0	1.28405	5.06399	1.2267	0	0	0	2.02139	0	0	0	0	0	0	0	0
Abca15	0	0	0	0	0	0	0	0	0	0	0	0	0	0	1.9686	0	0	0	0	0	0	0	0	0
Abca16	0	0	0	2.79818	1.08822	0	0	0	0	0	0	0	1.59168	0	0	0	0	0	0	0	0	0	0	0
Abca17	0	0	0	0	0	0	0	0	0	0.632989	0	2.41898	0	0	0	3.86005	0	0	0	0.805028	0	0	2.70769	0
Abca2	2796.84	2191.29	2234.27	2442.9	2372.07	1937.98	1961.45	2239.76	2676.59	3146.5	2744.46	2785.55	2928.88	2824.23	2659.53	2708.37	2487.14	2519.19	2484.9	2656.55	2589.39	2526.69	2805.95	2707.25
Abca3	709.954	719.612	739.46	651.859	899.135	787.071	722.814	741.646	804.947	929.403	1067	839.694	886.874	943.982	943.3	893.844	691.417	793.806	640.828	765.509	794.934	772.839	788.858	755.89
Abca4	81.6009	142.862	83.5113	93.8767	89.963	81.5682	98.9681	112.636	261	132.862	61.1236	156.043	69.7672	176.023	143.81	82.7425	36.9975	63.0726	39.6194	85.9119	77.6046	61.7486	66.6968	79.18
Abca5	338.093	318.828	223.749	257.578	288.277	319.58	313.676	276.676	332.088	356.923	299.774	335.43	333.908	304.106	278.768	295.215	195.013	301.509	260.097	241.754	322.995	340.568	319.967	302.987
Abca6	354.541	368.804	502.345	469.46	381.286	450.582	403.602	482.616	517.494	551.765	628.089	467.535	550.878	633.731	521.148	580.417	369.437	481.815	499.619	474.34	580.361	383.4	403.42	472.476
Abca7	567.386	608.364	630.045	599.225	508.55	753.992	637.913	572.505	722.938	711.005	946.241	642.338	698.48	704.296	674.941	714.483	657.169	585.728	700.315	582.34	650.167	542.713	599.197	571.981
Abca8a	2126.53	1827.93	2274.11	1932.61	2084.36	2104.53	2701.3	2506.55	2852.51	3388.2	3050.64	2827.87	3266.41	3237.24	2929.07	3358.01	2817.89	2944.82	2500.21	2782.81	3044.81	2920.57	2798.49	2871.08
Abca8b	638.862	599.677	706.751	650.582	637.949	595.702	785.187	729.749	861.042	945.276	941.595	761.776	1139.88	836.381	794.096	878.503	1033.39	987.398	741.379	773.337	986.141	823.329	936.548	926.262
Abca9	647.849	605.1	708.526	686.657	769.712	655.43	812.383	813.133	752.462	1101.71	950.597	955.719	969.773	911.639	837.905	960.376	1075.21	925.388	734.098	845.852	931.094	922.554	848.353	842.852
Abcb10	1412.58	1244.23	1349.35	1210.63	1189.04	1421.87	1344.29	1419.75	1618.16	1551.51	1679.05	1497.32	1233.15	1619.8	1590.69	1499.43	1163.98	1257.06	1190.79	1201.63	1281.24	1311.97	1385.83	1334.73
Abcb11	6.22527	3.84401	0	5.63814	0	0	1.724	0	0	0.639716	0	1.2165	3.19257	0	0	2.93949	4.36317	4.76497	0	2.42436	3.85292	1.78807	9.03887	0.877169
Abcb1a	683.104	749.941	884.004	728.801	801.158	907.122	857.726	867.207	857.284	1013.84	1044.03	949.989	1148.68	1036.23	988.48	947.621	726.176	846.075	944.996	795.267	1051.28	1002.07	800.495	1103.01
Abcb1b	292.29	250.885	310.04	203.137	263.437	243.889	367.145	284.389	323.21	355.69	367.757	329.899	332.854	393.158	346.452	323.121	352.394	319.227	341.642	335.831	326.155	270.531	233.755	294.928
Abcb4	1379.38	1095.4	1093.31	1315.24	1203.27	1221.44	1031.58	1146.29	1224.55	1225.37	1127.08	1330.2	1243.32	1153.19	1168.36	1306.79	1712.82	1426.01	1268.74	1296.02	1228.31	1346.97	1710.41	1306.53
Abcb5	0	0	0	0	0	0	0	0	0	0	0	0	0	0	0	0	0	0	0	0	0	0	0	0
Abcb6	679.05	676.524	729.831	692.056	703.1	675.883	608.566	720.932	824.576	755.763	824.579	866.048	765.648	720.077	757.009	690.923	698.468	713.846	688.743	786.574	782.925	775.945	874.594	757.334
Abcb7	1176.53	925.453	1019.08	1077.66	913.191	940.537	983.94	896.76	1497.67	1370.59	1275.51	1344.08	1384.58	1145.47	976.572	1018.76	1040.23	1109.28	963.237	902.729	1126.98	1059.71	1102.07	1143.29
Abcb8	1884.25	2053.11	1773.25	1786.93	1921.35	1944.07	1978.13	2155.31	2335.06	2242.61	2324.76	2203.4	2172.78	2208.26	2554.42	2224.59	1692.5	1768.61	1891.51	1856.96	1995.11	1779.77	1830.96	1869.03
Abcb9	392.138	391.165	416.123	404.703	412.028	416.697	381.016	461.087	418.296	383.138	555.535	422.152	402.854	503.634	406.036	407.075	465.554	338.885	392.399	383.904	466.353	519.297	567.46	467.923
Abcc1	1176.3	984.585	964.319	1024.05	1119.59	1156.5	1134.52	1128.71	1254.74	1539.75	1477.76	1522.18	1454	1304	1592.31	1625.28	1786.23	1480.74	1334.52	1334	1457.26	1377.14	1749.41	1384
Abcc10	181.955	178.39	155.799	143.853	191.876	126.372	131.181	170.022	174.419	185.788	200.315	156.44	253.333	197.57	204.719	190.768	123.696	152.973	153.295	177.439	190.757	195.91	196.221	199.547
Abcc12	0	0	0	5.65932	0	1.25333	0	0.744103	0	0	0	0	0	0	0	0.968266	4.34321	0	0	1.61965	0.95822	0	1.82358	0
Abcc2	2.05849	0	0	1.86991	0	0	0	0	0	0	0	3.66698	0	0	0	0	4.34923	0	5.64743	0	0.961989	0	0	0
Abcc3	67.8371	48.1007	57.3662	72.0054	82.1263	48.6859	55.7778	76.6752	60.0002	83.8719	92.5406	52.3187	62.3807	67.8279	71.9325	58.9964	107.176	90.9185	119.666	74.5184	77.0601	83.4047	103.32	84.3591
Abcc4	566.78	584.564	549.363	610.762	626.498	540.09	530.644	560.215	621.071	643.156	866.587	718.374	776.499	669.506	700.228	610.014	663.679	576.729	540.462	614.197	634.496	606.55	758.608	618.146
Abcc5	957.801	918.594	889.834	793.847	1059.03	1045.3	994.132	861.243	1240.9	1371.91	1279.94	1202.93	1146.11	1260.21	1031.32	1259.82	1058.08	999.832	927.71	944.193	1153.61	993.541	934.798	983.629
Abcc6	0	0	0	0	0	0	0	1.49263	0	0	0	0	0	0	0	0	0	0	0	0	0	0	0	0
Abcc8	985.703	1035.36	951.211	849.809	927.638	1133.39	1064.36	1195.98	1388.29	1295.11	1424.47	1151.7	1466.2	1471.9	1429.38	1237.28	935.304	1017.82	919.887	830.775	948.871	963.657	945.997	1068
Abcc9	12171	11579.3	11940.2	10823.1	12960.7	12597.5	13108.5	12495.6	15820.5	14523.6	14199.2	13967.3	14365.1	14985.4	14402.4	13140.3	8155.28	10053.2	8470.76	9486.45	10534	10566.8	8403.51	9858.14
Abcd1	1173.98	1074.88	1217.07	1072.05	1215.55	1091.9	1136.92	1183.77	1359.55	1393.46	1475.61	1411.34	1446.62	1425.85	1470.68	1490.31	1341.96	1184.61	1203.56	1251.54	1316.96	1171.78	1355.06	1230.61
Abcd2	163.896	151.846	170.671	185.041	154.615	175.707	144.346	169.555	201.377	216.888	227.276	193.531	180.182	137.885	117.815	150.775	201.247	177.856	154.265	128.112	138.577	110.791	176.662	131.492
Abcd3	2792.54	2548.27	2951.61	2852.44	2799.01	2475.19	2791.61	2699.78	3982.91	3619.08	3420.75	3380.26	3738.81	3397.04	2697.16	3181.33	3032.73	2727.39	2674.64	2598.64	2657.03	2841.74	3370.63	2850.04
Abcd4	162.58	218.893	188.219	183.172	171.077	166.861	163.235	135.178	170.151	188.642	255.548	177.876	178.534	285.76	222.627	247.777	207.029	196.591	267.93	169.031	211.244	198.447	215.923	213.716
Abce1	1500.84	1416.99	1579.16	1527.37	1523.95	1486.36	1361.67	1483.53	1893.14	1822.9	1747.03	1792.29	1892.91	1523.33	1446.44	1503.71	1491.65	1451.39	1499.71	1460.69	1692.14	1848.75	2221.5	1925.64
Abcf1	2689.37	2642.81	2442.25	2445.58	2478.5	2438.74	2745.96	2657.4	3173.06	3325.88	3069.57	3363.31	3095.3	2793.89	3118.53	3028.98	3067.99	2666.48	2780.19	2843.22	2820.23	2847.28	2971.88	2874.43
Abcf2	1706.3	1746.28	1650.24	1648.43	1817.69	1614.39	1824.96	1836.33	2411.79	2181.95	2012.64	2377.38	1825.8	1953.95	2209.46	2101.7	1915	1643.88	1814.68	1957.39	1908.54	1767.69	1929.18	1787.26
Abcf3	1251.56	1335.79	1254.62	1339.5	1299.03	1352.88	1251.53	1281.35	1552.01	1554.09	1462.67	1550.4	1386.46	1431.96	1482.07	1394.03	1313.23	1328.39	1202.09	1236.53	1257.12	1356.79	1449.67	1386.64
Abcg1	145.126	154.145	83.8501	137.079	141.273	211.506	159.277	172.213	171.347	194.903	337.679	232.235	208.996	192.433	186.087	206.352	184.517	201.102	206.29	220.665	164.878	174.94	303.812	158.759
Abcg2	607.464	549.37	491.614	684.871	544.341	591.658	585.885	587.987	866.961	784.265	871.886	815.658	571.153	752.834	707.091	841.164	745.234	832.786	911.029	926.234	810.047	859.637	830.613	864.948
Abcg3	19.7566	23.9386	31.1692	21.282	33.1779	16.6201	42.21	23.1693	45.4807	22.0767	56.3883	22.2099	19.2585	27.8799	16.1766	36.3472	17.379	16.1597	22.8146	16.247	20.2541	22.0157	27.9344	14.037
Abcg4	5.13442	6.74865	4.75588	3.79163	3.21387	6.25141	0.865338	2.23566	6.72235	5.60728	7.28737	8.36233	0	10.3646	6.78474	14.1297	13.1132	6.8742	10.416	9.69204	3.80702	8.22912	23.0366	12.3836
Abcg5	0	0	2.89056	0	0	0	0	0	4.08128	1.27075	0	0	0	0	0.982286	0.966993	0	0	0.946438	0.809285	0	0	0	0
Abcg8	0	0.959596	1.91682	0.94263	0	2.51354	0	0	0	0	2.46087	1.20945	4.76104	3.48115	0	0	0	0	0	0	0	0	0	0
Abhd1	30.8874	42.0542	53.8485	40.0157	44.8247	36.3667	36.2575	45.033	71.9939	84.1936	67.2473	34.8874	67.3933	81.4171	49.826	64.6353	47.6508	60.6816	37.143	42.2477	43.6958	32.4381	50.6422	35.3323
Abhd10	329.172	338.87	263.089	359.976	326.679	323.764	284.916	382.662	414.969	346.913	380.171	447.263	428.4	426.463	350.753	323.898	306.851	295.233	281.964	294.617	343.725	326.916	292.804	393.389
Abhd11	779.843	765.699	866.966	779.094	824.728	843.292	804.343	867.758	1062.73	1106.78	947.805	1169.82	869.902	848.265	1032.61	962.577	772.039	892.207	856.312	901.619	882.556	838.583	996.668	855.622
Abhd11os	0	2.802	2.8553	2.88054	5.24899	10.2045	0	3.7667	1.27919	5.5005	2.39572	8.19907	4.69339	1.13124	0.993778	0.936891	6.66141	3.87951	4.00181	9.10725	5.73243	0.878251	6.43315	11.8712
Abhd12	1055.65	1150.6	1115.58	1232.09	1123.86	1093.21	1084.73	1137.88	1451.67	1336.32	1373.14	1526.65	1199.69	1381.56	1304.93	1295.51	1348.92	1301.17	1333.68	1248.56	1313.39	1398.71	1509.72	1331.83
Abhd12b	0	0	0	0	0	0	0	0	0	0	0	0	0	0	0	0	0	0	0	0	0	0	0	0
Abhd13	372.442	393.699	414.671	393.698	350.065	355.196	417.05	389.662	639.043	497.104	581.029	458.502	441.575	544.183	523.931	492.136	401.773	422.722	377.133	386.593	404.853	412.793	369.806	372.586
Abhd14a	232.697	263.255	204.493	224.688	235.714	262.564	253.224	278.171	363.029	344.685	297.535	301.392	291.495	284.604	310.217	301.155	237.938	270.687	263.839	263.692	260.562	287.873	276.157	285.761
Abhd14b	302.797	262.381	269.387	276.423	270.273	249.236	320.539	288.261	338.04	361.017	363.977	335.913	334.557	301.471	354.883	333.434	185.979	215.693	372.456	242.735	306.381	301.983	231.568	308.219
Abhd15	49.4501	30.8533	33.4009	24.6264	35.3098	52.6429	41.7635	34.1274	46.9078	46.8463	39.8489	37.0169	47.3257	56.3881	53.4981	44.3859	28.5395	66.2711	49.3851	84.1792	34.2485	64.4723	67.8607	45.9274
Abhd16a	971.187	1156.9	1087.07	1135.33	1146.21	1135.81	1160.12	1104.95	1303.16	1461.24	1334	1412.76	1207.37	1425.88	1334.56	1334.71	1028.7	1176.67	1227.04	1191.92	1212.55	1304.7	1079.08	1314.8
Abhd16b	0	0	0	0	0	0	0	0	0	0	0	0	0	0	0	0	0	0	0	2.42278	0	0.905645	0	0
Abhd17a	727.722	741.215	792.837	715.399	699.753	830.91	764.89	841.205	940.676	891.939	816.374	933.026	853.319	828.408	930.936	880.498	656.915	739.406	860.31	791.646	886.702	813.553	793.417	932.788
Abhd17b	143.08	136.738	122.586	168.024	186.196	146.43	162.264	131.184	208.884	215.633	137.57	162.767	144.768	153.588	165.18	185.245	113.177	134.973	131.054	134.021	159.549	155.526	131.908	136.625
Abhd17c	542.226	636.271	547.519	598.627	583.873	620.982	587.278	615.782	661.276	618.748	680.08	706.009	696.454	677.567	710.098	596.023	473.028	551.068	563.993	500.25	560.056	679.765	585.257	611.183
Abhd18	1150.83	1341	1279.96	884.585	1222.16	1208.74	1188.01	1039.69	1984.44	1311.73	1417.54	1411.8	1463.77	1371.87	1368.35	1215.71	942.014	1113.39	1077.38	995.572	1221.84	1196.11	1019.53	1289.59
Abhd2	248.983	243.236	307.018	345	310.409	309.701	353.482	345.354	327.948	390.289	436.002	367.947	425.294	425.083	426.289	383.514	458.208	439.112	326.424	380.68	475.207	410.83	318.372	379.643
Abhd3	121.472	115.389	91.317	66.5059	86.0034	88.4335	84.7354	81.8028	103.113	117.09	96.7124	93.034	93.2187	99.0609	87.6788	95.6477	69.807	85.1288	82.7537	79.577	98.4342	67.3862	55.4065	87.951
Abhd4	1149.13	1311.6	1151.74	1242.31	1365.05	1339.96	1381.1	1255.75	1510.08	1720.42	1653.59	1805.86	1498.89	1736.9	1723.39	1732.45	1563.17	1426.31	1460.19	1666.14	1672.76	1530.51	1453.58	1541.98
Abhd5	1293	1326.19	1294.78	1365.93	1352.91	1320.2	1482.38	1454.52	1656.79	1707.55	1656.24	1498.01	1456.78	1474.57	1414.49	1498.63	1244.78	1379.11	1331.97	1280.46	1539.31	1459.69	1596.79	1439.72
Abhd6	230.429	265.736	230.842	257.233	277.582	216.546	315.987	234.308	306.272	307.059	320.523	294.785	305.438	395.203	286.399	312.956	245.709	257.576	302.944	255.115	257.198	268.912	273.133	213.037
Abhd8	382.728	427.101	503.333	385.757	382.808	467.239	482.093	522.703	505.662	490.972	681.027	575.568	455.747	621.989	595.037	525.163	364.37	394.883	346.529	367.191	388.021	406.603	346.584	452.347
Abi1	639.888	595.423	530.628	611.835	607.801	723.703	651.593	609.427	763.849	724.486	984.178	878.743	761.12	719.092	699.584	736.723	754.378	683.49	691.985	667.785	715.701	754.543	821.288	782.271
Abi2	328.093	336.202	345.172	355.141	357.407	345.204	318.391	292.272	360.809	473.564	457.211	409.437	443.225	434.778	358.013	443.534	361.84	434.644	348.269	378.856	367.258	359.031	381.312	426.056
Abi3	291.653	326.046	209.81	332.961	241.643	248.777	233.448	260.799	337.01	343.018	548.612	365.579	295.817	282.89	347.58	369.753	413.599	239.469	281.043	353.519	394.983	328.56	318.379	399.52
Abi3bp	211.369	158.33	297.95	211.501	229.903	323.96	382.447	277.207	326.435	372.302	470.269	282.665	435.186	334.677	344.251	322.174	633.885	349.336	319.169	360.615	428.844	408.619	280.501	397.937
Abl1	1823.2	1867.67	1747.47	1451.98	1736.13	1889.48	2096.02	2144.88	2279.89	2277.9	2515.63	2616.47	2202.75	2190.4	2365.93	2348.89	1796.76	1955.27	1865.77	2177.53	1967.58	1797.98	1751.88	1853.56
Abl2	862.12	762.511	775.077	760.558	826.703	857.521	883.86	847.598	1112.28	973.724	979.957	973.999	953.479	991.224	968.834	1018.96	846.751	907.554	769.486	885.728	966.575	1113.48	963.333	939.436
Ablim1	17989.4	16221	14521.7	13809	16354.6	14483.3	14982	15041.5	23129.1	19318.9	18629	21617.4	17435.8	18461.3	17621.2	18314.4	15127.1	14990.8	15808.4	17144.1	16770	17389.9	16142.4	15694.3
Ablim2	665.964	789.219	729.607	558.931	833.374	770.629	906.063	822.352	1082.43	943.105	1010.05	915.702	995.45	1003.27	992.772	932.339	682.53	773.495	769.067	704.816	650.627	645.494	636.451	721.969
Ablim3	2068.51	1798.29	1600.62	1593.22	2022.65	1762.68	1947.75	1644.97	2376.47	2311.01	2255.34	2409.92	2016.93	2107.19	2325.77	2238.66	1505.88	1614.14	1605.08	1630.31	1799.17	1636.48	1298.36	1863.01
Abo	0	0	0	0	0	0	0	0	0	0	0	0	0	0	0	0	0	0.97314	0	0	0	0	0	0
Abr	818.037	964.497	972.03	975.045	1190.31	1078.95	1051.87	1074.97	1158.06	1300.14	1535.05	1357.89	1429.09	1384.84	1450.19	1369.93	1116.96	1227.6	1178.36	1141.11	1310.05	1072.08	1011.63	1132.64
Abra	1368.14	1371.38	1132.16	1880.12	1430.04	1330.8	1052.7	958.38	1447.77	1223.01	930.656	1545.6	944.207	877.768	948.861	1101.44	1535.26	1304.16	2261.29	1949.75	1957.43	2155.17	2850.7	2182.69
Abracl	259.18	270.518	268.648	290.54	279.432	385.818	311.358	227.503	311.004	260.775	299.437	274.59	288.761	342.749	203.797	267.095	249.37	242.801	204.659	203.183	240.952	225.534	247.097	289.573
Abraxas1	258.07	339.159	319.864	372.182	282.174	329.323	328.856	341.83	355.736	374.182	301.339	334.651	443.622	345.794	383.926	327.908	269.451	306.222	265.454	272.148	295.569	314.359	320.573	299.589
Abraxas2	557.904	513.744	573.826	586.417	520.773	617.134	524.734	583.339	714.511	567.993	682.932	719.02	673.137	571.707	652.222	559.379	594.555	599.809	557.477	599.899	616.546	747.812	642.917	672.182
Abt1	200.853	218.725	258.22	185.777	251.57	217.727	220.327	242.39	292.492	226.96	247.9	328.295	285.144	312.382	238.984	292.698	321.175	225.372	206.032	207.886	257.932	249.388	280.135	247.883
Abtb1	429.187	445.36	501.353	440.128	504.391	413.438	427.751	444.702	579.835	488.738	550.32	545.033	550.208	575.86	486.248	532.971	427.674	444.026	539.772	446.215	491.034	439.76	410.317	477.724
Abtb2	904.099	772.674	953.448	914.2	847.67	1025.98	907.61	883.763	850.052	933.809	919.681	813.015	759.59	895.256	978.823	944.688	852.892	898.798	850.109	1012.96	1140.44	1089.43	1060.48	1009.91
Acaa1a	1272.3	1539.79	1326.88	1179.9	1384.11	1596.95	1274.43	1486.95	1636	1628.26	1808.85	1512.41	1480.66	1528.48	1618.07	1497.53	1323.88	1348.44	1444.65	1373.85	1388.79	1433.24	1459.02	1430.02
Acaa1b	7.18534	0.9586	1.88555	1.89519	0	0	0	1.48611	6.70514	2.49803	2.42892	1.19483	6.31768	0	0	0.937119	0	0	0	0	0	0	3.68704	0
Acaa2	15717.2	18124.6	18523.1	13408.8	16760	16214.1	17294.1	18808	24351.9	20628.1	20891.7	19090.9	17721.5	20123.3	21487.4	17530.9	10232.6	11963	11983.5	12048	14522.7	12387.1	12667.1	12852.1
Acaca	665.668	631.307	547.756	593.995	519.231	545.975	496.69	530.825	775.971	683.14	761.322	697.527	669.736	563.554	649.294	558.031	641.865	627.028	628.028	612.848	634.021	627.416	769.569	618.187
Acacb	12804.9	11751.7	11344.1	9226.09	11026.1	10803.3	10611.3	10645.2	13863.6	12403.5	13200.3	12679.6	11850.6	12424.3	12883.1	11648.9	9850.17	9111.83	8877.87	10009.9	10718.3	10540.7	9937.86	9509.69
Acad10	136.844	122.275	119.501	111.863	97.4097	139.045	115.567	171.875	203.395	192.219	177.064	133.395	127.901	169.815	174.51	150.38	71.8344	120.407	152.333	133.489	127.844	108.406	127.907	136.014
Acad11	5851.74	5761.59	5904.86	6076.5	5837.16	5870.45	5728.49	5913.71	7430.4	7099.27	6625.08	6792.66	6573.98	6980.25	6554.6	6580.34	4763.9	4781.04	5259.02	5312.68	5380.47	5312.13	5552.56	5617.03
Acad12	1649.65	2085.19	1568.45	1622.09	1877.2	1892.85	1760.98	1886.79	2541.01	2188.92	2039.3	2013.05	1803.79	2147.73	2323.65	1951.77	1334.08	1672.48	1480.39	1757.95	2009.11	1724.39	1573.98	1850.69
Acad8	1046.58	945.807	930.706	867.315	1009.84	1040.64	953.623	1006.64	1189.27	1168.39	1212.5	1062.19	969.88	1088.14	1244.01	1137.7	657.826	893.313	922.096	798.718	806.868	807.617	855.163	891.555
Acad9	1154.7	1055.7	996.09	1009.53	1103.11	1073.23	1091.64	1236.58	1323.3	1399.56	1326.69	1140.46	1191.73	1215.16	1212.78	1247.9	967.348	1015.01	939.88	989.565	978.614	1096.93	1103.75	1183.67
Acadl	22722.2	24171.5	22671	20177	23459.9	22894	22661.2	24146.6	31302.6	28822.6	27031.3	26626.4	26845.6	26978.3	28088.2	25287.4	20292.8	21137.9	21737	21894	22996.4	23436.3	22476.1	22875.4
Acadm	28974.6	31195.1	29451.6	24887.2	29763.3	29056.2	28937.5	30269.7	37801.6	33717.9	31249.7	31652.5	31294.7	31656.3	32724.1	28622.9	17977.8	21955.8	22263.3	21773.2	24610.1	24662.6	22289.7	24140
Acads	4718.17	5014.01	4915.15	4299.06	4766.55	4714.6	4926.91	5142.08	6029.53	5905.67	5571.11	5704.61	4971.17	5462.46	6005.87	5177.71	3367.51	3995.34	4201.95	4126.63	4586.3	4332.21	4124.89	4465.83
Acadsb	3871.47	4151.51	3874.65	3331.01	3756.73	3637.2	4057.25	3479.88	5448.55	4494.24	4114.42	4239.79	4293.28	3800.13	3675.35	3561.37	3118.06	3272.08	3393.87	2766.19	3301.62	3205.9	3132.11	3313.94
Acadvl	19956.8	22327.5	21734.7	16945.1	19952.5	20077.7	20385.7	21793.3	28700.5	24857.5	25356	23660.3	21517.5	24745	25449.8	22534.7	16607.2	18324.1	18889.2	18064.1	19547.9	18997.3	20614.3	19390.7
Acan	4.07091	0.968321	2.85695	3.79014	4.2856	1.25798	0	0	0	11.2702	0	1.19324	1.58947	7.99161	5.85946	6.66786	39.5669	19.4738	20.5495	43.7546	0.958613	10.0338	12.8033	21.2415
Acap1	14.3979	22.1042	16.2251	27.5243	33.1517	22.5419	24.211	26.8923	12.0631	23.7089	29.1921	9.57432	29.9417	33.4231	28.245	10.4216	13.0978	32.329	12.3386	30.7822	28.5893	35.5171	14.7422	14.1614
Acap2	877.665	748.739	662.254	708.213	738.854	792.863	729.346	619.722	1002.2	956.599	1045.7	1010.16	1077	793.618	722.828	861.901	826.984	825.363	788.833	796.851	884.837	843.799	808.868	803.983
Acap3	495.179	369.599	456.133	404.954	454.726	514.993	451.162	430.488	632.461	559.097	655.476	541.211	575.31	563.384	559.446	573.813	640.858	508.947	574.273	562.415	535.676	565.985	464.748	562.418
Acat1	13325.4	14271.2	14071.5	12864.3	14635.1	13177.6	14626.7	14739.9	18201.9	16833.5	15340.2	16116.7	14793.9	15454.2	16240.5	14986.9	10986.6	12056.9	13253.2	11915	13142.4	12491.5	12573.4	13303.1
Acat2	116.725	90.0168	101.969	79.1263	83.0917	135.239	113.633	115.755	91.7086	141.015	99.3111	153.043	169.126	110.991	119.361	183.195	116.697	136.782	124.82	105.765	108.625	104.075	116.401	84.8226
Acat3	2.081	0	0	0	0	0	0	0	1.3535	0	0	0	0	0	0.9854	0	0	0	0	0	2.87414	0	2.73828	0
Acbd3	648.149	735.226	645.745	761.153	744.839	818.951	707.428	690.81	990.146	875.865	960.561	778.558	918.956	745.993	735.687	783.035	658.426	658.848	667.426	694.275	737.542	802.752	788.794	758.536
Acbd4	192.564	278.215	277.494	237.188	250.071	297.705	278.312	289.251	343.716	299.08	335.492	269.579	296.878	271.459	302.495	303.595	271.002	276.388	282.807	270.955	333.172	307.461	235.026	280.51
Acbd5	605.571	524.07	527.999	500.882	502.138	546.26	546.94	518.164	793.963	768.764	688.905	623.119	776.152	531.622	493.743	474.402	605.49	776.899	642.825	518.517	681.991	667.575	564.646	724.263
Acbd6	588.698	623.136	594.399	589.672	600.583	704.151	566.481	563.478	736.287	755.471	717.965	769.128	737.238	675.242	771.739	644.231	539.905	677.842	696.809	628.11	682.892	666.79	689.168	680.446
Acbd7	0	4.56943	4.16399	9.05244	0	3.92335	6.84266	7.80806	7.98748	5.06608	1.36092	1.24266	1.55652	4.56486	4.39823	4.22019	0	8.64788	1.00482	6.60955	2.95794	2.49908	1.86456	5.44604
Accs	128.823	166.968	137.848	140.859	153.513	142.826	143.224	157.874	134.678	188.159	140.762	162.217	173.395	176.635	165.071	132.709	139.497	121.731	121.824	140.875	157.43	156.45	102.588	131.858
Accsl	0	0	0	2.79818	0	0	4.28257	0.743935	1.34566	0	0	0	0	0	0.981806	0	0	0	0	0.815981	0	0	0	0
Acd	191.484	209.354	211.39	187.187	204.548	230.01	238.332	231.733	219.933	268.607	244.326	296.477	317.395	256.513	243.62	263.015	173.64	175.532	221.78	231.211	226.86	219.056	233.335	230.115
Ace	2809.17	2235.38	2428.76	3123.74	1800.45	1491.95	2008.56	1989.8	2412.41	3012.79	2825.9	3349.54	2674.25	2508.08	2434.54	2852.94	5267.56	3718.67	4712.39	4518.96	3093.47	3475.91	4682.5	3340.43
Ace2	52.0026	54.6324	55.7096	50.3209	42.8352	29.3246	11.1461	14.1978	34.3889	43.2147	81.4595	39.4138	45.0127	36.069	40.1952	20.0005	56.6604	23.8239	58.9075	26.722	30.1457	26.6017	57.1819	30.0455
Ace3	0	0	0	0	0	0	0	0	0	0	0	0	0	0	0	0	0	0	0	0	0	1.81129	0	0
Acer1	0	0	0	0	0	0	0	0	0	0	0	0	0	0	0	0	0	0	0	0	0	0	0	0
Acer2	1158.14	1093.82	580.536	683.781	486.98	655.565	658.755	729.688	1212.45	913.28	1473.35	1410.54	745.917	834.594	697.582	920.282	1020.72	798.343	1778.02	932.242	593.152	611.676	682.221	771.585
Acer3	154.857	163.305	190.038	123.603	160.863	214.125	156.142	185.145	182.908	204.349	290.974	226.207	222.412	161.838	153.796	184.213	179.35	128.542	116.853	137.983	148.638	183.483	216.879	167.981
Ache	66.7148	84.8428	72.3791	90.845	112.041	70.1387	59.3733	78.5727	85.2476	78.9526	69.5216	75.4264	105.498	58.6417	85.9959	77.1494	26.5817	84.3868	91.7746	78.5213	57.9754	32.8881	47.775	92.5191
Acin1	2409.37	2356.51	2415.04	2099.87	2224.12	2563.16	2652.02	2362.8	3047.74	2858.53	3174.95	3300.13	2768.72	2674.01	3020.43	2624.53	2628.84	2377.96	2460.42	2503.54	2853.66	2559.57	2770.54	2259.99
Ackr1	1.03257	4.78268	0	1.90837	8.54634	7.53333	7.76485	7.50225	0	8.15177	15.8758	9.65991	7.87262	16.1203	3.93443	8.67126	2.15771	10.6842	7.59434	5.6877	7.64804	14.4057	10.1263	6.19257
Ackr2	32.1936	83.4037	44.2762	37.1768	34.1502	64.4071	23.7898	51.685	68.5662	102.698	91.9146	97.516	81.728	67.7971	80.0537	84.9795	116.08	58.783	147.003	99.9496	70.773	104.617	106.745	116.715
Ackr3	1817.44	1930.82	2093.44	2475.37	2453.27	2163.16	2075.52	2149.57	2046.33	2379.2	2293.87	2684.34	2255.46	2174.97	2349.42	2263.08	2389.01	2087.85	2225.96	2747.87	3112.62	2427.99	3097.07	2790.58
Ackr4	66.3386	101.797	62.3534	144.603	73.7089	92.2031	107.626	92.6366	102.884	160.562	108.475	195.086	149.386	134.28	139.76	184.101	184.393	164.406	216.071	234.272	150.865	148.612	116.365	146.009
Acly	1105.15	1075.51	1163.73	1108.55	1219.25	1158.49	1176.79	1159.28	1256.4	1262.35	1401.46	1438.44	1192.65	1427.45	1279.17	1299.7	1227.21	1140.41	1163.72	1094.23	1282.56	1309.68	1010.33	1255.8
Acmsd	0	0	0	0	0	0	0	0	0	1.28813	0	0	0	0	2.08853	0	0	0	0	0	0	0	0	0
Acnat1	0	0	0	0.932727	0	0	0	0	0	0	0	0	0	0	0	0	0	0	0	0	0	0	0	0
Acnat2	0	0	0	0	0	0	0	0	0	0	0	0	0	0	0	0	0	0	0	0	0	0	0	0
Aco1	846.561	832.341	954.285	933.946	1008.13	1041.09	965.484	1145.58	1056.28	1136.62	1069.92	1089.07	1133.6	1221.5	1222.85	1094.53	842.047	975.596	878.742	1044.12	1033.37	1135.43	1150.7	1051.25
Aco2	71510.9	70960.9	68697.4	62428.5	70150.2	70670.3	67775.6	69571.9	89839.3	80972.2	80339.3	79860.7	72376.8	77965.1	80964.5	73885.6	65113.2	63046.1	70694.5	66258.7	67034.9	66765.9	69520.7	67598.6
Acod1	3.08476	0	6.90133	3.69021	1.06523	0	0	0	0	4.40421	92.2935	8.4885	3.14514	0	0	6.92856	0	4.84787	11.4281	0	2.91063	9.80704	0	1.77366
Acot1	179.086	290.113	267.174	113.14	286.154	183.337	306.259	241.958	381.555	315.598	362.375	290.609	410.378	385.022	405.639	227.85	140.735	121.687	92.5136	163.11	282.26	177.175	185.021	148.36
Acot10	1.04362	2.87177	1.02511	5.58943	3.22159	0	0	2.98085	1.38203	5.85604	1.25573	3.71914	1.60797	0	6.11016	2.04423	0	15.9635	2.84782	0.812983	2.86111	6.94133	5.3599	3.49162
Acot11	1003.01	960.159	830.369	714.302	742.857	755.137	874.051	852.597	1262.09	1227.51	1124.52	1241.51	925.306	1045.3	926.776	974.088	1234.22	1027.94	1215.31	1224.72	1010.52	873.143	1246.68	896.157
Acot12	0	0	0	0	4.20147	0	0	4.55332	0	0	2.60412	3.70597	0	0	0	1.02224	0	0.958562	0	0.808764	0	0	3.61915	2.63059
Acot13	4884.43	5312.4	5252.25	4984.06	5420.09	4907.14	5311.82	5258.58	6573.11	6323.36	5493.1	6952.27	5668.14	5868.86	5568.96	5929.38	4681.92	5058.55	5405.61	5660.27	5581.25	5364.86	5523.38	5734.56
Acot2	1687.84	1734.09	1779.67	1524.15	2154.67	1975.96	1775.1	1877.3	2791.52	2377	2175.12	1901.24	2593.74	2678.8	2824.96	2068.94	1381.01	1553.2	1462.64	1677.56	1907.6	1981.83	1748.74	1749.95
Acot3	28.4221	31.3171	24.6066	16.0356	10.4229	32.6453	14.0762	15.2325	35.3293	10.1309	45.9985	20.6706	29.8135	20.9042	16.6237	19.6287	8.45889	14.7754	6.42311	8.97344	16.6175	4.36394	10.6164	11.6792
Acot4	8.21629	16.1831	18.6576	20.026	10.5179	10.2724	20.8889	21.3372	28.2513	24.526	39.8067	8.48233	18.6749	24.1244	23.6863	13.7962	21.2345	9.82795	9.74466	11.4292	27.1332	26.5956	16.6757	15.1432
Acot5	0	0	0	0	0	0	0	0	0	1.9009	0	0	0	0	0	0	0	0	0	0	0	0	0	0
Acot6	15.5142	26.0108	51.6056	21.9477	38.4807	42.5762	50.7345	48.7786	55.4451	47.339	78.9099	38.1331	53.3615	66.2254	74.7074	58.1319	63.5651	38.8614	38.1576	35.661	51.245	38.8353	37.5609	52.0817
Acot7	1363.43	1240.28	1237.82	1325	1485.25	1365.29	1426.99	1495.2	1700.71	1753.54	1597.92	1814.22	1724.91	1761.86	1742.02	1601.85	1257.2	1397.25	1155.14	1269.87	1508.7	1392.35	1368.29	1362.92
Acot8	124.478	110.478	119.191	98.9131	135.672	139.49	109.978	137.853	158.556	173.208	119.084	166.282	123.221	163.27	128.564	172.057	132.405	112.742	108.092	132.174	143.532	134.641	112.363	171.326
Acot9	426.781	386.773	407.233	467.353	425.865	550.168	425.37	481.248	512.946	529.042	577.8	557.374	484.167	615.224	555.091	570.015	524.681	590.039	579.526	534.225	607.482	543.232	562.908	605.767
Acox1	10264.3	10952.3	9527.08	9899.67	10673.9	9511.75	10140.6	9953.84	13822.1	12856.1	11537.7	12238.7	11894.4	13041.5	13182.1	12430.9	9814.73	11053.3	11614.6	11754.7	10472.7	11454.5	10898.5	10991.2
Acox2	12.8698	13.2557	10.4519	14.0061	12.096	22.0072	22.0992	14.6095	11.8197	27.888	7.56435	28.624	35.9533	28.2928	30.4166	8.49186	11.017	41.6849	17.298	22.6407	5.90368	21.1368	13.1897	28.3187
Acox3	829.528	946.879	917.099	953.436	974.488	996.589	928.675	1069.88	1007.63	1250.64	1142	1127.24	1085.15	1103.75	1044.87	1113.53	1117.72	1023.63	1066.16	1043.75	1105.44	954.984	1150.74	1075.4
Acoxl	0	0	1.92258	3.78659	0	1.2552	0.86214	1.48982	0	0.633634	0	0	0	4.64407	1.96748	0	0	0	6.60483	1.61828	0	0	0	0.881031
Acp1	632.248	707.364	682.138	611.609	682.74	643.602	654.239	720.73	1028.84	858.362	952.743	959.645	721.059	846.43	886.197	836.311	659.64	717.421	680.144	699.345	737.382	669.629	752.517	708.747
Acp2	851.905	798.83	948.471	998.95	906.808	997.19	929.335	960.751	981.746	1115.42	1354.11	945.214	1090.67	1182.16	1116.97	1125.76	1088.48	1017.15	1105.82	1031.71	1063.32	1047.67	1223.15	1026.35
Acp4	0	0	0	0	0	0	0	0	0	0	0	0	0	0	0	0	0	0	0	0	0	0	0	0
Acp5	22.31	13.6941	15.9505	27.1155	27.0121	34.7894	17.9872	15.4882	31.3675	19.6481	27.0234	26.9469	40.256	30.5865	41.7742	33.6094	50.7189	6.91977	38.5439	22.7569	45.1211	41.8861	39.6792	33.9529
Acp6	525.244	532.6	557.644	438.992	449.991	505.361	509.772	466.686	705.842	630.075	574.008	576.873	542.013	553.761	609.506	665.04	424.198	454.689	439.72	436.852	513.572	486.743	492.872	477.169
Acp7	0	0	0	0	0	0	0	1.49263	0	0	0	0	0	0	0	0	0	0	0	0	0	0	0	0
Acpp	4.1421	0	1.97838	4.64261	8.45581	1.17693	4.7671	4.15486	8.25108	1.67843	4.36186	0	1.44508	2.10228	1.81703	0	2.07493	0.916846	0.908999	1.55007	1.93709	6.23041	0.910455	3.53176
Acr	5.37466	3.99064	22.8023	16.707	6.98018	6.48302	6.22435	0	22.3406	11.0887	5.09729	3.74664	20.0376	8.52304	16.1009	12.1644	2.18371	11.6799	14.3335	7.309	21.901	12.0961	5.70237	11.9711
Acrbp	69.7978	67.2443	70.2256	51.6657	65.3121	59.8602	73.676	76.2812	91.6404	74.8166	92.4261	102.743	48.0396	70.0414	61.1707	62.7282	78.0727	67.6848	32.2056	46.5332	73.4044	85.1778	57.314	43.2107
Acrv1	0	0	0	0	0	0	0	0	0	0	0	1.20826	0	0	0	0	0	1.9175	0	0	0	0	0	0
Acsbg1	4.11772	15.4026	12.3637	9.47087	6.41254	12.5411	21.6438	9.68646	28.1856	8.73929	16.9812	5.96537	23.6923	41.5174	7.78715	17.982	0	5.8708	6.66104	3.24287	11.454	5.4615	4.58586	4.4295
Acsbg2	0	0	0	0	0	0	0	0	0	0	0	0	0	0	0	0	0	0	0	0	0	0	0	0
Acsf2	1604.68	1612.94	1472.94	1351.39	1603.58	1438.93	1609.2	1426.11	1978.66	1903.31	1980.27	1846.13	1888.09	1635.19	1917.37	1656.29	1627.38	1443.76	1196.62	1456.79	1607.8	1364.28	1483.26	1347.66
Acsf3	619.377	773.246	730.208	696.619	717.036	671.23	780.726	849.946	850.148	936.252	975.397	833.388	776.526	900.034	983.555	879.378	698.478	671.33	734.205	777.199	742.173	685.468	871.011	663.817
Acsl1	25963.8	23509.9	25898.5	23413.6	25649.6	23321	24650.5	26658	35032.1	31772.9	29771.8	29403.6	31832.5	33038.2	30726.1	30564	24330	24648.5	23201.4	25872.3	26992.6	26779	29174.1	25269
Acsl3	126.488	175.341	190.568	210.382	221.341	144.319	133.252	133.199	196.593	145.676	166.955	140.961	256.801	147.507	121.693	136.05	146.542	150.098	129.678	103.988	143.314	175.983	135.342	158.9
Acsl4	355.05	278.908	388.053	315.175	320.578	322.493	348.834	293.468	430.353	368.55	387.079	335.893	418.955	415.526	281.976	320.345	333.348	409.274	383.548	328.753	386.549	349.831	425.008	448.766
Acsl5	469.664	501.615	480.768	482.961	565.082	535.031	549.088	538.637	555.777	662.213	860.832	716.234	605.677	602.816	586.207	673.78	660.457	538.967	623.474	599.464	572.975	663.615	697.543	693.462
Acsl6	534.271	519.808	557.191	513.557	520.631	551.903	466.031	509.832	391.366	479.624	518.741	319.61	338.163	443.239	420.21	331.447	349.864	362.921	297.213	275.731	300.183	277.012	445.117	310.043
Acsm1	0	0	0	2.79818	0	0	0	0	0	0	0	0	0	0	0	0	0	0	0.947474	0	0	0	0	0
Acsm2	1.02488	0.946465	0.988568	0	0	0	0	0	0	0	0	0	0	0	0	0	0	0	0	0	0	0	1.82706	0
Acsm3	0	0	0.976908	0	0	1.25372	0	0	0	0.646661	0	2.46496	1.59217	2.31919	1.00972	3.00669	0	1.91158	3.81809	0	0	3.53186	0	1.7634
Acsm4	0	0	0	0	0	0	0	0	0	0	0	0	0	0	0	0	0	0	0	0	0	0	0	0
Acsm5	331.594	490.011	507.189	350.866	404.501	391.433	389.371	403.127	527.103	520.932	494.024	439.553	441.913	476.991	496.463	429.069	156.015	216.659	266.122	220.625	224.679	192.268	208.99	221.283
Acss1	10453.4	11915.9	10681.3	8358.1	10536.4	11011.6	11282	11534.8	14801.3	12203.1	11636.2	12545.1	11255.3	12937.6	13291.3	10907.4	7300.13	9135.05	9819.73	9759.74	10455.8	9896.95	9581.36	9764.27
Acss2	834.657	820.642	946.82	917.451	874.92	892.053	899.109	940.466	1107.82	1099.03	1022.11	1201.93	1015.24	1068.32	1027.69	1161.31	1172	1196.09	1108.69	1128.52	1245.97	1178.94	1356.15	1118.55
Acss2os	0	0	1.92704	0	0	0	0	0	0	0	0	0	0	0	0	0	0	0	0	0	0	0	0	0
Acss3	25.0016	19.2738	17.5362	23.3377	25.7262	12.5855	15.8908	14.1413	14.7991	17.1787	19.4545	15.9317	36.6539	12.7196	4.91624	13.5867	8.73572	5.76064	9.47369	18.6744	10.2969	7.1112	10.8012	13.9544
Acta1	11862.1	4431.5	4281.26	16947.5	5571.01	3806.23	4799.1	5105.45	7879.08	13949.5	3102.93	18951.9	6776.69	5548.92	4441.93	12302.2	25989.3	23343.3	23617	24631.3	26665.4	35172.5	54265.2	34801.5
Acta2	2290.88	1646.62	2580	2389.94	1996.18	1854.88	2756.95	2535.43	3957.94	4569.16	4171.25	4791.46	3825.57	4269.62	3281.6	5161.92	5178.66	3618	3588.7	4211.23	3163.32	2453.12	3268.93	3615.77
Actb	8023.84	7005.38	9322.84	9310.05	10941.7	10527.8	9718	9806.73	8987.36	9486.65	13502	10733.9	10945.2	10861.6	9704.82	11756.6	10835.2	8276.08	8992.95	8761.78	10361.2	10286.1	11952.4	10154.4
Actbl2	0	0	0	0	0	0	0	0	0	0	0	0	0	0	0	0	0	0	0	0	0	0	0	0
Actc1	294535	228371	274746	350893	276151	287820	297772	323908	344527	333284	311292	357833	288772	324249	284732	352810	342865	301082	276429	331601	330275	315595	386524	319022
Actg1	6899.86	6804.77	7720.74	7832.18	8892.5	10054.5	8520.49	10019.7	8893.35	8360.98	10688.6	9528.58	8012.82	9799.11	8334.07	10824.3	7842.4	7367.95	8671.71	8225.53	9790.46	9165.21	11213	9539.63
Actg2	29.9665	9.56494	22.1294	7.61456	30.8904	26.4172	36.2708	17.9812	22.6717	30.0858	24.4184	15.6642	47.3174	52.9717	20.649	44.1571	30.406	35.9427	29.5856	24.4355	19.1531	38.6836	24.7802	32.7898
Actl10	0	0	0	0	0	0	0	0	0	0	4.76922	0	0	0	0	0	0	0	0	0	0.955979	1.82268	0	0
Actl11	0	0	0	0	0	0	0	0	0	1.9009	0	0	0	0	0	0	0	0	0	0	0	0	0	0
Actl6a	397.827	445.013	492.541	452.417	470.425	491.402	465.671	497.567	646.863	626.823	584.443	592.386	604.046	582.477	568.989	560.795	446.88	492.133	434.065	494.064	549.641	607.313	568.498	476.814
Actl6b	0	0	0	0	0	0	0	0	0	0	0	0	0	0	0	0	0	0	0	0	0	0	0	0
Actl7a	0	0	0	0	0	0	0	0	0	0	0	0	0	0	0	0	0	0	0	0	0	0	0	0
Actl7b	0	1.9314	0	0	0	0	0	0	0	0	0	0	0	0	1.9529	0.938541	0	0	0	0	0.961349	0	0	0
Actl9	0	0	0	0	0	0	0	0	1.33922	3.13464	1.22829	0	0	1.14606	0	0	8.69619	0.980586	0	0	1.91314	1.80947	0	1.77656
Actn1	776.388	890.248	759.483	847.532	884.149	702.316	1009.17	968.57	993.677	1143.39	1324.91	1197.82	986.131	1097.95	1070.18	1171.15	1599.48	1241.05	1291.97	1309.81	1089.46	1370.66	1538.32	1299.31
Actn2	68189.2	61603.1	57612.9	62034.2	64365.3	61925.4	62267.4	59940.3	75207.7	72590.6	65261	72522.8	68588.6	69801.3	72833.1	71644.4	75705.5	66889	65222.5	75821.8	75926.6	75255.8	76008.4	70179.2
Actn3	3.08522	7.69781	4.76227	4.74042	4.27888	3.75768	6.05474	4.4764	0	4.98991	2.42954	2.38915	4.73807	5.77153	8.77076	5.68555	4.3698	5.87377	1.89705	3.23603	0.953079	0.911579	0.919718	3.5411
Actn4	3465.56	3334.42	3453.09	3709.99	3736.3	3433.5	3752.84	3684.58	4196.12	4314.32	4611.74	4710.15	4128.27	3950.66	4441.7	4406.69	4691.55	3728.67	4417.37	4318.46	4045.97	4409.56	4578	4611.22
Actr10	935.36	947.033	1052.7	1020.84	944.584	1227.1	1059.59	1159.67	1337.76	1362.22	1371.47	1291.77	1162.11	1214.05	1267.72	1216.19	999.765	1017.56	1061.33	1081.68	1256.36	1150.95	1054.31	1198.16
Actr1a	2746.74	2842.09	2955.85	2859.2	3007.87	2990.09	2861.29	2890.36	3467.8	3581.04	3434.04	3663.05	3158.26	3259.55	3511.98	3406.24	3158.61	3233.79	3168.12	3420.89	3178.26	3246.43	3701.57	3300.77
Actr1b	1891.21	1758.23	1814.46	1706.53	1799.09	1992.35	1849.37	1862.48	2027.69	2246.29	2087.87	2182.59	1897.9	1926.24	2143	2137.98	1778.24	1992.87	2046.72	1958.51	1989.54	2062	2517.58	2083.84
Actr2	1840.73	1654.06	1638.13	1824.97	1682.28	1924.87	1716.01	1849.57	2051.37	2290.86	2354.8	2100.05	2037.34	1855.17	1851.46	1853.06	1763.65	1969.6	1741.24	1783.63	1878.5	2226.27	2158.32	2050.15
Actr3	2331.82	2117.2	2372.38	2616.28	2616.46	2822.7	2589.54	2629.76	3092.66	2849.37	3292.51	2943.99	2758.65	2929.05	3056.1	3487.82	3042	2689.3	2685.38	2727.05	2924.33	3058.38	3470.44	3010.6
Actr3b	769.228	959.917	874.508	851.403	819.215	905.904	849.366	1023.11	1103.17	1179.7	983.658	1059.19	1214.41	1066.82	1117.74	996.522	801.052	943.327	817.632	778.839	838.71	806.188	631.435	758.883
Actr5	73.0958	91.3423	146.656	104.523	137.721	140.147	111.563	66.7714	131.028	136.136	145.218	141.826	111.41	169.312	162.53	138.324	98.9536	122.785	116.722	114.015	124.059	132.883	111.575	116.349
Actr6	173.755	186.4	141.739	149.576	184.249	211.111	189.973	221.209	202.264	240.141	225.06	202.614	196.35	173.189	172.944	166.567	160.827	184.54	181.677	188.545	184.915	201.657	188.695	190.072
Actr8	821.759	826.435	786.578	835.491	806.947	805.54	918.953	794.914	1019.74	1004.6	944.406	915.966	1019.63	1061.24	884.467	892.659	728.117	834.522	773.412	753.619	892.363	868.391	794	812.533
Actrt1	0	0	0	0	0	0	0	0	0	0	0	0	0	0	0	0	0	0	0	0	0	0	0	0
Actrt2	0	0	0	0	0	0	0	0	0	0	0	0	0	0	0	0	0	0	0	0	0	0	0	0
Actrt3	0	0.964641	0	0	0	0	0	0	0	0	0	0	1.59298	0	0	0	0	0	0	4.03797	3.84401	0	0.910624	1.7649
Acvr1	294.34	363.665	433.35	358.784	373.553	450.414	404.866	438.646	458.349	441.376	493.494	456.184	519.605	508.527	520.43	517.876	497.124	459.494	425.49	462.306	505.479	470.868	469.177	481.166
Acvr1b	535.624	560.236	628.558	465.953	484.037	602.815	553.308	609.806	692.123	736.158	639.534	714.571	681.667	791.429	571.004	702.594	591.108	646.704	598.49	652.986	607.876	677.173	632.219	541.927
Acvr1c	0	0.936423	1.0539	0.851687	3.95916	1.37158	0	0	0	5.86283	7.24653	2.5376	0	0	0	1.11915	0	3.85456	0.98867	0	5.79924	0	0	0.866168
Acvr2a	493.19	418.825	394.835	533.037	463.111	479.263	480.264	407.381	658.301	575.294	435.28	555.103	678.579	529.491	370.533	425.578	369.497	531.596	432.012	402.993	623.905	620.984	502.236	554.533
[truncated: 22,975 more rows]
