# Supplementary material for: A murine model of hypertensive heart disease in older women
Source: PeerJ journal article supplement (doi:10.7717/peerj.17434), 2024-05-23
Supplement: Supplemental_data_AngII.pdf [file Supplemental_data_AngII.pdf]

**A murine model of hypertensive heart disease in elderly women.**

Audrey Morin-Grandmont, Élisabeth Walsh-Wilkinson, Sara-Ève Thibodeau, Dominique Boudreau, Marie Arsenault, Yohan Bossé, Jacques Couet\*

Groupe de recherche sur les valvulopathies, Centre de recherche de l'Institut universitaire de cardiologie et de pneumologie de Québec, Université Laval, Québec City, Québec, Canada

\*: Correspondence to [jacques.couet@med.ulaval.ca](mailto:jacques.couet@med.ulaval.ca)

**Table S1.** Echo data from young 4-month-old mice receiving a continuous AngII infusion for 14 or 28 days. Results are expressed as the mean  $\pm$  SEM for the indicated number of animals. Statistical differences between CTRL and AngII (AngII) mice were analyzed using Student's T-test. a:  $p < 0.05$  and d:  $p < 0.0001$  between groups.

| Parameters              | Ctrl N=8         | Ang 14d N=8       | AngII 28d N=8     |
|-------------------------|------------------|-------------------|-------------------|
| <b><i>M-Mode</i></b>    |                  |                   |                   |
| EDD, mm                 | 3,7 $\pm$ 0,04   | 3,6 $\pm$ 0,09    | 3.7 $\pm$ 0,12    |
| ESD, mm                 | 2,7 $\pm$ 0,07   | 2,3 $\pm$ 0,10    | 2,6 $\pm$ 0,12    |
| PW, mm                  | 0,70 $\pm$ 0,016 | 0,82 $\pm$ 0,030d | 0,88 $\pm$ 0,023d |
| IVS, mm                 | 0,66 $\pm$ 0,030 | 0,82 $\pm$ 0,026d | 0,83 $\pm$ 0,023d |
| RWT                     | 0,39 $\pm$ 0,015 | 0,46 $\pm$ 0,013c | 0,47 $\pm$ 0,018d |
| <b><i>Simpson's</i></b> |                  |                   |                   |
| SV, mm                  | 26.0 $\pm$ 1,42  | 27.6 $\pm$ 1,33   | 25,3 $\pm$ 2.15   |
| EF, %                   | 56,4 $\pm$ 2.15  | 59,6 $\pm$ 3,26   | 54,5 $\pm$ 2.19   |
| HR, bpm                 | 438 $\pm$ 19.8   | 454 $\pm$ 19.1    | 498 $\pm$ 9.48    |
| CO, ml/min              | 11,8 $\pm$ 0,89  | 12.5 $\pm$ 0,72   | 13,2 $\pm$ 1.06   |
| EDV, $\mu$ l            | 46,1 $\pm$ 1,57  | 46,2 $\pm$ 1,87   | 46.2 $\pm$ 3.43   |
| ESV, $\mu$ l            | 20.1 $\pm$ 1,16  | 19,2 $\pm$ 2.51   | 25,3 $\pm$ 2.15   |
| <b><i>Doppler</i></b>   |                  |                   |                   |
| E, mm/s                 | 572 $\pm$ 27,5   | 635 $\pm$ 27,9    | 597 $\pm$ 39.8    |
| A, mm/s                 | 356 $\pm$ 22,6   | 334 $\pm$ 19,8    | 367 $\pm$ 23,8    |
| E/A                     | 1,64 $\pm$ 0,093 | 1,92 $\pm$ 0,072  | 1,65 $\pm$ 0,112  |
| E', mm/s                | -26,2 $\pm$ 1,68 | -27,2 $\pm$ 1,95  | -26,5 $\pm$ 1,66  |
| A', mm/s                | -17,9 $\pm$ 0,95 | -17,7 $\pm$ 1.08  | -18,6 $\pm$ 1,49  |
| E/E'                    | -22,1 $\pm$ 0,78 | -23,8 $\pm$ 1.15  | -22,7 $\pm$ 1.05  |
| E'/A'                   | 1,46 $\pm$ 0,051 | 1,54 $\pm$ 0,067  | 1,45 $\pm$ 0,095  |

**Table S2:** Echo data from adult mice treated or not with AngII. Left ventricle parameters were measured in 12-month-old female (F) mice, ovariectomized (Ovx) or not, and treated or not for 28 days with AngII. Results are expressed as the mean  $\pm$  SEM for the indicated number of animals. Statistical differences between Non-Ovx and Ovx mice, and between CTRL and AngII mice were analyzed using two-way ANOVA and Holm-Sidak post-test for multiple comparison. a:  $p < 0.05$ , b:  $p < 0.01$ , c:  $p < 0.001$  and d:  $p < 0.0001$  between Ovx group and its corresponding Control group (F12 or F12 AngII, respectively). e:  $p < 0.05$ , f:  $p < 0.01$ , g:  $p < 0.001$  and h:  $p < 0.0001$  between an AngII group and its corresponding Control group (F12 or F12 Ovx, respectively).

| Parameters       | F12<br>N=12      | F12 AngII<br>N=8  | F12 Ovx<br>N=11-12 | F12 Ovx AngII<br>N=8 |
|------------------|------------------|-------------------|--------------------|----------------------|
| <b>M-Mode</b>    |                  |                   |                    |                      |
| EDD, mm          | 3,8 $\pm$ 0,07   | 3,4 $\pm$ 0,05f   | 3,9 $\pm$ 0,08     | 3,8 $\pm$ 0,07a      |
| ESD, mm          | 2,6 $\pm$ 0,08   | 2,1 $\pm$ 0,07f   | 2,7 $\pm$ 0,10     | 2,7 $\pm$ 0,07c      |
| PW, mm           | 0,84 $\pm$ 0,018 | 1,13 $\pm$ 0,026h | 0,92 $\pm$ 0,022a  | 1,02 $\pm$ 0,044a,e  |
| IVS, mm          | 0,76 $\pm$ 0,022 | 0,89 $\pm$ 0,020f | 0,83 $\pm$ 0,023   | 0,91 $\pm$ 0,036     |
| RWT              | 0,42 $\pm$ 0,011 | 0,59 $\pm$ 0,015h | 0,45 $\pm$ 0,016   | 0,51 $\pm$ 0,027a,e  |
| <b>Simpson's</b> |                  |                   |                    |                      |
| SV, mm           | 35,8 $\pm$ 1,93  | 26,1 $\pm$ 0,84f  | 33,4 $\pm$ 1,78    | 26,6 $\pm$ 1,95e     |
| EF, %            | 65,8 $\pm$ 1,64  | 67,1 $\pm$ 2,25   | 63,2 $\pm$ 1,55    | 58,5 $\pm$ 1,88a     |
| HR, bpm          | 482 $\pm$ 6,1    | 510 $\pm$ 6,4     | 477 $\pm$ 7,0      | 520 $\pm$ 16,9e      |
| CO, ml/min       | 17,2 $\pm$ 0,85  | 13,3 $\pm$ 0,56e  | 15,9 $\pm$ 0,77    | 13,8 $\pm$ 0,86      |
| EDV, $\mu$ l     | 54,8 $\pm$ 3,22  | 39,2 $\pm$ 2,05f  | 52,9 $\pm$ 2,45    | 45,4 $\pm$ 2,66      |
| ESV, $\mu$ l     | 19,0 $\pm$ 1,73  | 13,1 $\pm$ 1,57   | 19,5 $\pm$ 1,25    | 18,8 $\pm$ 1,23      |
| <b>Doppler</b>   |                  |                   |                    |                      |
| E, mm/s          | 640 $\pm$ 10,0   | 627 $\pm$ 12,4    | 662 $\pm$ 22,1     | 611 $\pm$ 43,5       |
| A, mm/s          | 414 $\pm$ 8,0    | 407 $\pm$ 16,1    | 433 $\pm$ 18,6     | 394 $\pm$ 26,2       |
| E/A              | 1,55 $\pm$ 0,026 | 1,56 $\pm$ 0,057  | 1,54 $\pm$ 0,054   | 1,55 $\pm$ 0,045     |
| E', mm/s         | -28,2 $\pm$ 0,73 | -21,9 $\pm$ 1,25g | -26,9 $\pm$ 0,67   | -27,7 $\pm$ 1,53b    |
| A', mm/s         | -16,1 $\pm$ 0,59 | -14,5 $\pm$ 0,98  | -17,9 $\pm$ 1,00   | -18,2 $\pm$ 1,48     |
| E/E'             | -22,8 $\pm$ 0,56 | -29,3 $\pm$ 1,58g | -24,4 $\pm$ 1,04   | -22,1 $\pm$ 1,12c    |
| E'/A'            | 1,77 $\pm$ 0,074 | 1,52 $\pm$ 0,034e | 1,54 $\pm$ 0,067   | 1,55 $\pm$ 0,069     |

**Table S3:** Echo data from elderly mice treated or not with AngII. Left ventricle parameters were measured in 24-month-old female (F) mice, ovariectomized (Ovx) or not, and treated or not for 28 days with AngII. Results are expressed as the mean  $\pm$  SEM for the indicated number of animals. Statistical differences between Non-Ovx and Ovx mice, and between CTRL and AngII mice were analyzed using two-way ANOVA and Holm-Sidak post-test for multiple comparison. a:  $p < 0.05$  between Ovx group and its corresponding Control group (F24 or F24 AngII, respectively). e:  $p < 0.05$ , f:  $p < 0.01$ , and g:  $p < 0.001$  between an AngII group and its corresponding Control group (F24 or F24 Ovx, respectively).

| Parameters              | F24<br>N=7-8     | F24 AngII<br>N=7 | F24 Ovx<br>N=8    | F24 Ovx AngII<br>N=7-8 |
|-------------------------|------------------|------------------|-------------------|------------------------|
| <b><i>M-Mode</i></b>    |                  |                  |                   |                        |
| EDD, mm                 | 4,0 $\pm$ 0,09   | 3,6 $\pm$ 0,09e  | 3,8 $\pm$ 0,04    | 3,6 $\pm$ 0,07         |
| ESD, mm                 | 2,6 $\pm$ 0,08   | 2,5 $\pm$ 0,11   | 2,6 $\pm$ 0,08    | 2,2 $\pm$ 0,08e        |
| PW, mm                  | 0,97 $\pm$ 0,045 | 0,98 $\pm$ 0,026 | 0,86 $\pm$ 0,022  | 1,08 $\pm$ 0,069f      |
| IVS, mm                 | 0,88 $\pm$ 0,030 | 0,94 $\pm$ 0,035 | 0,77 $\pm$ 0,016a | 0,95 $\pm$ 0,034g      |
| RWT                     | 0,47 $\pm$ 0,021 | 0,53 $\pm$ 0,012 | 0,42 $\pm$ 0,012  | 0,56 $\pm$ 0,030g      |
| <b><i>Simpson's</i></b> |                  |                  |                   |                        |
| SV, mm                  | 36,8 $\pm$ 2,31  | 30,0 $\pm$ 2,29  | 31,8 $\pm$ 1,09   | 27,4 $\pm$ 1,46        |
| EF, %                   | 59,4 $\pm$ 2,37  | 57,4 $\pm$ 1,91  | 56,1 $\pm$ 1,78   | 54,9 $\pm$ 2,84        |
| HR, bpm                 | 480 $\pm$ 30,0   | 521 $\pm$ 15,7   | 489 $\pm$ 6,2     | 524 $\pm$ 16,9         |
| CO, ml/min              | 16,3 $\pm$ 2,15  | 15,6 $\pm$ 1,14  | 15,5 $\pm$ 0,46   | 14,2 $\pm$ 0,64        |
| EDV, $\mu$ l            | 61,9 $\pm$ 2,46  | 52,0 $\pm$ 2,90  | 56,9 $\pm$ 1,75   | 50,5 $\pm$ 3,34        |
| ESV, $\mu$ l            | 25,1 $\pm$ 1,56  | 22,0 $\pm$ 1,23  | 25,1 $\pm$ 1,55   | 23,2 $\pm$ 2,68        |
| <b><i>Doppler</i></b>   |                  |                  |                   |                        |
| E, mm/s                 | 614 $\pm$ 41,9   | 561 $\pm$ 27,5   | 626 $\pm$ 18,2    | 627 $\pm$ 53,4         |
| A, mm/s                 | 396 $\pm$ 26,1   | 370 $\pm$ 26,3   | 418 $\pm$ 10,0    | 431 $\pm$ 38,8         |
| E/A                     | 1,55 $\pm$ 0,046 | 1,53 $\pm$ 0,054 | 1,51 $\pm$ 0,059  | 1,46 $\pm$ 0,026       |
| E', mm/s                | -29,6 $\pm$ 1,99 | -25,3 $\pm$ 1,23 | -28,2 $\pm$ 0,96  | -25,6 $\pm$ 1,64       |
| A', mm/s                | -19,5 $\pm$ 2,02 | -17,3 $\pm$ 0,46 | -18,1 $\pm$ 0,56  | -16,6 $\pm$ 1,14       |
| E/E'                    | -20,9 $\pm$ 1,40 | -22,5 $\pm$ 1,58 | -22,3 $\pm$ 0,50  | -24,7 $\pm$ 1,91       |
| E'/A'                   | 1,56 $\pm$ 0,096 | 1,46 $\pm$ 0,044 | 1,56 $\pm$ 0,051  | 1,55 $\pm$ 0,036       |

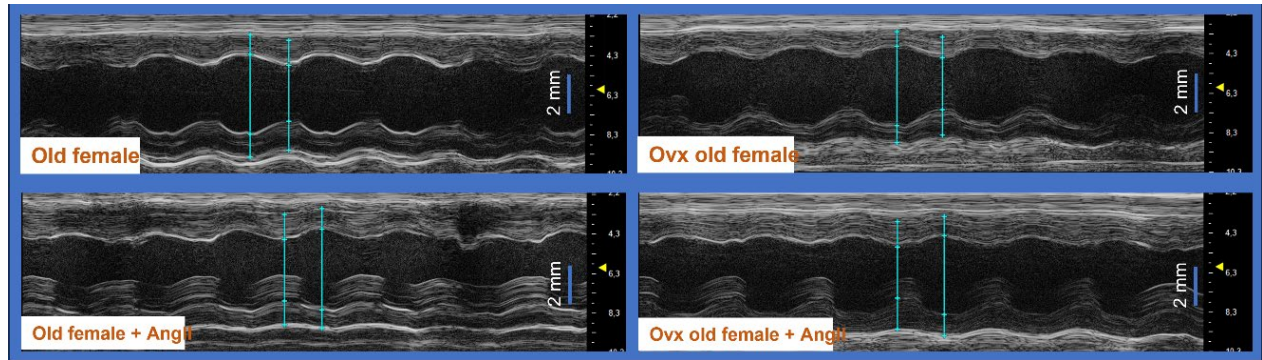

**Figure S1.** Representative M-mode echo images of the LV of old females (Ovx or not) treated or not with AngII. Light blue lines represent diastolic and systolic measurements of LV wall thickness and chamber diameter. Scaling bar: 2 mm. The images from young mice go from 2.2 to 9.3mm and those from old mice from 2.2 to 10.3 mm.

**Table S4** Gene ontology (GO) list of biological processes from differentially expressed left ventricle or left atrial genes by AngII in old female mice (Ovx or not) compared to old mice. The list is limited to the top 10 biological processes which have the lowest false discovery rate. Number (Nb) of genes included for each category and fold enrichment over expected representation. In bold face, categories present in every comparison.

| GO biological process                          | Nb of genes | Fold enrichment | False discovery rate |
|------------------------------------------------|-------------|-----------------|----------------------|
| <b>LV Old mice vs. Old AngII</b>               | <b>149</b>  |                 |                      |
| <b>extracellular structure organization</b>    | 22          | 11.57           | 5.74E-13             |
| external encapsulating structure organization  | 22          | 11.57           | 8.61E-13             |
| extracellular matrix organization              | 22          | 11.65           | 1.49E-12             |
| anatomical structure morphogenesis             | 51          | 3.18            | 9.62E-11             |
| collagen fibril organization                   | 12          | 31.78           | 1.10E-10             |
| tissue development                             | 44          | 3.51            | 3.21E-10             |
| animal organ development                       | 54          | 2.68            | 8.50E-09             |
| <b>developmental process</b>                   | 80          | 2.01            | 1.21E-08             |
| <b>anatomical structure development</b>        | 76          | 2.04            | 2.93E-08             |
| regulation of multicellular organismal process | 56          | 2.50            | 2.98E-08             |

| GO biological process                                   | Nb of genes | Fold enrichment | False discovery rate |
|---------------------------------------------------------|-------------|-----------------|----------------------|
| <b>LV Old Ovx mice vs. Old Ovx AngII</b>                | <b>187</b>  |                 |                      |
| regulation of multicellular organismal process          | 71          | 2.43            | 3.83E-09             |
| animal organ development                                | 60          | 2.28            | 2.54E-06             |
| <b>anatomical structure development</b>                 | 88          | 1.81            | 2.57E-06             |
| <b>extracellular structure organization</b>             | 17          | 6.85            | 2.77E-06             |
| <b>developmental process</b>                            | 93          | 1.79            | 3.05E-06             |
| external encapsulating structure organization           | 17          | 6.85            | 3.23E-06             |
| extracellular matrix organization                       | 17          | 6.90            | 3.49E-06             |
| tissue development                                      | 45          | 2.75            | 4.14E-06             |
| positive regulation of multicellular organismal process | 44          | 2.62            | 5.80E-06             |
| system development                                      | 65          | 2.08            | 5.88E-06             |

| GO biological process                         | Nb of genes | Fold enrichment | False discovery rate |
|-----------------------------------------------|-------------|-----------------|----------------------|
| <b>LA Old mice vs. Old AngII</b>              | <b>214</b>  |                 |                      |
| anatomical structure morphogenesis            | 63          | 2.73            | 1.63E-09             |
| multicellular organism development            | 89          | 2.11            | 3.08E-09             |
| system development                            | 78          | 2.27            | 5.06E-09             |
| <b>anatomical structure development</b>       | 102         | 1.90            | 7.97E-09             |
| <b>developmental process</b>                  | 105         | 1.83            | 2.14E-08             |
| multicellular organismal process              | 122         | 1.62            | 4.04E-07             |
| cell adhesion                                 | 31          | 3.50            | 5.12E-06             |
| <b>extracellular structure organization</b>   | 17          | 6.22            | 7.59E-06             |
| regulation of cell communication              | 69          | 2.00            | 8.19E-06             |
| external encapsulating structure organization | 17          | 6.22            | 8.35E-06             |

| GO biological process                       | Nb of genes | Fold enrichment | False discovery rate |
|---------------------------------------------|-------------|-----------------|----------------------|
| <b>LA Old Ovx mice vs. Old Ovx AngII</b>    | <b>413</b>  |                 |                      |
| system development                          | 139         | 2.06            | 2.88E-13             |
| anatomical structure morphogenesis          | 105         | 2.32            | 3.77E-12             |
| multicellular organism development          | 153         | 1.85            | 1.62E-11             |
| <b>developmental process</b>                | <b>187</b>  | <b>1.67</b>     | <b>4.20E-11</b>      |
| <b>anatomical structure development</b>     | <b>177</b>  | <b>1.69</b>     | <b>1.25E-10</b>      |
| animal organ development                    | 115         | 2.03            | 4.68E-10             |
| tissue development                          | 82          | 2.32            | 4.11E-09             |
| <b>extracellular structure organization</b> | <b>28</b>   | <b>5.23</b>     | <b>1.05E-08</b>      |
| extracellular matrix organization           | 28          | 5.27            | 1.12E-08             |
| regulation of biological quality            | 114         | 1.91            | 1.14E-08             |

**Table S5** Gene ontology (GO) list of cellular components from differentially expressed left ventricle or left atrial genes by AngII in old female mice (Ovx or not) compared to old mice. The list is limited to the top 10 biological processes which have the lowest false discovery rate. Number (Nb) of genes included for each category and fold enrichment over expected representation. In bold face, categories present in every comparison.

| GO cellular component                           | Nb of genes | Fold enrichment | False discovery rate |
|-------------------------------------------------|-------------|-----------------|----------------------|
| <b>LV Old mice vs. Old AngII</b>                | <b>149</b>  |                 |                      |
| <b>external encapsulating structure</b>         | <b>39</b>   | <b>10.82</b>    | <b>2.80E-25</b>      |
| <b>extracellular region</b>                     | <b>73</b>   | <b>4.09</b>     | <b>3.00E-25</b>      |
| <b>extracellular matrix</b>                     | <b>39</b>   | <b>10.86</b>    | <b>4.90E-25</b>      |
| <b>extracellular space</b>                      | <b>62</b>   | <b>4.61</b>     | <b>3.58E-23</b>      |
| <b>collagen-containing extracellular matrix</b> | <b>33</b>   | <b>12.14</b>    | <b>9.14E-23</b>      |
| <b>cell periphery</b>                           | <b>84</b>   | <b>2.00</b>     | <b>5.70E-10</b>      |
| collagen trimer                                 | 11          | 19.78           | 9.69E-09             |
| basement membrane                               | 11          | 13.93           | 2.63E-07             |
| banded collagen fibril                          | 4           | 48.56           | 7.02E-04             |
| fibrillar collagen trimer                       | 4           | 48.56           | 7.80E-04             |

| GO cellular component                           | Nb of genes | Fold enrichment | False discovery rate |
|-------------------------------------------------|-------------|-----------------|----------------------|
| <b>LV Old Ovx mice vs. Old Ovx AngII</b>        | <b>187</b>  |                 |                      |
| <b>external encapsulating structure</b>         | <b>37</b>   | <b>7.87</b>     | <b>9.43E-19</b>      |
| <b>extracellular matrix</b>                     | <b>37</b>   | <b>7.90</b>     | <b>1.67E-18</b>      |
| <b>collagen-containing extracellular matrix</b> | <b>32</b>   | <b>9.02</b>     | <b>1.07E-17</b>      |
| <b>extracellular region</b>                     | <b>71</b>   | <b>3.05</b>     | <b>1.05E-15</b>      |
| <b>extracellular space</b>                      | <b>57</b>   | <b>3.25</b>     | <b>4.35E-13</b>      |
| <b>cell periphery</b>                           | <b>99</b>   | <b>1.80</b>     | <b>1.47E-08</b>      |
| collagen trimer                                 | 9           | 12.41           | 3.06E-05             |
| basement membrane                               | 8           | 7.77            | 3.17E-03             |

| GO cellular component                    | Nb of genes | Fold enrichment | False discovery rate |
|------------------------------------------|-------------|-----------------|----------------------|
| <b>LA Old mice vs. Old AngII</b>         | <b>214</b>  |                 |                      |
| external encapsulating structure         | 35          | 6.76            | 1.77E-15             |
| extracellular matrix                     | 35          | 6.78            | 3.17E-15             |
| collagen-containing extracellular matrix | 29          | 7.42            | 1.29E-13             |
| extracellular region                     | 66          | 2.57            | 1.73E-10             |
| cell periphery                           | 111         | 1.84            | 3.43E-10             |
| extracellular space                      | 53          | 2.74            | 4.98E-09             |
| collagen trimer                          | 8           | 10.01           | 7.38E-04             |
| supramolecular polymer                   | 26          | 2.77            | 9.41E-04             |
| supramolecular fiber                     | 24          | 2.57            | 5.25E-03             |
| basement membrane                        | 8           | 7.05            | 5.67E-03             |

| GO cellular component                    | Nb of genes | Fold enrichment | False discovery rate |
|------------------------------------------|-------------|-----------------|----------------------|
| <b>LA Old Ovx mice vs. Old Ovx AngII</b> | <b>413</b>  |                 |                      |
| cell periphery                           | 222         | 1.87            | 3.76E-22             |
| external encapsulating structure         | 57          | 5.62            | 9.50E-22             |
| extracellular matrix                     | 57          | 5.64            | 1.20E-21             |
| extracellular region                     | 129         | 2.57            | 4.22E-21             |
| extracellular space                      | 102         | 2.69            | 2.64E-17             |
| collagen-containing extracellular matrix | 44          | 5.75            | 5.87E-17             |
| plasma membrane                          | 172         | 1.58            | 1.07E-08             |
| synapse                                  | 72          | 2.32            | 1.75E-08             |
| plasma membrane region                   | 63          | 2.36            | 1.44E-07             |
| cell surface                             | 54          | 2.55            | 1.91E-07             |



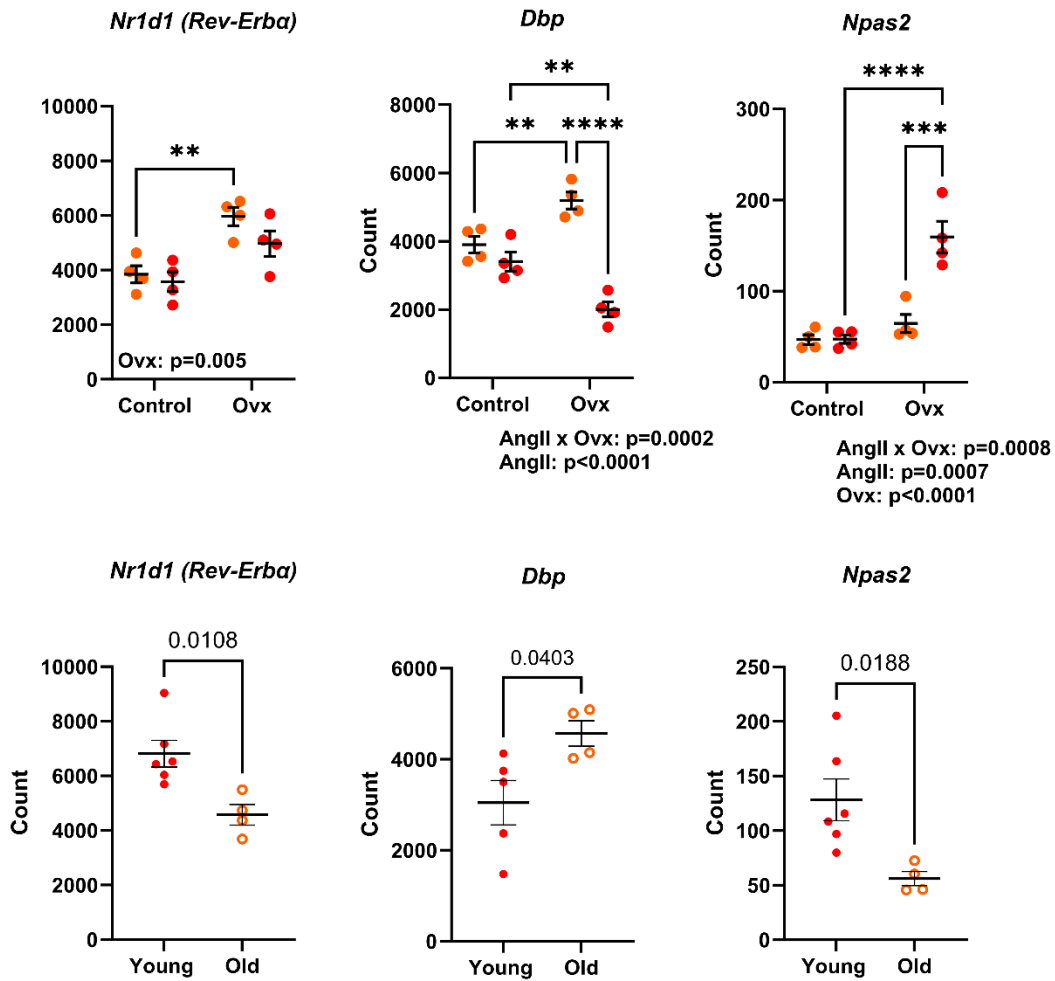

**Figure S2.** Expression of several circadian clock genes in young vs. old mice. Males (blue) and female (orange) mice. *Nr1d1 (Rev-Erba)*: nuclear receptor subfamily 1 group D member 1, *Dbp*, D site albumin promoter binding protein and *Npas2*: neuronal PAS domain protein 2. Results are expressed as the mean  $\pm$  SEM (n = 4). Statistical analysis by two-way ANOVA followed by Holm-Sidak post-test (up) or Student T-test (bottom). p values are indicated when under 0.05 below graphs. \*\*: p<0.01, \*\*\*: p<0.001 and \*\*\*\*: p<0.0001 between indicated groups.

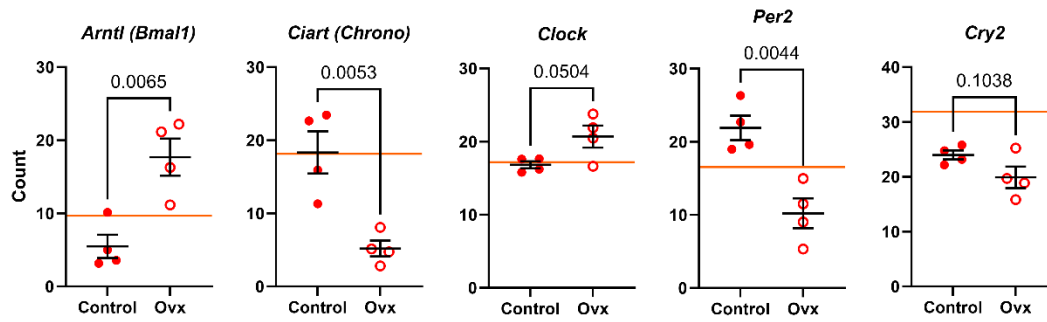

**Figure S3.** Expression of several circadian clock genes in the left atrium between elderly mice (control or Ovx). *Arntl*: Basic Helix-Loop-Helix ARNT Like 1, *Ciart*: Circadian Associated Repressor of Transcription, *Clock*: Clock Circadian Regulator, *Per2*: Period Circadian Regulator 2 and *Cry2*: Cryptochrome Circadian Regulator 2. The line represents the average expression of a given gene in young females.. Results are expressed as the mean  $\pm$  SEM (n = 4-6). Statistical analysis by two-way ANOVA followed by Holm-Sidak post-test. Age and Sex p values are indicated when under 0.05 besides graphs. \*\*: p<0.01, \*\*\*: p<0.001 and \*\*\*\*: p<0.0001 between indicated groups.
